# Supplementary material for: Genetic Influences on Brain Gene Expression in Rats Selected for Tameness and Aggression
Source: Oxford University Press journal article supplement (doi:10.1534/genetics.114.168948), 2014-09-03
Supplement: figures1.pdf [file figures1.pdf]

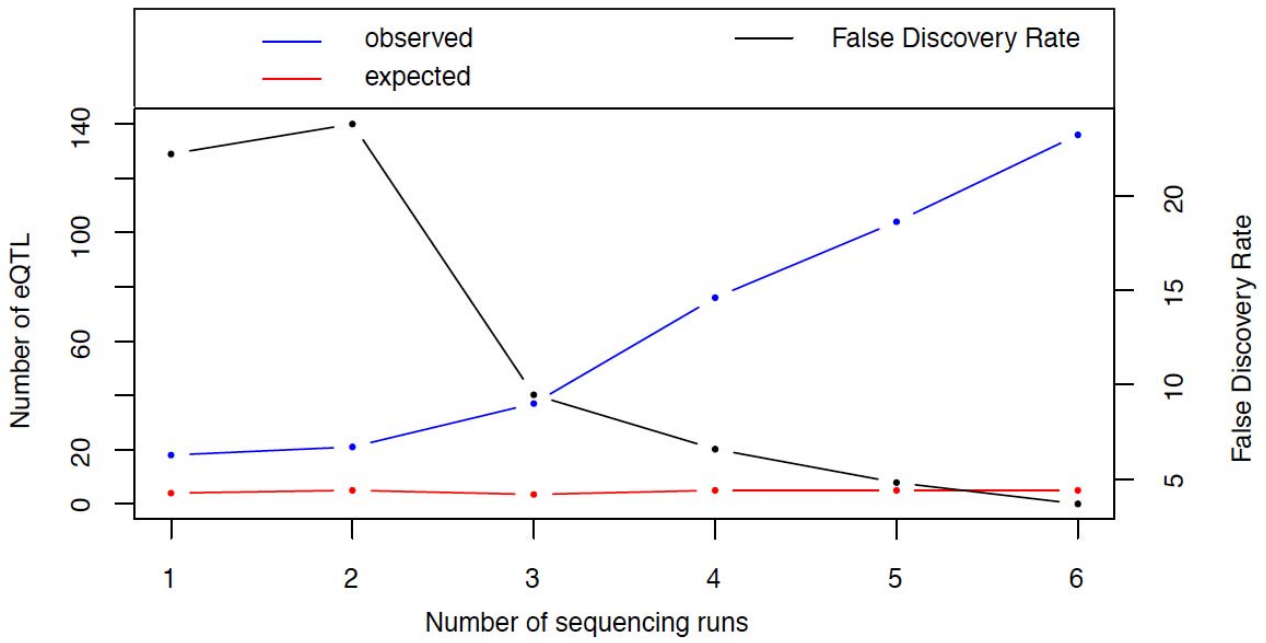

**Figure S1. Expected and observed eQTL as a function of sequencing depth.** These down-sampling analyses were used to evaluate the power of the study. As a proxy of sequencing depth we used the number of Illumina sequencing runs. Each Illumina sequencing run corresponded to approximately two million additional reads per animal.
