# Supplementary material for: Genetic Influences on Brain Gene Expression in Rats Selected for Tameness and Aggression
Source: Oxford University Press journal article supplement (doi:10.1534/genetics.114.168948), 2014-09-03
Supplement: figures3.pdf [file figures3.pdf]

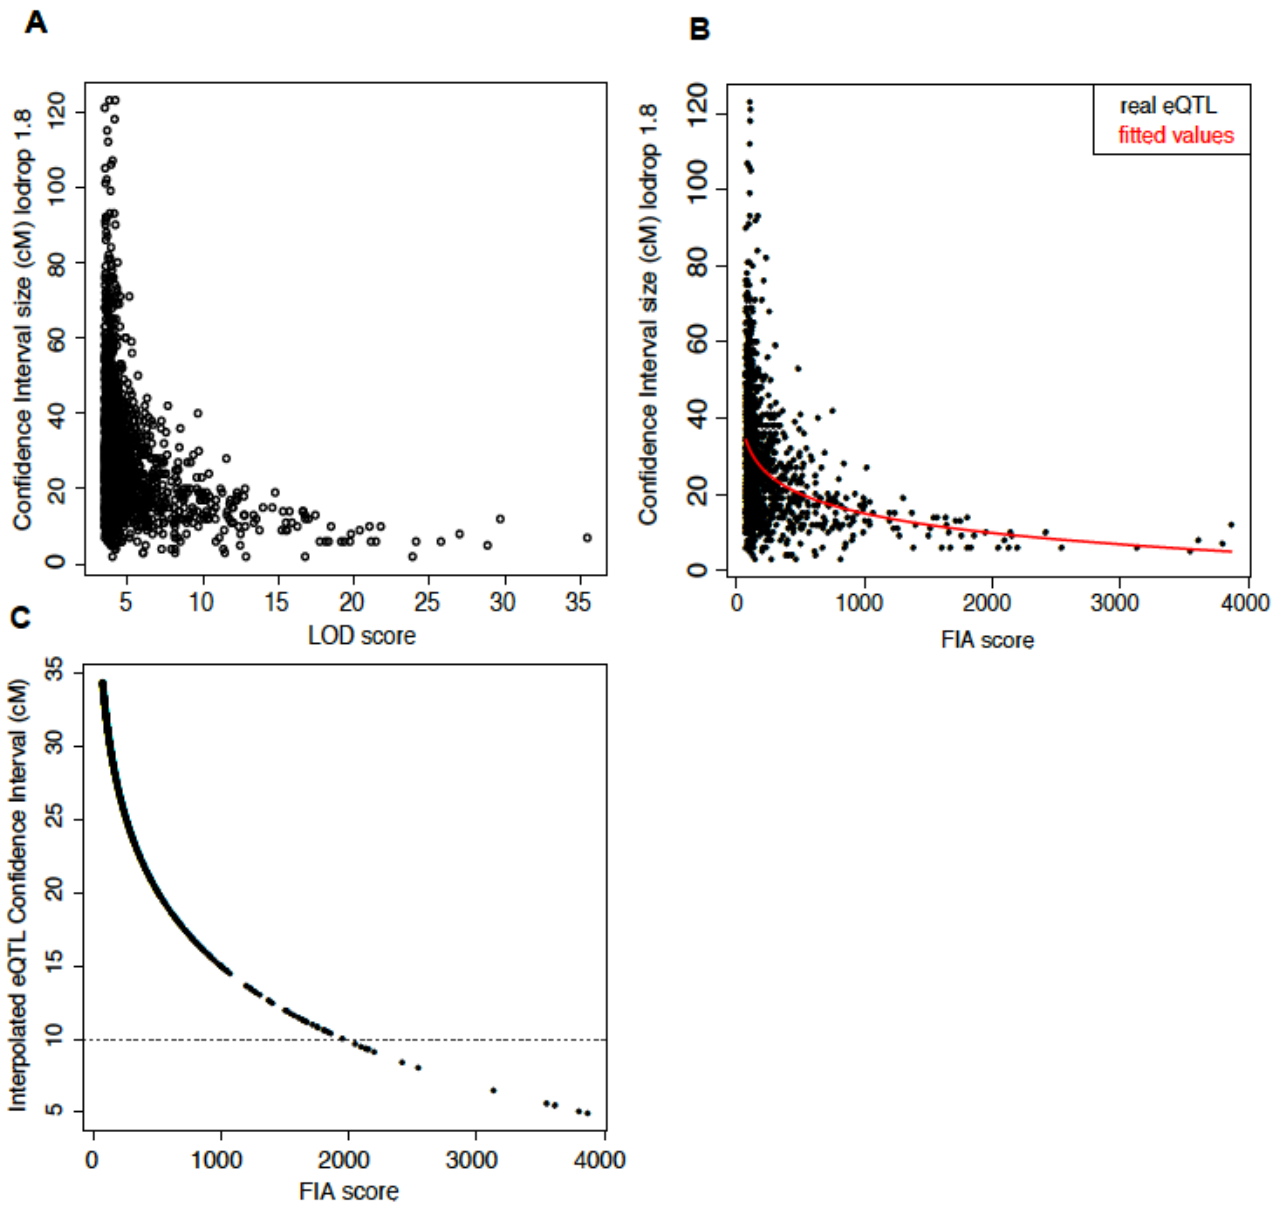

**Figure S3. Defining FIA eQTL confidence intervals based on eQTL also detected by HKR.** A, LOD scores of HKR eQTL and their 1.8 LOD drop confidence intervals. B, For the same set of eQTL as in A, shown are the FIA scores vs. the HKR 1.8 LOD drop confidence interval. The fitted function is shown as a red line. C, Interpolated confidence intervals for all FIA eQTL versus FIA scores. The confidence interval cut-off at 10 cM is shown as the dashed horizontal line.
