# Supplementary material for: Genetic Influences on Brain Gene Expression in Rats Selected for Tameness and Aggression
Source: Oxford University Press journal article supplement (doi:10.1534/genetics.114.168948), 2014-09-03
Supplement: figures4.pdf [file figures4.pdf]

D

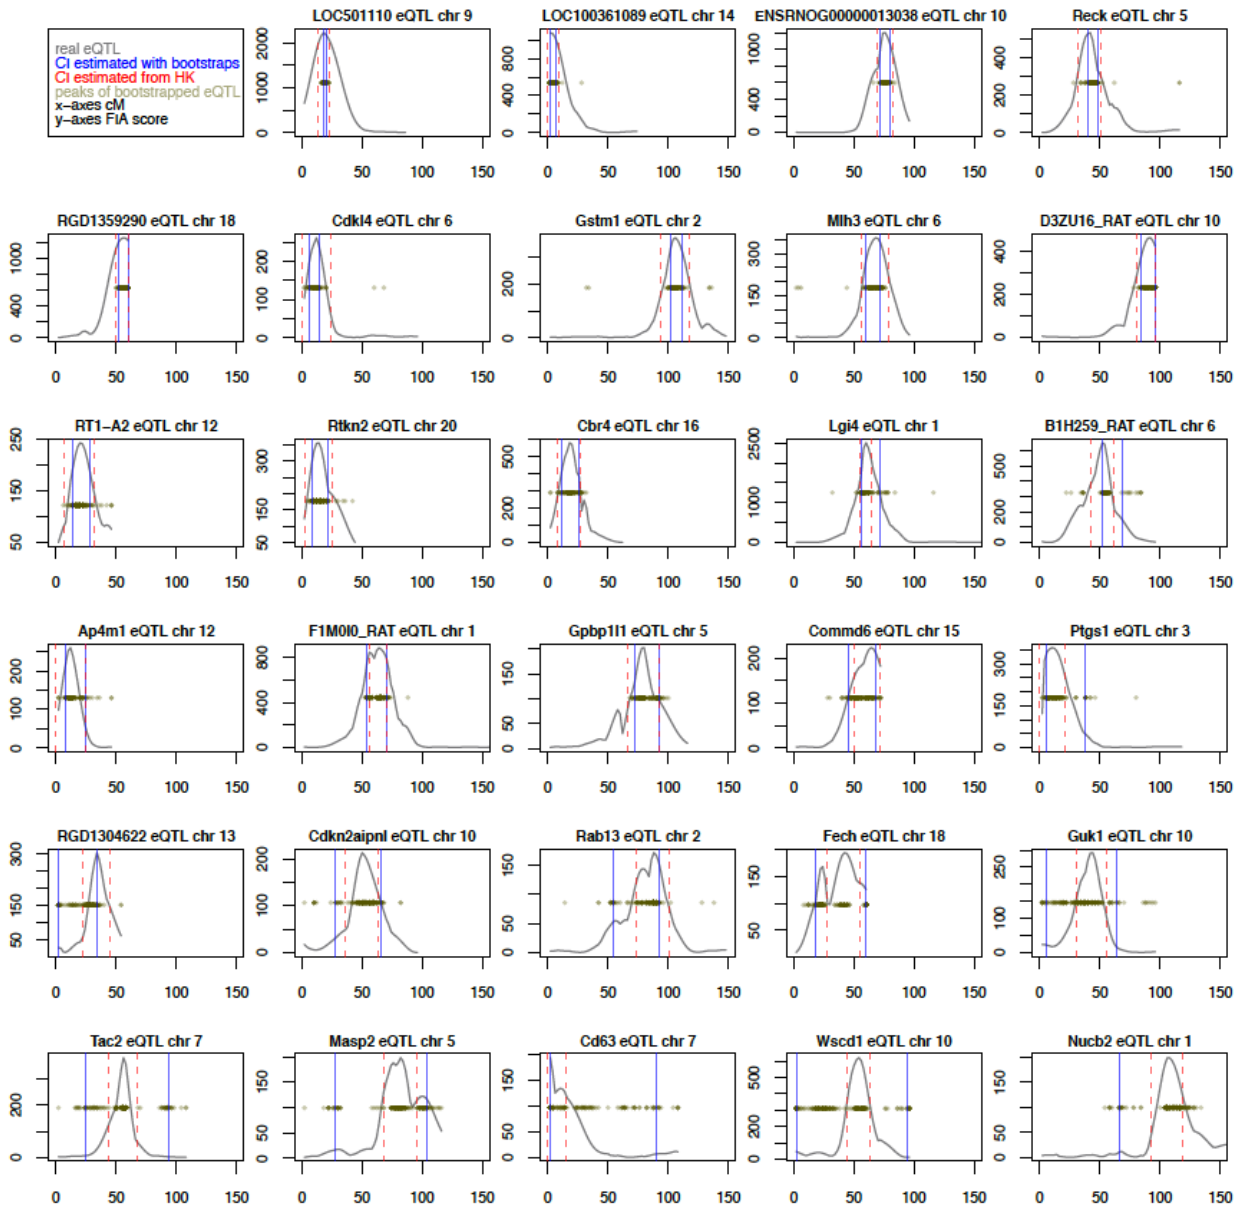

**Figure S4 Comparing inferred FIA eQTL confidence intervals to bootstrap results.** Shown are the 95% respective confidence intervals for 29 randomly chosen FIA eQTL. The FIA score profiles are shown as grey lines. X-axes show genomic locations in cM. Y-axes show FIA significance scores. The peak location of each of 200 bootstraps are shown as transparent green dots. Bootstrap derived 95% confidence intervals are shown as blue vertical lines and confidence intervals derived via HKR are shown as red dashed vertical lines.
