# Supplementary material for: Genetic Influences on Brain Gene Expression in Rats Selected for Tameness and Aggression
Source: Oxford University Press journal article supplement (doi:10.1534/genetics.114.168948), 2014-09-03
Supplement: figures5.pdf [file figures5.pdf]

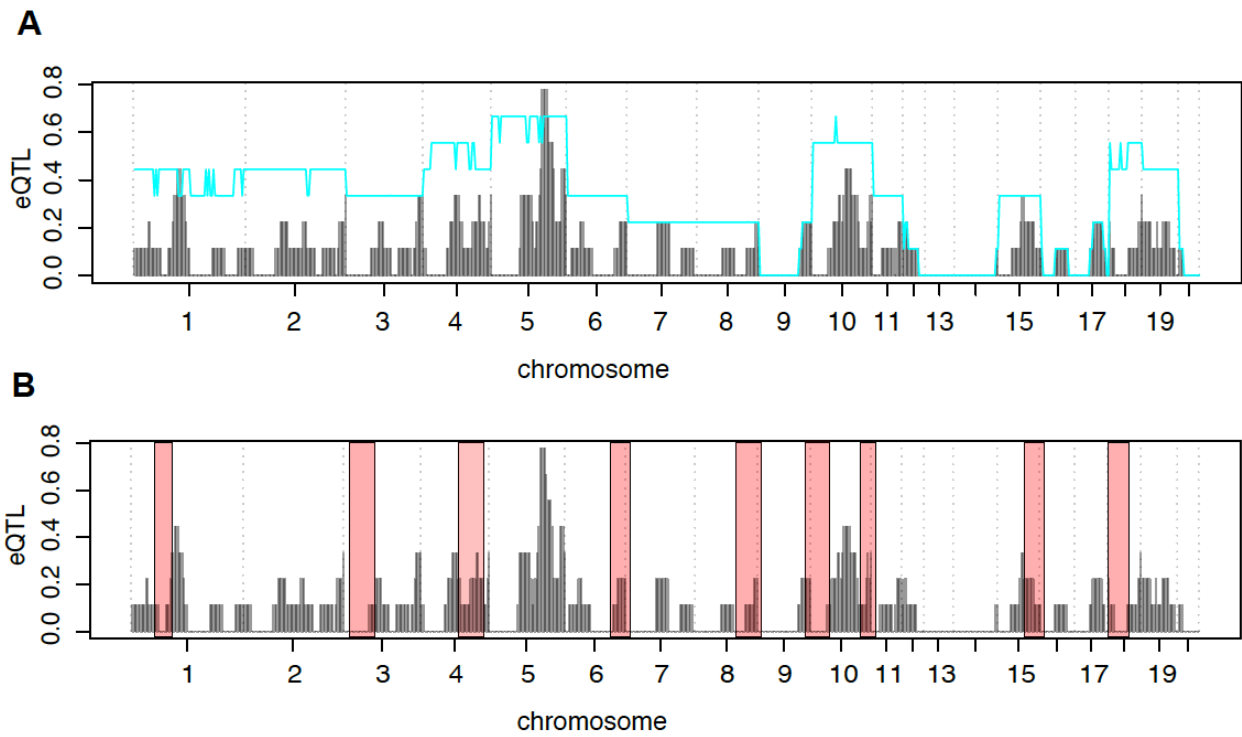

**Figure S5. The number of distant eQTL along the genome.** The grey bars are identical in A and B and indicate the average number of distant eQTL per 2cM window based on a sliding window analysis. The width of the window was 18 cM, corresponding to the median size of the eQTL confidence intervals. A, The 99<sup>th</sup> quantile of the expected eQTL density from 1,000 randomizations of eQTL positions per chromosome is shown as a blue line. B, Light red rectangles: Confidence intervals for tameness QTL locations.
