# Supplementary material for: Genetic Influences on Brain Gene Expression in Rats Selected for Tameness and Aggression
Source: Oxford University Press journal article supplement (doi:10.1534/genetics.114.168948), 2014-09-03
Supplement: figures6.pdf [file figures6.pdf]

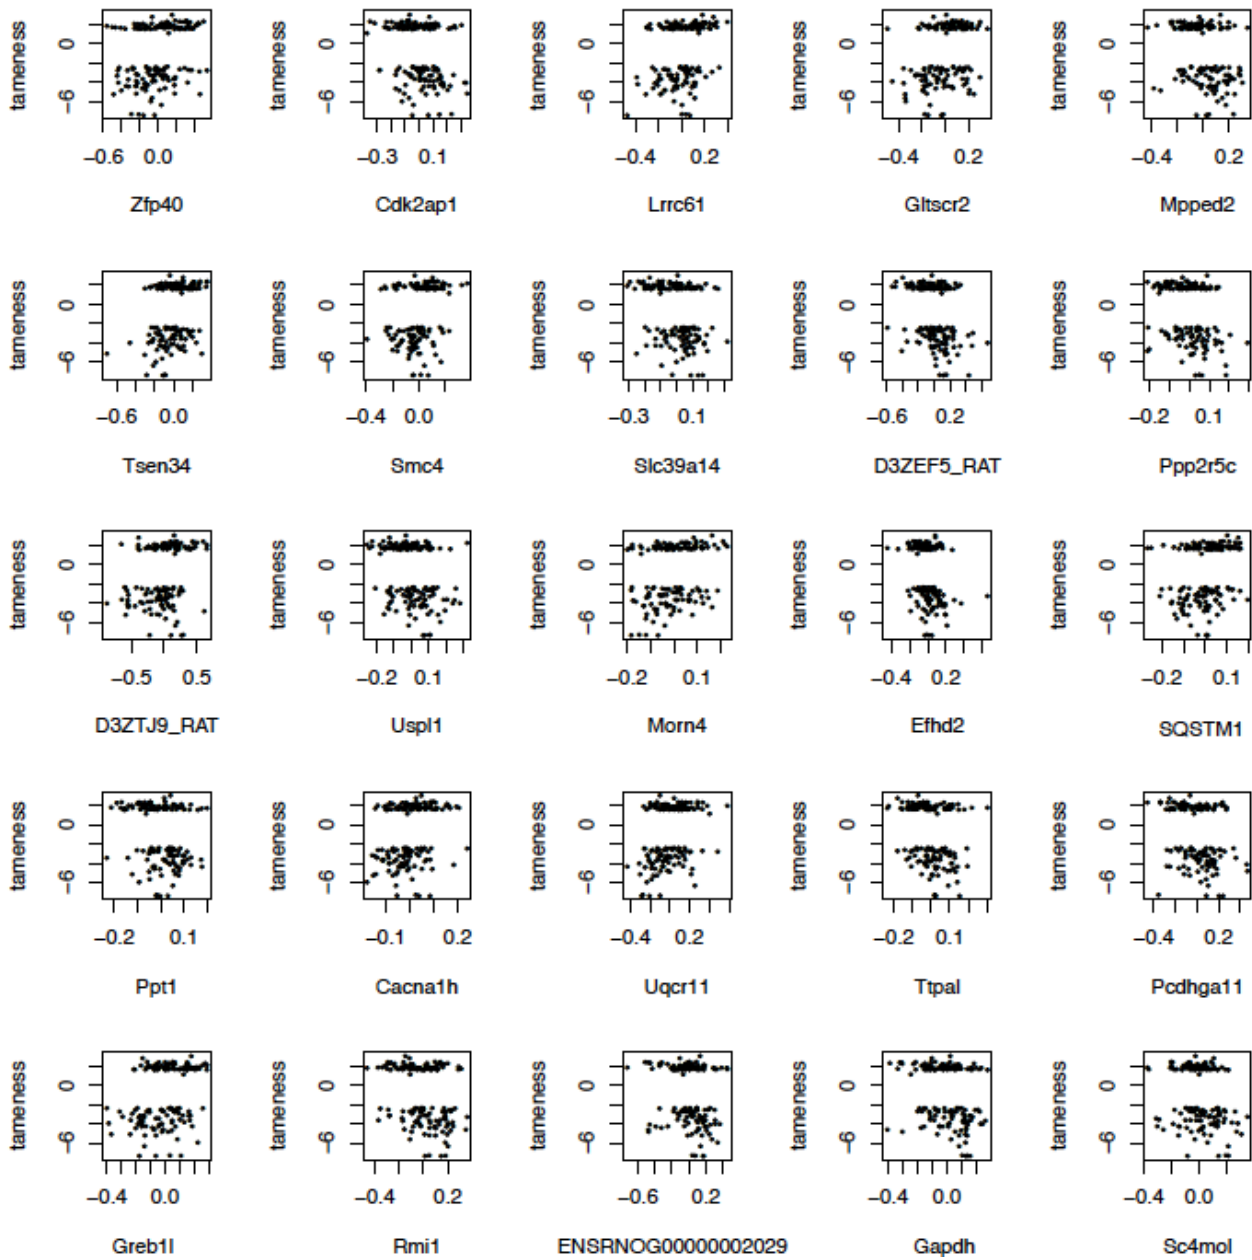

**Figure S6. Tameness and gene expression values for the 25 genes with the highest correlations between these two traits.** The bimodality in the tameness score is a result of the selection of the 150 most extreme tame and aggressive individuals of the F2 intercross for inclusion in this study.
