# Supplementary material for: Genetic Influences on Brain Gene Expression in Rats Selected for Tameness and Aggression
Source: Oxford University Press journal article supplement (doi:10.1534/genetics.114.168948), 2014-09-03
Supplement: figures8.pdf [file figures8.pdf]

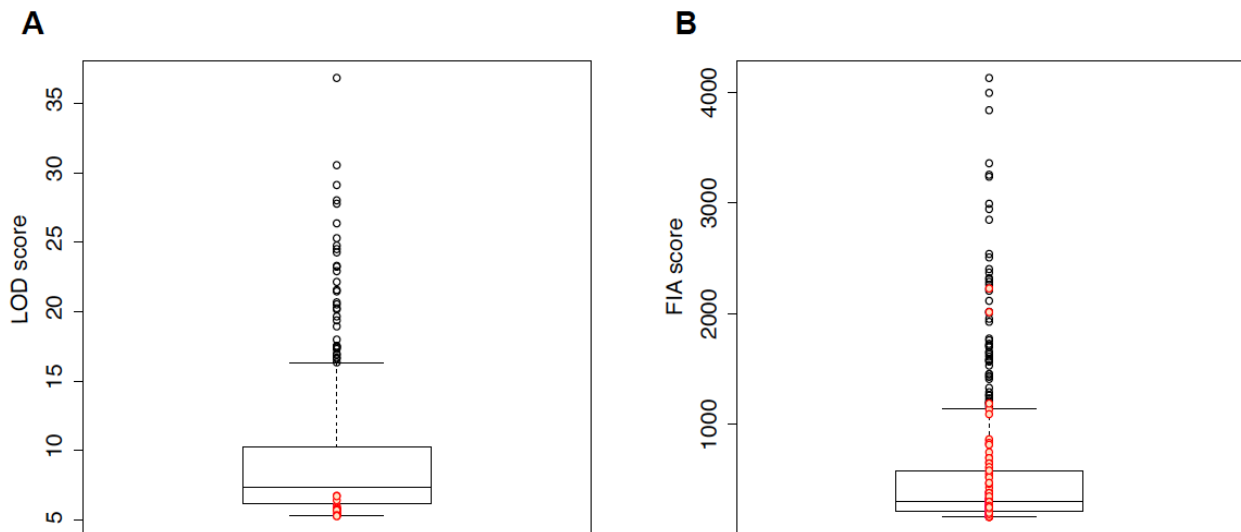

**Figure S8. Statistical support for eQTL only found by Haley-Knott Regression (HKR) or Flexible Intercross Analysis (FIA).** A. Boxplot of the LOD scores for all (n=443) eQTL identified by HKR. The LOD scores for eQTL (n=32) only detected by HKR (and not by FIA) are shown as red dots. B. Boxplot of the significance scores of all (n=689) eQTL detected by FIA. The scores for eQTL only detected by FIA (n=278) (and not by HKR) are shown as red dots.
