# Supplementary material for: Genetic Influences on Brain Gene Expression in Rats Selected for Tameness and Aggression
Source: Oxford University Press journal article supplement (doi:10.1534/genetics.114.168948), 2014-09-03
Supplement: figures9.pdf [file figures9.pdf]

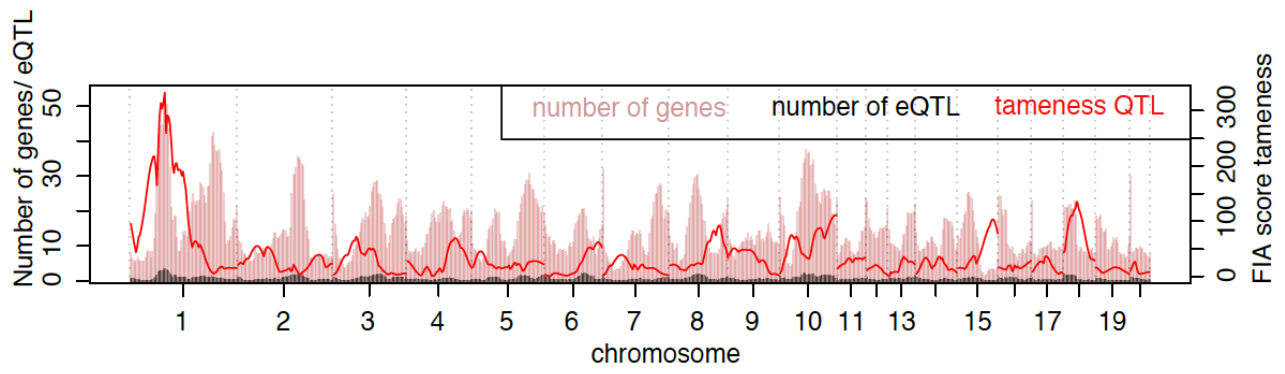

**Figure S9. Gene density and statistical support for linkage to tameness along the genome.** Light red bars: number of genes. Grey bars: number of local FIA eQTL. Red curve: FIA scores of tameness QTL mapping.
