# Supplementary material for: Genetic Influences on Brain Gene Expression in Rats Selected for Tameness and Aggression
Source: Oxford University Press journal article supplement (doi:10.1534/genetics.114.168948), 2014-09-03
Supplement: tables1.xlsx [file tables1.xlsx]

## Sheet: Sheet1
F2_intercross_number	eQTL_experiment_number	animal_number	polyA_day	polyA_month	polyA_year	batch	sequencing_index	median_insert_size_bp	sd	RIN	sex_2_is_female	tameness_phenotype
F2-001-1	117	63	5	4	11	10	29	155	60	9.8	2	-3.89
F2-001-2	6	64	15	3	11	6	7	184	60	8.9	2	-3.31
F2-001-8	149	67	29	4	11	13	49	164	60	9.7	2	-2.59
F2-002-3	116	69	5	4	11	10	26	151	60	9.3	2	-4
F2-002-4	145	70	2	5	11	14	48	159	60	9.8	2	-3.74
F2-002-6	131	72	8	4	11	11	84	161	60	9.4	2	2.79
F2-005-2	106	77	5	5	11	15	70	210	60	9.8	2	2.34
F2-005-3	97	78	14	3	11	5	17	216	60	8.7	2	-4.84
F2-006-1	102	82	14	3	11	5	65	175	60	8.8	2	2.25
F2-006-10	48	83	30	3	11	9	66	170	60	10	2	1.61
F2-008-8	32	95	16	2	11	2	48	138	60	10	2	1.78
F2-009-3	64	97	26	1	11	1	84	141	60	9.9	2	-2.41
F2-009-4	36	98	24	3	11	8	53	162	60	9	2	-3.62
F2-010-4	8	103	16	2	11	2	18	128	60	9.2	1	-3.2
F2-011-1	96	106	28	2	11	4	16	167	60	9.3	1	-5.14
F2-011-6	105	110	14	3	11	5	69	190	60	9.3	1	2.32
F2-012-2	62	112	26	1	11	1	82	137	60	9.7	1	-2.57
F2-013-1	19	114	16	2	11	2	31	153	60	9.1	1	-4.03
F2-013-5	11	117	15	3	11	6	23	187	60	8.8	1	1.72
F2-013-6	98	118	14	3	11	5	19	185	60	9.4	1	-4.62
F2-014-1	18	119	22	3	11	7	30	174	60	9.7	1	-4.15
F2-014-5	2	121	15	3	11	6	2	186	60	9.6	1	-2.76
F2-015-2	83	125	25	2	11	3	50	160	60	9	1	1.98
F2-015-3	16	126	22	3	11	7	28	166	60	9.8	1	1.89
F2-016-2	3	129	15	3	11	6	4	185	60	9.1	1	-2.62
F2-018-5	78	136	25	2	11	3	69	164	60	9.3	1	-4.33
F2-019-6	73	142	25	2	11	3	93	166	60	9.1	1	-3.61
F2-019-8	120	143	8	4	11	11	81	165	60	8.8	1	1.92
F2-019-9	142	144	29	4	11	13	90	159	60	10	1	1.77
F2-020-5	114	148	5	4	11	10	25	140	60	9.2	1	-3.16
F2-023-11	50	160	30	3	11	9	3	159	60	10	1	-2.77
F2-024-1	60	164	5	4	11	10	79	156	60	9.9	1	1.71
F2-024-2	107	165	14	3	11	5	72	169	60	9	1	2.36
F2-025-10	101	170	14	3	11	5	64	191	60	9.5	1	2.18
F2-026-2	63	175	26	1	11	1	83	154	60	9.6	1	-2.47
F2-026-7	95	177	28	2	11	4	15	162	60	9.1	1	-5.22
F2-027-8	141	182	5	5	11	15	89	153	60	9.4	1	1.76
F2-028-1	79	184	25	2	11	3	70	234	60	9	1	-4.32
F2-028-10	127	185	29	4	11	13	37	163	60	8.7	1	-5.14
F2-028-5	90	186	28	2	11	4	10	168	60	8.9	1	-7.37
F2-028-8	49	187	30	3	11	9	2	161	60	10	1	-2.85
F2-030-11	129	193	2	5	11	14	39	156	60	9.5	1	-4.76
F2-030-6	72	195	26	1	11	1	92	142	60	9.2	1	-3.62
F2-030-8	135	196	2	5	11	14	86	147	60	9.8	1	1.68
F2-031-13	23	199	22	3	11	7	36	165	60	8.9	1	2.09
F2-031-2	74	200	25	2	11	3	95	148	60	9.1	1	1.83
F2-032-4	123	204	8	4	11	11	82	161	60	9.3	1	2.14
F2-033-3	138	209	2	5	11	14	46	157	60	10	1	-2.99
F2-033-8	4	212	15	3	11	6	5	188	60	9.8	1	1.63
F2-034-5	133	213	29	4	11	13	41	144	60	8.9	1	-2.44
F2-034-6	82	214	5	5	11	15	9	143	60	9	1	-4.09
F2-034-7	88	215	28	2	11	4	59	168	60	9.1	1	2.06
F2-035-1	92	217	28	2	11	4	12	149	60	8.8	1	-5.96
F2-035-3	91	219	28	2	11	4	11	160	60	8.8	1	-7.29
F2-035-9	81	220	25	2	11	3	72	149	60	9.6	1	-4.27
F2-036-3	51	222	30	3	11	9	4	159	60	10	1	-2.75
F2-037-4	29	228	16	2	11	2	44	141	60	9.3	1	-3.27
F2-038-2	17	229	22	3	11	7	29	169	60	9.4	2	-4.58
F2-038-4	113	230	5	4	11	10	22	162	60	9.2	2	-3.18
F2-038-5	121	231	8	4	11	11	30	161	60	9	2	-4.48
F2-038-6	124	232	8	4	11	11	32	160	60	9.3	2	-7.37
F2-038-9	119	233	8	4	11	11	80	161	60	9	2	1.85
F2-039-7	27	236	16	2	11	2	42	151	60	9.4	2	1.67
F2-040-2	37	241	24	3	11	8	54	168	60	9.7	2	-2.57
F2-041-5	104	245	14	3	11	5	68	168	60	8.8	2	2.31
F2-042-3	84	249	25	2	11	3	52	165	60	9.6	2	1.98
F2-042-4	99	250	14	3	11	5	62	177	60	8.8	2	2.16
F2-042-5	143	251	29	4	11	13	91	178	60	9.9	2	1.77
F2-043-6	21	257	15	3	11	6	33	178	60	9.8	2	2.04
F2-043-7	103	258	14	3	11	5	66	188	60	9.3	2	2.29
F2-044-3	52	259	30	3	11	9	5	170	60	9.6	2	-2.72
F2-044-6	22	262	29	4	11	13	34	159	60	9.1	2	2.08
F2-047-8	43	277	24	3	11	8	60	173	60	9.7	2	1.56
F2-048-4	144	280	2	5	11	14	47	154	60	9.4	2	-3.85
F2-050-1	33	287	16	2	11	2	49	134	60	8.5	2	-3.7
F2-051-4	87	294	28	2	11	4	58	155	60	8.9	2	2.03
F2-051-6	80	295	5	5	11	15	71	188	60	9.8	2	-4.28
F2-051-8	94	296	28	2	11	4	14	153	60	8.8	2	-5.23
F2-052-8	67	301	26	1	11	1	87	140	60	9.7	2	1.57
F2-053-3	12	302	15	3	11	6	24	178	60	9.3	2	1.76
F2-055-1	77	312	25	2	11	3	68	191	60	9	2	-4.42
F2-055-9	148	316	2	5	11	14	94	158	60	9.6	2	1.86
F2-056-5	66	320	26	1	11	1	86	137	60	9.9	2	1.55
F2-057-1	30	322	24	3	11	8	45	185	60	9.5	2	1.74
F2-057-2	71	323	26	1	11	1	91	138	60	9.8	2	-3.82
F2-057-4	53	325	30	3	11	9	6	160	60	9.8	2	-2.71
F2-058-4	130	328	8	4	11	11	83	159	60	9.6	2	2.37
F2-058-9	108	331	14	3	11	5	73	189	60	9.1	2	2.37
F2-059-11	24	333	22	3	11	7	39	175	60	9.1	2	2.12
F2-059-6	47	336	30	3	11	9	64	155	60	9	2	1.61
F2-059-7	140	337	29	4	11	13	88	160	60	9.7	2	1.75
F2-065-8	146	359	27	4	11	12	92	164	60	9	2	1.78
F2-068-4	40	369	24	3	11	8	57	166	60	9.8	1	-2.41
F2-070-8	5	379	16	2	11	2	6	135	60	9.3	2	1.67
F2-074-2	15	393	22	3	11	7	27	163	60	8.9	2	1.85
F2-074-8	28	396	16	2	11	2	43	142	60	9.9	2	-3.43
F2-075-5	14	399	22	3	11	7	26	170	60	9.2	1	1.85
F2-078-2	86	413	5	5	11	15	57	177	60	8.9	2	2.02
F2-079-11	38	417	24	3	11	8	55	191	60	8.9	1	-2.46
F2-079-8	128	420	29	4	11	13	38	159	60	9.1	1	-4.83
F2-081-7	57	430	30	3	11	9	76	158	60	10	1	1.64
F2-082-1	122	431	8	4	11	11	31	162	60	9.1	1	-4.34
F2-085-4	46	444	30	3	11	9	63	166	60	9.2	2	1.61
F2-086-6	45	448	24	3	11	8	62	191	60	8.9	1	1.6
F2-089-2	65	460	26	1	11	1	85	156	60	9.7	1	-2.38
F2-093-4	112	480	5	4	11	10	20	164	60	9.2	2	-3.39
F2-095-1	61	485	26	1	11	1	80	126	60	9.8	2	-2.59
F2-096-6	93	493	28	2	11	4	13	159	60	8.7	2	-5.64
F2-096-7	20	494	16	2	11	2	32	143	60	9.2	2	-4.01
F2-102-3	9	519	5	5	11	15	21	162	60	8.8	1	-2.93
F2-102-6	89	520	28	2	11	4	60	174	60	9	1	2.13
F2-103-5	132	525	8	4	11	11	85	161	60	9.7	1	3.02
F2-108-3	68	541	26	1	11	1	88	142	60	9.1	2	1.61
F2-110-3	1	550	5	5	11	15	1	150	60	9.5	2	-2.76
F2-110-5	7	552	15	3	11	6	9	175	60	9.5	2	-3.21
F2-112-3	147	558	27	4	11	12	93	163	60	9.1	1	1.78
F2-114-3	34	568	16	2	11	2	50	142	60	9.7	2	-3.64
F2-115-4	69	575	26	1	11	1	89	156	60	9	1	1.61
F2-117-2	10	581	15	3	11	6	22	185	60	9.3	1	1.72
F2-117-3	85	582	28	2	11	4	56	176	60	8.9	1	2
F2-119-2	125	590	8	4	11	11	33	151	60	8.9	1	-7.33
F2-119-5	109	593	5	4	11	10	74	139	60	9.1	1	2.39
F2-123-1	100	609	14	3	11	5	63	167	60	8.8	1	2.17
F2-124-1	75	613	25	2	11	3	96	158	60	9	1	1.92
F2-125-2	76	619	25	2	11	3	67	151	60	8.9	2	1.94
F2-127-1	41	628	24	3	11	8	58	165	60	9.7	2	-2.38
F2-127-2	13	629	22	3	11	7	25	163	60	9	2	-3.44
F2-127-4	134	631	2	5	11	14	42	165	60	9	2	-2.43
F2-128-1	39	633	24	3	11	8	56	162	60	9.1	1	-2.41
F2-128-5	139	637	27	4	11	12	86	143	60	9.4	1	1.74
F2-129-2	44	638	24	3	11	8	61	186	60	9	1	1.58
F2-130-4	137	646	2	5	11	14	45	165	60	9.7	1	-3.12
F2-130-6	58	647	5	4	11	10	77	162	60	9.8	1	1.67
F2-131-4	136	651	2	5	11	14	44	152	60	10	2	-3.18
F2-132-2	25	654	16	2	11	2	40	129	60	9.6	2	-2.74
F2-133-4	56	661	30	3	11	9	74	156	60	10	2	1.63
F2-134-1	26	663	22	3	11	7	41	164	60	9.6	1	-2.74
F2-137-2	54	678	30	3	11	9	8	156	60	8.9	1	-2.65
F2-139-1	150	684	29	4	11	13	95	157	60	9.9	2	1.64
F2-139-5	35	688	5	5	11	15	51	165	60	9.6	2	-3.63
F2-143-1	42	702	24	3	11	8	59	165	60	9.8	2	1.55
F2-143-2	118	703	5	5	11	15	79	181	60	8.9	2	1.82
F2-143-3	110	704	5	4	11	10	75	173	60	9.1	2	2.41
F2-144-3	31	707	16	2	11	2	46	137	60	9.9	2	1.75
F2-144-5	115	709	5	4	11	10	77	156	60	9.2	2	1.72
F2-145-2	111	711	5	4	11	10	76	153	60	9.8	1	1.66
F2-147-4	126	721	8	4	11	11	35	151	60	8.9	2	-6.33
F2-148-4	70	725	26	1	11	1	90	164	60	10	1	1.62
F2-151-1	55	730	30	3	11	9	73	152	60	10	1	1.62
F2-151-4	59	733	5	4	11	10	78	163	60	10	1	1.68
