# Supplementary material for: Genetic Influences on Brain Gene Expression in Rats Selected for Tameness and Aggression
Source: Oxford University Press journal article supplement (doi:10.1534/genetics.114.168948), 2014-09-03
Supplement: tables2.xlsx [file tables2.xlsx]

## Sheet: Sheet1
Covariates	Number of genes	Number of genes with eQTL
sex	20139	247
batch, sex	20139	335
SVA, sex	20139	412
SVA, sex	14,000*	440
	*14,000 highest expressed genes
