# Supplementary material for: Genetic Influences on Brain Gene Expression in Rats Selected for Tameness and Aggression
Source: Oxford University Press journal article supplement (doi:10.1534/genetics.114.168948), 2014-09-03
Supplement: tables3.xlsx [file tables3.xlsx]

## Sheet: Sheet1
ensembl_gene_id	eQTL_chr	eQTL_start_cM	eQTL_peak_cM	eQTL_end_cM	eQTL_start_Mb	eQTL_peak_Mb	eQTL_end_Mb	eQTL	LOD_score	variance_explained_eQTL	eQTL_overlap_tamenessQTL
ENSRNOG00000004090	1	59.3598	65.3963	86.5244	88.8247	96.3704	131.194	distant	5.97	9.88	yes
ENSRNOG00000011675	1	43.2622	50.3049	55.3354	47.765	62.0751	81.5884	local	20.52	35.23	yes
ENSRNOG00000012698	1	73.4451	79.4817	90.5488	109.366	121.43	139.721	local	7.41	16.22	no
ENSRNOG00000013023	1	50.3049	53.3232	55.3354	62.0751	75.3377	81.5884	local	21.46	18.4	yes
ENSRNOG00000013622	1	155.945	163.994	165	246.17	256.603	257	distant	5.28	6.11	no
ENSRNOG00000013702	1	100.61	105.64	115.701	162.06	172.207	187.625	local	6.8	11.41	no
ENSRNOG00000013770	1	81.4939	90.5488	99.6037	124.174	139.721	159.835	local	7.96	24.08	no
ENSRNOG00000015368	1	100.61	112.683	134.817	162.06	183	216.92	local	7.3	19.96	no
ENSRNOG00000015605	1	0	16.0976	30.1829	3	19.835	31.9446	local	5.61	12.11	no
ENSRNOG00000015976	1	63.3841	71.4329	76.4634	93.8552	103.916	116.2	local	10.87	10.79	no
ENSRNOG00000016090	1	69.4207	78.4756	89.5427	101.401	120.058	137.469	local	6.34	17.58	no
ENSRNOG00000016218	1	108.659	122.744	131.799	176.833	198.418	212.294	local	9.1	7.89	no
ENSRNOG00000016358	1	72.439	84.5122	107.652	107.088	128.377	175.291	local	7.34	4.49	no
ENSRNOG00000016603	1	51.311	55.3354	69.4207	66.4258	81.5884	101.401	local	7.57	4.71	yes
ENSRNOG00000016608	1	42.2561	51.311	65.3963	46.2954	66.4258	96.3704	local	6.82	10.4	yes
ENSRNOG00000017174	1	16.0976	44.2683	53.3232	19.835	49.2346	75.3377	local	6.76	15.46	yes
ENSRNOG00000017406	1	146.89	160.976	165	234.432	252.691	257	local	5.89	10.67	no
ENSRNOG00000017679	1	97.5915	104.634	113.689	155.385	170.665	184.542	local	5.64	10.17	no
ENSRNOG00000017810	1	110.671	117.713	130.793	179.916	190.709	210.752	local	12.89	29.01	no
ENSRNOG00000017851	1	62.378	65.3963	67.4085	92.5976	96.3704	98.8857	local	29.12	33.13	yes
ENSRNOG00000017872	1	107.652	115.701	151.921	175.291	187.625	240.953	local	7.96	13.62	no
ENSRNOG00000018616	1	40.2439	48.2927	55.3354	43.3563	55.1129	81.5884	local	8.83	13.84	yes
ENSRNOG00000018944	1	134.817	149.909	163.994	216.92	238.344	256.603	local	6.56	14.57	no
ENSRNOG00000019138	1	50.3049	64.3902	71.4329	62.0751	95.1128	103.916	local	6.24	14.99	yes
ENSRNOG00000019338	1	54.3293	56.3415	60.3659	79.0732	84.1037	90.0823	local	36.84	66.21	yes
ENSRNOG00000019578	1	51.311	55.3354	60.3659	66.4258	81.5884	90.0823	local	24.27	13.29	yes
ENSRNOG00000019949	1	40.2439	51.311	55.3354	43.3563	66.4258	81.5884	local	6.51	8.22	yes
ENSRNOG00000020102	1	47.2866	52.3171	69.4207	53.6433	70.7765	101.401	local	7.35	4.05	yes
ENSRNOG00000020495	1	50.3049	55.3354	62.378	62.0751	81.5884	92.5976	local	11.17	17.99	yes
ENSRNOG00000020498	1	51.311	55.3354	67.4085	66.4258	81.5884	98.8857	local	9.86	8.42	yes
ENSRNOG00000020623	1	56.3415	62.378	68.4146	84.1037	92.5976	100.143	local	16.69	13.12	yes
ENSRNOG00000020867	1	51.311	57.3476	66.4024	66.4258	86.3095	97.628	local	5.42	3.02	yes
ENSRNOG00000020883	1	61.372	65.3963	70.4268	91.3399	96.3704	102.659	local	15.74	36.89	yes
ENSRNOG00000021079	1	44.2683	52.3171	63.3841	49.2346	70.7765	93.8552	local	6.63	8.32	yes
ENSRNOG00000021087	1	55.3354	57.3476	61.372	81.5884	86.3095	91.3399	local	23.3	17.99	yes
ENSRNOG00000021106	1	50.3049	57.3476	63.3841	62.0751	86.3095	93.8552	local	5.52	1.36	yes
ENSRNOG00000021474	1	60.3659	65.3963	69.4207	90.0823	96.3704	101.401	local	21.57	48.34	yes
ENSRNOG00000022595	1	66.4024	71.4329	76.4634	97.628	103.916	116.2	distant	17.31	37.63	no
ENSRNOG00000023985	1	63.3841	72.439	82.5	93.8552	107.088	125.56	local	6.43	13.51	no
ENSRNOG00000024460	1	75.4573	80.4878	87.5305	113.922	122.802	132.964	local	15.85	31.97	no
ENSRNOG00000026109	1	59.3598	65.3963	69.4207	88.8247	96.3704	101.401	local	12.69	15.99	yes
ENSRNOG00000026861	1	49.2988	55.3354	71.4329	57.7245	81.5884	103.916	local	10.55	24.59	yes
ENSRNOG00000028041	1	35.2134	47.2866	63.3841	36.4302	53.6433	93.8552	local	6.1	15.27	yes
ENSRNOG00000029957	1	43.2622	49.2988	56.3415	47.765	57.7245	84.1037	local	7	16.94	yes
ENSRNOG00000031439	1	50.3049	55.3354	67.4085	62.0751	81.5884	98.8857	distant	15.07	14.64	yes
ENSRNOG00000033045	1	62.378	68.4146	80.4878	92.5976	100.143	122.802	distant	6.66	8.34	yes
ENSRNOG00000033729	1	55.3354	64.3902	76.4634	81.5884	95.1128	116.2	local	7.15	14.98	yes
ENSRNOG00000036760	1	101.616	111.677	137.835	164.285	181.458	221.545	local	8.49	24.31	no
ENSRNOG00000036790	1	99.6037	104.634	114.695	159.835	170.665	186.083	local	6.16	5.56	no
ENSRNOG00000040145	1	0	9.0549	16.0976	3	12.5415	19.835	local	6.36	8.58	no
ENSRNOG00000042285	1	45.2744	53.3232	60.3659	50.7042	75.3377	90.0823	local	5.28	12.83	yes
ENSRNOG00000043245	1	42.2561	49.2988	53.3232	46.2954	57.7245	75.3377	local	8.99	23.74	yes
ENSRNOG00000043433	1	27.1646	33.2012	38.2317	29.3497	34.5395	40.5729	distant	9.36	22.71	no
ENSRNOG00000005082	1	45.2744	52.3171	56.3415	50.7042	70.7765	84.1037	distant	5.38	11.24	no
ENSRNOG00000009372	2	83.5608	100.676	123.831	159.522	203.491	227.848	local	6.82	16.64	no
ENSRNOG00000010183	2	82.5541	93.6284	102.689	157.508	187.404	207.573	local	9.53	23.05	no
ENSRNOG00000010263	2	56.3784	66.4459	77.5203	92.7366	120.475	144.701	local	5.32	12.7	no
ENSRNOG00000010280	2	0	1.0068	14.0946	9	11.4162	33.9013	local	6.95	18.29	no
ENSRNOG00000010483	2	80.5405	88.5946	109.737	151.502	172.355	214.483	local	5.38	12.79	no
ENSRNOG00000010799	2	83.5608	91.6149	103.696	159.522	181.385	208.755	local	6.09	11.12	no
ENSRNOG00000011441	2	51.3446	57.3851	63.4257	80.9554	95.0929	113.014	local	10.55	14.28	no
ENSRNOG00000012414	2	0	8.0541	27.1824	9	27.5798	45.5382	local	5.39	18.08	no
ENSRNOG00000012873	2	80.5405	84.5676	92.6216	151.502	161.535	184.394	local	12.54	27	no
ENSRNOG00000013434	2	61.4122	85.5743	95.6419	106.844	163.549	193.288	local	6.91	18.6	no
ENSRNOG00000013476	2	120.811	126.851	131.885	224.984	230.939	237.231	local	10.22	24.72	no
ENSRNOG00000013572	2	75.5068	82.5541	86.5811	140.296	157.508	166.335	local	9.67	24.89	no
ENSRNOG00000014232	2	70.473	82.5541	87.5878	129.285	157.508	169.345	local	7.45	14.32	no
ENSRNOG00000014355	2	101.682	119.804	131.885	205.532	224.03	237.231	local	6.52	10.9	no
ENSRNOG00000014506	2	14.0946	27.1824	36.2432	33.9013	45.5382	53.3364	distant	5.82	7.23	no
ENSRNOG00000016163	2	43.2905	49.3311	57.3851	63.0518	76.243	95.0929	local	6.77	12.95	no
ENSRNOG00000016164	2	72.4865	81.5473	107.723	133.689	155.097	212.573	local	8.56	21.6	no
ENSRNOG00000016168	2	80.5405	86.5811	116.784	151.502	166.335	221.166	local	5.76	15.88	no
ENSRNOG00000017413	2	40.2703	45.3041	60.4054	56.8023	67.4184	103.758	local	6.45	15.85	no
ENSRNOG00000018681	2	64.4324	71.4797	100.676	116.071	131.487	203.491	local	6.11	8.98	no
ENSRNOG00000018798	2	73.4932	86.5811	96.6486	135.892	166.335	195.328	local	6.32	6.46	no
ENSRNOG00000019221	2	88.5946	101.682	114.77	172.355	205.532	219.256	local	9.81	21.4	no
ENSRNOG00000020255	2	84.5676	90.6081	116.784	161.535	178.375	221.166	local	6.06	4.24	no
ENSRNOG00000020360	2	91.6149	100.676	115.777	181.385	203.491	220.211	local	7.16	16.18	no
ENSRNOG00000021068	2	78.527	90.6081	108.73	146.903	178.375	213.528	local	5.67	10.93	no
ENSRNOG00000021155	2	76.5135	82.5541	101.682	142.498	157.508	205.532	local	5.75	15.25	no
ENSRNOG00000025462	2	0	11.0743	19.1284	9	30.7406	38.6064	local	10.08	19.95	no
ENSRNOG00000029726	2	96.6486	103.696	117.79	195.328	208.755	222.12	local	7.11	19.34	no
ENSRNOG00000033560	2	83.5608	95.6419	102.689	159.522	193.288	207.573	local	6.92	18.61	no
ENSRNOG00000000489	3	92.7797	109.924	119	140.896	161.04	171	distant	5.6	3.19	no
ENSRNOG00000001517	3	36.3051	45.3814	51.4322	41.4237	53.891	61.9101	local	11.76	31.24	no
ENSRNOG00000004755	3	34.2881	41.3475	49.4153	39.5403	48.427	59.2371	local	5.89	13.61	no
ENSRNOG00000004763	3	69.5847	76.6441	84.7119	107.962	121.366	131.416	local	9.38	9.3	no
ENSRNOG00000004912	3	50.4237	54.4576	60.5085	60.5736	70.1441	85.2712	local	16.34	39.65	no
ENSRNOG00000005039	3	49.4153	52.4407	58.4915	59.2371	65.1017	80.2288	local	17.49	18.25	no
ENSRNOG00000005348	3	37.3136	54.4576	69.5847	42.8244	70.1441	107.962	local	9.8	26.7	no
ENSRNOG00000007415	3	5.0424	13.1102	24.2034	9.264	18.5284	30.9409	local	6.33	13.24	no
ENSRNOG00000007765	3	49.4153	52.4407	56.4746	59.2371	65.1017	75.1864	local	9.93	29.41	no
ENSRNOG00000007979	3	29.2458	47.3983	60.5085	35.2406	56.564	85.2712	local	5.81	16.55	no
ENSRNOG00000010729	3	56.4746	67.5678	79.6695	75.1864	102.919	125.492	local	7.54	20.28	no
ENSRNOG00000011028	3	78.661	95.8051	116.983	124.307	144.451	169.335	local	5.9	12.66	no
ENSRNOG00000011202	3	111.941	117.992	119	163.41	170.52	171	local	10.53	8.67	no
ENSRNOG00000011379	3	61.5169	75.6356	90.7627	87.7924	119.853	138.526	local	5.3	5.29	no
ENSRNOG00000012811	3	62.5254	72.6102	78.661	90.3136	115.315	124.307	local	5.78	14.1	no
ENSRNOG00000014152	3	67.5678	75.6356	79.6695	102.919	119.853	125.492	local	10.3	15.31	no
ENSRNOG00000016380	3	86.7288	91.7712	98.8305	133.786	139.711	148.006	local	12.21	15.66	no
ENSRNOG00000016636	3	93.7881	117.992	119	142.081	170.52	171	local	6.43	11.85	no
ENSRNOG00000016794	3	0	4.0339	15.1271	4	8.1059	20.8445	local	5.81	6.91	no
ENSRNOG00000017737	3	47.3983	58.4915	67.5678	56.564	80.2288	102.919	local	7.03	2.69	no
ENSRNOG00000017843	3	116.983	117.992	119	169.335	170.52	171	local	13.27	18.94	no
ENSRNOG00000018205	3	61.5169	77.6525	88.7458	87.7924	122.879	136.156	local	6.59	9.1	no
ENSRNOG00000018997	3	87.7373	92.7797	98.8305	134.971	140.896	148.006	local	10.22	14.96	no
ENSRNOG00000019339	3	8.0678	23.1949	34.2881	12.7381	30.0809	39.5403	local	5.95	10.47	no
ENSRNOG00000020493	3	89.7542	99.839	119	137.341	149.191	171	distant	6.02	7.99	no
ENSRNOG00000022586	3	0	10.0847	23.1949	4	15.0543	30.0809	local	7.39	3.71	no
ENSRNOG00000022727	3	36.3051	52.4407	78.661	41.4237	65.1017	124.307	local	5.58	15.81	no
ENSRNOG00000024808	3	23.1949	37.3136	49.4153	30.0809	42.8244	59.2371	local	6.34	0.44	no
ENSRNOG00000024852	3	65.5508	76.6441	86.7288	97.8771	121.366	133.786	local	7.83	10.7	no
ENSRNOG00000025141	3	81.6864	90.7627	111.941	127.862	138.526	163.41	local	5.42	12.42	no
ENSRNOG00000025296	3	0	0	9.0763	4	4	13.8962	local	8.53	5.68	no
ENSRNOG00000026036	3	70.5932	77.6525	83.7034	110.483	122.879	130.232	local	10.98	9.72	no
ENSRNOG00000027513	3	116.983	117.992	119	169.335	170.52	171	local	24.76	44.05	no
ENSRNOG00000031834	3	96.8136	117.992	119	145.636	170.52	171	local	7.45	6.16	no
ENSRNOG00000033091	3	34.2881	54.4576	66.5593	39.5403	70.1441	100.398	local	6.44	17.71	no
ENSRNOG00000036802	3	84.7119	95.8051	103.873	131.416	144.451	153.931	local	13.19	14.42	no
ENSRNOG00000042755	3	99.839	117.992	119	149.191	170.52	171	local	6.96	17.09	no
ENSRNOG00000001807	4	99.934	105.991	107	170.503	181.423	183	local	8.92	17.74	no
ENSRNOG00000001817	4	97.9151	103.972	105.991	167.635	176.937	181.423	local	8.38	10.76	no
ENSRNOG00000006144	4	66.6226	73.6887	81.7642	121.054	134.252	145.019	local	8.67	14.87	no
ENSRNOG00000006784	4	62.5849	68.6415	73.6887	111.675	124.855	134.252	local	9.48	0.54	no
ENSRNOG00000011667	4	0	11.1038	20.1887	4	18.0894	29.6171	local	5.68	0.25	no
ENSRNOG00000015848	4	103.972	105.991	107	176.937	181.423	183	local	5.85	15.44	no
ENSRNOG00000016246	4	69.6509	74.6981	79.7453	126.755	135.597	142.327	distant	5.67	18.95	no
ENSRNOG00000017798	4	38.3585	45.4245	56.5283	56.517	70.2372	95.7992	distant	5.71	11.29	no
ENSRNOG00000023148	4	29.2736	35.3302	40.3774	41.1447	50.4604	60.5547	distant	5.47	10.78	no
ENSRNOG00000029320	4	4.0377	20.1887	27.2547	9.1234	29.6171	38.583	local	5.5	11.01	no
ENSRNOG00000030444	4	82.7736	86.8113	92.8679	146.365	151.863	160.466	distant	22.14	51.81	no
ENSRNOG00000036680	4	44.4151	57.5377	67.6321	68.3145	98.456	122.954	distant	5.31	11.83	no
ENSRNOG00000000145	5	65.5652	80.6957	89.7739	113.689	138.348	148.834	local	7.31	14.9	no
ENSRNOG00000003049	5	74.6435	84.7304	98.8522	127.259	143.095	157.496	distant	5.33	10.07	no
ENSRNOG00000007189	5	70.6087	76.6609	81.7043	121.354	130.211	139.535	local	13.85	27.14	no
ENSRNOG00000007799	5	61.5304	72.6261	80.6957	107.449	124.306	138.348	local	10.06	16.66	no
ENSRNOG00000007837	5	61.5304	78.6783	95.8261	107.449	134.234	154.609	local	6.71	12.44	no
ENSRNOG00000008005	5	57.4957	62.5391	72.6261	100.391	109.009	124.306	local	6.42	9.31	no
ENSRNOG00000009298	5	96.8348	106.922	116	155.571	165.196	173	local	11.82	6.19	no
ENSRNOG00000009974	5	18.1565	27.2348	34.2957	31.9327	43.6764	53.9174	local	16.34	26.11	no
ENSRNOG00000010169	5	69.6	80.6957	88.7652	119.878	138.348	147.841	local	7.81	10.62	no
ENSRNOG00000010881	5	93.8087	107.93	116	152.684	166.159	173	distant	6.14	6.35	no
ENSRNOG00000011258	5	63.5478	79.687	88.7652	110.569	136.44	147.841	local	6.19	12.38	no
ENSRNOG00000014241	5	73.6348	110.957	116	125.783	169.046	173	local	7.17	6.46	no
ENSRNOG00000014642	5	110.957	114.991	116	169.046	172.896	173	local	27.78	43.7	no
ENSRNOG00000014766	5	32.2783	38.3304	50.4348	50.9914	59.8841	83.5704	local	6.53	7.95	no
ENSRNOG00000014863	5	32.2783	38.3304	46.4	50.9914	59.8841	73.9145	local	8.57	17.6	no
ENSRNOG00000015962	5	103.896	109.948	116	162.309	168.084	173	local	30.55	54.5	no
ENSRNOG00000016364	5	32.2783	40.3478	52.4522	50.9914	63.2464	88.3984	local	6.69	6.34	no
ENSRNOG00000017528	5	103.896	114.991	116	162.309	172.896	173	local	11.33	26.22	no
ENSRNOG00000017846	5	42.3652	45.3913	49.4261	66.6087	71.6522	81.1564	local	20.16	39.3	no
ENSRNOG00000017895	5	94.8174	108.939	116	153.646	167.121	173	local	5.54	3.59	no
ENSRNOG00000018118	5	100.87	114.991	116	159.421	172.896	173	local	5.62	4.07	no
ENSRNOG00000018647	5	93.8087	107.93	116	152.684	166.159	173	local	5.37	7.95	no
ENSRNOG00000018700	5	81.7043	98.8522	114.991	139.535	157.496	172.896	distant	5.63	11.69	no
ENSRNOG00000019977	5	74.6435	84.7304	89.7739	127.259	143.095	148.834	local	6.61	2.81	no
ENSRNOG00000019981	5	98.8522	113.983	116	157.496	171.934	173	local	6.61	14.68	no
ENSRNOG00000023008	5	94.8174	106.922	116	153.646	165.196	173	local	6.26	9.6	no
ENSRNOG00000023152	5	89.7739	105.913	116	148.834	164.234	173	local	5.45	3.39	no
ENSRNOG00000023459	5	56.487	71.6174	85.7391	98.0543	122.83	144.281	local	7.08	9.65	no
ENSRNOG00000024763	5	95.8261	111.965	116	154.609	170.009	173	distant	5.61	1.67	no
ENSRNOG00000024953	5	1.0087	5.0435	29.2522	3.0973	11.4864	46.6024	local	10.89	18	no
ENSRNOG00000025034	5	103.896	114.991	116	162.309	172.896	173	local	9.02	11.69	no
ENSRNOG00000026447	5	95.8261	108.939	116	154.609	167.121	173	local	7.59	6.41	no
ENSRNOG00000026646	5	78.6783	94.8174	112.974	134.234	153.646	170.971	local	5.84	12.12	no
ENSRNOG00000026840	5	103.896	114.991	116	162.309	172.896	173	local	9.24	19.65	no
ENSRNOG00000027253	5	45.3913	53.4609	66.5739	71.6522	90.8123	115.248	distant	5.54	10.14	no
ENSRNOG00000028583	5	64.5565	77.6696	81.7043	112.129	132.027	139.535	distant	7.81	21.11	no
ENSRNOG00000029339	5	75.6522	84.7304	104.904	128.735	143.095	163.271	distant	6.69	17.42	no
ENSRNOG00000030585	5	77.6696	96.8348	111.965	132.027	155.571	170.009	distant	6.24	16.91	no
ENSRNOG00000043513	5	74.6435	78.6783	80.6957	127.259	134.234	138.348	local	26.36	53.22	no
ENSRNOG00000001172	6	54.5684	70.7368	79.8316	85.0481	111.912	122.257	distant	5.94	6.9	no
ENSRNOG00000003831	6	76.8	83.8737	96	118.832	126.749	144	local	9.78	17.59	no
ENSRNOG00000004004	6	68.7158	81.8526	91.9579	109.605	124.503	135.731	local	6.93	8.32	no
ENSRNOG00000004526	6	0	6.0632	39.4105	12	4.7242	54.1928	local	5.63	8.56	no
ENSRNOG00000004542	6	83.8737	94.9895	96	126.749	141.492	144	local	5.73	8.39	no
ENSRNOG00000005087	6	0	11.1158	25.2632	12	19.3947	37.0789	local	6.19	11.22	no
ENSRNOG00000005286	6	40.4211	51.5368	57.6	55.4418	77.1396	92.9565	local	8.97	14.71	no
ENSRNOG00000005289	6	0	9.0947	22.2316	12	10.7321	33.2895	local	5.37	14.04	no
ENSRNOG00000006388	6	53.5579	58.6105	66.6947	82.4119	95.5927	107.298	local	15.8	31.95	no
ENSRNOG00000006472	6	56.5895	66.6947	75.7895	90.3204	107.298	117.678	local	7.11	9.46	no
ENSRNOG00000006699	6	54.5684	64.6737	77.8105	85.0481	104.992	119.985	local	6.67	14.2	no
ENSRNOG00000007001	6	51.5368	67.7053	77.8105	77.1396	108.452	119.985	local	8.21	12.6	no
ENSRNOG00000007254	6	54.5684	70.7368	76.8	85.0481	111.912	118.832	local	7.72	16.44	no
ENSRNOG00000007660	6	57.6	61.6421	67.7053	92.9565	101.532	108.452	local	20.67	25.82	no
ENSRNOG00000008291	6	2.0211	7.0737	10.1053	9.5747	3.5116	15.6316	local	13.14	31.63	no
ENSRNOG00000009166	6	73.7684	86.9053	96	115.372	130.117	144	local	6.64	3.92	no
ENSRNOG00000009730	6	65.6842	82.8632	94.9895	106.145	125.626	141.492	distant	5.57	9.91	no
ENSRNOG00000009967	6	8.0842	14.1474	29.3053	5.8325	23.1842	41.9668	local	6.69	6.94	no
ENSRNOG00000011164	6	58.6105	68.7158	77.8105	95.5927	109.605	119.985	local	9.3	6.14	no
ENSRNOG00000025317	6	0	9.0947	19.2	12	10.7321	29.5	local	8.36	15.2	no
ENSRNOG00000027960	6	64.6737	72.7579	78.8211	104.992	114.218	121.135	local	16.16	35.39	no
ENSRNOG00000029637	6	65.6842	70.7368	75.7895	106.145	111.912	117.678	local	22.92	43.34	no
ENSRNOG00000029871	6	56.5895	67.7053	77.8105	90.3204	108.452	119.985	local	7.55	17.32	no
ENSRNOG00000032391	6	83.8737	92.9684	96	126.749	136.854	144	local	10.87	17.73	no
ENSRNOG00000033090	6	2.0211	12.1263	19.2	9.5747	20.6579	29.5	local	12.19	27.93	no
ENSRNOG00000033206	6	56.5895	66.6947	78.8211	90.3204	107.298	121.135	local	7.41	16.25	no
ENSRNOG00000033887	6	45.4737	55.5789	74.7789	63.7375	87.6842	116.525	local	9.34	21.51	no
ENSRNOG00000040266	6	1.0105	11.1158	21.2211	10.7874	19.3947	32.0263	local	5.66	16.9	no
ENSRNOG00000042333	6	58.6105	73.7684	83.8737	95.5927	115.372	126.749	local	8.48	20.29	no
ENSRNOG00000042932	6	8.0842	12.1263	20.2105	5.8325	20.6579	30.7632	local	11.83	22.13	no
ENSRNOG00000002642	7	0	0	4.037	2	2	20.4085	local	12.48	11.24	no
ENSRNOG00000003076	7	0	14.1296	26.2407	2	32.4298	42.2592	local	7.24	15.59	no
ENSRNOG00000003964	7	58.537	65.6019	74.6852	77.4305	91.243	105.776	local	11.82	27.4	no
ENSRNOG00000004089	7	49.4537	61.5648	76.7037	61.9907	83.6163	109.004	local	5.31	16.82	no
ENSRNOG00000004229	7	48.4444	55.5093	60.5556	60.5065	71.2447	81.5544	local	6.8	8.84	no
ENSRNOG00000004793	7	0	0	18.1667	2	2	35.7063	local	10.48	9.19	no
ENSRNOG00000004962	7	0	2.0185	13.1204	2	11.8198	31.4186	local	9.09	21.02	no
ENSRNOG00000005350	7	0	4.037	11.1019	2	20.4085	28.9719	local	14.61	34.65	no
ENSRNOG00000005425	7	0	1.0093	19.1759	2	6.9099	36.5254	local	14.64	33.22	no
ENSRNOG00000005437	7	47.4352	55.5093	65.6019	59.4604	71.2447	91.243	local	5.6	9.07	no
ENSRNOG00000005487	7	0	12.1111	28.2593	2	30.1953	43.8974	local	5.59	15.3	no
ENSRNOG00000005975	7	48.4444	55.5093	69.6389	60.5065	71.2447	97.7022	local	5.65	2.84	no
ENSRNOG00000007003	7	62.5741	96.8889	106.981	85.6782	129.585	141.595	local	5.44	14.12	no
ENSRNOG00000008417	7	0	0	3.0278	2	2	16.7297	local	6.56	18.54	no
ENSRNOG00000009094	7	0	20.1852	47.4352	2	37.3445	59.4604	local	5.55	3	no
ENSRNOG00000010793	7	95.8796	107.991	109	128.556	142.987	143	local	7.63	0.78	no
ENSRNOG00000011489	7	0	0	13.1204	2	2	31.4186	local	9.57	3.38	no
ENSRNOG00000019147	7	74.6852	92.8519	109	105.776	125.469	143	distant	5.73	9.83	no
ENSRNOG00000030520	7	0	0	9.0833	2	2	26.5253	local	9.2	23.56	no
ENSRNOG00000030633	7	78.7222	101.935	109	111.062	134.73	143	local	6.55	2.08	no
ENSRNOG00000031081	7	0	0	3.0278	2	2	16.7297	local	7.39	16.72	no
ENSRNOG00000031233	7	70.6481	104.963	109	99.317	138.811	143	local	5.38	14.13	no
ENSRNOG00000031993	7	0	0	19.1759	2	2	36.5254	local	8.68	18.88	no
ENSRNOG00000032315	7	0	0	20.1852	2	2	37.3445	local	6.14	11.38	no
ENSRNOG00000032552	7	0	0	29.2685	2	2	44.7165	local	6.75	15.22	no
ENSRNOG00000033627	7	82.7593	100.926	109	115.178	133.701	143	local	6.03	0.42	no
ENSRNOG00000036834	7	104.963	107.991	109	138.811	142.987	143	local	11.56	23.81	no
ENSRNOG00000042094	7	103.954	107.991	109	137.419	142.987	143	local	7.22	7.95	no
ENSRNOG00000004837	8	91.9286	97.9898	99	119.037	126.83	128	local	5.55	8.15	no
ENSRNOG00000005149	8	95.9694	97.9898	99	124.232	126.83	128	local	9.36	3.84	no
ENSRNOG00000005713	8	0	0	11.1122	2	2	19.4621	local	8.68	16.8	no
ENSRNOG00000006723	8	46.4694	50.5102	56.5714	61.5394	69.7425	79.8498	local	24.51	46.73	yes
ENSRNOG00000007862	8	21.2143	36.3673	53.5408	28.8499	44.0487	75.6158	local	8.44	11.97	yes
ENSRNOG00000008924	8	18.1837	48.4898	63.6429	26.8126	65.6409	89.729	local	5.36	11.94	yes
ENSRNOG00000008984	8	45.4592	62.6327	89.9082	59.4886	88.3177	116.234	local	8.23	16.65	yes
ENSRNOG00000009993	8	19.1939	31.3163	38.3878	27.4917	38.2346	46.3744	local	12.43	23	no
ENSRNOG00000010537	8	42.4286	51.5204	61.6224	53.3362	71.7933	86.9064	local	11.08	27.7	yes
ENSRNOG00000010545	8	59.602	65.6633	72.7347	84.0837	92.5516	98.6421	local	11.58	23.79	yes
ENSRNOG00000010694	8	59.602	66.6735	76.7755	84.0837	93.9629	101.877	local	12.87	34.19	yes
ENSRNOG00000015863	8	5.051	17.1735	22.2245	9.9373	26.1334	29.5291	local	10.72	29.93	no
ENSRNOG00000015869	8	78.7959	86.8776	96.9796	103.693	112.024	125.531	local	11.25	14.12	no
ENSRNOG00000015949	8	43.4388	50.5102	61.6224	55.387	69.7425	86.9064	local	10.62	23.87	yes
ENSRNOG00000015977	8	22.2245	48.4898	62.6327	29.5291	65.6409	88.3177	local	6.54	10.87	yes
ENSRNOG00000016474	8	5.051	48.4898	76.7755	9.9373	65.6409	101.877	local	5.44	4.69	yes
ENSRNOG00000017439	8	47.4796	55.5612	63.6429	63.5901	78.4385	89.729	local	10.65	25.41	yes
ENSRNOG00000019317	8	42.4286	56.5714	64.6531	53.3362	79.8498	91.1403	local	7.56	19.86	yes
ENSRNOG00000020467	8	40.4082	50.5102	64.6531	49.2346	69.7425	91.1403	distant	6.01	14.92	yes
ENSRNOG00000020748	8	60.6122	91.9286	95.9694	85.495	119.037	124.232	local	6.71	18.69	yes
ENSRNOG00000020862	8	85.8673	91.9286	97.9898	110.621	119.037	126.83	local	6.55	7.55	no
ENSRNOG00000023540	8	30.3061	47.4796	56.5714	37.0718	63.5901	79.8498	local	9.11	18.44	yes
ENSRNOG00000024291	8	45.4592	54.551	60.6122	59.4886	77.0272	85.495	local	12.05	21.24	yes
ENSRNOG00000025372	8	41.4184	52.5306	63.6429	51.2854	73.8441	89.729	local	6.86	16.13	yes
ENSRNOG00000025676	8	96.9796	97.9898	99	125.531	126.83	128	local	16.32	23.01	no
ENSRNOG00000026178	8	41.4184	58.5918	64.6531	51.2854	82.6724	91.1403	local	7.37	15.05	yes
ENSRNOG00000027295	8	42.4286	49.5	63.6429	53.3362	67.6917	89.729	local	11.08	26.68	yes
ENSRNOG00000027880	8	84.8571	91.9286	95.9694	109.218	119.037	124.232	local	7.81	14.59	no
ENSRNOG00000029510	8	65.6633	89.9082	95.9694	92.5516	116.234	124.232	local	7.03	9.75	no
ENSRNOG00000029773	8	22.2245	35.3571	49.5	29.5291	42.8859	67.6917	local	9.64	16.89	yes
ENSRNOG00000030016	8	18.1837	29.2959	39.398	26.8126	35.909	47.5372	local	10.18	24.32	no
ENSRNOG00000030449	8	45.4592	55.5612	75.7653	59.4886	78.4385	100.973	local	10.09	20.61	yes
ENSRNOG00000037947	8	46.4694	55.5612	60.6122	61.5394	78.4385	85.495	local	16.88	38.84	yes
ENSRNOG00000042726	8	65.6633	68.6939	73.7449	92.5516	95.5338	99.4192	local	28.02	53.86	no
ENSRNOG00000018700	8	76.7755	86.8776	93.949	101.877	112.024	122.282	eQTL	5.55	12.72	no
ENSRNOG00000006660	9	69.8118	73.8588	74.8706	88.0487	93.7725	95.0088	distant	25.29	37.6	no
ENSRNOG00000012180	9	0	1.0118	9.1059	2	3.2818	13.5362	local	6.74	11.58	no
ENSRNOG00000015354	9	34.4	43.5059	53.6235	45.5811	57.1172	69.9352	local	14.93	33.92	no
ENSRNOG00000016470	9	68.8	72.8471	74.8706	86.6	93.098	95.0088	local	18.94	24.26	no
ENSRNOG00000017129	9	53.6235	63.7412	78.9176	69.9352	81.5412	101.097	local	8.1	19.28	no
ENSRNOG00000017206	9	51.6	66.7765	82.9647	67.3716	84.5765	107.186	local	6.36	16.59	no
ENSRNOG00000019294	9	52.6118	58.6824	64.7529	68.6534	76.3442	82.5529	local	10.16	19.61	no
ENSRNOG00000019975	9	1.0118	12.1412	32.3765	3.2818	17.3816	43.0175	local	5.77	14.56	no
ENSRNOG00000025408	9	16.1882	29.3412	41.4824	22.5087	39.1721	54.5537	distant	5.45	6.38	no
ENSRNOG00000025970	9	43.5059	62.7294	80.9412	57.1172	80.5294	104.142	local	7.12	14.18	no
ENSRNOG00000039790	9	0	4.0471	12.1412	2	7.1272	17.3816	local	7.33	16.09	no
ENSRNOG00000002458	10	60.6316	65.6842	72.7579	72.3555	78.9689	87.2149	local	16.97	33.09	no
ENSRNOG00000002610	10	0	1.0105	8.0842	4	5.2215	13.7721	local	13.81	16.57	no
ENSRNOG00000002615	10	0	0	23.2421	4	4	25.7285	local	5.98	2.84	no
ENSRNOG00000002818	10	55.5789	75.7895	84.8842	65.7421	89.7412	97.3202	local	6.94	9.29	no
ENSRNOG00000002928	10	30.3158	42.4421	49.5158	31.6435	46.8794	57.806	local	6.58	5.15	no
ENSRNOG00000003147	10	30.3158	34.3579	40.4211	31.6435	35.0402	43.7121	local	20.25	14.33	no
ENSRNOG00000003177	10	11.1158	23.2421	32.3368	16.5292	25.7285	33.3419	local	6.22	5.15	no
ENSRNOG00000003232	10	68.7158	78.8211	88.9263	82.7953	92.2675	100.689	local	9.62	11.06	no
ENSRNOG00000003256	10	18.1895	27.2842	34.3579	21.8955	29.096	35.0402	local	11.56	10.45	no
ENSRNOG00000003276	10	35.3684	42.4421	58.6105	35.8894	46.8794	69.7101	local	5.94	2.55	no
ENSRNOG00000003326	10	0	0	8.0842	4	4	13.7721	local	8.34	11.31	no
ENSRNOG00000003349	10	29.3053	34.3579	39.4105	30.7943	35.0402	42.1284	local	13.85	28.03	no
ENSRNOG00000003397	10	39.4105	47.4947	58.6105	42.1284	54.7977	69.7101	local	7.71	18.91	no
ENSRNOG00000003661	10	76.8	86.9053	93.9789	90.5833	99.0044	104.899	local	11.36	23.88	no
ENSRNOG00000003721	10	0	9.0947	16.1684	4	14.9936	20.3623	local	7.28	6.24	no
ENSRNOG00000003905	10	68.7158	80.8421	88.9263	82.7953	93.9518	100.689	local	9.04	7.02	no
ENSRNOG00000004295	10	71.7474	83.8737	96	86.1637	96.4781	106	local	6.24	13.85	no
ENSRNOG00000004741	10	69.7263	74.7789	81.8526	83.9181	88.8991	94.7939	local	15.21	12.63	no
ENSRNOG00000005659	10	38.4	52.5474	61.6421	40.5448	61.774	73.6781	local	7.46	18.6	no
ENSRNOG00000007454	10	36.3789	42.4421	47.4947	37.3775	46.8794	54.7977	local	7.8	12.06	no
ENSRNOG00000007606	10	55.5789	64.6737	73.7684	65.7421	77.6462	88.057	local	9.04	11.21	no
ENSRNOG00000007869	10	44.4632	52.5474	60.6316	50.0467	61.774	72.3555	local	9.3	5.33	no
ENSRNOG00000010320	10	38.4	44.4632	62.6526	40.5448	50.0467	75.0008	local	5.73	4.13	no
ENSRNOG00000013038	10	69.7263	73.7684	78.8211	83.9181	88.057	92.2675	distant	14.69	33.25	no
ENSRNOG00000014354	10	69.7263	73.7684	83.8737	83.9181	88.057	96.4781	local	6.38	16.25	no
ENSRNOG00000015787	10	64.6737	76.8	88.9263	77.6462	90.5833	100.689	local	6.27	14.41	no
ENSRNOG00000016475	10	61.6421	72.7579	82.8632	73.6781	87.2149	95.636	local	8.83	20.93	no
ENSRNOG00000016545	10	0	10.1053	22.2316	4	15.7626	24.9619	local	7.03	12.81	no
ENSRNOG00000016774	10	0	9.0947	15.1579	4	14.9936	19.5956	local	6.9	1.92	no
ENSRNOG00000016924	10	68.7158	73.7684	84.8842	82.7953	88.057	97.3202	local	6.02	7.43	no
ENSRNOG00000017781	10	68.7158	73.7684	82.8632	82.7953	88.057	95.636	local	6.48	7.07	no
ENSRNOG00000018526	10	41.4316	51.5368	58.6105	45.2958	60.4514	69.7101	local	8.99	3.51	no
ENSRNOG00000019308	10	37.3895	50.5263	59.6211	38.9611	59.1287	71.0328	local	5.91	9.66	no
ENSRNOG00000021412	10	51.5368	60.6316	67.7053	60.4514	72.3555	81.6142	local	12.13	21.92	no
ENSRNOG00000024445	10	0	8.0842	21.2211	4	13.7721	24.1953	local	8.29	7.55	no
ENSRNOG00000024535	10	38.4	48.5053	57.6	40.5448	56.3814	68.3874	local	6.63	10.33	no
ENSRNOG00000028404	10	63.6632	72.7579	83.8737	76.3235	87.2149	96.4781	local	9.5	12.81	no
ENSRNOG00000028699	10	40.4211	49.5158	57.6	43.7121	57.806	68.3874	local	5.43	12	no
ENSRNOG00000033617	10	60.6316	72.7579	80.8421	72.3555	87.2149	93.9518	local	9.99	25.12	no
ENSRNOG00000038328	10	29.3053	38.4	46.4842	30.7943	40.5448	53.2141	local	8.69	14.28	no
ENSRNOG00000038706	10	81.8526	89.9368	96	94.7939	101.531	106	distant	5.35	1.01	no
ENSRNOG00000039002	10	16.1684	25.2632	33.3474	20.3623	27.3976	34.1911	local	10.1	26.72	no
ENSRNOG00000043295	10	61.6421	70.7368	79.8316	73.6781	85.0409	93.1096	local	9.99	22.62	no
ENSRNOG00000001766	11	44.8	51.9273	56	64.6522	75.2121	81	local	7.53	21.46	no
ENSRNOG00000001890	11	49.8909	54.9818	56	71.8182	80.303	81	local	9.53	18.8	no
ENSRNOG00000001911	11	41.7455	54.9818	56	61	80.303	81	local	6.24	18.34	no
ENSRNOG00000002145	11	34.6182	45.8182	51.9273	53.0191	65.8696	75.2121	local	9.56	26.13	no
ENSRNOG00000007152	11	32.5818	45.8182	53.9636	50.8756	65.8696	78.6061	distant	5.59	6.62	no
ENSRNOG00000007387	11	35.6364	46.8364	56	54.0909	67.087	81	distant	5.41	3.09	no
ENSRNOG00000011040	11	16.2909	25.4545	36.6545	27.8953	41.7796	55.1627	distant	9.53	23.3	no
ENSRNOG00000026458	11	48.8727	54.9818	56	70.1212	80.303	81	local	6.04	17.22	no
ENSRNOG00000027797	11	1.0182	21.3818	32.5818	7.3619	35.6088	50.8756	local	5.64	10.09	no
ENSRNOG00000031801	11	47.8545	54.9818	56	68.4242	80.303	81	local	5.8	7.66	no
ENSRNOG00000042289	11	31.5636	38.6909	44.8	49.8038	57.3478	64.6522	local	8.64	24.76	no
ENSRNOG00000043107	11	16.2909	23.4182	44.8	27.8953	38.6942	64.6522	local	5.33	8.38	no
ENSRNOG00000000939	12	0	1.0222	6.1333	8	8.8113	12.8677	local	8.18	13.5	no
ENSRNOG00000001349	12	8.1778	11.2444	14.3111	14.374	16.579	18.6819	local	23.24	45.97	no
ENSRNOG00000001353	12	1.0222	9.2	19.4222	8.8113	15.122	22.1867	local	6.6	8.86	no
ENSRNOG00000019022	12	0	4.0889	17.3778	8	11.2451	20.7848	distant	5.58	11	no
ENSRNOG00000043351	12	36.8	44.9778	46	35.5745	41.7583	42	local	6.6	1.23	no
ENSRNOG00000000657	13	14.2642	20.3774	23.434	48.0941	54.7741	59.0194	local	19.66	32.88	no
ENSRNOG00000002369	13	19.3585	22.4151	30.566	53.359	57.6043	68.8687	local	9.72	20.66	no
ENSRNOG00000002538	13	0	8.1509	21.3962	29	41.8923	56.1892	local	5.72	14.8	no
ENSRNOG00000002627	13	47.8868	52.9811	54	93.9261	101.002	102	local	6.41	5.85	no
ENSRNOG00000002775	13	19.3585	28.5283	35.6604	53.359	66.0949	76.3611	local	6.77	9.16	no
ENSRNOG00000002826	13	27.5094	40.7547	52.9811	64.6798	84.0204	101.002	local	5.76	15.63	no
ENSRNOG00000003018	13	35.6604	44.8302	54	76.3611	89.6808	102	local	7.94	15.8	no
ENSRNOG00000003291	13	35.6604	42.7925	48.9057	76.3611	86.8506	95.3412	local	17.45	39.8	no
ENSRNOG00000003308	13	33.6226	46.8679	54	73.2041	92.511	102	local	7.03	13.82	no
ENSRNOG00000003312	13	3.0566	12.2264	20.3774	34.7936	46.0268	54.7741	local	7.92	14.63	no
ENSRNOG00000003515	13	40.7547	52.9811	54	84.0204	101.002	102	local	6.12	11.23	no
ENSRNOG00000003767	13	43.8113	52.9811	54	88.2657	101.002	102	local	6.71	12.79	no
ENSRNOG00000003795	13	45.8491	52.9811	54	91.0959	101.002	102	local	6.47	7.95	no
ENSRNOG00000004162	13	2.0377	11.2075	20.3774	31.2704	44.9932	54.7741	local	6.23	16.27	no
ENSRNOG00000004424	13	0	4.0755	16.3019	29	36.704	50.1613	local	6.78	17.83	no
ENSRNOG00000004553	13	41.7736	51.9623	54	85.4355	99.5865	102	local	11.08	19.08	no
ENSRNOG00000004737	13	39.7358	48.9057	54	82.6053	95.3412	102	local	11.95	30.9	no
ENSRNOG00000005082	13	35.6604	47.8868	54	76.3611	93.9261	102	local	5.82	12.81	no
ENSRNOG00000008137	13	0	3.0566	17.3208	29	34.7936	51.195	local	9.03	9.45	no
ENSRNOG00000023130	13	48.9057	52.9811	54	95.3412	101.002	102	local	12.2	24.12	no
ENSRNOG00000027017	13	26.4906	30.566	38.717	63.2647	68.8687	81.0967	local	10.26	22.32	no
ENSRNOG00000032058	13	36.6792	41.7736	47.8868	77.9397	85.4355	93.9261	local	17.99	40.06	no
ENSRNOG00000037984	13	31.5849	40.7547	54	70.1977	84.0204	102	local	5.69	9.31	no
ENSRNOG00000000043	14	0	3.0405	16.2162	1	5.3208	24.0441	local	7.36	9.9	no
ENSRNOG00000001960	14	11.1486	23.3108	28.3784	16.8428	33.0715	39.7001	local	13.54	29.36	no
ENSRNOG00000002129	14	0	4.0541	17.2297	1	6.761	25.4844	local	6.42	19.6	no
ENSRNOG00000002158	14	0	0	5.0676	1	1	8.2013	local	7.68	20.9	no
ENSRNOG00000002345	14	0	13.1757	25.3378	1	19.7233	35.4563	local	5.3	13.82	no
ENSRNOG00000004670	14	51.6892	58.7838	66.8919	80.735	89.3225	96.6107	local	14.76	31.99	no
ENSRNOG00000005106	14	12.1622	38.5135	48.6486	18.2831	64.2703	76.7365	local	11.16	23.28	no
ENSRNOG00000006400	14	37.5	47.6351	68.9189	62.75	75.9764	98.4327	local	5.73	13.22	no
ENSRNOG00000015093	14	0	5.0676	14.1892	1	8.2013	21.1636	local	12.04	27.63	no
ENSRNOG00000027463	14	0	9.1216	28.3784	1	13.9623	39.7001	local	6.59	15.65	no
ENSRNOG00000028335	14	42.5676	52.7027	60.8108	70.3514	82.1426	91.1445	distant	5.76	14.27	no
ENSRNOG00000028498	14	42.5676	49.6622	56.7568	70.3514	77.9197	87.5005	local	7.49	4.32	no
ENSRNOG00000030216	14	0	2.027	12.1622	1	3.8805	18.2831	local	5.98	15.26	no
ENSRNOG00000031033	14	51.6892	62.8378	70.9459	80.735	92.9666	100.255	distant	5.75	8.22	no
ENSRNOG00000004516	15	63.8873	70.9859	72	93.7399	102.829	104	local	5.43	12.68	no
ENSRNOG00000008855	15	17.2394	24.338	35.493	27.6851	38.2618	60.6781	local	6.49	18.99	no
ENSRNOG00000009481	15	8.1127	12.169	16.2254	16.3752	20.1032	26.1688	local	12.1	25.63	no
ENSRNOG00000009512	15	22.3099	34.4789	51.7183	35.2671	59.5467	78.7808	local	6	19.04	no
ENSRNOG00000009982	15	13.1831	17.2394	21.2958	21.6196	27.6851	33.7507	local	17.41	28.4	no
ENSRNOG00000012325	15	0	1.0141	10.1408	9	9.9219	18.219	local	7.44	8.21	no
ENSRNOG00000022374	15	47.662	60.8451	72	74.2551	89.8443	104	distant	5.42	12.5	no
ENSRNOG00000025625	15	0	8.1127	22.3099	9	16.3752	35.2671	local	6.18	7.38	no
ENSRNOG00000026211	15	23.3239	39.5493	53.7465	36.7705	65.2038	81.0436	distant	5.86	4.89	no
ENSRNOG00000038012	15	48.6761	59.831	72	75.3865	88.5458	104	local	7.22	16.09	no
ENSRNOG00000010437	16	0	8.1311	21.3443	0	12.7222	39.8773	local	5.63	10.26	no
ENSRNOG00000010780	16	26.4262	33.541	40.6557	50.209	60.388	65.0415	local	10.86	18.33	no
ENSRNOG00000010984	16	0	0	11.1803	0	0	17.493	local	7.24	4.47	no
ENSRNOG00000011263	16	0	2.0328	10.1639	0	3.1806	15.9028	local	12.37	32	no
ENSRNOG00000011407	16	31.5082	41.6721	57.9344	57.5645	66.0443	82.0878	local	6.27	6.05	no
ENSRNOG00000011754	16	45.7377	53.8689	62	70.0551	78.0769	86	local	11.47	32.63	no
ENSRNOG00000012739	16	32.5246	47.7705	58.9508	59.0328	72.0606	83.0905	local	6.48	9.15	no
ENSRNOG00000013307	16	50.8197	58.9508	62	75.0687	83.0905	86	distant	5.75	5.02	no
ENSRNOG00000019629	16	52.8525	60.9836	62	77.0742	85.0959	86	local	9.54	7.45	no
ENSRNOG00000023972	16	52.8525	60.9836	62	77.0742	85.0959	86	local	6.59	1.82	no
ENSRNOG00000024411	16	9.1475	20.3279	25.4098	14.3125	35.2871	48.7379	local	8.12	11.29	no
ENSRNOG00000024837	16	43.7049	50.8197	58.9508	68.0497	75.0687	83.0905	local	12.34	23.64	no
ENSRNOG00000038365	16	40.6557	51.8361	60.9836	65.0415	76.0715	85.0959	local	9.24	19.4	no
ENSRNOG00000042426	16	20.3279	25.4098	29.4754	35.2871	48.7379	54.6223	local	6.58	10.35	no
ENSRNOG00000008666	17	52.8814	58.9831	60	84.0244	92.4249	93	local	17.54	35.91	no
ENSRNOG00000013438	17	7.1186	20.339	24.4068	27.6147	39.8991	44.8528	local	8.6	13.71	no
ENSRNOG00000016587	17	0	1.0169	10.1695	21	21.945	30.4495	local	8.83	8.35	no
ENSRNOG00000017577	17	6.1017	29.4915	44.7458	26.6697	51.8633	72.8379	local	6	12.68	no
ENSRNOG00000018141	17	7.1186	21.3559	41.6949	27.6147	40.844	68.643	local	5.8	14.76	no
ENSRNOG00000018343	17	0	0	9.1525	21	21	29.5046	local	10.27	18.9	no
ENSRNOG00000043108	17	51.8644	57.9661	60	82.6261	91.0222	93	local	8.21	22.1	no
ENSRNOG00000043448	17	51.8644	58.9831	60	82.6261	92.4249	93	local	8.45	22.64	no
ENSRNOG00000000157	18	17.2881	21.3559	26.4407	29.0757	43.2229	52.703	local	8.24	9.85	no
ENSRNOG00000002697	18	0	0	5.0847	1	1	8.4381	local	8.57	14.2	no
ENSRNOG00000005796	18	7.1186	17.2881	24.4068	11.5671	29.0757	48.9109	local	7.25	5.45	no
ENSRNOG00000012795	18	0	3.0508	11.1864	1	5.309	17.8253	local	6.31	14.8	no
ENSRNOG00000013867	18	2.0339	13.2203	24.4068	3.7735	20.9544	48.9109	local	5.28	13.61	no
ENSRNOG00000014970	18	38.6441	47.7966	55.9322	62.5349	69.7806	80.6938	distant	5.78	12.25	no
ENSRNOG00000017067	18	39.661	47.7966	56.9492	63.34	69.7806	82.3519	local	13.17	30.83	no
ENSRNOG00000017091	18	6.1017	13.2203	19.322	10.0026	20.9544	37.0128	local	8.95	8.81	no
ENSRNOG00000017718	18	10.1695	16.2712	22.3729	16.2608	25.648	45.1189	local	5.33	13.69	no
ENSRNOG00000017840	18	5.0847	15.2542	23.3898	8.4381	24.0834	47.0149	local	6.56	16.73	no
ENSRNOG00000018053	18	11.1864	37.6271	54.9153	17.8253	61.7298	79.0357	local	5.72	10.1	no
ENSRNOG00000018680	18	52.8814	56.9492	60	75.7196	82.3519	87	local	16.61	22.16	no
ENSRNOG00000019063	18	17.2881	51.8644	58.9831	29.0757	74.0615	85.668	local	6.21	11.93	no
ENSRNOG00000019276	18	9.1525	19.322	23.3898	14.6962	37.0128	47.0149	local	14.17	14.19	no
ENSRNOG00000019826	18	7.1186	18.3051	25.4237	11.5671	33.0442	50.807	local	8.2	12.35	no
ENSRNOG00000026616	18	35.5932	43.7288	55.9322	60.1196	66.5603	80.6938	distant	6.71	6.47	no
ENSRNOG00000027271	18	48.8136	55.9322	58.9831	70.5857	80.6938	85.668	distant	15.41	33.66	no
ENSRNOG00000029262	18	52.8814	55.9322	58.9831	75.7196	80.6938	85.668	distant	16.24	31.82	no
ENSRNOG00000030388	18	8.1356	14.2373	21.3559	13.1317	22.5189	43.2229	local	13.06	30.99	no
ENSRNOG00000031197	18	0	0	6.1017	1	1	10.0026	local	6.82	9.57	no
ENSRNOG00000034126	18	8.1356	14.2373	20.339	13.1317	22.5189	40.9814	local	13.05	25.81	no
ENSRNOG00000039415	18	6.1017	18.3051	36.6102	10.0026	33.0442	60.9247	local	6.9	9.91	no
ENSRNOG00000039455	18	3.0508	19.322	25.4237	5.309	37.0128	50.807	local	7.36	19.42	no
ENSRNOG00000039463	18	11.1864	18.3051	22.3729	17.8253	33.0442	45.1189	local	16.06	37.48	no
ENSRNOG00000043440	18	52.8814	56.9492	58.9831	75.7196	82.3519	85.668	distant	19.37	35.48	no
ENSRNOG00000012622	19	0	11.1746	28.4444	0	14.3915	33.7005	local	6.61	1.94	no
ENSRNOG00000015150	19	47.746	60.9524	64	45.0012	52.9164	55	local	6.14	0.31	no
ENSRNOG00000025764	19	0	9.1429	18.2857	0	11.7749	27.7528	local	5.42	5.91	no
ENSRNOG00000026588	19	2.0317	11.1746	17.2698	2.6166	14.3915	27.158	distant	8.09	22.07	no
ENSRNOG00000026840	19	11.1746	16.254	26.4127	14.3915	25.6589	31.918	distant	5.5	13.88	no
ENSRNOG00000000279	20	35.814	42.9767	44	42.221	48.6218	49	local	7.67	17.91	no
ENSRNOG00000000565	20	16.3721	30.6977	44	24.2066	37.649	49	local	6.59	10.57	no
ENSRNOG00000000568	20	16.3721	22.5116	29.6744	24.2066	30.3338	36.7346	local	13.29	14.2	no
ENSRNOG00000000636	20	5.1163	11.2558	18.4186	14.3787	18.7052	26.4071	local	6.93	18.35	no
ENSRNOG00000001168	20	0	2.0465	17.3953	11	12.3515	25.3068	local	6.46	14.57	no
ENSRNOG00000006844	20	0	2.0465	10.2326	11	12.3515	17.7573	distant	6.03	11.29	no
ENSRNOG00000008400	20	26.6047	35.814	44	33.9914	42.221	49	distant	5.76	9.3	no
ENSRNOG00000026049	20	30.6977	42.9767	44	37.649	48.6218	49	local	6.59	12.49	no
ENSRNOG00000043436	20	13.3023	18.4186	30.6977	20.9057	26.4071	37.649	local	12.11	8.07	no
