# Supplementary material for: Genetic Influences on Brain Gene Expression in Rats Selected for Tameness and Aggression
Source: Oxford University Press journal article supplement (doi:10.1534/genetics.114.168948), 2014-09-03
Supplement: tables4.xlsx [file tables4.xlsx]

## Sheet: Sheet1
ensembl_gene_ID	eQTL_chr	eQTL_start_cM	eQTL_peak_cM	eQTL_end_cM	eQTL_start_Mb	eQTL_peak_Mb	eQTL_end_Mb	eQTL	FIA_score	eQTL_overlap_tamenessQTL	allele_effect_correlation_at_tamenessQTLpeaks_cor_coeff	allele_effect_correlation_at_tamenessQTLpeaks_p_value	allele_effect_correlation_at_tamenessQTLpeaks_p_value_adjusted	allele_effect_correlation_at_eQTLpeaks_cor_coeff	allele_effect_correlation_at_eQTLpeaks_p_value	allele_effect_correlation_at_eQTLpeaks_p_value_adjusted
ENSRNOG00000009173	1	106.493	120	133.507	173.514	194.213	214.912	distant	196.259	no	NA	NA	NA	-0.484707	0.186034	0.508641
ENSRNOG00000036760	1	104.109	112	119.891	169.798	181.953	194.047	local	894.883	no	NA	NA	NA	0.275588	0.50884	0.777364
ENSRNOG00000029957	1	40.6451	52	63.3549	43.9422	69.4054	93.8187	local	351.041	yes	0.908171	0.001805	0.02014	0.871128	0.0022253	0.0589704
ENSRNOG00000010529	1	42.562	56	69.438	46.7423	83.25	101.422	local	199.957	yes	-0.718309	0.0447398	0.149824	-0.803638	0.0294316	0.210814
ENSRNOG00000021474	1	61	66	71	90.875	97.125	103.375	local	2320.46	yes	0.896621	0.00255239	0.0231021	0.901903	0.0054876	0.0882866
ENSRNOG00000015368	1	104.722	114	123.278	170.8	185.018	199.236	local	615.246	no	NA	NA	NA	-0.0526025	0.893086	0.957165
ENSRNOG00000033189	1	40.4919	54	67.5081	43.7185	78.25	99.0101	local	196.204	yes	-0.757839	0.0293665	0.112672	-0.757839	0.0293665	0.210814
ENSRNOG00000019338	1	53	58	63	73.8462	87.125	93.375	local	4127.08	yes	-0.846635	0.00801274	0.0530844	-0.969529	0.000306224	0.0298765
ENSRNOG00000042947	1	100.054	112	123.946	160.831	181.953	200.26	local	299.238	no	NA	NA	NA	0.0599599	0.887844	0.95582
ENSRNOG00000020883	1	62.2207	68	73.7793	92.4008	99.625	110.123	local	1583.41	yes	-0.987648	4.66737739236443e-06	0.000790929	-0.862904	0.012398	0.127496
ENSRNOG00000011411	1	0	8	20.1462	3	11.3721	23.3157	local	283.473	no	NA	NA	NA	0.563997	0.0707315	0.316455
ENSRNOG00000020666	1	128.608	142	155.392	207.404	227.927	245.453	local	202.43	no	NA	NA	NA	0.0145958	0.970271	0.983525
ENSRNOG00000023985	1	61.3708	74	86.6292	91.3385	110.623	131.341	local	248.791	yes	0.590293	0.12343	0.284419	0.947539	0.000346896	0.0298765
ENSRNOG00000011409	1	0	10	23.9	3	13.6667	26.543	local	176.489	no	NA	NA	NA	0.289551	0.387781	0.68821
ENSRNOG00000013767	1	42.0039	56	69.9961	45.927	83.25	102.12	local	171.968	yes	0.812062	0.0143441	0.0844709	0.90174	0.0055099	0.0882866
ENSRNOG00000013123	1	92.0718	106	119.928	143.131	172.758	194.103	local	175.151	no	NA	NA	NA	0.115593	0.750492	0.914172
ENSRNOG00000028041	1	41.2519	52	62.7481	44.8287	69.4054	93.0601	local	413.578	yes	0.703702	0.0514365	0.15514	0.838069	0.00478371	0.0845121
ENSRNOG00000018616	1	38.4928	48	57.5072	40.9313	54.6854	86.509	local	578.338	yes	0.814686	0.0137805	0.0834703	0.798535	0.0098619	0.117153
ENSRNOG00000013702	1	95.9581	106	116.042	151.773	172.758	188.147	local	500.518	no	NA	NA	NA	0.338889	0.338112	0.645316
ENSRNOG00000033729	1	56.2637	68	79.7363	83.9093	99.625	121.777	local	316.666	yes	-0.963107	0.000122085	0.00431366	-0.877157	0.00949812	0.116196
ENSRNOG00000043245	1	40.0074	50	59.9926	43.0108	60.7568	89.6158	local	507.232	yes	-0.923122	0.00107143	0.0133614	-0.883096	0.00365214	0.0752229
ENSRNOG00000016608	1	38.4414	50	61.5586	40.8607	60.7568	91.5733	local	332.243	yes	0.963455	0.0001187	0.00431366	0.962103	0.000132231	0.0298765
ENSRNOG00000011675	1	47	52	57	53.2247	69.4054	85.75	local	2370.92	yes	0.871645	0.00479073	0.0376161	0.912418	0.000600357	0.0379751
ENSRNOG00000017810	1	112.684	120	127.316	183.002	194.213	205.424	local	1045.43	no	NA	NA	NA	-0.319337	0.40223	0.70045
ENSRNOG00000020623	1	57.9005	64	70.0995	87.0006	94.625	102.249	local	1452.95	yes	0.983553	1.09856524621588e-05	0.000790929	0.916248	0.00137798	0.0445876
ENSRNOG00000021095	1	50.8933	64	77.1067	64.6199	94.625	117.657	local	218.68	yes	-0.802956	0.0164111	0.0915566	-0.823886	0.0119157	0.124393
ENSRNOG00000021442	1	23.0614	36	48.9386	25.822	37.5098	56.1668	local	228.84	yes	0.886466	0.00335418	0.0284435	0.742024	0.0139997	0.133969
ENSRNOG00000026861	1	56.083	64	71.917	83.4576	94.625	104.521	distant	888.683	yes	0.98345	1.11923922134771e-05	0.000790929	0.928611	0.00086155	0.0380458
ENSRNOG00000013770	1	81.1923	92	102.808	123.762	142.97	166.921	local	406.976	no	NA	NA	NA	-0.763424	0.0101844	0.118934
ENSRNOG00000017508	1	35.4411	48	60.5589	36.7427	54.6854	90.3236	local	253.559	yes	-0.72073	0.0436839	0.149371	-0.467129	0.204877	0.528691
ENSRNOG00000012698	1	71.0886	82	92.9114	103.486	124.864	145.011	local	395.724	no	NA	NA	NA	0.832282	0.0103606	0.118974
ENSRNOG00000013965	1	142.159	156	164	228.171	246.241	256.611	local	179.319	no	NA	NA	NA	-0.126522	0.765291	0.920547
ENSRNOG00000017872	1	125.272	134	142.728	202.293	215.668	229.036	local	713.865	no	NA	NA	NA	0.0837491	0.830382	0.94331
ENSRNOG00000019406	1	49.2763	62	74.7237	57.6272	92.125	112.261	local	242.517	yes	0.526626	0.179951	0.346815	0.581837	0.130265	0.451017
ENSRNOG00000016090	1	67.2501	80	92.7499	98.6876	122.136	144.649	local	240.807	no	NA	NA	NA	-0.810712	0.0146395	0.138173
ENSRNOG00000012196	1	135.915	148	160.085	218.602	235.87	251.537	local	288.167	no	NA	NA	NA	-0.263046	0.494072	0.766702
ENSRNOG00000011058	1	0	6	19.0581	3	9.27907	22.3803	local	221.566	no	NA	NA	NA	0.592507	0.0547527	0.283643
ENSRNOG00000015030	1	130.914	144	157.086	210.938	230.685	247.649	local	219.901	no	NA	NA	NA	0.319112	0.402581	0.70045
ENSRNOG00000014030	1	72.5869	86	99.4131	107.423	130.46	159.414	local	201.302	no	NA	NA	NA	0.833809	0.00521581	0.0876511
ENSRNOG00000019138	1	53.2424	66	78.7576	74.965	97.125	120.442	local	240.308	yes	0.930392	0.000799783	0.0123772	0.831348	0.020442	0.171633
ENSRNOG00000018944	1	147.553	158	164	235.291	248.833	256.611	local	448.591	no	NA	NA	NA	-0.441698	0.233935	0.561606
ENSRNOG00000015605	1	4.89883	16	27.1012	8.12668	19.7511	29.2951	local	375.952	no	NA	NA	NA	-0.14344	0.673936	0.889544
ENSRNOG00000033045	1	56.4463	70	83.5537	84.3658	102.125	127.035	distant	193.801	yes	-0.664906	0.0720108	0.183931	-0.912924	0.0110432	0.122854
ENSRNOG00000019949	1	41.8917	54	66.1083	45.7631	78.25	97.2604	local	286.387	yes	0.915311	0.0014237	0.016768	0.915311	0.0014237	0.0445876
ENSRNOG00000021156	1	116.425	128	139.575	188.734	206.473	224.211	local	330.751	no	NA	NA	NA	-0.424734	0.221142	0.544166
ENSRNOG00000024460	1	75.8483	82	88.1517	114.807	124.864	134.355	local	1432.49	no	NA	NA	NA	-0.873227	0.00462149	0.0837949
ENSRNOG00000036790	1	96.3125	106	115.687	152.557	172.758	187.604	local	550.81	no	NA	NA	NA	0.0644361	0.85963	0.946142
ENSRNOG00000040145	1	0	10	22.2737	3	13.6667	25.1449	local	273.867	no	NA	NA	NA	-0.294525	0.379304	0.687113
ENSRNOG00000020456	1	92.5501	106	119.45	144.202	172.758	193.37	local	199.312	no	NA	NA	NA	0.393477	0.260608	0.582953
ENSRNOG00000026109	1	58.6888	66	73.3112	87.986	97.125	109.063	local	1046.73	yes	-0.97148	5.67636164534926e-05	0.00300847	-0.81726	0.0247823	0.191854
ENSRNOG00000024410	1	52.0887	66	79.9113	69.7889	97.125	122.015	local	175.952	yes	0.0201701	0.962191	0.972941	-0.408265	0.363196	0.674507
ENSRNOG00000020411	1	106.801	120	133.199	173.986	194.213	214.44	local	213.298	no	NA	NA	NA	0.0764246	0.845065	0.946142
ENSRNOG00000017679	1	93.6463	106	118.354	146.656	172.758	191.69	local	268.013	no	NA	NA	NA	0.223073	0.535593	0.79531
ENSRNOG00000027582	1	107.851	120	132.149	175.595	194.213	212.831	local	283.259	no	NA	NA	NA	0.139841	0.71972	0.912709
ENSRNOG00000020498	1	47.221	56	64.779	53.5475	83.25	95.5988	local	704.081	yes	-0.763343	0.0275327	0.112672	-0.881626	0.00867923	0.115476
ENSRNOG00000043433	1	26.1581	36	45.8419	28.4844	37.5098	51.5331	distant	528.307	yes	0.737527	0.0367738	0.134415	0.663428	0.0364942	0.237865
ENSRNOG00000014338	1	0	4	17.6187	3	7.18605	21.1428	distant	190.426	no	NA	NA	NA	0.176457	0.60375	0.843781
ENSRNOG00000020867	1	46.6528	60	73.3472	52.7176	89.625	109.145	local	204.92	yes	0.849257	0.00762451	0.0521418	0.88918	0.00312596	0.069477
ENSRNOG00000022595	1	68.5442	74	79.4558	100.305	110.623	121.394	distant	1728.01	no	NA	NA	NA	0.958139	0.000177676	0.0298765
ENSRNOG00000016218	1	109.144	118	126.856	177.577	191.148	204.719	local	689.602	no	NA	NA	NA	-0.697622	0.0543913	0.283643
ENSRNOG00000009039	1	8.5089	22	35.4911	11.9047	24.9095	36.8113	distant	197.107	no	NA	NA	NA	0.434171	0.182113	0.507999
ENSRNOG00000017851	1	63	68	73	93.375	99.625	108.358	local	3253.59	yes	-0.931411	0.000765769	0.0123772	-0.8124	0.0263895	0.20045
ENSRNOG00000027707	1	140.555	154	164	225.713	243.648	256.611	distant	199.599	no	NA	NA	NA	0.145592	0.708592	0.909161
ENSRNOG00000021106	1	45.0871	58	70.9129	50.4305	87.125	103.266	local	230.43	yes	-0.879869	0.00395308	0.0322328	-0.879775	0.0090133	0.115476
ENSRNOG00000017097	1	106.257	120	133.743	173.153	194.213	215.273	local	184.154	no	NA	NA	NA	0.733047	0.0246389	0.191854
ENSRNOG00000017621	1	101.988	116	130.012	165.109	188.083	209.556	local	171.24	no	NA	NA	NA	0.383471	0.308306	0.621811
ENSRNOG00000010753	1	0	4	17.5995	3	7.18605	21.1263	local	191.416	no	NA	NA	NA	-0.101971	0.765449	0.920547
ENSRNOG00000004090	1	55.3138	68	80.6862	81.5344	99.625	123.072	distant	244.986	yes	-0.79167	0.0192198	0.0946	-0.840418	0.0178953	0.160501
ENSRNOG00000021087	1	55	60	65	80.75	89.625	95.875	local	2507.26	yes	-0.952219	0.000263034	0.00697041	-0.964373	0.000110054	0.0298765
ENSRNOG00000021206	1	116.009	130	143.991	188.096	209.538	230.674	local	172.185	no	NA	NA	NA	0.272717	0.445856	0.730421
ENSRNOG00000013023	1	49	54	59	56.4324	78.25	88.375	local	2309.19	yes	0.932819	0.000720346	0.0123772	0.932819	0.000720346	0.0379751
ENSRNOG00000019636	1	117.448	130	142.552	190.301	209.538	228.774	local	254.001	no	NA	NA	NA	0.0728043	0.841582	0.946142
ENSRNOG00000016603	1	47.4023	58	68.5977	53.8123	87.125	100.372	local	430.724	yes	-0.898787	0.0023993	0.0231021	-0.883394	0.00836706	0.115476
ENSRNOG00000017406	1	151.447	164	164	240.338	256.611	256.611	local	253.933	no	NA	NA	NA	-0.0044747	0.990884	0.993603
ENSRNOG00000021079	1	41.5965	54	66.4035	45.332	78.25	97.6293	local	264.436	yes	-0.895754	0.00261533	0.0231021	-0.895754	0.00261533	0.0606207
ENSRNOG00000014938	1	50.2644	64	77.7356	61.9001	94.625	119.049	local	184.507	yes	0.708459	0.049194	0.15514	0.736072	0.037344	0.237865
ENSRNOG00000013290	1	102.651	116	129.349	166.574	188.083	208.54	local	204.809	no	NA	NA	NA	-0.0891501	0.819583	0.941631
ENSRNOG00000016358	1	74.3338	86	97.6662	111.378	130.46	155.55	local	322.723	no	NA	NA	NA	-0.790258	0.0112561	0.123102
ENSRNOG00000017510	1	78.3199	92	105.68	119.845	142.97	172.268	local	187.296	no	NA	NA	NA	0.778148	0.00802927	0.115253
ENSRNOG00000020495	1	49.6004	58	66.3996	59.0287	87.125	97.6245	local	780.038	yes	-0.776764	0.0233634	0.102462	-0.963303	0.000485767	0.0371882
ENSRNOG00000020102	1	50.65	62	73.35	63.5675	92.125	109.151	local	351.507	yes	0.868601	0.00512746	0.0388222	0.90715	0.00186442	0.0535243
ENSRNOG00000017174	1	20.2458	32	43.7542	23.4014	33.5068	48.4836	local	315.14	yes	-0.924372	0.001021	0.0133614	-0.695163	0.0376304	0.237865
ENSRNOG00000031439	1	55.1028	62	68.8972	81.0069	92.125	100.747	distant	1171.72	yes	0.939578	0.000526789	0.0115187	0.973453	4.58469419482022e-05	0.0298765
ENSRNOG00000019578	1	53	58	63	73.8462	87.125	93.375	local	2847.55	yes	0.938942	0.000543337	0.0115187	0.949957	0.00104731	0.0397681
ENSRNOG00000020650	1	54.3876	68	81.6124	79.2189	99.625	124.335	local	190.749	yes	-0.929338	0.00083599	0.0123772	-0.876549	0.0096127	0.116196
ENSRNOG00000015976	1	63.9874	72	80.0126	94.6093	104.625	122.153	local	866.033	yes	-0.958151	0.000177533	0.0053767	-0.973054	0.000225618	0.0298765
ENSRNOG00000025284	2	0.149776	10	19.8502	9.35946	29.6163	39.2277	distant	527.116	no	NA	NA	NA	-0.130039	0.70314	0.907235
ENSRNOG00000016168	2	75.4415	88	100.558	140.153	170.577	203.254	distant	253.587	no	NA	NA	NA	0.129881	0.720629	0.912709
ENSRNOG00000014414	2	56.9699	68	79.0301	94.1211	123.875	148.003	local	383.24	no	NA	NA	NA	-0.177776	0.601004	0.84165
ENSRNOG00000017413	2	41.7606	54	66.2394	59.7338	87.1702	120.024	local	276.423	no	NA	NA	NA	0.292927	0.411432	0.706925
ENSRNOG00000013872	2	70.5451	84	97.4549	129.443	160.4	196.963	local	199.046	no	NA	NA	NA	0.239577	0.504985	0.776232
ENSRNOG00000038892	2	46.9792	58	69.0208	71.0513	96.5319	126.108	local	384.198	no	NA	NA	NA	0.409176	0.211441	0.533433
ENSRNOG00000018681	2	77.333	90	102.667	144.291	176.557	207.528	local	246.261	no	NA	NA	NA	-0.155024	0.668919	0.884616
ENSRNOG00000013521	2	1.47173	14	26.5283	12.5321	33.8023	44.9752	local	255.667	no	NA	NA	NA	-0.074191	0.818754	0.941631
ENSRNOG00000010183	2	82.4274	92	101.573	157.255	182.536	205.309	local	568.181	no	NA	NA	NA	0.00450559	0.990144	0.993603
ENSRNOG00000042620	2	48.276	62	75.724	73.8637	108.645	140.771	distant	185.088	no	NA	NA	NA	-0.531375	0.0925427	0.384108
ENSRNOG00000016164	2	74.2999	84	93.7001	137.656	160.4	187.619	local	548.935	no	NA	NA	NA	-0.20882	0.562609	0.817801
ENSRNOG00000014232	2	73.7616	84	94.2384	136.479	160.4	189.228	local	474.636	no	NA	NA	NA	-0.236135	0.511306	0.777682
ENSRNOG00000013476	2	117.629	128	138.371	221.967	232.375	244.671	local	457.949	no	NA	NA	NA	-0.18496	0.60896	0.847104
ENSRNOG00000012414	2	0	4	14.8489	9	18.6	34.6907	local	402.476	no	NA	NA	NA	-0.366263	0.297906	0.616504
ENSRNOG00000016622	2	0	10	22.9557	9	29.6163	41.9004	local	227.784	no	NA	NA	NA	0.135746	0.690655	0.901253
ENSRNOG00000029465	2	77.8761	92	106.124	145.479	182.536	211.057	distant	166.131	no	NA	NA	NA	-0.150273	0.678602	0.892284
ENSRNOG00000011032	2	0.0981053	14	27.9019	9.23545	33.8023	46.1574	local	176.4	no	NA	NA	NA	-0.4348	0.157789	0.483186
ENSRNOG00000021155	2	81.9412	94	106.059	156.282	188.515	210.995	local	290.241	no	NA	NA	NA	0.63021	0.050804	0.271348
ENSRNOG00000016733	2	74.0033	88	101.997	137.007	170.577	206.169	local	171.939	no	NA	NA	NA	0.4014	0.25026	0.576686
ENSRNOG00000009372	2	104.548	116	127.452	209.563	220.422	231.69	local	341.979	no	NA	NA	NA	0.0473579	0.896637	0.958382
ENSRNOG00000019221	2	97.4829	106	114.517	197.019	210.94	219.016	local	755.684	no	NA	NA	NA	-0.0605871	0.867951	0.946577
ENSRNOG00000040297	2	0	2	15.9418	9	13.8	35.8345	local	174.507	no	NA	NA	NA	-0.442143	0.200743	0.521933
ENSRNOG00000009388	2	75.3923	86	96.6077	140.046	164.598	195.245	local	429.564	no	NA	NA	NA	-0.495034	0.17544	0.507999
ENSRNOG00000033560	2	84.8511	96	107.149	162.102	194.014	212.029	local	371.127	no	NA	NA	NA	0.0889015	0.807058	0.934559
ENSRNOG00000013434	2	74.9044	86	97.0956	138.978	164.598	196.234	local	376.523	no	NA	NA	NA	0.379109	0.314306	0.626165
ENSRNOG00000014002	2	87.9582	102	116.042	170.452	206.176	220.462	local	169.857	no	NA	NA	NA	-0.382562	0.309552	0.621811
ENSRNOG00000009730	2	52.2869	66	79.7131	83.1608	119.5	149.497	local	185.63	no	NA	NA	NA	0.0689909	0.840264	0.946142
ENSRNOG00000006010	2	104.107	118	131.893	209.145	222.319	237.241	distant	176.837	no	NA	NA	NA	0.105176	0.772456	0.923733
ENSRNOG00000025285	2	0	10	22.2199	9	29.6163	41.2672	local	277.878	no	NA	NA	NA	-0.316463	0.343058	0.645681
ENSRNOG00000013535	2	72.1426	86	99.8574	132.937	164.598	201.833	distant	178.534	no	NA	NA	NA	-0.0169728	0.965432	0.983525
ENSRNOG00000010799	2	85.133	98	110.867	162.666	198.068	215.555	distant	233.311	no	NA	NA	NA	0.473724	0.166643	0.497044
ENSRNOG00000025462	2	4.65379	14	23.3462	20.1691	33.8023	42.2365	local	604.057	no	NA	NA	NA	-0.173275	0.590196	0.837084
ENSRNOG00000010210	2	64.1419	76	87.8581	115.209	141.375	170.153	local	306.416	no	NA	NA	NA	0.344405	0.329797	0.643712
ENSRNOG00000014046	2	68.5293	82	95.4707	125.033	156.4	192.912	local	198.197	no	NA	NA	NA	0.0581441	0.873239	0.948993
ENSRNOG00000020360	2	92.4901	104	115.51	184.001	209.043	219.958	local	336.642	no	NA	NA	NA	-0.0753463	0.836113	0.946142
ENSRNOG00000012873	2	78.5445	86	93.4555	146.941	164.598	186.887	local	1006.7	no	NA	NA	NA	0.490121	0.180435	0.507999
ENSRNOG00000013572	2	75.2227	84	92.7773	139.675	160.4	184.86	local	704.42	no	NA	NA	NA	-0.359166	0.308073	0.621811
ENSRNOG00000016691	2	33.7328	46	58.2672	51.1758	68.9277	97.2058	local	274.354	no	NA	NA	NA	0.24024	0.566582	0.820115
ENSRNOG00000006241	2	126.13	140	148	230.037	246.3	254.3	distant	177.908	no	NA	NA	NA	0.178464	0.621809	0.8536
ENSRNOG00000010280	2	0	6	17.5039	9	23.4	37.2082	local	337.191	no	NA	NA	NA	0.0390459	0.909254	0.960853
ENSRNOG00000001803	2	125.167	138	148	229.115	244.3	254.3	distant	235.432	no	NA	NA	NA	-0.165853	0.647013	0.867299
ENSRNOG00000023226	2	61.9901	76	90.0099	108.615	141.375	176.586	distant	171.329	no	NA	NA	NA	0.0242717	0.946937	0.980356
ENSRNOG00000014355	2	107.78	120	132.22	212.628	224.216	237.65	local	277.882	no	NA	NA	NA	0.203285	0.57324	0.823198
ENSRNOG00000021068	2	80.5554	94	107.445	151.555	188.515	212.31	local	199.599	no	NA	NA	NA	0.419255	0.227796	0.552645
ENSRNOG00000028014	2	65.9096	80	94.0904	119.302	150.125	188.786	distant	167.641	no	NA	NA	NA	0.495827	0.144996	0.473472
ENSRNOG00000025274	2	0	10	23.9937	9	29.6163	42.7938	local	172.08	no	NA	NA	NA	0.267754	0.426021	0.715695
ENSRNOG00000003834	2	134.216	148	148	240.146	254.3	254.3	distant	182.131	no	NA	NA	NA	0.394279	0.25955	0.582953
ENSRNOG00000011441	2	51.9881	60	68.0119	82.4615	102.516	123.901	local	866.188	no	NA	NA	NA	-0.022507	0.94763	0.980356
ENSRNOG00000023338	2	86.062	98	109.938	164.783	198.068	214.674	local	299.883	no	NA	NA	NA	0.534805	0.111209	0.407934
ENSRNOG00000009276	2	64.8149	78	91.1851	116.908	145.75	180.1	local	214.096	no	NA	NA	NA	0.350383	0.320906	0.631378
ENSRNOG00000020255	2	85.9624	100	114.038	164.486	202.122	218.561	local	170.052	no	NA	NA	NA	-0.0854367	0.827005	0.94331
ENSRNOG00000018798	2	76.198	88	99.802	141.808	170.577	201.72	local	311.095	no	NA	NA	NA	-0.336812	0.34127	0.645681
ENSRNOG00000010124	2	80.7536	94	107.246	152.263	188.515	212.122	local	210.58	no	NA	NA	NA	0.725529	0.01755	0.160501
ENSRNOG00000029726	2	94.8571	106	117.143	191.078	210.94	221.506	local	371.733	no	NA	NA	NA	0.239106	0.505846	0.776232
ENSRNOG00000016163	2	38.4012	50	61.5988	55.1936	77.8085	107.416	local	328.649	no	NA	NA	NA	0.284675	0.457816	0.740748
ENSRNOG00000010263	2	52.5892	66	79.4108	83.8683	119.5	148.836	local	201.427	no	NA	NA	NA	-0.200056	0.555332	0.814094
ENSRNOG00000030371	2	43.6223	56	68.3777	63.7712	91.8511	124.701	distant	266.281	no	NA	NA	NA	0.13054	0.719261	0.912709
ENSRNOG00000018997	3	85.9105	94	102.09	132.825	142.33	151.835	local	848.206	no	NA	NA	NA	-0.528829	0.116031	0.418563
ENSRNOG00000011028	3	89.8622	102	114.138	137.468	151.73	165.992	distant	284.116	no	NA	NA	NA	-0.754193	0.0117262	0.124297
ENSRNOG00000012811	3	59.7068	72	84.2932	83.2669	114	130.925	local	272.428	no	NA	NA	NA	0.341914	0.367796	0.678441
ENSRNOG00000004666	3	51.882	66	80.118	63.705	99	126.019	local	166.396	yes	0.0975283	0.788675	0.870733	0.0334651	0.926877	0.967604
ENSRNOG00000016883	3	92.9448	106	118	141.09	156.43	170.53	distant	221.744	no	NA	NA	NA	0.680812	0.205794	0.528741
ENSRNOG00000033091	3	46.2528	58	69.7472	55.0459	79	108.368	local	315.734	yes	0.646952	0.0431957	0.149371	0.402225	0.249196	0.576686
ENSRNOG00000024904	3	107.022	118	118	157.631	170.53	170.53	distant	388.659	no	NA	NA	NA	0.72139	0.0672736	0.313186
ENSRNOG00000007415	3	0	10	21.2844	4	14.9569	27.9151	local	357.791	yes	0.50846	0.133438	0.297777	0.467139	0.204866	0.528691
ENSRNOG00000018204	3	57.3996	70	82.6004	77.4989	109	128.936	local	250.731	no	NA	NA	NA	0.67343	0.0467616	0.263601
ENSRNOG00000015794	3	77.0301	90	102.97	121.945	137.63	152.87	local	226.909	no	NA	NA	NA	-0.0874107	0.823058	0.942005
ENSRNOG00000016636	3	98.2232	110	118	147.292	161.13	170.53	local	313.221	no	NA	NA	NA	0.470684	0.286431	0.607233
ENSRNOG00000025141	3	85.273	98	110.727	132.076	147.03	161.984	local	242.302	no	NA	NA	NA	-0.201331	0.577011	0.824002
ENSRNOG00000007765	3	45.222	54	62.778	53.6798	69	90.945	local	704.28	yes	-0.638314	0.0470184	0.15163	-0.570478	0.0668544	0.313186
ENSRNOG00000013650	3	38.4788	50	61.5212	44.4427	60.012	87.8031	distant	335.614	yes	-0.385283	0.271553	0.472202	-0.59639	0.0687792	0.313834
ENSRNOG00000000014	3	92.984	100	107.016	141.136	149.38	157.624	local	1135.41	no	NA	NA	NA	0.538016	0.108671	0.407934
ENSRNOG00000027513	3	113	118	118	164.655	170.53	170.53	local	2115.55	no	NA	NA	NA	0.404348	0.368268	0.678441
ENSRNOG00000025130	3	52.0325	66	79.9675	64.0812	99	125.842	local	173.301	yes	-0.00814435	0.982185	0.982277	-0.500025	0.14109	0.471897
ENSRNOG00000006623	3	24.1785	38	51.8215	30.9196	43.7778	63.5538	local	180.273	yes	-0.250754	0.484683	0.644787	-0.250754	0.484683	0.756096
ENSRNOG00000016794	3	0	4	15.8984	4	8.06699	21.7302	local	303.097	no	NA	NA	NA	0.558766	0.14996	0.478343
ENSRNOG00000012880	3	88.3609	100	111.639	135.704	149.38	163.056	local	325.095	no	NA	NA	NA	0.573963	0.0827307	0.356259
ENSRNOG00000042755	3	102.675	114	118	152.523	165.83	170.53	local	353.896	no	NA	NA	NA	-0.359716	0.428057	0.715695
ENSRNOG00000015285	3	44.9116	58	71.0884	53.2684	79	111.721	local	219.763	yes	0.44881	0.193232	0.369056	0.435428	0.208477	0.530963
ENSRNOG00000015105	3	46.6482	60	73.3518	55.5699	84	116.428	distant	204.664	yes	-0.474106	0.166254	0.337005	-0.149825	0.700431	0.907235
ENSRNOG00000019339	3	9.93108	22	34.0689	14.8778	28.7368	39.3533	local	289.45	yes	0.628641	0.0515597	0.15514	0.339051	0.307729	0.621811
ENSRNOG00000014072	3	72.1371	86	99.8629	114.343	132.93	149.219	distant	178.269	no	NA	NA	NA	-0.500569	0.206431	0.528741
ENSRNOG00000019118	3	101.014	114	118	150.571	165.83	170.53	local	225.928	no	NA	NA	NA	0.832068	0.0202327	0.171633
ENSRNOG00000005348	3	48.7878	58	67.2122	58.4055	79	102.03	local	626.29	yes	-0.686773	0.0282572	0.112672	-0.216573	0.547849	0.806555
ENSRNOG00000007979	3	34.8114	48	61.1886	39.9864	57.3614	86.9716	local	213.89	yes	-0.876456	0.000875747	0.0123772	-0.884592	0.000673713	0.0379751
ENSRNOG00000001556	3	40.723	50	59.277	47.5597	60.012	82.1925	local	615.414	yes	0.389448	0.265959	0.469861	0.568688	0.0862579	0.364612
ENSRNOG00000005039	3	48.6101	54	59.3899	58.1701	69	82.4746	local	1759.03	yes	0.70415	0.0230226	0.102462	0.575869	0.0637407	0.313186
ENSRNOG00000031834	3	98.2986	110	118	147.381	161.13	170.53	local	319.668	no	NA	NA	NA	-0.594147	0.159506	0.486283
ENSRNOG00000007221	3	60.4383	74	87.5617	85.0956	117.4	134.765	local	193.38	no	NA	NA	NA	0.320928	0.399757	0.699067
ENSRNOG00000026036	3	68.4778	78	87.5222	105.194	123.4	134.719	local	576.001	no	NA	NA	NA	-0.488368	0.219489	0.543985
ENSRNOG00000011379	3	64.4991	78	91.5009	95.2477	123.4	139.394	local	196.583	no	NA	NA	NA	0.466474	0.243959	0.576461
ENSRNOG00000001517	3	39.9728	48	56.0272	46.5178	57.3614	74.068	local	862.613	yes	-0.844342	0.00211906	0.0213925	-0.816265	0.00396855	0.0781237
ENSRNOG00000016380	3	86.8742	94	101.126	133.957	142.33	150.703	local	1101.87	no	NA	NA	NA	0.529549	0.115443	0.418563
ENSRNOG00000004755	3	50.4796	62	73.5204	60.6477	89	116.681	local	335.689	yes	-0.248916	0.487997	0.644787	0.297676	0.436593	0.722321
ENSRNOG00000011202	3	107.72	118	118	158.451	170.53	170.53	local	469.297	no	NA	NA	NA	0.226262	0.625643	0.8536
ENSRNOG00000004912	3	52.332	58	63.668	64.8299	79	93.1701	local	1631.68	yes	-0.745851	0.0132543	0.0826444	-0.527324	0.117266	0.418736
ENSRNOG00000010729	3	57.739	68	78.261	78.3475	104	123.791	local	471.75	no	NA	NA	NA	-0.177436	0.62385	0.8536
ENSRNOG00000018205	3	64.5547	78	91.4453	95.3866	123.4	139.328	local	199.559	no	NA	NA	NA	0.588032	0.125238	0.44025
ENSRNOG00000025296	3	0	4	12.7247	4	8.06699	18.0858	local	714.443	no	NA	NA	NA	0.675901	0.0657615	0.313186
ENSRNOG00000009421	3	56.0104	70	83.9896	74.0261	109	130.568	local	172.273	no	NA	NA	NA	-0.286391	0.454988	0.739356
ENSRNOG00000017843	3	109.913	118	118	161.028	170.53	170.53	local	848.807	no	NA	NA	NA	-0.559426	0.191635	0.515768
ENSRNOG00000024808	3	26.3959	38	49.6041	32.8105	43.7778	59.4873	local	328.182	yes	0.70182	0.0236822	0.102462	0.70182	0.0236822	0.190791
ENSRNOG00000022586	3	0	8	17.074	4	12.6603	23.0802	local	650.119	no	NA	NA	NA	0.364919	0.334227	0.64497
ENSRNOG00000009689	3	35.8749	50	64.1251	40.8933	60.012	94.3127	local	166.078	yes	0.678075	0.0311595	0.115892	0.646164	0.0435355	0.258215
ENSRNOG00000014152	3	69.2843	78	86.7157	107.211	123.4	133.771	local	716.179	no	NA	NA	NA	0.552247	0.155804	0.480695
ENSRNOG00000036813	3	93.8476	102	110.152	142.151	151.73	161.309	local	833.921	no	NA	NA	NA	0.54787	0.101111	0.400377
ENSRNOG00000022727	3	58.4143	72	85.5857	80.0357	114	132.443	local	192.131	no	NA	NA	NA	-0.330374	0.385216	0.68821
ENSRNOG00000021232	3	60.6245	74	87.3755	85.5611	117.4	134.546	local	203.357	no	NA	NA	NA	0.748125	0.0204295	0.171633
ENSRNOG00000020493	3	98.5295	112	118	147.652	163.48	170.53	distant	198.206	no	NA	NA	NA	0.128815	0.783127	0.927643
ENSRNOG00000008088	3	59.0844	72	84.9156	81.7109	114	131.656	local	230.262	no	NA	NA	NA	0.262094	0.495695	0.767491
ENSRNOG00000025832	3	0	4	17.5045	4	8.06699	23.5746	local	196.394	no	NA	NA	NA	0.450184	0.263017	0.582953
ENSRNOG00000004763	3	67.5972	78	88.4028	102.993	123.4	135.753	local	454.019	no	NA	NA	NA	0.396123	0.331309	0.644835
ENSRNOG00000005457	3	66.3077	80	93.6923	99.7692	125.88	141.968	local	186.676	no	NA	NA	NA	-0.721212	0.0434755	0.258215
ENSRNOG00000017295	3	0	6	19.682	4	10.3636	26.075	local	187.2	yes	0.347662	0.324936	0.514079	0.518766	0.15243	0.480695
ENSRNOG00000024852	3	68.7588	78	87.2412	105.897	123.4	134.388	local	621.403	no	NA	NA	NA	-0.560432	0.148486	0.47807
ENSRNOG00000036802	3	83.0427	90	96.9573	129.455	137.63	145.805	distant	1153.36	no	NA	NA	NA	0.388117	0.301981	0.621523
ENSRNOG00000036812	3	94.8446	102	109.155	143.322	151.73	160.138	local	1092.82	no	NA	NA	NA	0.55302	0.0972959	0.399029
ENSRNOG00000017737	3	46.2258	58	69.7742	55.0101	79	108.435	local	313.443	yes	0.594363	0.0699717	0.18281	0.464187	0.176546	0.507999
ENSRNOG00000000489	3	96.5621	110	118	145.34	161.13	170.53	distant	199.96	no	NA	NA	NA	0.248878	0.590454	0.837084
ENSRNOG00000004680	3	28.1656	42	55.8344	34.3195	49.3333	73.586	distant	179.647	yes	-0.68219	0.0297625	0.112672	-0.49746	0.143469	0.473472
ENSRNOG00000030444	4	85	90	95	149.333	156.392	163.494	distant	2538.83	yes	0.360458	0.380403	0.571953	0.612324	0.106593	0.407934
ENSRNOG00000010802	4	62.0311	76	89.9689	110.224	137.333	156.348	distant	173.235	yes	-0.548906	0.158845	0.327194	-0.463136	0.177658	0.507999
ENSRNOG00000022155	4	55.6665	68	80.3335	93.3863	123.647	143.111	local	269.484	yes	-0.326852	0.429402	0.612684	-0.269908	0.482444	0.756096
ENSRNOG00000007079	4	22.7331	36	49.2669	32.8456	51.8	77.556	local	209.417	no	NA	NA	NA	0.485383	0.18533	0.508641
ENSRNOG00000012149	4	0	4	18.0251	4	9.07553	26.8717	distant	170.625	no	NA	NA	NA	0.2502	0.516143	0.783309
ENSRNOG00000001807	4	95.1496	106	106	163.707	181.444	181.444	local	402.315	yes	-0.0286123	0.946381	0.972941	0.0367614	0.925195	0.967604
ENSRNOG00000015076	4	52.4568	66	79.5432	84.3989	119.882	142.058	local	194.35	yes	-0.59954	0.116193	0.276775	-0.386857	0.30369	0.621811
ENSRNOG00000006144	4	65.9154	76	86.0846	119.723	137.333	150.83	local	494.778	yes	0.0637974	0.880704	0.933546	-0.257243	0.473063	0.749288
ENSRNOG00000029320	4	13.6027	24	34.3973	21.2603	34.4532	48.5946	local	454.693	no	NA	NA	NA	-0.185594	0.632597	0.856305
ENSRNOG00000006779	4	0	2	14.5074	4	6.53776	22.4082	local	257.109	no	NA	NA	NA	-0.440072	0.235864	0.56232
ENSRNOG00000015318	4	92.0709	106	106	159.334	181.444	181.444	distant	175.106	yes	0.852856	0.0071115	0.0502546	0.428824	0.249447	0.576686
ENSRNOG00000039854	4	12.2914	24	35.7086	19.5963	34.4532	51.2172	local	319.045	no	NA	NA	NA	-0.0980459	0.801856	0.931667
ENSRNOG00000007041	4	46.1194	60	73.8806	71.5608	104.905	134.507	local	177.419	yes	0.111483	0.792695	0.870733	0.13179	0.735376	0.914172
ENSRNOG00000007036	4	43.9704	58	72.0296	67.4675	99.6667	131.232	distant	170.418	yes	-0.533793	0.173007	0.337005	-0.0648908	0.868269	0.946577
ENSRNOG00000027433	4	35.4507	44	52.5493	50.7015	67.5238	84.6579	local	749.129	no	NA	NA	NA	-0.183811	0.635927	0.859125
ENSRNOG00000006784	4	59.0321	68	76.9679	102.37	123.647	138.624	local	669.017	yes	-0.185491	0.660099	0.773155	-0.0782361	0.84143	0.946142
ENSRNOG00000014090	4	52.9163	62	71.0837	85.6857	110.143	129.452	local	648.414	yes	-0.200474	0.634062	0.757769	-0.19012	0.624168	0.8536
ENSRNOG00000005686	4	50.4461	64	77.5539	79.8022	115.381	139.405	local	193.792	yes	0.0250404	0.953069	0.972941	-0.0126798	0.974172	0.985616
ENSRNOG00000001817	4	94.8514	106	106	163.283	181.444	181.444	local	371.161	yes	0.143783	0.7341	0.830549	-0.00601121	0.987754	0.993522
ENSRNOG00000015763	4	50.3311	62	73.6689	79.5831	110.143	134.225	local	322.489	yes	-0.292721	0.481694	0.644787	0.116451	0.765432	0.920547
ENSRNOG00000007374	4	8.64295	22	35.3571	14.9669	31.9154	50.5141	local	204.375	no	NA	NA	NA	-0.353173	0.351172	0.657493
ENSRNOG00000011667	4	0	8	20.84	4	14.1511	30.4436	local	235.014	no	NA	NA	NA	0.100654	0.796673	0.931667
ENSRNOG00000017798	4	35.0714	48	60.9286	49.9427	75.1429	107.337	distant	229.455	yes	0.0876178	0.836555	0.900253	-0.491999	0.178516	0.507999
ENSRNOG00000007515	4	38.6522	52	65.3478	57.1044	83.12	118.655	distant	204.888	yes	-0.328667	0.42669	0.612684	-0.098695	0.800565	0.931667
ENSRNOG00000033307	4	90.38	104	106	156.932	177	181.444	distant	190.361	yes	-0.433308	0.283515	0.480841	-0.529862	0.14231	0.473472
ENSRNOG00000016043	4	68.539	82	95.461	124.662	145.333	164.149	distant	198.714	yes	0.24449	0.559521	0.693675	0.301854	0.467463	0.747772
ENSRNOG00000017528	5	108.042	116	116	166.265	173	173	local	878.86	no	NA	NA	NA	-0.70119	0.0353211	0.237865
ENSRNOG00000005392	5	39.8979	54	68.1021	62.4964	92.1026	117.612	distant	167.111	no	NA	NA	NA	-0.317591	0.314446	0.626165
ENSRNOG00000000156	5	98.4625	112	116	157.125	170.042	173	local	194.651	no	NA	NA	NA	-0.428349	0.289682	0.612241
ENSRNOG00000026592	5	69.9605	84	98.0395	120.406	142.235	156.721	local	169.961	no	NA	NA	NA	-0.0780765	0.8542	0.946142
ENSRNOG00000028583	5	66.144	76	85.856	114.583	129.244	144.419	distant	526.293	no	NA	NA	NA	-0.597283	0.0682579	0.313834
ENSRNOG00000043151	5	46.0417	60	73.9583	73.057	105.082	126.256	local	173.732	no	NA	NA	NA	0.437028	0.135369	0.459453
ENSRNOG00000006341	5	70.015	84	97.985	120.485	142.235	156.669	distant	172.485	no	NA	NA	NA	0.561651	0.147413	0.47718
ENSRNOG00000042224	5	54.4866	68	81.5134	93.2672	117.454	139.31	local	195.926	no	NA	NA	NA	-0.639447	0.0341337	0.232852
ENSRNOG00000007799	5	67.0614	76	84.9386	116.002	129.244	143.34	local	674.332	no	NA	NA	NA	0.754723	0.0116335	0.124297
ENSRNOG00000044439	5	30.1734	44	57.8266	47.9385	69.3333	101.053	local	180.025	no	NA	NA	NA	0.116569	0.732862	0.914172
ENSRNOG00000042246	5	46.5244	60	73.4756	74.2123	105.082	125.55	distant	197.934	no	NA	NA	NA	0.268693	0.374725	0.681228
ENSRNOG00000007189	5	71.396	78	84.604	122.506	132.75	142.946	local	1267.09	no	NA	NA	NA	-0.5573	0.0941964	0.388631
ENSRNOG00000027253	5	43.1412	56	68.8588	67.902	96.8889	118.782	distant	233.824	no	NA	NA	NA	0.397685	0.178398	0.507999
ENSRNOG00000023008	5	99.3342	112	116	157.956	170.042	173	local	246.341	no	NA	NA	NA	0.307992	0.457995	0.740748
ENSRNOG00000000443	5	42.841	56	69.159	67.4016	96.8889	119.233	distant	215.608	no	NA	NA	NA	-0.272639	0.367476	0.678441
ENSRNOG00000014642	5	111	116	116	169.088	173	173	local	3357.06	no	NA	NA	NA	0.691864	0.0389347	0.239518
ENSRNOG00000007837	5	70.0994	82	93.9006	120.609	139.882	152.772	local	302.92	no	NA	NA	NA	0.187731	0.628611	0.854267
ENSRNOG00000004001	5	60.2429	74	87.7571	105.458	126.317	146.655	distant	183.439	no	NA	NA	NA	0.47473	0.165618	0.497044
ENSRNOG00000043513	5	75	80	85	127.78	137.125	143.412	local	3235.76	no	NA	NA	NA	-0.534886	0.111144	0.407934
ENSRNOG00000011258	5	68.5265	82	95.4735	118.268	139.882	154.272	distant	198.044	no	NA	NA	NA	-0.0735507	0.850838	0.946142
ENSRNOG00000015962	5	105	110	115	163.363	168.134	172.905	local	3992.35	no	NA	NA	NA	0.541072	0.166104	0.497044
ENSRNOG00000015318	5	71.1948	84	96.8052	122.212	142.235	155.543	local	237.236	no	NA	NA	NA	0.0194978	0.963451	0.983525
ENSRNOG00000026840	5	107.257	116	116	165.516	173	173	local	710.947	no	NA	NA	NA	0.270657	0.481182	0.756096
ENSRNOG00000026447	5	101.728	112	116	160.24	170.042	173	local	470.338	no	NA	NA	NA	-0.611415	0.107261	0.407934
ENSRNOG00000014863	5	32.2077	42	51.7923	50.889	66	86.8193	local	535.493	no	NA	NA	NA	0.15442	0.650303	0.868881
ENSRNOG00000024953	5	9.73774	18	26.2623	21.2468	31.7397	42.2659	local	809.533	no	NA	NA	NA	-0.163768	0.611046	0.847104
ENSRNOG00000023459	5	62.9904	74	85.0096	109.707	126.317	143.423	local	385.366	no	NA	NA	NA	0.845259	0.00207199	0.057104
ENSRNOG00000014766	5	27.4144	40	52.5856	43.9369	62.6667	88.7177	local	251.736	no	NA	NA	NA	-0.243294	0.470978	0.747772
ENSRNOG00000008118	5	80.4359	92	103.564	138.042	150.958	161.992	local	331.752	no	NA	NA	NA	-0.0165764	0.966239	0.983525
ENSRNOG00000018118	5	103.401	116	116	161.837	173	173	local	250.832	no	NA	NA	NA	0.800942	0.00947956	0.116196
ENSRNOG00000025034	5	106.693	116	116	164.978	173	173	local	610.508	no	NA	NA	NA	0.548884	0.125902	0.440338
ENSRNOG00000009974	5	22.1972	28	33.8028	36.9144	44.7863	53.2025	distant	1573.35	no	NA	NA	NA	0.116857	0.732222	0.914172
ENSRNOG00000006485	5	24.0573	38	51.9427	39.2076	59.3333	87.1791	local	174.467	no	NA	NA	NA	0.0952576	0.780552	0.927643
ENSRNOG00000023152	5	92.3581	104	115.642	151.3	162.408	173	local	324.848	no	NA	NA	NA	-0.447441	0.266297	0.583238
ENSRNOG00000012634	5	28.9891	42	55.0109	46.2209	66	94.5217	local	224.414	no	NA	NA	NA	-0.423553	0.19425	0.518215
ENSRNOG00000000145	5	73.5803	84	94.4197	125.703	142.235	153.267	local	451.945	no	NA	NA	NA	-0.497165	0.210033	0.532032
ENSRNOG00000008236	5	12.3333	26	39.6667	24.7534	41.8855	62.1112	local	187.973	no	NA	NA	NA	-0.189924	0.575929	0.824002
ENSRNOG00000037595	5	66.605	80	93.395	115.296	137.125	152.289	local	202.291	no	NA	NA	NA	0.523303	0.120605	0.426137
ENSRNOG00000014241	5	92.6402	102	111.36	151.569	160.5	169.431	local	601.846	no	NA	NA	NA	-0.465338	0.245264	0.576686
ENSRNOG00000009325	5	92.3219	106	116	151.265	164.317	173	local	187.395	no	NA	NA	NA	0.712269	0.0474405	0.263601
ENSRNOG00000019977	5	69.6504	82	94.3496	119.952	139.882	153.2	local	268.31	no	NA	NA	NA	0.217788	0.57349	0.823198
ENSRNOG00000016364	5	30.4706	42	53.5294	48.3695	66	90.9764	local	334.869	no	NA	NA	NA	-0.058456	0.864443	0.946577
ENSRNOG00000042731	5	85.0078	98	110.992	143.421	156.683	169.08	distant	225.546	no	NA	NA	NA	-0.42177	0.297962	0.616504
ENSRNOG00000010169	5	71.3625	82	92.6375	122.457	139.882	151.566	local	426.124	no	NA	NA	NA	0.360783	0.340146	0.645622
ENSRNOG00000003049	5	66.2244	80	93.7756	114.708	137.125	152.652	distant	182.525	no	NA	NA	NA	-0.813547	0.004194	0.0802684
ENSRNOG00000030585	5	73.9533	84	94.0467	126.249	142.235	152.911	distant	499.86	no	NA	NA	NA	-0.122407	0.77277	0.923733
ENSRNOG00000024539	5	26.4143	40	53.5857	42.4863	62.6667	91.1112	local	192.13	no	NA	NA	NA	-0.108782	0.750198	0.914172
ENSRNOG00000005850	5	0	2	8.84028	1	5.15842	19.3808	local	1189.12	no	NA	NA	NA	-0.161731	0.615548	0.851631
ENSRNOG00000017846	5	43	48	53	67.6667	77.7436	89.7094	local	2206.93	no	NA	NA	NA	-0.130326	0.70251	0.907235
ENSRNOG00000019981	5	103.911	116	116	162.324	173	173	local	287.897	no	NA	NA	NA	-0.448009	0.226526	0.552031
ENSRNOG00000021318	5	67.9887	82	96.0113	117.436	139.882	154.786	distant	171.262	no	NA	NA	NA	0.247248	0.52127	0.786487
ENSRNOG00000029339	5	73.7775	84	94.2225	125.991	142.235	153.079	distant	476.683	no	NA	NA	NA	-0.144108	0.733514	0.914172
ENSRNOG00000010881	5	97.5547	110	116	156.258	168.134	173	distant	261.47	no	NA	NA	NA	0.66774	0.070368	0.316455
ENSRNOG00000000129	5	27.6386	40	52.3614	44.2621	62.6667	88.1812	local	267.457	no	NA	NA	NA	0.365807	0.268572	0.583238
ENSRNOG00000026646	5	75.8776	86	96.1224	129.065	144.588	154.892	local	489.75	no	NA	NA	NA	0.0816962	0.8475	0.946142
ENSRNOG00000009298	5	102.14	110	116	160.634	168.134	173	local	902.58	no	NA	NA	NA	-0.617226	0.103037	0.405671
ENSRNOG00000015193	5	54.013	68	81.987	92.1337	117.454	139.867	distant	172.392	no	NA	NA	NA	0.791366	0.00371202	0.0752229
ENSRNOG00000024763	5	97.398	110	116	156.109	168.134	173	distant	250.623	no	NA	NA	NA	0.391079	0.338063	0.645316
ENSRNOG00000009683	5	5.91607	20	34.0839	13.3007	34.2055	53.6103	local	167.934	no	NA	NA	NA	-0.277538	0.408639	0.706449
ENSRNOG00000017895	5	98.9951	112	116	157.633	170.042	173	local	224.775	no	NA	NA	NA	0.443889	0.270574	0.583238
ENSRNOG00000016638	5	101.12	114	116	159.66	171.95	173	local	232.477	no	NA	NA	NA	-0.74719	0.0206756	0.171633
ENSRNOG00000018700	5	89.1549	102	114.845	148.243	160.5	172.757	distant	234.696	no	NA	NA	NA	0.489283	0.218495	0.543477
ENSRNOG00000033090	6	4.96617	12	19.0338	6.04059	20.5	29.2923	local	1129.98	no	NA	NA	NA	-0.290596	0.415336	0.710091
ENSRNOG00000027960	6	68.2311	74	79.7689	109.052	115.636	122.188	distant	1587.88	yes	-0.683302	0.0617433	0.167815	-0.667963	0.0702396	0.316455
ENSRNOG00000029637	6	67	72	77	107.647	113.353	119.06	local	2261.37	yes	-0.731644	0.0391121	0.138196	-0.714308	0.0465184	0.263601
ENSRNOG00000004968	6	80.4155	94	96	122.906	138	144	local	192.196	yes	-0.258215	0.536937	0.673555	-0.252398	0.546469	0.806246
ENSRNOG00000006082	6	4.10944	18	31.8906	7.06868	28	45.0283	local	176.941	no	NA	NA	NA	-0.119112	0.743108	0.914172
ENSRNOG00000006388	6	54.0967	60	65.9033	83.8174	99.2174	106.395	local	1531.22	no	NA	NA	NA	-0.621383	0.100075	0.399581
ENSRNOG00000011964	6	60.3388	74	87.6612	100.044	115.636	130.957	local	188.256	yes	-0.695579	0.055406	0.158731	-0.77432	0.0240911	0.190791
ENSRNOG00000008291	6	2.61308	10	17.3869	8.86431	15.1212	27.2337	local	1025.55	no	NA	NA	NA	0.385782	0.27088	0.583238
ENSRNOG00000003831	6	79.4214	88	96	121.802	131.333	144	local	743.218	yes	0.800429	0.0170158	0.0924964	0.600443	0.153993	0.480695
ENSRNOG00000037518	6	8.885	22	35.115	9.71516	33	48.8837	distant	218.188	no	NA	NA	NA	-0.264212	0.492088	0.765346
ENSRNOG00000004004	6	70.1673	82	93.8327	111.262	124.667	137.814	local	308.525	yes	0.796628	0.0179518	0.0946	0.783157	0.0372742	0.237865
ENSRNOG00000006699	6	56.7005	68	79.2995	90.61	108.788	121.666	local	356.335	yes	0.503545	0.20331	0.378085	0.553219	0.154924	0.480695
ENSRNOG00000040266	6	0	12	24.4367	12	20.5	36.0459	local	262.078	no	NA	NA	NA	0.682971	0.0295021	0.210814
ENSRNOG00000043279	6	59.2741	72	84.7259	97.3238	113.353	127.695	distant	242.376	yes	-0.0193317	0.963762	0.972941	0.440491	0.274698	0.589616
ENSRNOG00000033887	6	48.4246	58	67.5754	70.1689	94	108.303	local	567.74	no	NA	NA	NA	0.710941	0.0480473	0.263883
ENSRNOG00000004542	6	82.3631	96	96	125.07	144	144	distant	189.497	yes	0.700747	0.05286	0.155643	0.61361	0.105654	0.407934
ENSRNOG00000042932	6	5.92103	14	22.079	4.89477	23	33.0987	local	850.624	no	NA	NA	NA	-0.228769	0.524945	0.786487
ENSRNOG00000033206	6	59.1684	70	80.8316	97.048	111.071	123.368	local	404.358	yes	0.903742	0.00207183	0.0213925	0.733587	0.0383299	0.239518
ENSRNOG00000009967	6	6.97286	18	29.0271	3.63257	28	41.6374	local	383.541	no	NA	NA	NA	0.635616	0.0482573	0.263883
ENSRNOG00000029871	6	58.9456	70	81.0544	96.4669	111.071	123.616	local	380.735	yes	-0.420061	0.300132	0.492896	-0.621022	0.10033	0.399581
ENSRNOG00000007001	6	57.7477	68	78.2523	93.3417	108.788	120.489	local	472.855	yes	0.819945	0.0126936	0.0815466	0.766623	0.0264746	0.20045
ENSRNOG00000006472	6	54.8414	66	77.1586	85.7602	106.505	119.241	local	370.159	yes	-0.259514	0.534817	0.673555	-0.357138	0.385127	0.68821
ENSRNOG00000009730	6	73.4397	86	96	114.996	129.111	144	distant	253.463	yes	0.862412	0.00585806	0.0428244	0.820256	0.0238197	0.190791
ENSRNOG00000005053	6	33.971	48	62.029	47.492	69.2436	101.973	local	170.447	no	NA	NA	NA	-0.737939	0.0366136	0.237865
ENSRNOG00000007660	6	57	62	67	91.3913	101.94	107.647	local	2402.02	no	NA	NA	NA	-0.438957	0.276568	0.591788
ENSRNOG00000005766	6	20.9873	34	47.0127	31.7341	47.5263	67.0918	distant	224.301	no	NA	NA	NA	-0.644104	0.0611678	0.305396
ENSRNOG00000011164	6	59.1318	70	80.8682	96.9524	111.071	123.409	local	400.377	yes	0.702616	0.0519573	0.15514	0.789814	0.0197086	0.171633
ENSRNOG00000010650	6	55.4782	68	80.5218	87.4214	108.788	123.024	local	256.115	yes	-0.316367	0.445204	0.618663	-0.605967	0.111309	0.407934
ENSRNOG00000010914	6	53.5515	66	78.4485	82.3952	106.505	120.713	local	261.248	yes	0.105694	0.803294	0.877827	-0.458985	0.25263	0.57828
ENSRNOG00000025317	6	2.05289	12	21.9471	9.53653	20.5	32.9339	local	513.5	no	NA	NA	NA	-0.460113	0.18088	0.507999
ENSRNOG00000005087	6	4.09666	16	27.9033	7.08401	25.5	40.3066	local	302.692	no	NA	NA	NA	0.637412	0.0474302	0.263601
ENSRNOG00000007271	6	60.2885	74	87.7115	99.97	115.636	131.013	local	185.711	yes	0.439108	0.276385	0.472529	0.564422	0.14499	0.473472
ENSRNOG00000032391	6	88.5616	96	96	131.957	144	144	local	1011.37	yes	0.571299	0.13907	0.300846	0.521618	0.184891	0.508641
ENSRNOG00000006777	6	15.3763	28	40.6237	24.7204	40.4211	55.6922	local	249.16	no	NA	NA	NA	-0.133404	0.732231	0.914172
ENSRNOG00000005286	6	42.9362	52	61.0638	58.5503	78.3478	100.872	local	651.901	no	NA	NA	NA	0.856735	0.0137922	0.133969
ENSRNOG00000007254	6	60.3247	72	83.6753	100.028	113.353	126.528	local	321.931	yes	-0.732308	0.0388437	0.138196	-0.7562	0.0299266	0.210814
ENSRNOG00000020498	6	66.0783	80	93.9217	106.595	122.444	137.913	distant	175.457	yes	-0.367677	0.370217	0.564647	-0.399448	0.374656	0.681228
ENSRNOG00000009039	6	27.9606	40	52.0394	40.3744	54.9213	78.4507	local	291.766	no	NA	NA	NA	0.271587	0.479616	0.756096
ENSRNOG00000042333	6	62.1756	72	81.8244	102.141	113.353	124.472	local	530.846	yes	0.78677	0.0205264	0.0946	0.693186	0.0566094	0.289968
ENSRNOG00000009166	6	76.2131	88	96	118.162	131.333	144	local	312.37	yes	0.623251	0.0987601	0.246319	0.555353	0.195593	0.51832
ENSRNOG00000007364	6	47.6651	60	72.3349	68.5137	99.2174	113.735	local	269.38	yes	-0.788798	0.0199791	0.0946	-0.424019	0.295118	0.616504
ENSRNOG00000004526	6	10.1726	22	33.8274	15.9581	33	47.3219	distant	308.968	no	NA	NA	NA	-0.498722	0.171742	0.505624
ENSRNOG00000009080	6	48.0631	62	75.9369	69.3811	101.94	117.846	local	174.739	yes	-0.416581	0.304573	0.492896	-0.513583	0.192966	0.517329
ENSRNOG00000036834	7	98.9295	108	108	131.665	143	143	local	650.731	no	NA	NA	NA	-0.474614	0.196729	0.519335
ENSRNOG00000022570	7	93.068	104	108	125.689	137.483	143	local	393.529	no	NA	NA	NA	0.736989	0.023488	0.190791
ENSRNOG00000005425	7	0	2	8.15452	2	11.7297	25.3994	local	1431.4	no	NA	NA	NA	-0.156931	0.801012	0.931667
ENSRNOG00000007003	7	78.8388	90	101.161	111.181	122.561	133.941	local	369.897	no	NA	NA	NA	0.663331	0.0514463	0.271383
ENSRNOG00000004226	7	36.0591	48	59.9409	50.2277	59.9188	80.2986	local	299.646	no	NA	NA	NA	-0.526992	0.144888	0.473472
ENSRNOG00000008417	7	0	2	14.2061	2	11.7297	32.4919	local	278.921	no	NA	NA	NA	-0.17772	0.774917	0.923733
ENSRNOG00000019147	7	75.2245	88	100.776	106.639	120.522	133.548	distant	239.146	no	NA	NA	NA	0.696132	0.0372529	0.237865
ENSRNOG00000032315	7	0	2	14.0717	2	11.7297	32.3829	local	289.229	no	NA	NA	NA	0.0416429	0.946994	0.980356
ENSRNOG00000031233	7	81.3487	94	106.651	113.74	126.639	141.14	local	247.312	no	NA	NA	NA	-0.814865	0.0137427	0.133969
ENSRNOG00000032552	7	0	2	13.2328	2	11.7297	31.5549	local	362.814	no	NA	NA	NA	-0.0713485	0.909233	0.960853
ENSRNOG00000005350	7	0	6	12.5364	2	22.7879	30.7108	local	1290.52	no	NA	NA	NA	0.169353	0.785408	0.92821
ENSRNOG00000004494	7	3.09595	16	28.904	17.0614	33.9478	44.4207	local	230.985	no	NA	NA	NA	0.300116	0.470158	0.747772
ENSRNOG00000030633	7	86.6261	98	108	119.121	130.718	143	local	349.252	no	NA	NA	NA	-0.538796	0.134456	0.458613
ENSRNOG00000003964	7	58.2455	66	73.7545	76.8349	91.88	104.287	local	928.584	no	NA	NA	NA	-0.433042	0.244306	0.576461
ENSRNOG00000031081	7	0	2	12.5811	2	11.7297	30.7649	local	432.671	no	NA	NA	NA	0.0647546	0.91761	0.964008
ENSRNOG00000031993	7	0	2	12.0583	2	11.7297	30.1313	local	498.302	no	NA	NA	NA	-0.156447	0.801622	0.931667
ENSRNOG00000004962	7	0	4	13.4743	2	20.3636	31.8476	local	583.471	no	NA	NA	NA	-0.0237151	0.969808	0.983525
ENSRNOG00000003076	7	0	2	13.1538	2	11.7297	31.4591	local	370.641	no	NA	NA	NA	0.201151	0.745624	0.914172
ENSRNOG00000010141	7	64.701	78	91.299	89.8017	110.325	123.885	local	207.609	no	NA	NA	NA	-0.327664	0.389362	0.68821
ENSRNOG00000004229	7	44.9208	56	67.0792	57.4198	72.2473	93.6066	local	378.201	no	NA	NA	NA	0.05659	0.885023	0.955769
ENSRNOG00000005487	7	1.38993	14	26.6101	8.7618	32.3246	42.5589	local	250.078	no	NA	NA	NA	0.193836	0.645558	0.867036
ENSRNOG00000004793	7	0	2	10.2349	2	11.7297	27.9211	local	815.53	no	NA	NA	NA	0.0865541	0.889934	0.956575
ENSRNOG00000005437	7	44.2405	56	67.7595	56.8676	72.2473	94.6952	local	314.687	no	NA	NA	NA	0.301098	0.431079	0.715695
ENSRNOG00000030520	7	0	2	11.4796	2	11.7297	29.4298	local	582.636	no	NA	NA	NA	0.195801	0.752301	0.914172
ENSRNOG00000042094	7	95.8481	108	108	128.524	143	143	local	283.03	no	NA	NA	NA	-0.417517	0.263511	0.582953
ENSRNOG00000009592	7	61.3905	74	86.6095	83.2602	104.68	119.104	distant	250.12	no	NA	NA	NA	0.448034	0.226497	0.552031
ENSRNOG00000007650	7	0	2	15.549	2	11.7297	33.5818	local	194.045	no	NA	NA	NA	0.266653	0.664555	0.880535
ENSRNOG00000005975	7	44.0247	56	67.9753	56.6925	72.2473	95.0405	local	296.873	no	NA	NA	NA	0.145651	0.708477	0.909161
ENSRNOG00000033627	7	82.955	96	108	115.378	128.678	143	local	222.353	no	NA	NA	NA	-0.610496	0.107938	0.407934
ENSRNOG00000036835	7	94.4421	108	108	127.09	143	143	local	193.58	no	NA	NA	NA	-0.630786	0.0685357	0.313834
ENSRNOG00000010793	7	96.7611	108	108	129.454	143	143	local	362.212	no	NA	NA	NA	-0.539933	0.133475	0.457535
ENSRNOG00000009094	7	13.8877	26	38.1123	32.2335	42.0638	51.8941	local	286.076	no	NA	NA	NA	0.107291	0.783514	0.927643
ENSRNOG00000043350	7	41.9808	56	70.0192	55.0337	72.2473	98.3108	distant	170.896	no	NA	NA	NA	-0.616094	0.077282	0.341329
ENSRNOG00000032871	7	80.7924	94	107.208	113.173	126.639	141.907	local	212.797	no	NA	NA	NA	0.595536	0.119297	0.423689
ENSRNOG00000002642	7	0	2	9.50786	2	11.7297	27.0398	local	992.544	no	NA	NA	NA	-0.366447	0.544089	0.805843
ENSRNOG00000004089	7	51.0559	64	76.9441	64.3468	88.5914	109.249	local	228.495	no	NA	NA	NA	-0.0497153	0.906937	0.960853
ENSRNOG00000011489	7	0	2	11.5202	2	11.7297	29.4791	local	576.313	no	NA	NA	NA	-0.189515	0.760154	0.920547
ENSRNOG00000032825	7	44.0787	56	67.9213	56.7363	72.2473	94.9541	distant	301.228	no	NA	NA	NA	-0.36124	0.33949	0.645622
ENSRNOG00000006723	8	45	50	55	58.5564	68.7068	77.6544	local	2992.23	no	NA	NA	NA	0.598113	0.117295	0.418736
ENSRNOG00000015863	8	8.79474	18	27.2053	15.8203	26.6891	33.5025	local	627.464	no	NA	NA	NA	-0.268548	0.520158	0.786487
ENSRNOG00000042726	8	65	70	75	91.625	96.5385	100.385	local	3835.87	yes	0.23308	0.614971	0.744993	0.0811581	0.848495	0.946142
ENSRNOG00000000217	8	73.8028	82	90.1972	99.4637	106.573	116.635	distant	823.908	yes	0.764705	0.0452299	0.149824	0.716699	0.10902	0.407934
ENSRNOG00000025676	8	89.8183	98	98	116.109	126.843	126.843	local	827.368	yes	-0.457272	0.302258	0.492896	-0.609408	0.0814805	0.353862
ENSRNOG00000027880	8	83.4329	94	98	107.861	121.7	126.843	local	434.301	yes	0.323406	0.479225	0.644787	0.48522	0.1855	0.508641
ENSRNOG00000015949	8	43.8532	52	60.1468	56.2282	72.7669	84.8448	local	835.181	no	NA	NA	NA	-0.333197	0.419956	0.712683
ENSRNOG00000030016	8	22.6544	32	41.3456	29.8181	39.0216	51.1377	local	604.153	no	NA	NA	NA	-0.519399	0.232198	0.559386
ENSRNOG00000029773	8	28.8083	38	47.1917	35.3477	45.9281	63.0058	local	629.761	no	NA	NA	NA	-0.358688	0.485042	0.756096
ENSRNOG00000008138	8	31.9889	40	48.0111	39.0088	48.406	64.6692	local	866.37	no	NA	NA	NA	0.00950673	0.98574	0.992946
ENSRNOG00000017439	8	49.817	58	66.183	68.3353	81.8456	93.2777	local	827.079	yes	-0.0236656	0.959835	0.972941	0.142203	0.736941	0.914172
ENSRNOG00000021793	8	22.6217	36	49.3783	29.7961	43.6259	67.4447	local	203.204	no	NA	NA	NA	0.46553	0.429434	0.715695
ENSRNOG00000024291	8	48.0437	56	63.9563	64.7354	79.0515	90.1669	local	879.349	no	NA	NA	NA	-0.0787424	0.852967	0.946142
ENSRNOG00000023540	8	37.0149	46	54.9851	44.7941	60.5865	77.6336	distant	665.912	no	NA	NA	NA	-0.253447	0.62797	0.854267
ENSRNOG00000027295	8	42.6032	50	57.3968	53.6908	68.7068	81.0028	local	1022.82	no	NA	NA	NA	0.0638523	0.880602	0.953986
ENSRNOG00000010537	8	43.9807	52	60.0193	56.4872	72.7669	84.6667	local	864.462	no	NA	NA	NA	-0.153761	0.71621	0.912709
ENSRNOG00000015869	8	80.0932	88	95.9068	104.859	113.583	124.152	local	891.146	yes	-0.295632	0.51976	0.669163	-0.880455	0.000771627	0.0379751
ENSRNOG00000012962	8	73.6776	84	94.3224	99.3674	108.371	122.115	local	463.984	yes	-0.80515	0.0288932	0.112672	-0.80515	0.0288932	0.210814
ENSRNOG00000015977	8	38.4417	50	61.5583	46.4365	68.7068	86.8168	local	332.272	no	NA	NA	NA	-0.075875	0.858279	0.946142
ENSRNOG00000005713	8	0	2	11.4044	2	5.14286	19.9212	local	594.612	no	NA	NA	NA	0.524579	0.226741	0.552031
ENSRNOG00000020862	8	82.3695	94	98	106.905	121.7	126.843	local	325.848	yes	0.554175	0.196744	0.372409	0.633235	0.0671415	0.313186
ENSRNOG00000009993	8	21.0662	30	38.9338	28.7504	36.7194	47.003	local	675.201	no	NA	NA	NA	0.385722	0.392783	0.689723
ENSRNOG00000025372	8	42.7672	54	65.2328	54.0237	76.2574	91.9502	local	362.812	yes	-0.199653	0.667774	0.777847	0.224639	0.592758	0.838625
ENSRNOG00000010694	8	60.9881	68	75.0119	86.0201	95	100.394	local	1136.67	yes	0.379757	0.400768	0.589019	0.0600271	0.887719	0.95582
ENSRNOG00000019317	8	45.9044	56	66.0956	60.3924	79.0515	93.1556	local	493.306	yes	0.0624689	0.894156	0.938421	0.0650006	0.878467	0.953171
ENSRNOG00000030449	8	51.5959	60	68.4041	71.9465	84.6397	95.3109	local	779.09	yes	-0.648465	0.115153	0.276775	-0.265501	0.525085	0.786487
ENSRNOG00000026178	8	43.8291	54	64.1709	56.1794	76.2574	90.4667	local	483.371	no	NA	NA	NA	0.0906048	0.831043	0.94331
ENSRNOG00000008984	8	51.5683	62	72.4317	71.8905	87.4338	98.409	local	450.479	yes	-0.760407	0.0472055	0.15163	-0.401052	0.37256	0.681228
ENSRNOG00000010545	8	58.2981	66	73.7019	82.262	93.0221	99.3861	local	941.856	yes	-0.311482	0.496486	0.649722	0.00341155	0.993603	0.993603
ENSRNOG00000029510	8	78.5573	90	98	103.478	116.361	126.843	local	342.809	yes	0.621672	0.136117	0.300591	0.910635	0.000643084	0.0379751
ENSRNOG00000037947	8	48.1823	54	59.8177	65.0168	76.2574	84.385	local	1567.03	no	NA	NA	NA	0.23793	0.570431	0.822233
ENSRNOG00000020659	8	2.0705	16	29.9295	5.25365	25.3445	36.6383	local	175.09	no	NA	NA	NA	-0.725271	0.0651043	0.313186
ENSRNOG00000009255	8	0.475393	14	27.5246	2.74705	24	33.8701	local	195.331	no	NA	NA	NA	-0.112107	0.810875	0.937404
ENSRNOG00000020467	8	36.5535	50	63.4465	44.263	68.7068	89.4546	distant	199.497	no	NA	NA	NA	0.601961	0.114339	0.416824
ENSRNOG00000008924	8	35.0287	48	60.9713	42.5079	64.6466	85.9967	local	226.826	no	NA	NA	NA	0.457327	0.302192	0.621523
ENSRNOG00000005149	8	86.3848	98	98	111.34	126.843	126.843	local	327.2	yes	0.637009	0.123897	0.284419	0.634134	0.0666341	0.313186
ENSRNOG00000007862	8	35.7927	46	56.2073	43.3872	60.5865	79.3411	local	478.643	no	NA	NA	NA	0.265706	0.61082	0.847104
ENSRNOG00000011302	8	36.9926	50	63.0074	44.7684	68.7068	88.8413	local	224.622	no	NA	NA	NA	-0.554583	0.153695	0.480695
ENSRNOG00000020748	8	81.9916	94	98	106.565	121.7	126.843	local	294.218	yes	0.347333	0.445264	0.618663	0.453349	0.22036	0.544166
ENSRNOG00000016474	8	34.3637	48	61.6363	41.7424	64.6466	86.9257	local	189.527	no	NA	NA	NA	0.579774	0.172455	0.505624
ENSRNOG00000030625	8	84.5362	98	98	108.853	126.843	126.843	distant	198.565	yes	0.651537	0.112864	0.275026	0.421766	0.258178	0.582953
ENSRNOG00000018700	8	87.2018	98	98	112.475	126.843	126.843	local	408.021	yes	-0.378197	0.402867	0.589019	0.374809	0.320278	0.631378
ENSRNOG00000030371	8	79.9391	94	98	104.721	121.7	126.843	distant	168.981	yes	-0.479902	0.275773	0.472529	0.056925	0.884346	0.955769
ENSRNOG00000029696	9	56.477	70	83.523	73.5503	88.3714	108.026	distant	195.416	no	NA	NA	NA	0.0145705	0.981449	0.990458
ENSRNOG00000039790	9	0	4	16.2227	2	7.06757	22.5524	local	277.671	no	NA	NA	NA	0.861473	0.0605898	0.304718
ENSRNOG00000017129	9	55.9997	66	76.0003	72.9455	83.8	96.7085	local	506.178	no	NA	NA	NA	0.0794586	0.898937	0.958382
ENSRNOG00000015354	9	39.575	46	52.425	52.1373	60.277	68.4168	local	1330.28	no	NA	NA	NA	0.474345	0.419527	0.712683
ENSRNOG00000033402	9	13	18	23	18.4696	24.8041	31.1385	local	2227.28	no	NA	NA	NA	-0.637306	0.362694	0.674507
ENSRNOG00000017020	9	58.8037	70	81.1963	76.498	88.3714	104.525	local	366.41	no	NA	NA	NA	0.478783	0.414559	0.710091
ENSRNOG00000013446	9	30.2985	40	49.7015	40.3849	52.6757	64.9664	local	548.727	no	NA	NA	NA	-0.0311867	0.960298	0.983525
ENSRNOG00000025970	9	46.9818	58	69.0182	61.5208	75.4797	86.8182	local	384.467	no	NA	NA	NA	0.50102	0.389878	0.68821
ENSRNOG00000006660	9	69	74	79	86.8	93.8667	101.221	distant	2944.21	no	NA	NA	NA	-0.336847	0.579367	0.82476
ENSRNOG00000019975	9	0	12	24.364	2	17.2027	32.8666	local	267.268	no	NA	NA	NA	-0.927336	0.244186	0.576461
ENSRNOG00000019294	9	50.8288	60	69.1712	66.3946	77.8	86.9712	local	633.264	no	NA	NA	NA	-0.197983	0.749576	0.914172
ENSRNOG00000017206	9	52.1335	64	75.8665	68.0476	81.8	96.5071	local	305.724	no	NA	NA	NA	-0.70858	0.180365	0.507999
ENSRNOG00000013238	9	9.77276	18	26.2272	14.381	24.8041	35.2271	local	817.225	no	NA	NA	NA	0.438817	0.561183	0.817801
ENSRNOG00000012830	9	13.8094	26	38.1906	19.495	34.9392	50.3833	local	280.09	no	NA	NA	NA	0.888655	0.0438478	0.258215
ENSRNOG00000016470	9	69	74	79	86.8	93.8667	101.221	local	2004.56	no	NA	NA	NA	0.127866	0.837641	0.946142
ENSRNOG00000004075	10	46.0918	60	73.9082	52.5991	71.5288	88.1735	local	176.099	no	NA	NA	NA	-0.218065	0.545026	0.805843
ENSRNOG00000042912	10	59.7277	70	80.2723	71.1723	84.2222	93.477	local	470.304	yes	0.141356	0.762416	0.850696	0.325792	0.358277	0.668979
ENSRNOG00000004295	10	81.6865	92	96	94.6554	103.25	106	local	465.102	yes	0.45136	0.309353	0.49684	0.488769	0.265693	0.583238
ENSRNOG00000021412	10	52.66	60	67.34	61.9214	71.5288	81.1362	local	1038.59	no	NA	NA	NA	0.115806	0.750045	0.914172
ENSRNOG00000005659	10	42.5033	54	65.4967	46.9753	63.6754	78.7235	local	337.84	no	NA	NA	NA	0.508587	0.110149	0.407934
ENSRNOG00000033617	10	64.8727	74	83.1273	77.9067	88.25	95.8561	local	640.819	yes	-0.219523	0.63624	0.757769	0.146014	0.687318	0.898599
ENSRNOG00000013038	10	69.1869	76	82.8131	83.3188	89.9167	95.5942	distant	1197.49	yes	0.248376	0.591229	0.727543	0.0089182	0.981833	0.990458
ENSRNOG00000025981	10	50.6544	64	77.3456	59.2963	76.7644	91.038	local	205.006	yes	0.316294	0.489494	0.644787	0.679716	0.0305972	0.210814
ENSRNOG00000007454	10	29.9447	42	54.0553	31.3317	46.1866	63.7477	local	290.52	yes	0.641178	0.120677	0.284261	0.513333	0.129136	0.449366
ENSRNOG00000010316	10	24.4909	38	51.5091	26.7487	39.9179	60.415	distant	196.153	yes	-0.416975	0.35202	0.546808	-0.775873	0.0139842	0.133969
ENSRNOG00000029076	10	0	2	14.1042	4	6.41758	18.7963	local	286.703	yes	0.63589	0.124769	0.284419	0.245358	0.595891	0.839609
ENSRNOG00000006519	10	28.1585	42	55.8415	29.8307	46.1866	66.0858	local	179.302	yes	-0.291978	0.525178	0.67071	-0.454039	0.187459	0.510511
ENSRNOG00000000443	10	48.5305	62	75.4695	56.4209	74.1466	89.4746	distant	198.259	no	NA	NA	NA	-0.571449	0.0844001	0.358961
ENSRNOG00000003349	10	30.6441	36	41.3559	31.9194	36.7836	45.1772	local	1775.36	yes	0.837086	0.0188085	0.0946	0.249431	0.551354	0.809985
ENSRNOG00000031154	10	0	2	14.1113	4	6.41758	18.8017	local	286.157	yes	0.160875	0.73041	0.830549	0.869235	0.0110551	0.122854
ENSRNOG00000015787	10	65.4877	78	90.5123	78.7116	91.5833	102.01	local	256.769	yes	0.439842	0.323382	0.514079	0.244669	0.559225	0.817801
ENSRNOG00000007606	10	56.3168	66	75.6832	66.7079	79.3822	89.6526	local	551.455	no	NA	NA	NA	-0.368605	0.29459	0.616504
ENSRNOG00000005097	10	30.6045	44	57.3955	31.8861	49.3209	68.1198	local	202.263	yes	0.421435	0.346354	0.543904	-0.360706	0.305852	0.621811
ENSRNOG00000024445	10	5.62603	16	26.374	10.8007	20.2345	28.3311	local	457.564	yes	-0.273112	0.553447	0.690181	-0.326245	0.430311	0.715695
ENSRNOG00000014354	10	70.3562	82	93.6438	84.618	94.9167	104.62	local	324.683	yes	-0.0672054	0.886166	0.934663	-0.364521	0.374655	0.681228
ENSRNOG00000028699	10	36.2974	50	63.7026	37.2497	58.4398	76.3751	local	186.16	yes	0.31617	0.489673	0.644787	0.26454	0.406028	0.704669
ENSRNOG00000003397	10	40.8445	52	63.1555	44.3758	61.0576	75.659	local	370.472	no	NA	NA	NA	-0.581547	0.0473217	0.263601
ENSRNOG00000016545	10	2.53291	12	21.4671	7.06176	17.2	24.3819	local	584.614	yes	0.1934	0.67778	0.778464	-0.386218	0.304558	0.621811
ENSRNOG00000016774	10	0	10	21.0757	4	15.6828	24.085	local	378.553	yes	-0.193412	0.67776	0.778464	-0.417426	0.263626	0.582953
ENSRNOG00000030750	10	32.6121	46	59.3879	33.5732	52.4552	70.7276	local	202.681	yes	-0.19244	0.67932	0.778464	0.111416	0.744321	0.914172
ENSRNOG00000043295	10	65.2427	74	82.7573	78.391	88.25	95.5477	distant	708.226	yes	0.106117	0.820862	0.892424	0.444568	0.197992	0.520672
ENSRNOG00000003276	10	33.7853	46	58.2147	34.5591	52.4552	69.192	local	278.27	yes	-0.715378	0.0707094	0.18281	-0.622436	0.0408366	0.24681
ENSRNOG00000024535	10	36.656	48	59.344	37.8116	55.5896	70.6702	local	352.072	yes	0.0465386	0.921079	0.961915	-0.141459	0.661001	0.877776
ENSRNOG00000002458	10	60.5047	66	71.4953	72.1894	79.3822	85.8837	local	1709.64	no	NA	NA	NA	0.53921	0.107736	0.407934
ENSRNOG00000038328	10	29.953	40	50.047	31.3386	43.0522	58.5013	local	499.821	yes	-0.594758	0.158967	0.327194	-0.169618	0.639452	0.862196
ENSRNOG00000002610	10	0	6	13.2751	4	11.2527	18.1673	local	1057.04	yes	-0.0312638	0.946951	0.972941	-0.927174	0.000913623	0.0380458
ENSRNOG00000002615	10	0	2	14.5045	4	6.41758	19.1	local	257.316	yes	-0.519908	0.231659	0.423377	-0.423806	0.343358	0.645681
ENSRNOG00000003232	10	75.5232	84	92.4768	89.5193	96.5833	103.647	distant	763.935	yes	0.357865	0.430613	0.612684	0.111405	0.792838	0.930605
ENSRNOG00000002714	10	0	2	14.5528	4	6.41758	19.1366	local	253.981	yes	0.618785	0.138483	0.300846	0.353137	0.437167	0.722321
ENSRNOG00000002358	10	44.3309	56	67.6691	49.8395	66.2932	81.5669	local	322.469	no	NA	NA	NA	0.427757	0.189388	0.511718
ENSRNOG00000019308	10	35.2313	48	60.7687	35.7742	55.5896	72.5349	local	239.59	yes	0.157133	0.736524	0.830549	0.134672	0.676464	0.891174
ENSRNOG00000016475	10	64.4889	74	83.5111	77.4043	88.25	96.1759	local	577.725	yes	-0.350912	0.440264	0.618663	0.189867	0.599317	0.840997
ENSRNOG00000039510	10	2.84924	16	29.1508	7.44413	20.2345	30.6645	local	216.09	yes	0.415923	0.353362	0.546808	-0.551723	0.156278	0.480695
ENSRNOG00000003721	10	1.84467	12	22.1553	6.22982	17.2	24.904	local	485.407	yes	-0.243655	0.598526	0.729239	-0.584978	0.0980053	0.39956
ENSRNOG00000003326	10	0	4	15.7856	4	8.83516	20.0719	local	312.473	yes	0.804083	0.0292728	0.112672	0.756252	0.0491593	0.266699
ENSRNOG00000010320	10	38.528	52	65.472	40.7454	61.0576	78.6911	local	198.125	no	NA	NA	NA	0.0979303	0.762055	0.920547
ENSRNOG00000031440	10	82.179	96	96	95.0658	106	106	distant	180.297	yes	0.460255	0.298705	0.492896	0.44154	0.321298	0.631378
ENSRNOG00000005024	10	36.796	50	63.204	38.0311	58.4398	75.7225	local	213.006	yes	0.284592	0.536187	0.673555	-0.370651	0.235591	0.56232
ENSRNOG00000039002	10	17.3697	26	34.6303	21.2736	28.0168	35.2692	local	732.948	yes	-0.734305	0.0602036	0.167815	-0.376888	0.317384	0.630195
ENSRNOG00000002818	10	62.9188	74	85.0812	75.3493	88.25	97.4843	local	377.997	yes	0.210088	0.651163	0.766925	0.0315373	0.931081	0.970521
ENSRNOG00000003661	10	83.1901	90	96	95.9084	101.583	106	local	1198.55	yes	-0.406081	0.36602	0.562292	-0.46489	0.293222	0.616504
ENSRNOG00000007869	10	44.7605	54	63.2395	50.5128	63.6754	75.7689	local	621.685	no	NA	NA	NA	-0.0588995	0.863423	0.946577
ENSRNOG00000029377	10	78.336	92	96	91.8634	103.25	106	distant	188.113	yes	-0.509853	0.242413	0.439245	-0.541998	0.20884	0.530963
ENSRNOG00000014819	10	57.9931	72	86.0069	68.902	86.4444	98.2557	local	171.466	yes	-0.0914725	0.84536	0.901492	-0.0247236	0.94595	0.980356
ENSRNOG00000009112	10	38.602	52	65.398	40.8613	61.0576	78.5943	distant	202.126	no	NA	NA	NA	0.0851052	0.792571	0.930605
ENSRNOG00000031332	10	76.4027	90	96	90.2522	101.583	106	distant	191.53	yes	-0.489877	0.264444	0.469861	-0.538586	0.212292	0.533433
ENSRNOG00000016924	10	65.9241	78	90.0759	79.2829	91.5833	101.647	local	288.905	yes	0.459345	0.299787	0.492896	0.399799	0.326426	0.638943
ENSRNOG00000020277	10	62.7679	76	89.2321	75.1517	89.9167	100.943	local	211.393	yes	-0.732785	0.0610136	0.167815	-0.116384	0.765564	0.920547
ENSRNOG00000018366	10	30.6455	44	57.3545	31.9206	49.3209	68.0661	distant	204.518	yes	0.0104406	0.982277	0.982277	-0.785025	0.00714276	0.10471
ENSRNOG00000036729	10	81.7259	94	96	94.6882	104.917	106	local	273.838	yes	-0.584662	0.167996	0.337005	-0.584662	0.167996	0.498919
ENSRNOG00000017781	10	63.4408	76	88.5592	76.0325	89.9167	100.383	local	253.539	yes	-0.21528	0.642939	0.761469	-0.16012	0.680696	0.893333
ENSRNOG00000021685	10	30.5961	44	57.4039	31.8791	49.3209	68.1308	local	201.806	yes	0.0909647	0.846212	0.901492	0.283668	0.427044	0.715695
ENSRNOG00000002928	10	31.9679	44	56.0321	33.0319	49.3209	66.3352	local	292.347	yes	-0.14278	0.760073	0.850696	0.271845	0.44737	0.730421
ENSRNOG00000003177	10	12.0217	24	35.9783	17.2165	26.3361	36.7496	local	296.631	yes	0.727234	0.0640221	0.169659	0.276374	0.507582	0.777164
ENSRNOG00000003256	10	20.1824	28	35.8176	23.4073	29.6975	36.4978	local	912.857	yes	-0.132822	0.776498	0.861872	0.223924	0.56246	0.817801
ENSRNOG00000033508	10	39.9821	54	68.0179	43.0242	63.6754	82.0199	local	170.959	no	NA	NA	NA	0.166393	0.624858	0.8536
ENSRNOG00000028404	10	66.6536	76	85.3464	80.2377	89.9167	97.7053	local	604.032	yes	0.483432	0.271739	0.472202	0.125595	0.74748	0.914172
ENSRNOG00000018526	10	42.5244	52	61.4756	47.0083	61.0576	73.4603	local	583.26	no	NA	NA	NA	0.0183648	0.954826	0.983525
ENSRNOG00000033517	10	44.2529	58	71.7471	49.7173	68.911	86.1634	distant	183.935	no	NA	NA	NA	-0.693555	0.017937	0.160501
ENSRNOG00000003147	10	31	36	41	32.2185	36.7836	44.6194	local	2016.51	yes	0.729399	0.0628394	0.168632	0.161737	0.70199	0.907235
ENSRNOG00000003905	10	72.6551	82	91.3449	87.1293	94.9167	102.704	local	604.274	yes	0.294922	0.520811	0.669163	0.0304353	0.942969	0.980356
ENSRNOG00000004741	10	69.7932	76	82.2068	83.9924	89.9167	95.089	local	1410.9	yes	-0.331008	0.468335	0.640561	0.0143959	0.970678	0.983525
ENSRNOG00000030371	10	46.7999	60	73.2001	53.7087	71.5288	87.5834	distant	213.227	yes	-0.366937	0.418144	0.607168	-0.664709	0.0360047	0.237865
ENSRNOG00000002145	11	36.6992	46	55.3008	55.2097	66.087	80.8346	local	611.472	no	NA	NA	NA	-0.0712801	0.893261	0.957165
ENSRNOG00000021555	11	8.54744	22	35.4526	17.4329	36.5455	53.8974	local	199.17	no	NA	NA	NA	-0.178956	0.773368	0.923733
ENSRNOG00000014180	11	36.0932	50	56	54.5718	72	81	distant	176.167	no	NA	NA	NA	-0.608191	0.200198	0.521933
ENSRNOG00000031801	11	44.5131	56	56	64.3091	81	81	local	338.734	no	NA	NA	NA	-0.0656563	0.901657	0.958706
ENSRNOG00000001890	11	46.6968	56	56	66.9201	81	81	local	611.073	no	NA	NA	NA	-0.189261	0.719498	0.912709
ENSRNOG00000026458	11	44.5238	56	56	64.3219	81	81	local	339.717	no	NA	NA	NA	0.811062	0.0501741	0.270078
ENSRNOG00000001963	11	24.1076	34	43.8924	39.7388	52.3684	63.567	distant	521.152	no	NA	NA	NA	0.30451	0.618364	0.8536
ENSRNOG00000043107	11	24.1087	38	51.8913	39.7404	56.5789	75.1522	local	176.905	no	NA	NA	NA	0.0645764	0.917836	0.964008
ENSRNOG00000032165	11	15.1776	24	32.8224	26.3013	39.5758	51.1288	local	695.84	no	NA	NA	NA	0.33829	0.577638	0.824002
ENSRNOG00000011040	11	20.1696	28	35.8304	33.7721	45.6364	54.2952	distant	909.71	no	NA	NA	NA	-0.963094	0.00846373	0.115476
ENSRNOG00000027797	11	14.579	26	37.421	25.5005	42.6061	55.9695	local	344.82	no	NA	NA	NA	0.632256	0.252412	0.57828
ENSRNOG00000001766	11	43.3649	54	56	62.9363	78.6667	81	local	426.394	no	NA	NA	NA	-0.389542	0.445242	0.730421
ENSRNOG00000007387	11	34.9888	48	56	53.4092	68.6667	81	distant	224.391	no	NA	NA	NA	-0.481178	0.333937	0.64497
ENSRNOG00000039017	11	26.3403	40	53.6597	43.1216	58.913	78.0996	local	188.328	no	NA	NA	NA	-0.617629	0.266951	0.583238
ENSRNOG00000001911	11	41.4827	54	56	60.6859	78.6667	81	local	256.427	no	NA	NA	NA	-0.431098	0.393412	0.689723
ENSRNOG00000042289	11	30.6426	40	49.3574	48.8343	58.913	70.9291	local	602.234	no	NA	NA	NA	-0.961734	0.00893384	0.115476
ENSRNOG00000001090	12	0	2	14.8157	8	9.5873	19.0279	local	236.564	no	NA	NA	NA	0.991429	0.0834114	0.356959
ENSRNOG00000006595	12	0	6	19.4431	8	12.7619	22.201	distant	199.68	no	NA	NA	NA	0.998903	0.00109665	0.0397681
ENSRNOG00000030712	12	7.28609	20	32.7139	13.7215	22.5829	32.0969	distant	243.162	no	NA	NA	NA	0.143819	0.908123	0.960853
ENSRNOG00000001349	12	7	12	17	13.5122	17.0971	20.5257	local	2286.21	no	NA	NA	NA	0.30108	0.69892	0.907235
ENSRNOG00000001353	12	0	12	24.4561	8	17.0971	25.6385	local	260.71	no	NA	NA	NA	-0.614564	0.385436	0.68821
ENSRNOG00000001251	12	0	8	21.9098	8	14.2439	23.8924	local	176.025	no	NA	NA	NA	-0.825399	0.174601	0.507999
ENSRNOG00000030410	12	0	4	15.0529	8	11.1746	19.1906	local	380.878	no	NA	NA	NA	0.431509	0.568491	0.821154
ENSRNOG00000001344	12	29.1052	42	46	29.0257	39.525	42	local	231.559	no	NA	NA	NA	0.248421	0.751579	0.914172
ENSRNOG00000043351	12	31.1089	44	46	30.731	41.025	42	local	231.796	no	NA	NA	NA	0.28233	0.71767	0.912709
ENSRNOG00000000923	12	10.868	24	37.132	16.3209	25.3257	35.857	local	217.186	no	NA	NA	NA	-0.997454	0.0454377	0.263081
ENSRNOG00000040092	12	0	2	15.1442	8	9.5873	19.2532	local	216.47	no	NA	NA	NA	-0.917217	0.26086	0.582953
ENSRNOG00000000939	12	0	2	12.5127	8	9.5873	17.4487	local	440.73	no	NA	NA	NA	-0.987697	0.0999649	0.399581
ENSRNOG00000000040	13	22.1161	34	45.8839	57.189	73.7887	91.1443	local	304.287	no	NA	NA	NA	-0.320336	0.439195	0.723936
ENSRNOG00000003018	13	39.9956	50	54	82.9661	96.8611	102	local	505.621	no	NA	NA	NA	0.780667	0.0130308	0.132033
ENSRNOG00000027017	13	23.9467	32	40.0533	59.7316	70.7391	83.0462	local	856.553	no	NA	NA	NA	-0.553854	0.154351	0.480695
ENSRNOG00000002538	13	0	12	24.9545	29	45.7971	61.1313	local	227.857	no	NA	NA	NA	-0.132898	0.733215	0.914172
ENSRNOG00000002775	13	18.4851	30	41.5149	52.3762	68.1304	85.0762	local	336.19	no	NA	NA	NA	-0.449506	0.263826	0.582953
ENSRNOG00000002826	13	29.6485	42	54	67.6507	85.75	102	local	268.176	no	NA	NA	NA	-0.77016	0.0151801	0.141339
ENSRNOG00000032058	13	40.9456	46	51.0544	84.2855	91.3056	98.3256	distant	1926.26	no	NA	NA	NA	0.855032	0.00330475	0.0711555
ENSRNOG00000023130	13	44.3851	54	54	89.0627	102	102	local	561.726	no	NA	NA	NA	0.756142	0.0183994	0.162528
ENSRNOG00000002710	13	38.46	52	54	80.6986	99.6389	102	local	194.522	no	NA	NA	NA	0.889144	0.00133795	0.0445876
ENSRNOG00000004737	13	44.0135	52	54	88.5466	99.6389	102	distant	872.184	no	NA	NA	NA	0.803722	0.00905039	0.115476
ENSRNOG00000003515	13	41.059	54	54	84.4431	102	102	local	228.691	no	NA	NA	NA	-0.840514	0.0045471	0.0837949
ENSRNOG00000004162	13	0	12	24.1504	29	45.7971	60.0144	local	283.149	no	NA	NA	NA	0.0780293	0.841844	0.946142
ENSRNOG00000008137	13	1.66162	12	22.3384	20.8229	45.7971	57.4977	local	461.986	no	NA	NA	NA	-0.459911	0.212909	0.533433
ENSRNOG00000003291	13	40.3824	46	51.6176	83.5034	91.3056	99.1077	distant	1654.07	no	NA	NA	NA	-0.825252	0.00616308	0.0952541
ENSRNOG00000004424	13	0	8	19.4449	29	41.7391	53.479	local	342.608	no	NA	NA	NA	0.42399	0.25541	0.580785
ENSRNOG00000003308	13	42.2302	52	54	86.0697	99.6389	102	local	538.766	no	NA	NA	NA	0.835618	0.00502923	0.0866285
ENSRNOG00000003795	13	41.912	54	54	85.6278	102	102	local	287.965	no	NA	NA	NA	-0.864422	0.00263951	0.0606207
ENSRNOG00000003767	13	42.3397	54	54	86.2218	102	102	local	323.237	no	NA	NA	NA	-0.900136	0.000938721	0.0380458
ENSRNOG00000002627	13	40.318	54	54	83.4138	102	102	local	187.196	no	NA	NA	NA	-0.823846	0.00632908	0.0952541
ENSRNOG00000004553	13	44.8091	54	54	89.6515	102	102	local	629.9	no	NA	NA	NA	0.866647	0.00249663	0.0606207
ENSRNOG00000003953	13	0	8	21.0965	29	41.7391	55.773	local	219.279	no	NA	NA	NA	0.391379	0.297579	0.616504
ENSRNOG00000002369	13	17.2965	26	34.7035	51.1704	62.5833	74.8786	local	718.557	no	NA	NA	NA	-0.701945	0.0787188	0.34546
ENSRNOG00000007705	13	36.2321	50	54	77.2469	96.8611	102	local	182.904	no	NA	NA	NA	-0.864665	0.00262366	0.0606207
ENSRNOG00000000657	13	14.9977	20	25.0023	48.8382	54.25	61.1977	local	1953.27	no	NA	NA	NA	0.356138	0.386557	0.68821
ENSRNOG00000003312	13	3.39478	14	24.6052	35.4277	47.8261	60.6461	local	429.851	no	NA	NA	NA	-0.391874	0.336994	0.645316
ENSRNOG00000002158	14	0	2	11.6941	1	3.84211	17.618	local	549.819	no	NA	NA	NA	-0.546102	0.161423	0.489958
ENSRNOG00000030216	14	0	2	15.5558	1	3.84211	23.1056	local	193.692	no	NA	NA	NA	-0.357384	0.384776	0.68821
ENSRNOG00000027463	14	2.0891	14	25.9109	3.96873	20.8947	36.1305	local	302.075	no	NA	NA	NA	-0.524498	0.182042	0.507999
ENSRNOG00000002137	14	7.57352	20	32.4265	11.7624	29.1765	53.0077	local	262.801	no	NA	NA	NA	0.329205	0.387003	0.68821
ENSRNOG00000001960	14	14.9175	22	29.0825	22.1985	31.5294	41.0629	local	1115.11	no	NA	NA	NA	0.417539	0.229903	0.555801
ENSRNOG00000005106	14	33.7585	42	50.2415	57.1378	69.5	78.7243	local	814.089	no	NA	NA	NA	0.139699	0.700303	0.907235
ENSRNOG00000004670	14	52.3728	58	63.6272	81.6845	88.618	93.6761	local	1649.79	no	NA	NA	NA	-0.269303	0.483464	0.756096
ENSRNOG00000008474	14	42.6569	56	69.3431	70.4854	86.7222	98.814	local	205.148	no	NA	NA	NA	-0.222162	0.56562	0.820115
ENSRNOG00000000043	14	0	2	9.20771	1	3.84211	14.0846	local	1076.85	no	NA	NA	NA	0.561533	0.147517	0.47718
ENSRNOG00000002345	14	2.72214	16	29.2779	4.8683	23.7368	41.441	local	208.798	no	NA	NA	NA	-0.736398	0.0590979	0.299401
ENSRNOG00000030149	14	16.9048	30	43.0952	25.0226	42.8387	71.1428	local	219.357	no	NA	NA	NA	-0.184346	0.61017	0.847104
ENSRNOG00000006400	14	41.5082	54	66.4918	68.7624	83.9444	96.251	local	258.201	no	NA	NA	NA	0.0215317	0.952921	0.983525
ENSRNOG00000002129	14	0	6	18.7429	1	9.52632	27.6347	local	241.262	no	NA	NA	NA	-0.520612	0.185892	0.508641
ENSRNOG00000028498	14	39.0147	50	60.9853	65.0221	78.3889	91.3014	local	387.908	no	NA	NA	NA	0.13034	0.719675	0.912709
ENSRNOG00000015093	14	2.74495	10	17.255	4.90072	15.2105	25.5203	local	1062.75	no	NA	NA	NA	-0.263286	0.528677	0.790149
ENSRNOG00000030371	14	58.3933	72	74	88.9715	101.202	103	distant	191.047	no	NA	NA	NA	0.334039	0.418709	0.712683
ENSRNOG00000017286	15	23.9527	32	40.0473	37.6951	56.781	65.7594	local	857.936	no	NA	NA	NA	0.158398	0.734455	0.914172
ENSRNOG00000010319	15	25.2112	34	42.7888	39.5459	59.0124	68.8181	local	702.224	no	NA	NA	NA	0.102254	0.827314	0.94331
ENSRNOG00000008855	15	17.4477	26	34.5523	27.9965	40.7059	59.6286	local	748.513	no	NA	NA	NA	0.256807	0.623257	0.8536
ENSRNOG00000004516	15	58.7867	72	72	87.2085	104	104	local	212.467	yes	0.533517	0.173271	0.337005	0.662476	0.104908	0.407934
ENSRNOG00000005783	15	0	2	15.0698	9	10.8182	24.4408	local	220.868	no	NA	NA	NA	0.854271	0.0303079	0.210814
ENSRNOG00000009278	15	11.9212	24	36.0788	19.8375	37.7647	61.3317	local	288.68	no	NA	NA	NA	0.0584433	0.912435	0.962737
ENSRNOG00000020246	15	50.429	64	72	77.3423	93.8841	104	distant	192.899	yes	-0.278268	0.504556	0.656233	-0.278268	0.504556	0.776232
ENSRNOG00000013101	15	28.3727	42	55.6273	44.1951	67.938	83.163	local	189.987	yes	0.581082	0.130885	0.295187	0.332834	0.465733	0.747772
ENSRNOG00000038012	15	50.9696	64	72	77.9454	93.8841	104	local	223.232	yes	0.315522	0.446488	0.618663	0.315522	0.446488	0.730421
ENSRNOG00000042960	15	18.7242	32	45.2758	29.9053	56.781	71.5929	local	208.912	no	NA	NA	NA	-0.209719	0.651748	0.868881
ENSRNOG00000009481	15	5.55143	14	22.4486	14.0468	22.8411	35.4745	local	769.787	no	NA	NA	NA	-0.756592	0.0816605	0.353862
ENSRNOG00000025625	15	0	10	22.7038	9	18.0909	35.8561	local	243.828	no	NA	NA	NA	-0.853694	0.0305421	0.210814
ENSRNOG00000009512	15	24.0407	36	47.9593	37.8246	61.2438	74.5868	local	298.165	yes	0.787833	0.0202385	0.0946	0.941893	0.00151483	0.045379
ENSRNOG00000012325	15	0	2	14.2274	9	10.8182	23.1811	local	277.322	no	NA	NA	NA	-0.834701	0.0387275	0.239518
ENSRNOG00000009982	15	12.5128	18	23.4872	20.6172	28.8224	37.0106	local	1713.34	no	NA	NA	NA	-0.780247	0.0671311	0.313186
ENSRNOG00000018366	15	31.9637	46	60.0363	56.7405	72.4008	88.8086	distant	170.112	yes	-0.34546	0.401953	0.589019	-0.288743	0.529991	0.790398
ENSRNOG00000033517	15	29	34	39	45.1176	59.0124	64.5909	distant	2014.17	no	NA	NA	NA	-0.105859	0.821293	0.941631
ENSRNOG00000001049	15	23.7468	34	44.2532	37.3923	59.0124	70.452	local	472.742	no	NA	NA	NA	0.449192	0.311974	0.624855
ENSRNOG00000030371	15	34.6033	48	61.3967	59.6855	74.6322	90.5506	distant	202.201	yes	-0.535238	0.171624	0.337005	-0.30774	0.501947	0.775429
ENSRNOG00000024837	16	51.1566	58	62	75.4011	82.1525	86	distant	1188.15	no	NA	NA	NA	0.182409	0.817591	0.941631
ENSRNOG00000011754	16	54.7057	62	62	78.9024	86	86	local	1051.55	no	NA	NA	NA	0.571133	0.428867	0.715695
ENSRNOG00000021726	16	6.24003	20	33.76	9.76331	33.8065	60.68	local	183.296	no	NA	NA	NA	0.772449	0.0717782	0.319066
ENSRNOG00000018822	16	0	10	23.1149	0	15.6463	46.3772	local	218.193	no	NA	NA	NA	-0.678963	0.138054	0.465262
ENSRNOG00000016281	16	47.1657	60	62	71.4639	84.1256	86	local	235.377	no	NA	NA	NA	-0.148408	0.851592	0.946142
ENSRNOG00000012739	16	39.7246	52	62	64.1229	76.2332	86	local	273.742	no	NA	NA	NA	0.144248	0.855752	0.946142
ENSRNOG00000021693	16	8.36168	18	27.6383	13.0829	29.0612	51.9634	local	558.178	no	NA	NA	NA	0.609592	0.198875	0.521007
ENSRNOG00000038365	16	51.2836	60	62	75.5264	84.1256	86	distant	716.045	no	NA	NA	NA	0.0796494	0.920351	0.965177
ENSRNOG00000003214	16	22.12	36	49.88	43.3807	62.0714	74.1417	distant	177.447	no	NA	NA	NA	0.417363	0.410306	0.706752
ENSRNOG00000009660	16	16.6729	26	35.3271	26.6238	49.5921	61.7109	local	607.165	no	NA	NA	NA	-0.727637	0.0638011	0.313186
ENSRNOG00000023972	16	47.9474	62	62	72.2351	86	86	local	169.361	no	NA	NA	NA	0.52898	0.47102	0.747772
ENSRNOG00000011263	16	0	4	12.5461	0	6.2585	19.63	local	749.765	no	NA	NA	NA	-0.442182	0.379956	0.687113
ENSRNOG00000014605	16	50.39	62	62	74.6448	86	86	local	327.655	no	NA	NA	NA	0.548174	0.451826	0.735954
ENSRNOG00000042426	16	10.9599	24	37.0401	17.1482	47.1818	62.6286	local	222.651	no	NA	NA	NA	0.583683	0.168884	0.499403
ENSRNOG00000011407	16	36.9696	50	62	62.5908	74.2601	86	distant	223.23	no	NA	NA	NA	-0.268444	0.731556	0.914172
ENSRNOG00000024411	16	8.51849	18	27.4815	13.3282	29.0612	51.7364	local	582.33	no	NA	NA	NA	-0.741169	0.0918203	0.383419
ENSRNOG00000010780	16	27.3875	36	44.6125	51.6003	62.0714	68.9451	local	736.483	no	NA	NA	NA	0.0876531	0.868857	0.946577
ENSRNOG00000010437	16	0	6	17.7036	0	9.38776	28.5168	local	319.478	no	NA	NA	NA	0.481681	0.333357	0.64497
ENSRNOG00000011625	16	33.9465	48	62	60.9287	72.287	86	local	169.323	no	NA	NA	NA	0.0351032	0.964897	0.983525
ENSRNOG00000010814	16	0	6	19.5803	0	9.38776	31.9638	local	192.414	no	NA	NA	NA	-0.480151	0.335122	0.64497
ENSRNOG00000000551	16	0	2	15.0067	0	3.12925	23.5633	distant	224.666	no	NA	NA	NA	-0.3388	0.511245	0.777682
ENSRNOG00000018170	16	0	4	16.7075	0	6.2585	26.6872	local	243.585	no	NA	NA	NA	-0.531006	0.278354	0.591932
ENSRNOG00000040205	16	0	4	17.9868	0	6.2585	29.0369	local	172.403	no	NA	NA	NA	-0.371759	0.468051	0.747772
ENSRNOG00000010984	16	0	2	14.7686	0	3.12925	23.1259	local	239.596	no	NA	NA	NA	0.404977	0.425744	0.715695
ENSRNOG00000013061	16	17.9604	32	46.0396	28.9884	58.2763	70.353	local	169.957	no	NA	NA	NA	-0.00453655	0.993195	0.993603
ENSRNOG00000019629	16	50.9752	62	62	75.2221	86	86	local	383.778	no	NA	NA	NA	0.53325	0.46675	0.747772
ENSRNOG00000016217	17	20.3595	34	47.6405	39.9181	58.0625	76.8182	local	189.311	no	NA	NA	NA	-0.952031	0.000266105	0.0298765
ENSRNOG00000016225	17	0	4	16.9103	21	24.7168	36.7131	local	230.597	no	NA	NA	NA	0.703364	0.0515983	0.271383
ENSRNOG00000031154	17	26.0715	40	53.9285	47.1607	66.3125	85.4643	distant	175.134	no	NA	NA	NA	0.26686	0.522885	0.786487
ENSRNOG00000017577	17	19.8509	32	44.1491	39.4455	55.3125	72.0175	distant	283.247	no	NA	NA	NA	0.0697502	0.869642	0.946577
ENSRNOG00000018141	17	7.32303	20	32.677	27.8046	39.5841	56.2433	local	245.599	no	NA	NA	NA	-0.260316	0.533509	0.793926
ENSRNOG00000013438	17	14.2171	24	33.7829	34.2105	44.2105	57.764	local	536.858	no	NA	NA	NA	0.34056	0.409105	0.706449
ENSRNOG00000016587	17	0	2	11.9149	21	22.8584	32.0714	local	517.98	no	NA	NA	NA	-0.438023	0.277711	0.591932
ENSRNOG00000017644	17	38.6101	52	60	64.4015	82.8125	93	local	202.573	no	NA	NA	NA	0.335073	0.343926	0.645681
ENSRNOG00000016497	17	10.3968	24	37.6032	30.6607	44.2105	63.0169	local	191.225	no	NA	NA	NA	0.295274	0.477699	0.754896
ENSRNOG00000043448	17	48.7083	60	60	78.2865	93	93	local	357.087	no	NA	NA	NA	-0.0340437	0.925616	0.967604
ENSRNOG00000043108	17	49.782	60	60	79.7628	93	93	local	477.267	no	NA	NA	NA	-0.146597	0.686122	0.898599
ENSRNOG00000029792	17	0	2	15.1591	21	22.8584	35.0859	local	215.601	no	NA	NA	NA	-0.634297	0.0911879	0.383101
ENSRNOG00000008666	17	54.4778	60	60	86.2194	93	93	local	1697.33	no	NA	NA	NA	0.0460226	0.899538	0.958382
ENSRNOG00000017250	17	0	2	13.3635	21	22.8584	33.4174	local	350.229	no	NA	NA	NA	-0.12124	0.774892	0.923733
ENSRNOG00000016410	17	0	2	15.7351	21	22.8584	35.6211	local	184.53	no	NA	NA	NA	0.053456	0.899961	0.958382
ENSRNOG00000018343	17	0	2	10.8488	21	22.8584	31.0807	local	690.895	no	NA	NA	NA	-0.112025	0.791704	0.930605
ENSRNOG00000030371	17	23.2993	36	48.7007	43.1041	60.8125	78.276	distant	244.028	no	NA	NA	NA	-0.463542	0.247336	0.576686
ENSRNOG00000039463	18	13.9066	20	26.0934	22.0101	39.6585	52.0556	local	1455.33	yes	0.588433	0.0955545	0.241161	0.567862	0.110711	0.407934
ENSRNOG00000039415	18	15.5107	26	36.4893	24.4781	51.8814	60.829	local	443.531	yes	0.417147	0.263979	0.469861	0.417147	0.263979	0.582953
ENSRNOG00000030352	18	7.8973	22	36.1027	12.7651	44.4237	60.523	local	167.085	yes	-0.338452	0.372983	0.564803	-0.392446	0.296146	0.616504
ENSRNOG00000006595	18	0	8	20.2887	1	12.9231	40.7852	distant	272.761	yes	0.749749	0.0200068	0.0946	0.823591	0.00635949	0.0952541
ENSRNOG00000017067	18	44.8965	52	59.1035	67.4847	74.2826	85.8645	local	1108.68	no	NA	NA	NA	-0.245851	0.523702	0.786487
ENSRNOG00000030388	18	10.9621	18	25.0379	17.4802	31.8537	50.0875	local	1128.75	yes	-0.717112	0.0296687	0.112672	-0.678929	0.0443299	0.258841
ENSRNOG00000031197	18	0	2	14.0314	1	3.72727	22.2022	local	292.399	yes	-0.206655	0.593702	0.727543	-0.0882584	0.821365	0.941631
ENSRNOG00000027271	18	49.3738	56	60	71.0293	80.8043	87	distant	1259.51	no	NA	NA	NA	-0.0153456	0.968744	0.983525
ENSRNOG00000039455	18	10.8859	22	33.1141	17.3629	44.4237	58.157	local	374.633	yes	-0.44526	0.229737	0.423377	-0.457757	0.215339	0.537567
ENSRNOG00000034126	18	8.53104	16	23.469	13.7401	25.2308	47.1625	local	1003.03	yes	-0.645191	0.0605899	0.167815	-0.652453	0.0568153	0.289968
ENSRNOG00000019826	18	9.54245	20	30.4575	15.2961	39.6585	56.0539	local	447.35	yes	0.47221	0.199326	0.373957	0.519941	0.151338	0.480517
ENSRNOG00000019822	18	0	2	16.0367	1	3.72727	25.2873	distant	170.09	yes	0.282425	0.461532	0.635356	-0.412532	0.269842	0.583238
ENSRNOG00000015546	18	4.98193	18	31.0181	8.27989	31.8537	56.4976	local	223.977	yes	-0.768815	0.0154712	0.0886458	-0.71591	0.0300732	0.210814
ENSRNOG00000019063	18	44.1305	56	60	66.8783	80.8043	87	distant	305.476	no	NA	NA	NA	0.124505	0.749615	0.914172
ENSRNOG00000004033	18	12.1261	26	39.8739	19.271	51.8814	63.5085	local	177.741	yes	-0.522051	0.149392	0.316938	-0.522051	0.149392	0.478343
ENSRNOG00000012795	18	0	2	14.1524	1	3.72727	22.3882	local	282.998	yes	-0.386834	0.303721	0.492896	-0.326889	0.390551	0.68821
ENSRNOG00000017840	18	6.73947	18	29.2605	10.9838	31.8537	55.1063	local	360.102	yes	-0.0250888	0.948916	0.972941	-0.131153	0.736618	0.914172
ENSRNOG00000018053	18	28.4669	42	55.5331	54.4779	65.1917	80.0431	local	194.881	yes	0.569241	0.109652	0.270306	0.561154	0.246621	0.576686
ENSRNOG00000002697	18	0	2	11.8172	1	3.72727	18.7956	local	531.891	yes	0.0851834	0.827512	0.895064	0.135114	0.728901	0.914172
ENSRNOG00000015225	18	18.2656	30	41.7344	32.8902	55.6917	64.9814	local	316.831	yes	-0.190037	0.624322	0.752024	-0.194599	0.644235	0.866949
ENSRNOG00000023376	18	0	4	15.8331	1	6.76923	24.974	local	308.491	yes	0.32228	0.397659	0.589019	0.414047	0.26791	0.583238
ENSRNOG00000019276	18	13.3024	20	26.6976	21.0807	39.6585	53.0772	local	1235.46	yes	-0.665473	0.0504288	0.15514	-0.633283	0.0671141	0.313186
ENSRNOG00000029262	18	53.2392	60	60	76.3031	87	87	distant	1214.62	no	NA	NA	NA	0.0920431	0.828391	0.94331
ENSRNOG00000000157	18	10.9038	22	33.0962	17.3905	44.4237	58.1428	local	376.464	yes	0.520314	0.150994	0.316938	0.534237	0.138431	0.465262
ENSRNOG00000005796	18	8.34905	20	31.651	13.4601	39.6585	56.9987	local	324.054	yes	0.520524	0.150799	0.316938	0.583695	0.0989258	0.399581
ENSRNOG00000017091	18	5.61813	16	26.3819	9.25865	25.2308	52.5933	local	456.588	yes	-0.49804	0.172422	0.337005	-0.541556	0.132082	0.455024
ENSRNOG00000043440	18	54.2867	60	60	78.0109	87	87	distant	1611.85	no	NA	NA	NA	0.184863	0.661198	0.877776
ENSRNOG00000018680	18	52.9904	60	60	75.8974	87	87	distant	1137.38	no	NA	NA	NA	0.221707	0.597721	0.840469
ENSRNOG00000030371	18	29.4228	42	54.5772	55.2347	65.1917	78.4846	distant	252.31	yes	-0.65784	0.0541142	0.157153	-0.613933	0.194801	0.518215
ENSRNOG00000002073	19	29.8919	44	58.1081	34.5479	42.808	51.068	distant	166.839	no	NA	NA	NA	-0.554193	0.253815	0.579068
ENSRNOG00000026588	19	2.76951	12	21.2305	3.56679	15.4545	29.4769	distant	623.196	no	NA	NA	NA	-0.137746	0.794687	0.93119
ENSRNOG00000032131	19	15.7917	24	32.2083	23.8202	31.0984	35.9042	local	821.424	no	NA	NA	NA	-0.0191321	0.964136	0.983525
ENSRNOG00000039509	19	3.42967	16	28.5703	4.417	24.3684	33.7742	local	252.78	no	NA	NA	NA	-0.100693	0.849471	0.946142
ENSRNOG00000028176	19	13.9202	28	42.0798	18.8954	33.4403	41.6837	local	168.124	no	NA	NA	NA	-0.304437	0.463469	0.747772
ENSRNOG00000026840	19	6.84981	20	33.1502	8.82173	28.7564	36.4556	distant	216.123	no	NA	NA	NA	-0.114031	0.788038	0.929723
ENSRNOG00000013152	19	22.9739	32	41.0261	30.4976	35.7822	41.0668	local	658.577	no	NA	NA	NA	0.147711	0.751964	0.914172
ENSRNOG00000023459	19	23.6523	36	48.3477	30.8948	38.1241	45.3534	distant	268.451	no	NA	NA	NA	-0.245557	0.595584	0.839609
ENSRNOG00000012622	19	0.0409375	12	23.9591	0.05272	15.4545	31.0744	local	298.182	no	NA	NA	NA	0.0205417	0.969192	0.983525
ENSRNOG00000015150	19	52.2035	64	64	47.6109	55	55	local	311.554	no	NA	NA	NA	0.562325	0.188842	0.511718
ENSRNOG00000025764	19	0	8	21.4638	0	10.303	29.6135	local	198.566	no	NA	NA	NA	0.0978066	0.853758	0.946142
ENSRNOG00000042449	19	0	2	16.0447	0	2.57576	24.4862	distant	169.722	no	NA	NA	NA	-0.646295	0.165535	0.497044
ENSRNOG00000032708	20	0	2	13.2344	11	12.3208	20.8327	local	362.656	no	NA	NA	NA	-0.0645522	0.859379	0.946142
ENSRNOG00000000636	20	2.68627	14	25.3137	12.774	21.6559	32.8378	local	354.965	no	NA	NA	NA	0.0195274	0.960232	0.983525
ENSRNOG00000001168	20	0	4	15.7695	11	13.6415	23.5586	local	313.841	no	NA	NA	NA	-0.0901618	0.804367	0.933011
ENSRNOG00000000443	20	24.0938	38	44	31.7476	44.1745	49	distant	176.195	no	NA	NA	NA	0.349883	0.321645	0.631378
ENSRNOG00000026049	20	31.0834	44	44	37.9937	49	49	local	230.204	no	NA	NA	NA	0.0999255	0.783582	0.927643
ENSRNOG00000000279	20	31.88	44	44	38.7056	49	49	local	285.489	no	NA	NA	NA	-0.283723	0.426949	0.715695
ENSRNOG00000000568	20	16.8127	24	31.1873	24.6803	31.6638	38.0866	local	1083.07	no	NA	NA	NA	0.163389	0.651976	0.868881
ENSRNOG00000001249	20	0	8	20.7523	11	16.283	28.7616	local	240.654	no	NA	NA	NA	0.690388	0.0395278	0.241015
ENSRNOG00000000565	20	19.0186	32	44	27.0522	38.8128	49	local	226.207	no	NA	NA	NA	-0.0619597	0.864982	0.946577
ENSRNOG00000000275	20	0	12	24.953	11	19.5054	32.5154	local	227.952	no	NA	NA	NA	0.0406664	0.917269	0.964008
ENSRNOG00000001449	20	0	6	19.6382	11	14.9623	27.7185	distant	189.43	no	NA	NA	NA	0.174166	0.63036	0.854957
ENSRNOG00000001242	20	0	4	13.4707	11	13.6415	21.0868	local	584.041	no	NA	NA	NA	-0.459516	0.181521	0.507999
ENSRNOG00000043436	20	14.1221	22	29.8779	21.7872	29.8766	36.9164	local	898.15	no	NA	NA	NA	0.136498	0.706911	0.909161
ENSRNOG00000000638	20	4.01851	18	31.9815	13.6537	25.957	38.7962	local	172.649	no	NA	NA	NA	-0.358163	0.309524	0.621811
ENSRNOG00000001239	20	0	6	19.0614	11	14.9623	27.0983	local	221.369	no	NA	NA	NA	-0.401953	0.249547	0.576686
ENSRNOG00000000541	20	0	4	17.109	11	13.6415	24.9989	local	218.543	no	NA	NA	NA	-0.318173	0.370279	0.680326
