# Supplementary material for: Genetic Influences on Brain Gene Expression in Rats Selected for Tameness and Aggression
Source: Oxford University Press journal article supplement (doi:10.1534/genetics.114.168948), 2014-09-03
Supplement: tables5.xlsx [file tables5.xlsx]

## Sheet: eQTL_local_markers.tsv
ensembl_gene_ID	FIA_score_local_marker	chromosome	local_marker_pos_cM	gene_pos_cM	eQTL_overlap_tamenessQTL	genome_wide_significance
ENSRNOG00000015599	128.013	3	72	72.5615	no	no
ENSRNOG00000016217	116.636	17	44	44.273	no	yes
ENSRNOG00000024837	1061.1	16	50	50.0971	no	no
ENSRNOG00000012932	65.691	4	4	4.15353	no	no
ENSRNOG00000001414	41.9175	12	18	17.6001	no	no
ENSRNOG00000038437	102.214	4	54	54.9141	no	no
ENSRNOG00000023991	59.8561	16	58	58.7406	no	no
ENSRNOG00000026901	80.2681	7	4	3.5315	no	no
ENSRNOG00000000451	100.385	20	0	0	no	no
ENSRNOG00000014082	98.6736	7	106	106.632	no	no
ENSRNOG00000015740	95.6328	18	8	7.87909	no	no
ENSRNOG00000021000	44.1766	1	130	129.575	no	no
ENSRNOG00000011754	1005.21	16	56	55.1741	no	yes
ENSRNOG00000033251	49.7569	14	32	31.4585	no	no
ENSRNOG00000006723	2922.9	8	50	49.1147	no	yes
ENSRNOG00000008754	76.1895	6	68	68.9686	no	no
ENSRNOG00000015863	607.322	8	14	13.9066	no	yes
ENSRNOG00000042971	46.4769	14	2	2.4196	no	no
ENSRNOG00000006731	83.4346	3	44	43.4775	yes	no
ENSRNOG00000017528	841.891	5	110	109.037	no	yes
ENSRNOG00000006956	60.9007	5	60	60.1277	no	no
ENSRNOG00000018003	37.1784	2	8	7.03861	no	no
ENSRNOG00000002947	36.638	13	38	38.3816	no	no
ENSRNOG00000027733	140.37	1	52	52.042	yes	no
ENSRNOG00000022136	72.0637	11	38	38.0838	no	no
ENSRNOG00000004075	103.588	10	48	47.8434	no	yes
ENSRNOG00000033090	1060.55	6	12	11.719	no	yes
ENSRNOG00000022983	61.0446	10	42	41.4083	no	no
ENSRNOG00000018752	74.3197	1	128	128.217	no	no
ENSRNOG00000032397	78.3581	19	12	11.4807	no	no
ENSRNOG00000036760	871.588	1	108	108.674	no	yes
ENSRNOG00000019518	40.6383	16	12	12.2754	no	no
ENSRNOG00000020445	48.6267	10	10	9.71226	yes	no
ENSRNOG00000003620	127.521	13	38	37.15	no	no
ENSRNOG00000022398	55.871	1	138	137.368	no	no
ENSRNOG00000014398	72.0217	15	30	29.0129	no	no
ENSRNOG00000036834	650.731	7	106	107.434	no	yes
ENSRNOG00000025757	85.4259	15	20	20.8314	no	no
ENSRNOG00000020578	85.1906	1	56	55.0006	yes	no
ENSRNOG00000027960	1497.75	6	68	67.4312	no	no
ENSRNOG00000010802	85.3755	8	64	64.9969	no	no
ENSRNOG00000002158	494.274	14	4	3.90897	no	yes
ENSRNOG00000022839	49.7298	1	150	150.086	no	no
ENSRNOG00000028771	38.0194	1	116	115.211	no	no
ENSRNOG00000002667	122.051	13	30	30.0391	no	no
ENSRNOG00000009792	43.4076	2	86	86.4585	no	no
ENSRNOG00000039463	1455.33	18	18	17.6853	yes	yes
ENSRNOG00000006921	53.4976	3	98	98.6261	no	no
ENSRNOG00000029957	351.041	1	50	49.6809	yes	yes
ENSRNOG00000010529	149.461	1	48	47.2573	yes	yes
ENSRNOG00000023789	88.0588	2	90	89.464	no	no
ENSRNOG00000018340	64.1002	2	12	11.7177	no	no
ENSRNOG00000016168	161.072	2	104	104.541	no	no
ENSRNOG00000042912	430.91	10	70	69.0276	no	yes
ENSRNOG00000000156	187.719	5	114	113.04	no	yes
ENSRNOG00000008270	40.0739	10	48	48.3292	no	no
ENSRNOG00000012821	137.463	15	36	35.6955	no	no
ENSRNOG00000029637	2231.41	6	68	67.4419	no	yes
ENSRNOG00000023721	100.437	3	94	94.3616	no	no
ENSRNOG00000001770	67.2285	11	54	55.4	no	no
ENSRNOG00000022555	41.3773	10	36	35.9978	yes	no
ENSRNOG00000038540	98.2548	11	50	50.206	no	no
ENSRNOG00000003845	37.7589	10	80	79.6371	yes	no
ENSRNOG00000028670	77.7687	11	18	18.3716	no	no
ENSRNOG00000000471	37.8843	20	0	0	no	no
ENSRNOG00000002549	43.1506	13	2	2.39422	no	no
ENSRNOG00000003367	42.7532	10	46	46.8139	no	no
ENSRNOG00000021966	49.0055	16	2	1.48494	no	no
ENSRNOG00000010549	60	7	90	89.0559	no	no
ENSRNOG00000028064	58.4621	5	102	102.372	no	no
ENSRNOG00000029243	35.1983	7	90	90.0386	no	no
ENSRNOG00000026592	162.552	5	84	84.7479	no	yes
ENSRNOG00000022624	56.5031	5	74	74.998	no	no
ENSRNOG00000018997	687.145	3	98	97.232	no	yes
ENSRNOG00000016022	64.4756	19	16	15.5749	no	no
ENSRNOG00000016838	103.022	5	98	98.9926	no	no
ENSRNOG00000027936	36.5378	1	54	53.7561	yes	no
ENSRNOG00000021474	2320.46	1	64	63.2912	no	yes
ENSRNOG00000004311	47.7588	7	54	53.3645	no	no
ENSRNOG00000015368	609.255	1	110	109.268	no	yes
ENSRNOG00000015554	72.6863	8	50	50.5179	no	no
ENSRNOG00000005830	49.3481	4	72	72.2576	yes	no
ENSRNOG00000033189	194.562	1	54	53.9832	yes	yes
ENSRNOG00000017259	69.2204	14	54	53.1426	no	no
ENSRNOG00000022570	361.45	7	100	100.282	no	yes
ENSRNOG00000001262	44.0235	20	2	2.2616	no	no
ENSRNOG00000011992	63.0985	16	14	14.2993	no	no
ENSRNOG00000008947	41.7387	14	52	51.7857	no	no
ENSRNOG00000025005	63.2998	13	42	42.0029	no	no
ENSRNOG00000028088	95.4226	4	68	67.0942	yes	no
ENSRNOG00000010685	48.5613	8	66	65.983	yes	no
ENSRNOG00000025551	102.559	7	56	55.6952	no	no
ENSRNOG00000043504	38.2024	12	14	14.1634	no	no
ENSRNOG00000030216	185.178	14	4	3.7032	no	yes
ENSRNOG00000016647	60.0654	5	98	98.9044	no	no
ENSRNOG00000026295	80.9923	3	106	105.15	no	no
ENSRNOG00000042726	3717.57	8	66	66.6814	yes	yes
ENSRNOG00000032708	362.656	20	0	0	no	yes
ENSRNOG00000019338	4127.08	1	56	56.0509	yes	yes
ENSRNOG00000022852	119.8	8	50	50.8099	no	no
ENSRNOG00000004295	463.278	10	88	87.6059	yes	yes
ENSRNOG00000037798	50.6162	1	56	55.0294	yes	no
ENSRNOG00000013913	57.2464	19	60	60.7659	no	no
ENSRNOG00000014143	48.9692	2	138	137.306	no	no
ENSRNOG00000010629	65.3613	4	52	52.1086	no	no
ENSRNOG00000019434	125.693	19	42	42.4743	no	no
ENSRNOG00000021412	1006.49	10	60	59.7472	no	yes
ENSRNOG00000014414	343.066	2	68	67.4622	no	yes
ENSRNOG00000042947	203.937	1	100	100.661	no	yes
ENSRNOG00000002664	67.4315	10	2	1.09994	yes	no
ENSRNOG00000021726	90.3237	16	26	26.3645	no	yes
ENSRNOG00000020883	1583.41	1	66	65.0622	no	yes
ENSRNOG00000039904	44.0218	10	4	4.39163	yes	no
ENSRNOG00000007748	145.886	16	36	36.573	no	no
ENSRNOG00000001375	43.3892	12	14	13.1022	no	no
ENSRNOG00000024082	97.0254	8	44	44.6355	no	no
ENSRNOG00000028814	87.8914	12	44	45.3	no	no
ENSRNOG00000025184	35.8529	8	66	65.281	yes	no
ENSRNOG00000005543	40.9994	7	8	8.03759	no	no
ENSRNOG00000005425	1393.66	7	2	2.28717	no	yes
ENSRNOG00000000658	144.227	12	44	45.3	no	no
ENSRNOG00000025676	827.368	8	96	98.0944	yes	yes
ENSRNOG00000032539	53.1059	5	38	38.4775	no	no
ENSRNOG00000011411	283.473	1	6	6.04276	no	yes
ENSRNOG00000008151	51.6594	8	72	71.1814	yes	no
ENSRNOG00000002145	515.288	11	38	38.0538	no	yes
ENSRNOG00000021907	69.6425	7	90	89.7755	no	no
ENSRNOG00000036681	49.2579	10	94	95.3	yes	no
ENSRNOG00000043151	127.657	5	60	59.3018	no	yes
ENSRNOG00000000034	44.6365	13	12	11.4252	no	no
ENSRNOG00000007341	122.186	3	98	98.7325	no	no
ENSRNOG00000030183	53.3118	8	72	71.3465	yes	no
ENSRNOG00000007003	369.897	7	88	87.9554	no	yes
ENSRNOG00000016687	36.2313	1	52	51.5916	yes	no
ENSRNOG00000020666	48.4889	1	130	129.118	no	yes
ENSRNOG00000043385	63.5424	17	32	32.7196	no	no
ENSRNOG00000017413	189.213	2	42	41.4757	no	yes
ENSRNOG00000022155	240.417	4	70	69.3181	yes	yes
ENSRNOG00000009012	43.0551	6	84	84.6647	yes	no
ENSRNOG00000000636	338.011	20	14	13.7604	no	yes
ENSRNOG00000009779	49.8618	7	106	106.345	no	no
ENSRNOG00000013872	136.416	2	80	79.2617	no	yes
ENSRNOG00000011680	62.368	1	90	90.6528	no	no
ENSRNOG00000037853	130.3	2	82	82.4748	no	no
ENSRNOG00000012891	75.6817	9	48	47.6704	no	no
ENSRNOG00000009708	38.3947	5	112	111.183	no	no
ENSRNOG00000012108	117.053	16	50	50.1809	no	no
ENSRNOG00000037710	109.967	5	76	76.9273	no	no
ENSRNOG00000016538	45.86	17	54	54.7096	no	no
ENSRNOG00000001891	65.4002	11	54	55.4	no	no
ENSRNOG00000004968	189.696	6	94	95.6216	yes	yes
ENSRNOG00000031921	38.4279	4	48	48.8958	no	no
ENSRNOG00000023534	81.1245	16	12	11.7768	no	no
ENSRNOG00000011028	250.966	3	88	87.5037	no	no
ENSRNOG00000005659	317.619	10	48	48.1353	no	yes
ENSRNOG00000032131	775.809	19	16	15.9337	no	yes
ENSRNOG00000023985	204.758	1	78	77.611	no	yes
ENSRNOG00000004226	298.636	7	48	47.4076	no	yes
ENSRNOG00000023116	58.3483	6	42	41.0438	no	no
ENSRNOG00000016225	230.343	17	0	0.342131	no	yes
ENSRNOG00000013177	40.3247	2	24	24.3427	no	no
ENSRNOG00000010412	52.7377	5	40	39.8667	no	no
ENSRNOG00000008005	134.696	5	50	49.0886	no	no
ENSRNOG00000038892	371.22	2	54	54.6029	no	yes
ENSRNOG00000032460	51.6676	7	56	55.6506	no	no
ENSRNOG00000039415	387.466	18	18	17.7672	yes	yes
ENSRNOG00000006341	71.5525	15	0	0	no	no
ENSRNOG00000039459	71.1643	18	18	17.7012	yes	no
ENSRNOG00000011357	129.421	10	48	48.5434	no	no
ENSRNOG00000019179	52.7903	3	10	9.59716	no	no
ENSRNOG00000000389	57.4775	20	18	17.3914	no	no
ENSRNOG00000006627	39.4369	6	30	29.6033	no	no
ENSRNOG00000006611	42.6356	3	44	43.4423	yes	no
ENSRNOG00000027880	423.599	8	90	89.0348	yes	yes
ENSRNOG00000026110	66.5595	20	40	40.958	no	no
ENSRNOG00000000913	59.2212	12	28	27.5441	no	no
ENSRNOG00000033215	47.7397	20	0	0	no	no
ENSRNOG00000013346	36.6072	16	2	1.33374	no	no
ENSRNOG00000012811	267.135	3	68	68.7056	no	yes
ENSRNOG00000017669	152.458	2	96	95.3028	no	no
ENSRNOG00000025065	51.9424	5	86	85.7373	no	no
ENSRNOG00000004448	42.1178	7	30	30.5147	no	no
ENSRNOG00000004666	164.28	3	62	61.1633	no	yes
ENSRNOG00000020743	137.235	1	56	55.1064	yes	no
ENSRNOG00000021702	48.6549	5	4	3.78131	no	no
ENSRNOG00000018681	230.273	2	92	91.1706	no	yes
ENSRNOG00000042285	143.086	1	50	49.6897	yes	no
ENSRNOG00000024597	75.4554	16	6	6.13566	no	no
ENSRNOG00000006082	140.693	6	8	7.5	no	yes
ENSRNOG00000015980	42.4419	17	54	54.2546	no	no
ENSRNOG00000005082	163.419	13	52	53.7	no	no
ENSRNOG00000015949	804.737	8	54	53.5521	no	yes
ENSRNOG00000007079	129.635	4	30	30.8719	no	yes
ENSRNOG00000004476	134.144	7	48	48.3486	no	no
ENSRNOG00000003244	49.1908	10	36	35.2476	yes	no
ENSRNOG00000004837	133.999	8	96	98.9	yes	no
ENSRNOG00000023299	47.1776	14	2	1.76741	no	no
ENSRNOG00000013521	194.012	2	6	5.71574	no	yes
ENSRNOG00000000614	102.874	20	10	10.9558	no	no
ENSRNOG00000042224	179.833	5	68	67.3784	no	yes
ENSRNOG00000010027	94.2928	8	76	75.7669	yes	no
ENSRNOG00000030016	597.576	8	32	31.7012	no	yes
ENSRNOG00000022076	87.4704	10	36	36.2081	yes	no
ENSRNOG00000042496	107.659	7	2	2.28231	no	no
ENSRNOG00000021555	192.717	11	18	18.1436	no	yes
ENSRNOG00000011409	174.657	1	10	9.97189	no	yes
ENSRNOG00000000436	105.151	20	0	0	no	no
ENSRNOG00000016888	38.3555	9	72	72.4682	no	no
ENSRNOG00000013767	171.968	1	54	54.0005	yes	yes
ENSRNOG00000025494	48.8343	14	30	30.7615	no	no
ENSRNOG00000013123	175.151	1	104	103.05	no	yes
ENSRNOG00000023679	84.2401	4	56	56.4326	no	no
ENSRNOG00000030352	142.609	18	18	17.7053	yes	yes
ENSRNOG00000006388	1531.22	6	58	57.3559	no	yes
ENSRNOG00000007799	665.33	5	76	75.0239	no	yes
ENSRNOG00000033617	632.369	10	74	73.9837	no	yes
ENSRNOG00000015440	45.7049	16	38	37.0142	no	no
ENSRNOG00000023908	153.482	2	64	63.7651	no	no
ENSRNOG00000020948	54.3347	8	90	89.0989	yes	no
ENSRNOG00000015851	58.2137	4	66	66.1067	yes	no
ENSRNOG00000037206	62.2557	4	90	90.2282	yes	no
ENSRNOG00000019141	73.0294	1	150	149.996	no	no
ENSRNOG00000011964	170.912	6	68	67.8976	no	yes
ENSRNOG00000001090	236.564	12	0	0	no	yes
ENSRNOG00000015695	127.371	19	62	61.716	no	no
ENSRNOG00000039509	234.033	19	16	16.1113	no	yes
ENSRNOG00000006888	50.9363	4	64	64.3073	yes	no
ENSRNOG00000011284	102.243	2	124	124.863	no	no
ENSRNOG00000001229	44.5212	20	2	1.44043	no	no
ENSRNOG00000021268	45.0796	3	76	76.0644	no	no
ENSRNOG00000031643	63.8124	1	102	101.264	no	no
ENSRNOG00000017887	117.65	5	80	79.9931	no	no
ENSRNOG00000029678	37.9457	10	36	35.8154	yes	no
ENSRNOG00000041468	63.5477	6	90	90.5835	yes	no
ENSRNOG00000044439	174.005	5	40	40.0028	no	yes
ENSRNOG00000037348	82.2642	1	64	63.2281	no	no
ENSRNOG00000025981	205.006	10	62	62.9515	no	yes
ENSRNOG00000005153	45.5173	6	94	94.0472	yes	no
ENSRNOG00000032218	36.7626	14	32	31.0112	no	no
ENSRNOG00000017899	49.1446	5	100	99.5307	no	no
ENSRNOG00000015896	71.7443	8	50	50.5945	no	no
ENSRNOG00000028041	404.738	1	52	51.6844	yes	yes
ENSRNOG00000039790	227.722	9	8	7.23127	no	yes
ENSRNOG00000008291	1007.35	6	6	6.66588	no	yes
ENSRNOG00000008417	196.97	7	2	2.00184	no	yes
ENSRNOG00000010183	552.182	2	88	88.2754	no	yes
ENSRNOG00000018822	210.524	16	12	12.1762	no	yes
ENSRNOG00000003831	674.919	6	82	81.5189	yes	yes
ENSRNOG00000008771	130.555	8	40	39.1388	no	no
ENSRNOG00000000040	304.287	13	32	31.5843	no	yes
ENSRNOG00000006595	73.7813	8	42	41.8528	no	no
ENSRNOG00000022597	50.758	15	22	22.4781	no	no
ENSRNOG00000014197	97.251	5	102	102.486	no	no
ENSRNOG00000033091	309.562	3	54	53.2378	no	yes
ENSRNOG00000030153	36.8142	20	0	0	no	no
ENSRNOG00000030729	37.5189	20	0	0	no	no
ENSRNOG00000020072	90.4489	18	18	17.5792	yes	no
ENSRNOG00000022957	70.5367	18	26	26.9102	yes	no
ENSRNOG00000015609	45.4432	1	48	47.4137	yes	no
ENSRNOG00000023296	38.7452	1	58	57.5624	yes	no
ENSRNOG00000017787	132.49	17	18	17.4344	no	no
ENSRNOG00000002095	39.1318	14	6	5.05698	no	no
ENSRNOG00000017286	857.936	15	30	29.2784	no	yes
ENSRNOG00000007398	63.5691	5	82	81.8935	no	no
ENSRNOG00000029815	47.9144	16	12	11.7265	no	no
ENSRNOG00000039461	105.713	18	18	17.6884	yes	no
ENSRNOG00000001357	41.7294	12	12	12.7874	no	no
ENSRNOG00000017901	82.9257	1	128	128.064	no	no
ENSRNOG00000040135	121.108	10	0	0	no	no
ENSRNOG00000043270	61.7319	8	6	5.42118	no	no
ENSRNOG00000007415	356.426	3	10	10.3463	no	yes
ENSRNOG00000008133	52.8158	7	84	84.2778	no	no
ENSRNOG00000006885	48.4861	7	102	101.443	no	no
ENSRNOG00000003931	47.2412	10	86	86.6531	yes	no
ENSRNOG00000029651	49.2279	7	54	53.3764	no	no
ENSRNOG00000017067	1091.2	18	52	52.2701	no	yes
ENSRNOG00000016164	512.586	2	90	90.9139	no	yes
ENSRNOG00000010636	44.0935	5	76	76.1259	no	no
ENSRNOG00000019403	146.913	18	32	32.5847	yes	no
ENSRNOG00000018616	538.003	1	52	52.0102	yes	yes
ENSRNOG00000042246	67.3422	5	38	37.0402	no	no
ENSRNOG00000032830	52.7668	11	20	20.1925	no	no
ENSRNOG00000012956	65.2686	3	100	99.5469	no	no
ENSRNOG00000025115	74.9959	8	44	44.1438	no	no
ENSRNOG00000014172	55.3456	16	16	15.6632	no	no
ENSRNOG00000013040	144.114	3	4	3.83871	no	no
ENSRNOG00000012166	159.355	3	70	69.5763	no	no
ENSRNOG00000003572	76.3658	10	36	35.6743	yes	no
ENSRNOG00000013229	88.0681	8	66	66.7997	yes	no
ENSRNOG00000019031	68.7196	9	72	72.9303	no	no
ENSRNOG00000013702	391.291	1	102	103	no	yes
ENSRNOG00000015516	78.7694	1	142	142.296	no	no
ENSRNOG00000014232	415.761	2	80	80.1546	no	yes
ENSRNOG00000020634	90.1855	1	64	64.8074	no	no
ENSRNOG00000010705	77.5935	1	6	5.12695	no	no
ENSRNOG00000018204	242.617	3	70	70.1444	no	yes
ENSRNOG00000030388	1108.58	18	18	17.5938	yes	yes
ENSRNOG00000012447	96.3736	19	8	7.61373	no	no
ENSRNOG00000027444	40.8672	6	50	49.4346	no	no
ENSRNOG00000002381	99.9578	14	8	7.79561	no	no
ENSRNOG00000017734	79.2845	3	56	56.9301	no	no
ENSRNOG00000042691	51.5557	10	94	94.7798	yes	no
ENSRNOG00000028586	51.9392	16	52	51.7582	no	no
ENSRNOG00000029773	607.199	8	44	44.2066	no	yes
ENSRNOG00000001347	64.4375	12	38	37.5048	no	no
ENSRNOG00000015406	72.8962	1	142	142.181	no	no
ENSRNOG00000006508	41.5195	4	60	59.784	yes	no
ENSRNOG00000032315	204.923	7	2	1.44152	no	yes
ENSRNOG00000031454	52.6371	17	44	44.4811	no	no
ENSRNOG00000003018	448.559	13	42	42.5401	no	yes
ENSRNOG00000031197	292.399	18	0	0	no	yes
ENSRNOG00000025030	72.5275	5	112	112.748	no	no
ENSRNOG00000007454	162.475	10	48	48.1963	no	yes
ENSRNOG00000013690	69.2851	6	94	93.8315	yes	no
ENSRNOG00000037240	48.7714	7	82	82.5281	no	no
ENSRNOG00000030530	41.9401	7	2	1.95894	no	no
ENSRNOG00000028207	40.6516	13	30	29.473	no	no
ENSRNOG00000007189	1184.6	5	74	74.9508	no	yes
ENSRNOG00000027463	301.936	14	14	13.272	no	yes
ENSRNOG00000039511	47.6619	19	16	16.1014	no	no
ENSRNOG00000033729	315.111	1	64	63.4915	no	yes
ENSRNOG00000003033	90.6979	10	78	78.8061	yes	no
ENSRNOG00000009917	36.807	4	64	64.7598	yes	no
ENSRNOG00000004004	302.229	6	82	81.7739	yes	yes
ENSRNOG00000017129	387.856	9	56	56.8463	no	yes
ENSRNOG00000021686	83.6815	17	42	41.6884	no	no
ENSRNOG00000006336	76.5234	8	96	98.9	yes	no
ENSRNOG00000022337	59.6159	15	64	64.9571	yes	no
ENSRNOG00000021795	90.9795	7	84	84.9928	no	no
ENSRNOG00000026336	49.3934	16	56	56.7761	no	no
ENSRNOG00000003218	98.7739	10	44	43.7674	no	no
ENSRNOG00000002881	87.433	13	42	42.0533	no	no
ENSRNOG00000042428	92.378	13	34	33.2821	no	no
ENSRNOG00000039024	40.6876	11	40	39.1172	no	no
ENSRNOG00000015354	1330.28	9	44	43.2032	no	yes
ENSRNOG00000007899	70.2401	4	18	18.0833	no	no
ENSRNOG00000026229	38.5691	15	70	71.8767	yes	no
ENSRNOG00000029076	286.703	10	0	0	no	yes
ENSRNOG00000015794	220.527	3	100	100.114	no	yes
ENSRNOG00000033747	121.643	9	66	66.4688	no	no
ENSRNOG00000007139	52.9938	5	20	20.3596	no	no
ENSRNOG00000008765	97.3413	2	58	58.7326	no	no
ENSRNOG00000012311	71.7064	1	12	11.1939	no	no
ENSRNOG00000011647	95.4409	2	92	92.1203	no	no
ENSRNOG00000030712	92.4555	20	0	0	no	no
ENSRNOG00000016636	277.89	3	102	101.971	no	yes
ENSRNOG00000014243	50.4658	2	92	91.0913	no	no
ENSRNOG00000033402	2161.89	9	14	14.2941	no	yes
ENSRNOG00000020062	53.1081	18	18	17.6028	yes	no
ENSRNOG00000013476	378.958	2	128	128.525	no	yes
ENSRNOG00000038025	81.073	17	54	54.3438	no	no
ENSRNOG00000016503	53.9501	9	56	55.0989	no	no
ENSRNOG00000043245	507.232	1	48	47.4771	yes	yes
ENSRNOG00000039454	108.929	18	18	17.7091	yes	no
ENSRNOG00000006699	353.305	6	68	68.4485	no	yes
ENSRNOG00000033809	40.9224	8	90	89.4772	yes	no
ENSRNOG00000024631	48.0617	7	88	87.5286	no	no
ENSRNOG00000017718	112.107	18	18	17.3919	yes	no
ENSRNOG00000018379	35.9483	1	116	115.088	no	no
ENSRNOG00000012414	385.743	2	0	0	no	yes
ENSRNOG00000004603	37.375	7	50	49.081	no	no
ENSRNOG00000019519	82.5373	17	0	0	no	no
ENSRNOG00000008138	839.771	8	36	36.2259	no	yes
ENSRNOG00000019907	72.694	9	8	7.14152	no	no
ENSRNOG00000006711	38.4245	4	48	48.4792	no	no
ENSRNOG00000000903	43.3165	12	28	27.4793	no	no
ENSRNOG00000025141	225.288	3	88	88.2243	no	yes
ENSRNOG00000034157	66.1559	7	2	2.38911	no	no
ENSRNOG00000012175	158.935	3	108	108.796	no	no
ENSRNOG00000013555	39.8076	2	26	25.0081	no	no
ENSRNOG00000006519	92.4493	10	48	48.1515	no	yes
ENSRNOG00000001168	299.959	20	0	0	no	yes
ENSRNOG00000016608	279.086	1	52	51.5797	yes	yes
ENSRNOG00000025067	44.0897	3	108	108.523	no	no
ENSRNOG00000001807	402.315	4	104	106.7	no	yes
ENSRNOG00000001349	2218.74	12	12	12.7496	no	yes
ENSRNOG00000015011	87.2148	1	142	141.638	no	no
ENSRNOG00000027017	856.553	13	30	30.533	no	yes
ENSRNOG00000042843	44.0141	10	42	41.3268	no	no
ENSRNOG00000027253	135.709	18	18	17.7079	yes	no
ENSRNOG00000023008	210.289	5	102	101.76	no	yes
ENSRNOG00000006916	110.411	3	2	2.29511	no	no
ENSRNOG00000043192	50.1496	17	56	55.9521	no	no
ENSRNOG00000025245	59.2146	1	128	127.847	no	no
ENSRNOG00000031233	246.667	7	94	94.7814	no	yes
ENSRNOG00000014168	39.0632	8	96	96.0516	yes	no
ENSRNOG00000038480	52.8405	6	60	59.9242	no	no
ENSRNOG00000000443	105.838	20	0	0	no	no
ENSRNOG00000040266	246.725	6	8	7.13506	no	yes
ENSRNOG00000013867	91.5178	18	18	18.0033	yes	no
ENSRNOG00000020199	45.1266	5	114	115.059	no	no
ENSRNOG00000017704	101.062	8	88	87.542	yes	no
ENSRNOG00000008678	69.3685	4	66	66.8014	yes	no
ENSRNOG00000032552	300.151	7	2	2.35956	no	yes
ENSRNOG00000011312	89.1628	1	50	49.5038	yes	no
ENSRNOG00000003100	36.416	13	42	42.714	no	no
ENSRNOG00000023587	110.426	17	52	52.4497	no	no
ENSRNOG00000002538	148.127	13	2	1.77389	no	yes
ENSRNOG00000002137	166.956	14	24	23.7297	no	yes
ENSRNOG00000014642	3357.06	5	114	113.965	no	yes
ENSRNOG00000001966	88.436	11	40	40.0987	no	no
ENSRNOG00000018576	77.0061	5	96	95.4115	no	no
ENSRNOG00000001701	66.5561	11	20	20.2659	no	no
ENSRNOG00000011675	2370.92	1	50	50.0901	yes	yes
ENSRNOG00000017810	1030.12	1	120	119.336	no	yes
ENSRNOG00000006995	50.3627	7	102	101.792	no	no
ENSRNOG00000016434	41.5218	1	54	53.7229	yes	no
ENSRNOG00000016367	41.0161	1	54	54.1517	yes	no
ENSRNOG00000004840	58.4815	7	42	42.7573	no	no
ENSRNOG00000021872	73.5965	10	8	7.30181	yes	no
ENSRNOG00000007455	93.3365	10	60	59.3	no	no
ENSRNOG00000007837	290.083	5	76	75.0448	no	yes
ENSRNOG00000015283	60.8333	5	84	84.2393	no	no
ENSRNOG00000015807	95.7232	1	158	157.473	no	no
ENSRNOG00000006999	80.2264	5	72	72.4192	no	no
ENSRNOG00000031801	338.734	11	54	55.4	no	yes
ENSRNOG00000029416	63.232	7	2	2.40257	no	no
ENSRNOG00000011386	53.2966	1	10	9.8584	no	no
ENSRNOG00000009506	55.1073	8	6	6.11574	no	no
ENSRNOG00000043279	174.955	6	58	57.734	no	no
ENSRNOG00000008892	35.1402	15	16	16.6446	no	no
ENSRNOG00000008336	123.761	7	66	65.2128	no	no
ENSRNOG00000022796	61.1464	1	152	152.103	no	no
ENSRNOG00000009117	86.7274	6	84	84.7201	yes	no
ENSRNOG00000009412	43.4251	15	32	31.2467	no	no
ENSRNOG00000016281	235.377	16	58	58.962	no	yes
ENSRNOG00000018358	105.384	16	4	4.19503	no	no
ENSRNOG00000018081	54.5557	8	52	51.2652	no	no
ENSRNOG00000033271	35.3443	5	44	44.692	no	no
ENSRNOG00000007765	704.28	3	52	51.7468	yes	yes
ENSRNOG00000015958	60.461	9	64	64.5293	no	no
ENSRNOG00000019986	83.8069	4	36	36.2307	no	no
ENSRNOG00000003759	133.525	6	80	79.9477	yes	no
ENSRNOG00000008011	37.6962	5	78	78.1768	no	no
ENSRNOG00000003349	1761.84	10	36	36.1079	yes	yes
ENSRNOG00000010081	125.089	2	88	88.2256	no	no
ENSRNOG00000011497	85.1034	5	40	39.7883	no	no
ENSRNOG00000015076	174.754	4	66	65.3948	yes	yes
ENSRNOG00000017820	43.7101	17	18	17.5093	no	no
ENSRNOG00000006726	129.914	4	88	88.859	yes	no
ENSRNOG00000033740	51.2745	5	58	57.1426	no	no
ENSRNOG00000017020	366.41	9	68	68.8295	no	yes
ENSRNOG00000033583	80.9699	7	2	1.38682	no	no
ENSRNOG00000028063	90.2768	5	46	45.1762	no	no
ENSRNOG00000011913	57.1927	2	60	60.8484	no	no
ENSRNOG00000002775	322.673	13	30	30.3183	no	yes
ENSRNOG00000016948	39.3776	1	162	164.3	no	no
ENSRNOG00000026049	230.204	20	42	42.0637	no	yes
ENSRNOG00000043449	49.7564	16	60	61.9	no	no
ENSRNOG00000031154	166.399	10	10	9.83704	yes	yes
ENSRNOG00000012739	246.697	16	44	44.9244	no	yes
ENSRNOG00000002826	266.008	13	42	42.0249	no	yes
ENSRNOG00000015768	67.0334	4	66	66.0593	yes	no
ENSRNOG00000011071	64.2038	8	66	66.4232	yes	no
ENSRNOG00000015787	256.769	10	76	75.3201	yes	yes
ENSRNOG00000010319	702.224	15	32	31.3566	no	yes
ENSRNOG00000010999	55.2999	8	6	6.44934	no	no
ENSRNOG00000001296	66.7083	12	36	36.2374	no	no
ENSRNOG00000017439	822.833	8	54	53.9347	no	yes
ENSRNOG00000030318	96.7888	8	6	6.14345	no	no
ENSRNOG00000020623	1411.32	1	64	64.7994	no	yes
ENSRNOG00000013446	513.844	9	44	43.5034	no	yes
ENSRNOG00000021793	183.74	8	38	38.1602	no	yes
ENSRNOG00000003736	107.547	9	34	33.4739	no	no
ENSRNOG00000019012	66.8713	9	72	72.8647	no	no
ENSRNOG00000009945	55.9031	8	76	75.6032	yes	no
ENSRNOG00000014818	139.929	17	0	0	no	no
ENSRNOG00000006146	43.6819	6	16	15.7823	no	no
ENSRNOG00000015615	81.1987	13	0	0.971501	no	no
ENSRNOG00000017593	50.1539	17	42	41.8272	no	no
ENSRNOG00000026874	64.5244	4	48	48.4959	no	no
ENSRNOG00000039455	350.147	18	18	17.7067	yes	yes
ENSRNOG00000021693	181.38	16	26	26.4135	no	yes
ENSRNOG00000021095	195.876	1	58	57.1923	yes	yes
ENSRNOG00000006144	484.165	4	76	75.9533	yes	yes
ENSRNOG00000019825	55.6449	1	128	128.668	no	no
ENSRNOG00000016622	161.401	2	10	9.27637	no	yes
ENSRNOG00000012899	138.401	18	2	1.68656	no	no
ENSRNOG00000001890	611.073	11	54	55.4	no	yes
ENSRNOG00000014970	109.504	5	98	98.3968	no	no
ENSRNOG00000010196	52.3605	8	92	91.7761	yes	no
ENSRNOG00000009358	83.7686	5	18	17.0693	no	no
ENSRNOG00000017321	39.6962	1	162	164.3	no	no
ENSRNOG00000017577	229.645	17	18	17.3936	no	no
ENSRNOG00000008855	691	15	22	22.9064	no	yes
ENSRNOG00000029212	37.4501	2	4	4.48473	no	no
ENSRNOG00000029893	40.3342	2	114	113.178	no	no
ENSRNOG00000002272	41.7522	14	26	25.7495	no	no
ENSRNOG00000001603	49.2371	11	16	15.7747	no	no
ENSRNOG00000000279	285.489	20	42	42.0998	no	yes
ENSRNOG00000007606	551.455	10	64	63.4108	no	yes
ENSRNOG00000025423	99.5526	11	54	55.4	no	no
ENSRNOG00000038365	579.561	16	48	47.1132	no	no
ENSRNOG00000030397	117.486	6	60	59.9114	no	no
ENSRNOG00000033341	85.1468	9	2	2.94155	no	no
ENSRNOG00000043513	2842.62	5	80	79.2626	no	yes
ENSRNOG00000001699	37.8766	11	20	20.1718	no	no
ENSRNOG00000013636	45.3031	9	44	43.4893	no	no
ENSRNOG00000017646	54.3456	19	58	57.9516	no	no
ENSRNOG00000029320	427.415	4	18	17.8121	no	yes
ENSRNOG00000007405	44.5924	4	48	48.7064	no	no
ENSRNOG00000009181	37.4221	15	26	26.5408	no	no
ENSRNOG00000028176	142.383	19	16	16.8156	no	yes
ENSRNOG00000012363	58.772	15	14	14.9752	no	no
ENSRNOG00000034126	933.434	18	18	17.687	yes	yes
ENSRNOG00000005289	118.871	6	8	7.5	no	no
ENSRNOG00000018052	44.1301	1	36	36.2933	no	no
ENSRNOG00000009660	495.185	16	26	25.2141	no	yes
ENSRNOG00000028523	39.93	12	36	36.7383	no	no
ENSRNOG00000005097	158.151	10	36	36.4863	yes	yes
ENSRNOG00000011258	85.969	5	108	107.439	no	no
ENSRNOG00000002203	49.6461	14	6	6.6282	no	no
ENSRNOG00000028941	43.7758	2	6	6.95758	no	no
ENSRNOG00000002207	132.261	14	30	29.1152	no	no
ENSRNOG00000023972	156.226	16	58	58.7838	no	yes
ENSRNOG00000021442	187.828	1	24	24.3911	no	yes
ENSRNOG00000043007	117.455	1	64	64.7485	no	no
ENSRNOG00000033887	501.05	6	68	67.3843	no	yes
ENSRNOG00000011153	57.082	4	90	90.3226	yes	no
ENSRNOG00000004716	70.268	6	56	56.9642	no	no
ENSRNOG00000018461	77.3102	18	32	31.6956	yes	no
ENSRNOG00000024445	398.734	10	6	6.45807	yes	yes
ENSRNOG00000011032	157.094	2	6	6.43683	no	yes
ENSRNOG00000011139	98.2254	6	62	61.9779	no	no
ENSRNOG00000019163	54.1074	2	98	98.379	no	no
ENSRNOG00000034318	60.475	3	100	99.7594	no	no
ENSRNOG00000015140	44.4679	2	108	107.982	no	no
ENSRNOG00000015962	3992.35	5	108	108.349	no	yes
ENSRNOG00000021776	133.09	14	16	16.045	no	no
ENSRNOG00000006779	109.45	4	14	14.2216	no	yes
ENSRNOG00000009360	65.8342	7	84	84.4208	no	no
ENSRNOG00000021155	287.671	2	94	94.6304	no	yes
ENSRNOG00000001816	133.238	11	54	54.7658	no	no
ENSRNOG00000029264	36.7207	16	12	12.2065	no	no
ENSRNOG00000015318	237.036	5	84	84.2698	no	yes
ENSRNOG00000026861	757.062	1	52	52.8703	yes	no
ENSRNOG00000043037	46.8108	3	66	66.4223	no	no
ENSRNOG00000026840	675.665	5	112	111.131	no	yes
ENSRNOG00000011652	41.5854	3	72	72.1795	no	no
ENSRNOG00000011928	50.1636	4	42	42.104	no	no
ENSRNOG00000015274	44.7203	2	100	99.4141	no	no
ENSRNOG00000006028	56.1918	7	94	94.7592	no	no
ENSRNOG00000010301	74.4944	4	74	73.8694	yes	no
ENSRNOG00000024291	879.349	8	54	54.5763	no	yes
ENSRNOG00000039854	297.873	4	18	17.8338	no	yes
ENSRNOG00000016733	138.552	2	92	91.9756	no	yes
ENSRNOG00000012007	119.499	19	8	7.51066	no	no
ENSRNOG00000026447	470.051	5	108	107.075	no	yes
ENSRNOG00000009372	160.483	2	128	127.986	no	yes
ENSRNOG00000021062	47.6021	1	58	57.1648	yes	no
ENSRNOG00000004483	90.0204	7	42	42.5167	no	no
ENSRNOG00000039234	43.1725	12	12	12.6899	no	no
ENSRNOG00000042114	42.6054	16	56	56.1924	no	no
ENSRNOG00000004542	45.7035	6	80	80.6302	yes	no
ENSRNOG00000016070	125.896	2	68	67.6688	no	no
ENSRNOG00000004516	212.467	15	70	71.9	yes	yes
ENSRNOG00000011263	749.669	16	0	0.961981	no	yes
ENSRNOG00000011170	41.2853	7	84	84.6628	no	no
ENSRNOG00000014354	305.171	10	84	83.4848	yes	yes
ENSRNOG00000028699	166.626	10	46	46.8311	no	yes
ENSRNOG00000014863	531.243	5	38	38.6247	no	yes
ENSRNOG00000042932	850.624	6	12	12.0488	no	yes
ENSRNOG00000003397	350.009	10	46	46.823	no	yes
ENSRNOG00000015568	74.9739	16	46	46.4182	no	no
ENSRNOG00000010477	149.304	3	6	6.86567	no	no
ENSRNOG00000004789	57.9944	13	52	53.7	no	no
ENSRNOG00000019221	737.265	2	100	100.733	no	yes
ENSRNOG00000003794	42.8177	10	6	5.77033	yes	no
ENSRNOG00000029789	62.8017	1	128	128.051	no	no
ENSRNOG00000027179	58.6463	11	40	39.4813	no	no
ENSRNOG00000014075	47.6418	15	70	71.9	yes	no
ENSRNOG00000008101	37.7047	6	84	84.1156	yes	no
ENSRNOG00000000398	42.6728	20	22	22.2625	no	no
ENSRNOG00000025970	371.391	9	60	60.264	no	yes
ENSRNOG00000013323	36.914	1	24	24.0563	no	no
ENSRNOG00000019826	438.46	18	16	16.9848	yes	yes
ENSRNOG00000013770	387.677	1	92	92.0014	no	yes
ENSRNOG00000027914	45.6745	10	48	48.7018	no	no
ENSRNOG00000017508	212.419	1	52	51.6333	yes	yes
ENSRNOG00000011861	37.9109	16	20	19.7916	no	no
ENSRNOG00000004537	117.066	13	40	40.22	no	no
ENSRNOG00000007291	42.4631	5	0	0.755818	no	no
ENSRNOG00000003104	43.7904	10	44	43.652	no	no
ENSRNOG00000034026	78.9405	6	14	13.4934	no	no
ENSRNOG00000014589	128.467	1	88	88.753	no	no
ENSRNOG00000023549	98.6068	1	2	1.24347	no	no
ENSRNOG00000002296	58.6024	14	28	27.5396	no	no
ENSRNOG00000016266	103.021	1	78	77.6223	no	no
ENSRNOG00000012698	388.418	1	78	78.851	no	yes
ENSRNOG00000025991	44.9162	4	18	18.3272	no	no
ENSRNOG00000004735	63.5686	3	90	89.8223	no	no
ENSRNOG00000005823	50.7899	7	8	8.20519	no	no
ENSRNOG00000032058	1855.67	13	40	39.3962	no	no
ENSRNOG00000013152	648.402	19	26	26.2093	no	yes
ENSRNOG00000008534	105.726	3	94	94.8172	no	no
ENSRNOG00000033206	404.358	6	68	67.708	no	yes
ENSRNOG00000010282	44.1843	4	90	90.0947	yes	no
ENSRNOG00000015928	48.3781	3	100	100.154	no	no
ENSRNOG00000003310	104.972	13	50	49.8753	no	no
ENSRNOG00000007041	123.14	4	54	53.5755	no	yes
ENSRNOG00000026458	339.717	11	54	55.041	no	yes
ENSRNOG00000040297	174.507	2	0	0	no	yes
ENSRNOG00000005783	220.868	15	0	0	no	yes
ENSRNOG00000009388	429.564	2	84	83.7878	no	yes
ENSRNOG00000002839	107.301	13	38	38.0251	no	no
ENSRNOG00000015077	81.2068	19	62	61.1879	no	no
ENSRNOG00000012762	61.5093	3	110	109.064	no	no
ENSRNOG00000030629	59.2672	6	2	2.79135	no	no
ENSRNOG00000008577	58.8085	10	94	95.3	yes	no
ENSRNOG00000005350	1290.52	7	4	3.80656	no	yes
ENSRNOG00000024065	146.652	1	54	54.6471	yes	no
ENSRNOG00000001960	960.494	14	14	14.7728	no	yes
ENSRNOG00000030017	49.0772	16	6	5.15026	no	no
ENSRNOG00000015713	66.9424	1	104	104.402	no	no
ENSRNOG00000015187	79.6633	3	106	105.493	no	no
ENSRNOG00000016545	542.537	10	8	8.52592	yes	yes
ENSRNOG00000023540	389.203	8	56	55.1181	no	no
ENSRNOG00000009967	383.541	6	16	16.3683	no	yes
ENSRNOG00000007486	45.7468	4	86	86.1362	yes	no
ENSRNOG00000020357	37.6014	2	92	91.4782	no	no
ENSRNOG00000012772	88.5997	19	34	34.5217	no	no
ENSRNOG00000013965	179.319	1	154	153.595	no	yes
ENSRNOG00000029184	73.1543	11	24	24.9434	no	no
ENSRNOG00000005106	738.241	14	44	44.0359	no	yes
ENSRNOG00000030983	35.6217	11	22	22.0433	no	no
ENSRNOG00000000014	1135.41	3	98	98.326	no	yes
ENSRNOG00000016042	82.1364	8	54	53.6237	no	no
ENSRNOG00000016774	378.553	10	8	8.5671	yes	yes
ENSRNOG00000018400	58.0379	17	0	0	no	no
ENSRNOG00000002680	44.3982	13	30	30.1349	no	no
ENSRNOG00000013603	132.404	5	108	107.958	no	no
ENSRNOG00000018141	205.938	17	26	26.1416	no	yes
ENSRNOG00000009968	44.188	2	20	20.0526	no	no
ENSRNOG00000004910	83.4919	13	10	10.3391	no	no
ENSRNOG00000024953	778.617	5	12	12.9545	no	yes
ENSRNOG00000029871	358.32	6	64	64.7567	no	yes
ENSRNOG00000033560	370.945	2	96	95.0049	no	yes
ENSRNOG00000001888	130.973	11	54	55.4	no	no
ENSRNOG00000001353	239.373	12	12	12.7594	no	yes
ENSRNOG00000013434	341.342	2	78	77.1809	no	yes
ENSRNOG00000022176	45.3548	14	72	74	no	no
ENSRNOG00000010911	59.4137	8	84	84.1882	yes	no
ENSRNOG00000027513	2115.55	3	116	117.957	no	yes
ENSRNOG00000000432	86.1558	20	0	0	no	no
ENSRNOG00000006060	145.394	7	54	54.7862	no	no
ENSRNOG00000015631	82.1831	17	0	0.179189	no	no
ENSRNOG00000003120	58.2798	13	14	13.0564	no	no
ENSRNOG00000004328	56.5727	7	66	65.8922	no	no
ENSRNOG00000001823	51.3789	11	54	54.6467	no	no
ENSRNOG00000012705	58.1059	10	72	71.997	no	no
ENSRNOG00000005059	114.686	3	2	1.98565	no	no
ENSRNOG00000022561	57.13	5	96	96.2721	no	no
ENSRNOG00000001035	80.0511	12	34	33.9278	no	no
ENSRNOG00000013438	277.496	17	32	31.711	no	yes
ENSRNOG00000004670	1649.79	14	56	56.193	no	yes
ENSRNOG00000023459	302.395	5	80	79.6772	no	yes
ENSRNOG00000001251	158.681	12	8	8.4161	no	yes
ENSRNOG00000013411	54.4426	2	40	40.8399	no	no
ENSRNOG00000027355	71.2106	18	16	16.0504	yes	no
ENSRNOG00000030750	115.856	10	36	35.8013	yes	yes
ENSRNOG00000017872	676.559	1	128	128.022	no	yes
ENSRNOG00000032748	69.9129	10	0	0	no	no
ENSRNOG00000010971	47.3839	2	26	26.5891	no	no
ENSRNOG00000015848	140.538	4	104	106.638	no	no
ENSRNOG00000019982	67.1038	1	54	54.6533	yes	no
ENSRNOG00000015021	50.1539	16	58	58.7047	no	no
ENSRNOG00000026979	45.0622	8	12	12.5758	no	no
ENSRNOG00000000568	1070.49	20	20	19.9684	no	yes
ENSRNOG00000023130	561.726	13	52	53.7	no	yes
ENSRNOG00000007001	466.858	6	68	68.5075	no	yes
ENSRNOG00000010332	92.0302	5	44	44.6791	no	no
ENSRNOG00000025130	162.361	3	68	68.9079	no	yes
ENSRNOG00000006623	180.273	3	36	36.7019	yes	yes
ENSRNOG00000004458	47.5338	6	74	73.7177	yes	no
ENSRNOG00000001963	306.31	11	22	22.6701	no	no
ENSRNOG00000009278	269.393	15	24	23.1498	no	yes
ENSRNOG00000040166	108.436	2	6	5.69625	no	no
ENSRNOG00000024549	42.84	7	2	1.84673	no	no
ENSRNOG00000014766	251.736	5	38	37.9122	no	yes
ENSRNOG00000002899	50.3346	10	44	43.1951	no	no
ENSRNOG00000014460	51.0565	17	8	8.03415	no	no
ENSRNOG00000014866	37.1453	13	0	0.985743	no	no
ENSRNOG00000019406	161.161	1	54	54.5028	yes	yes
ENSRNOG00000027024	87.5821	13	30	30.5207	no	no
ENSRNOG00000016975	73.3048	3	96	96.3317	no	no
ENSRNOG00000003069	53.0354	14	44	43.8936	no	no
ENSRNOG00000013487	60.7765	9	40	40.8662	no	no
ENSRNOG00000012561	36.0623	16	56	55.2893	no	no
ENSRNOG00000004494	210.646	7	12	12.3614	no	yes
ENSRNOG00000003719	143.25	10	42	42.3127	no	no
ENSRNOG00000008118	331.752	5	90	89.3823	no	yes
ENSRNOG00000017021	45.9639	1	104	103.933	no	no
ENSRNOG00000000815	38.4043	20	30	29.785	no	no
ENSRNOG00000016090	240.807	1	78	77.5904	no	yes
ENSRNOG00000008868	35.173	3	52	51.7918	yes	no
ENSRNOG00000000586	45.2875	20	38	38.2746	no	no
ENSRNOG00000014605	327.655	16	60	60.77	no	yes
ENSRNOG00000006472	348.881	6	60	59.9174	no	yes
ENSRNOG00000014002	169.857	2	100	99.0333	no	yes
ENSRNOG00000009730	144.958	2	60	60.2189	no	yes
ENSRNOG00000015717	54.568	1	120	120.698	no	no
ENSRNOG00000043295	438.148	10	84	83.7618	yes	no
ENSRNOG00000016794	278.462	3	6	5.08936	no	yes
ENSRNOG00000003276	112.85	10	58	57.9604	no	yes
ENSRNOG00000030633	345.637	7	94	94.9897	no	yes
ENSRNOG00000005616	83.7677	3	106	106.639	no	no
ENSRNOG00000005053	158.186	6	50	50.3951	no	yes
ENSRNOG00000003964	856.617	7	68	68.7504	no	yes
ENSRNOG00000014762	35.5669	5	84	84.1813	no	no
ENSRNOG00000001249	208.581	20	2	2.01237	no	yes
ENSRNOG00000024535	307.368	10	52	51.003	no	yes
ENSRNOG00000025545	85.3328	10	0	0.984862	no	no
ENSRNOG00000027295	970.849	8	52	51.1952	no	yes
ENSRNOG00000002710	190.475	13	48	48.8643	no	yes
ENSRNOG00000014511	65.8154	7	96	95.9388	no	no
ENSRNOG00000012196	286.539	1	148	148.128	no	yes
ENSRNOG00000001602	159.015	11	16	15.8024	no	no
ENSRNOG00000007476	87.0063	8	36	36.0779	no	no
ENSRNOG00000018714	52.1621	17	56	56.5999	no	no
ENSRNOG00000023280	35.7331	9	44	44.0268	no	no
ENSRNOG00000005931	42.7643	7	54	53.9924	no	no
ENSRNOG00000043105	79.861	5	30	30.9711	no	no
ENSRNOG00000042426	35.4119	16	26	26.4346	no	yes
ENSRNOG00000039265	90.2875	17	18	17.2777	no	no
ENSRNOG00000018119	131.173	1	120	119.368	no	no
ENSRNOG00000010537	864.462	8	50	49.91	no	yes
ENSRNOG00000042603	53.4513	5	58	58.3568	no	no
ENSRNOG00000016587	517.98	17	0	0.446724	no	yes
ENSRNOG00000008474	199.655	14	52	51.7284	no	yes
ENSRNOG00000007164	57.9416	8	50	49.1563	no	no
ENSRNOG00000015869	760.963	8	82	81.3306	yes	yes
ENSRNOG00000000155	57.7458	15	32	31.8597	no	no
ENSRNOG00000012333	50.372	16	56	55.2416	no	no
ENSRNOG00000001336	60.0642	12	36	35.7157	no	no
ENSRNOG00000014691	97.5253	1	102	102.652	no	no
ENSRNOG00000015227	95.1205	9	36	35.3913	no	no
ENSRNOG00000016489	56.1342	1	78	77.9033	no	no
ENSRNOG00000031081	432.671	7	0	0	no	yes
ENSRNOG00000016867	101.806	17	0	0	no	no
ENSRNOG00000043107	174.168	11	38	37.9961	no	yes
ENSRNOG00000012880	316.965	3	100	99.4266	no	yes
ENSRNOG00000015546	187.155	18	10	10.1767	yes	yes
ENSRNOG00000025285	277.878	2	8	8.10362	no	yes
ENSRNOG00000004737	782.693	13	44	43.4013	no	no
ENSRNOG00000017258	75.5521	9	44	44.6518	no	no
ENSRNOG00000027193	40.1519	3	4	3.45493	no	no
ENSRNOG00000018118	250.832	5	114	114.69	no	yes
ENSRNOG00000013504	40.1763	1	50	50.7256	yes	no
ENSRNOG00000012954	72.4735	4	68	67.3589	yes	no
ENSRNOG00000025145	71.3668	5	20	20.0135	no	no
ENSRNOG00000008708	49.4615	7	82	81.5166	no	no
ENSRNOG00000018491	50.8302	3	74	73.5578	no	no
ENSRNOG00000031993	498.302	7	0	0	no	yes
ENSRNOG00000020229	85.4813	16	12	12.5405	no	no
ENSRNOG00000008517	70.3939	7	84	84.3594	no	no
ENSRNOG00000009983	76.7824	5	76	75.3774	no	no
ENSRNOG00000007763	51.1036	5	106	106.716	no	no
ENSRNOG00000003717	35.518	13	50	50.0503	no	no
ENSRNOG00000004736	40.6688	13	32	32.8816	no	no
ENSRNOG00000012853	48.9398	19	0	0.526872	no	no
ENSRNOG00000012962	437.232	8	86	85.5646	yes	yes
ENSRNOG00000017319	134.239	3	74	73.3083	no	no
ENSRNOG00000009958	54.6686	8	42	42.7417	no	no
ENSRNOG00000007713	144.407	7	14	13.3757	no	no
ENSRNOG00000027433	684.934	4	40	40.9822	no	yes
ENSRNOG00000011058	221.566	1	4	4.16375	no	yes
ENSRNOG00000022141	38.6349	3	70	69.9078	no	no
ENSRNOG00000017545	73.9267	17	26	26.0519	no	no
ENSRNOG00000042017	47.7363	18	20	19.4819	yes	no
ENSRNOG00000015977	327.105	8	50	50.6383	no	yes
ENSRNOG00000019489	80.0009	1	34	33.9187	no	no
ENSRNOG00000015030	219.901	1	142	141.738	no	yes
ENSRNOG00000007660	2402.02	6	60	60.0967	no	yes
ENSRNOG00000005248	77.0642	14	72	71.9297	no	no
ENSRNOG00000017310	42.2219	2	104	104.602	no	no
ENSRNOG00000007970	46.72	7	14	13.6785	no	no
ENSRNOG00000007125	35.7845	14	72	72.9378	no	no
ENSRNOG00000011407	112.733	16	34	33.1051	no	no
ENSRNOG00000005713	512.393	8	6	5.17887	no	yes
ENSRNOG00000016177	114.052	15	30	29.1655	no	no
ENSRNOG00000003515	219.673	13	50	49.9279	no	yes
ENSRNOG00000004162	283.149	13	10	9.87371	no	yes
ENSRNOG00000020862	241.816	8	88	88.8566	yes	yes
ENSRNOG00000008106	74.4149	7	54	53.198	no	no
ENSRNOG00000001300	91.9206	12	36	36.0694	no	no
ENSRNOG00000019063	72.7819	18	34	33.599	yes	no
ENSRNOG00000001874	146.115	11	54	55.4	no	no
ENSRNOG00000042755	343.024	3	116	118.4	no	yes
ENSRNOG00000008297	35.925	3	104	104.193	no	no
ENSRNOG00000014049	45.9682	17	12	12.9204	no	no
ENSRNOG00000001215	37.732	20	0	0.0567691	no	no
ENSRNOG00000026517	116.398	1	64	64.4959	no	no
ENSRNOG00000001267	108.836	20	2	2.30339	no	no
ENSRNOG00000024411	500.628	16	20	19.573	no	yes
ENSRNOG00000002458	1705.15	10	66	65.7408	no	yes
ENSRNOG00000010637	43.7759	9	2	1.87994	no	no
ENSRNOG00000014305	35.8567	5	102	101.511	no	no
ENSRNOG00000031175	62.6671	9	50	49.9052	no	no
ENSRNOG00000022392	49.7238	12	44	44.5192	no	no
ENSRNOG00000018179	39.5496	16	4	4.11396	no	no
ENSRNOG00000014660	93.5182	2	116	115.187	no	no
ENSRNOG00000005330	39.383	10	6	6.33756	yes	no
ENSRNOG00000010977	104.381	7	106	106.469	no	no
ENSRNOG00000031328	59.9337	1	52	52.761	yes	no
ENSRNOG00000025034	576.04	5	112	112.737	no	yes
ENSRNOG00000026211	78.6649	19	16	16.4658	no	no
ENSRNOG00000021007	52.9129	1	130	129.582	no	no
ENSRNOG00000013336	136.926	2	40	40.7673	no	no
ENSRNOG00000023300	58.5144	16	8	7.14214	no	no
ENSRNOG00000004962	542.678	7	4	3.78848	no	yes
ENSRNOG00000014030	183.432	1	80	80.2587	no	yes
ENSRNOG00000009974	1536.04	5	22	21.9819	no	no
ENSRNOG00000017644	201.163	17	52	52.2775	no	yes
ENSRNOG00000001317	165.459	12	12	11.1928	no	no
ENSRNOG00000016443	71.6283	5	106	105.182	no	no
ENSRNOG00000016873	40.0825	17	58	59.4	no	no
ENSRNOG00000019138	240.308	1	64	64.1294	no	yes
ENSRNOG00000004033	157.397	18	20	20.5477	yes	yes
ENSRNOG00000000394	55.8197	20	22	21.8627	no	no
ENSRNOG00000011519	52.0912	4	4	3.14573	no	no
ENSRNOG00000009601	49.025	8	76	75.535	yes	no
ENSRNOG00000016497	123.091	17	12	12.1108	no	yes
ENSRNOG00000010780	728.802	16	32	32.7505	no	yes
ENSRNOG00000018944	419.115	1	150	150.282	no	yes
ENSRNOG00000027282	89.6078	14	72	71.8177	no	no
ENSRNOG00000013694	42.0202	3	4	4.11448	no	no
ENSRNOG00000001294	46.6708	12	36	36.3324	no	no
ENSRNOG00000011164	400.377	6	68	67.6874	no	yes
ENSRNOG00000009993	675.201	8	28	28.4447	no	yes
ENSRNOG00000011573	48.6176	7	106	106.506	no	no
ENSRNOG00000024702	130.598	3	116	115.433	no	no
ENSRNOG00000021261	43.5912	3	76	75.5685	no	no
ENSRNOG00000010719	134.195	5	108	107.401	no	no
ENSRNOG00000009470	118.947	15	12	11.0173	no	no
ENSRNOG00000012795	281.666	18	2	1.8171	no	yes
ENSRNOG00000038328	441.274	10	42	41.5503	no	yes
ENSRNOG00000015660	45.3763	1	6	5.09984	no	no
ENSRNOG00000015605	375.952	1	14	13.3206	no	yes
ENSRNOG00000012622	296.381	19	8	7.86813	no	yes
ENSRNOG00000010602	101.34	8	2	1.69199	no	no
ENSRNOG00000019978	146.319	16	4	4.9493	no	no
ENSRNOG00000007732	38.0842	3	58	57.1406	no	no
ENSRNOG00000025372	347.272	8	48	48.7692	no	yes
ENSRNOG00000004777	104.311	3	82	82.0754	no	no
ENSRNOG00000006485	174.467	5	36	36.8829	no	yes
ENSRNOG00000010694	1130.68	8	64	64.6082	no	yes
ENSRNOG00000010483	157.249	2	86	86.9138	no	no
ENSRNOG00000015285	219.763	3	56	56.7393	no	yes
ENSRNOG00000011260	127.864	2	52	52.5045	no	no
ENSRNOG00000010799	56.2423	2	76	75.431	no	no
ENSRNOG00000015547	106.706	1	146	145.744	no	no
ENSRNOG00000003076	370.641	7	0	0	no	yes
ENSRNOG00000009821	77.571	2	86	85.6539	no	no
ENSRNOG00000014797	44.5472	9	56	56.5348	no	no
ENSRNOG00000008137	447.554	13	12	11.2149	no	yes
ENSRNOG00000006744	37.7248	6	68	68.4695	no	no
ENSRNOG00000030568	41.8859	14	52	52.1679	no	no
ENSRNOG00000003649	135.664	13	32	32.015	no	no
ENSRNOG00000024794	64.1344	11	50	49.176	no	no
ENSRNOG00000001037	48.159	15	32	32.2135	no	no
ENSRNOG00000010141	129.495	7	88	88.8917	no	yes
ENSRNOG00000019317	368.389	8	46	46.3798	no	yes
ENSRNOG00000021117	37.4246	1	130	129.982	no	no
ENSRNOG00000019339	209.331	3	10	10.0199	no	yes
ENSRNOG00000006050	37.1952	3	54	53.5573	no	no
ENSRNOG00000005652	53.9187	4	80	79.3417	yes	no
ENSRNOG00000002759	99.2764	14	30	30.9602	no	no
ENSRNOG00000043448	357.087	17	58	59.4	no	yes
ENSRNOG00000017914	100.76	1	102	101.131	no	no
ENSRNOG00000005849	116.638	5	36	36.8101	no	no
ENSRNOG00000010650	244.913	6	62	61.7793	no	yes
ENSRNOG00000002244	81.245	14	26	25.2847	no	no
ENSRNOG00000038868	40.251	11	46	45.7065	no	no
ENSRNOG00000010257	39.1459	10	64	63.7811	no	no
ENSRNOG00000030294	55.3679	6	4	4.34671	no	no
ENSRNOG00000030225	41.4701	8	50	50.4162	no	no
ENSRNOG00000013160	87.5376	1	0	0.368361	no	no
ENSRNOG00000010914	260.926	6	62	61.8052	no	yes
ENSRNOG00000025317	491.708	6	8	7.5	no	yes
ENSRNOG00000010017	64.5218	1	104	103.196	no	no
ENSRNOG00000017840	331.499	18	14	14.2493	yes	yes
ENSRNOG00000013620	35.0553	17	32	31.911	no	no
ENSRNOG00000003291	1530.69	13	38	38.9757	no	no
ENSRNOG00000020583	139.857	1	64	64.7569	no	no
ENSRNOG00000008950	44.9726	6	34	33.1807	no	no
ENSRNOG00000004424	230.566	13	14	13.6225	no	yes
ENSRNOG00000030449	779.09	8	58	58.9509	no	yes
ENSRNOG00000026978	37.7429	5	86	86.7122	no	no
ENSRNOG00000025462	563.009	2	6	6.80203	no	yes
ENSRNOG00000002610	1055.29	10	2	2.47634	yes	yes
ENSRNOG00000017962	87.6134	17	18	17.5696	no	no
ENSRNOG00000023152	291.615	5	108	108.623	no	yes
ENSRNOG00000021061	51.3147	1	130	129.733	no	no
ENSRNOG00000006334	43.2534	15	12	12.8101	no	no
ENSRNOG00000024085	57.9334	9	44	43.95	no	no
ENSRNOG00000003308	489.723	13	44	44.7255	no	yes
ENSRNOG00000014155	68.5218	2	78	77.3591	no	no
ENSRNOG00000004577	85.8395	6	8	7.5	no	no
ENSRNOG00000000387	121.154	20	18	17.3641	no	no
ENSRNOG00000028816	53.467	7	0	0	no	no
ENSRNOG00000001199	60.3444	12	44	45.3	no	no
ENSRNOG00000013452	61.1906	3	62	62.7357	no	no
ENSRNOG00000010697	57.728	2	124	124.756	no	no
ENSRNOG00000004556	84.3744	6	64	63.2864	no	no
ENSRNOG00000031612	84.3424	7	0	0	no	no
ENSRNOG00000007102	41.3654	3	94	93.1097	no	no
ENSRNOG00000019118	209.187	3	106	106.042	no	yes
ENSRNOG00000005279	37.7176	6	8	7.5	no	no
ENSRNOG00000015085	121.086	1	54	54.0781	yes	no
ENSRNOG00000008781	129.97	6	70	69.0096	yes	no
ENSRNOG00000001555	125.241	11	8	8.41052	no	no
ENSRNOG00000001493	100.666	1	54	53.5672	yes	no
ENSRNOG00000003795	287.965	13	52	53.7	no	yes
ENSRNOG00000026178	456.62	8	48	47.2558	no	yes
ENSRNOG00000014010	36.5445	15	30	30.5053	no	no
ENSRNOG00000034013	64.0951	10	60	60.8015	no	no
ENSRNOG00000010210	300.015	2	76	75.0419	no	yes
ENSRNOG00000010024	126.23	8	66	65.491	yes	no
ENSRNOG00000030510	35.7141	4	40	40.5227	no	no
ENSRNOG00000005087	232.484	6	8	7.5	no	yes
ENSRNOG00000014046	188.007	2	78	77.2625	no	yes
ENSRNOG00000008174	72.9437	7	6	5.60068	no	no
ENSRNOG00000012634	224.414	5	40	39.3686	no	yes
ENSRNOG00000013013	71.9514	8	48	48.4245	no	no
ENSRNOG00000007271	155.49	6	66	65.2266	no	yes
ENSRNOG00000001311	139.911	20	4	4.72382	no	no
ENSRNOG00000017752	127.226	2	12	11.3196	no	no
ENSRNOG00000008984	442.653	8	62	62.3802	no	yes
ENSRNOG00000019949	141.629	1	56	56.2386	yes	yes
ENSRNOG00000032165	673.15	11	20	20.1808	no	yes
ENSRNOG00000010407	48.2984	4	92	92.9492	yes	no
ENSRNOG00000039247	38.5739	4	38	38.988	no	no
ENSRNOG00000018547	40.6392	1	88	88.2181	no	no
ENSRNOG00000002177	132.803	14	30	29.1056	no	no
ENSRNOG00000000565	175.645	20	20	20.4392	no	yes
ENSRNOG00000002615	251.474	10	2	2.49169	yes	yes
ENSRNOG00000019266	44.4491	1	132	131.243	no	no
ENSRNOG00000024019	48.1797	20	12	11.7227	no	no
ENSRNOG00000018053	176.949	18	36	36.316	yes	yes
ENSRNOG00000004473	41.9202	14	38	38.5497	no	no
ENSRNOG00000005348	601.017	3	62	61.5217	no	yes
ENSRNOG00000043108	477.267	17	58	59.4	no	yes
ENSRNOG00000014616	148.068	17	0	0	no	no
ENSRNOG00000021156	275.691	1	130	130.079	no	yes
ENSRNOG00000000534	53.6009	20	0	0	no	no
ENSRNOG00000006789	57.793	7	54	53.0301	no	no
ENSRNOG00000018373	155.96	8	52	51.4529	no	no
ENSRNOG00000024460	1333.29	1	78	78.4896	no	yes
ENSRNOG00000000145	434.192	5	80	79.7289	no	yes
ENSRNOG00000015150	311.554	19	62	61.637	no	yes
ENSRNOG00000003841	38.786	13	52	53.7	no	no
ENSRNOG00000016245	46.6724	19	16	15.3853	no	no
ENSRNOG00000036790	430.197	1	102	101.923	no	yes
ENSRNOG00000001228	85.0876	20	2	1.1643	no	no
ENSRNOG00000013101	178.804	15	36	35.8342	no	yes
ENSRNOG00000040145	267.05	1	10	9.49767	no	yes
ENSRNOG00000020004	66.3163	19	62	63.8	no	no
ENSRNOG00000010545	925.593	8	66	65.5649	yes	yes
ENSRNOG00000010437	316.299	16	6	6.40936	no	yes
ENSRNOG00000004505	47.2135	7	2	1.5994	no	no
ENSRNOG00000008236	134.111	5	16	16.9995	no	yes
ENSRNOG00000014087	41.2678	19	8	8.02847	no	no
ENSRNOG00000017766	104.544	8	52	51.1514	no	no
ENSRNOG00000007979	196.873	3	44	43.9103	yes	yes
ENSRNOG00000003827	38.7694	10	86	86.5856	yes	no
ENSRNOG00000020379	52.9275	19	34	33.9256	no	no
ENSRNOG00000028166	38.4988	12	12	11.6022	no	no
ENSRNOG00000034022	42.4856	7	66	65.8069	no	no
ENSRNOG00000011625	152.935	16	34	34.0719	no	yes
ENSRNOG00000027040	82.6555	15	70	71.9	yes	no
ENSRNOG00000020456	193.57	1	108	107.217	no	yes
ENSRNOG00000033514	37.2423	7	2	1.60288	no	no
ENSRNOG00000006784	615.309	4	64	64.6632	yes	yes
ENSRNOG00000004739	45.4938	15	70	71.9	yes	no
ENSRNOG00000001930	42.1753	11	52	51.999	no	no
ENSRNOG00000022896	69.2246	7	88	88.6149	no	no
ENSRNOG00000014090	648.414	4	60	60.4581	yes	yes
ENSRNOG00000016875	44.4083	7	86	85.681	no	no
ENSRNOG00000001795	39.1551	11	48	48.0204	no	no
ENSRNOG00000003232	462.312	10	94	94.3954	yes	no
ENSRNOG00000002697	531.891	18	0	0	no	yes
ENSRNOG00000016702	65.6878	1	114	114.022	no	no
ENSRNOG00000018801	103.299	19	60	59.7827	no	no
ENSRNOG00000020068	71.0006	8	88	88.0211	yes	no
ENSRNOG00000027797	310.075	11	28	27.1135	no	yes
ENSRNOG00000023077	57.4667	4	84	84.8831	yes	no
ENSRNOG00000011470	61.1185	3	4	3.64482	no	no
ENSRNOG00000019475	60.4433	16	4	4.38206	no	no
ENSRNOG00000000613	40.4886	20	10	10.6992	no	no
ENSRNOG00000020340	70.0621	18	16	16.7819	yes	no
ENSRNOG00000000043	1076.85	14	0	0.408197	no	yes
ENSRNOG00000001182	41.7455	20	0	0	no	no
ENSRNOG00000001556	615.414	3	48	48.7492	yes	yes
ENSRNOG00000020392	103.525	2	102	101.133	no	no
ENSRNOG00000027491	61.2572	1	144	143.998	no	no
ENSRNOG00000011274	52.4474	19	4	4.59254	no	no
ENSRNOG00000037595	175.476	5	80	79.8804	no	yes
ENSRNOG00000036883	69.2437	10	72	72.1366	no	no
ENSRNOG00000020360	336.642	2	102	101.056	no	yes
ENSRNOG00000003574	37.3742	13	46	45.3572	no	no
ENSRNOG00000026109	1046.73	1	64	64.6629	no	yes
ENSRNOG00000002714	227.827	10	2	2.61836	yes	yes
ENSRNOG00000006403	110.89	8	38	38.7506	no	no
ENSRNOG00000001072	110.062	12	0	0	no	no
ENSRNOG00000032391	1011.37	6	94	95.5901	yes	yes
ENSRNOG00000003146	153.462	10	0	0	no	no
ENSRNOG00000020217	38.7045	1	114	114.767	no	no
ENSRNOG00000020848	83.6669	1	56	55.6287	yes	no
ENSRNOG00000016062	83.9964	3	96	96.1523	no	no
ENSRNOG00000022402	37.4992	5	96	96.5437	no	no
ENSRNOG00000029510	342.809	8	88	88.3878	yes	yes
ENSRNOG00000014241	584.457	5	98	98.0035	no	yes
ENSRNOG00000002345	181.748	14	8	7.51282	no	yes
ENSRNOG00000006609	80.8047	14	72	74	no	no
ENSRNOG00000038012	205.501	15	58	57.5414	yes	yes
ENSRNOG00000021573	36.1578	1	58	58.9226	yes	no
ENSRNOG00000024410	145.93	1	56	55.7152	yes	yes
ENSRNOG00000004229	378.201	7	54	53.3499	no	yes
ENSRNOG00000020411	209.243	1	116	115.959	no	yes
ENSRNOG00000029792	215.601	17	0	0.00404917	no	yes
ENSRNOG00000015335	41.5688	19	62	61.6665	no	no
ENSRNOG00000002358	225.141	10	64	64.4571	no	yes
ENSRNOG00000005039	1653.67	3	54	53.4703	no	yes
ENSRNOG00000005686	160.962	4	72	71.4155	yes	yes
ENSRNOG00000011425	91.5242	5	46	46.9225	no	no
ENSRNOG00000039214	53.854	12	14	13.0913	no	no
ENSRNOG00000009195	61.8806	3	54	53.7189	no	no
ENSRNOG00000030149	164.649	14	20	19.4955	no	yes
ENSRNOG00000031173	77.6749	4	38	37.8779	no	no
ENSRNOG00000012638	43.8809	3	72	72.2974	no	no
ENSRNOG00000020804	118.981	8	88	88.6946	yes	no
ENSRNOG00000019308	235.917	10	50	49.1141	no	yes
ENSRNOG00000037947	1567.03	8	52	51.1776	no	yes
ENSRNOG00000012785	41.308	4	4	3.82636	no	no
ENSRNOG00000014927	47.8596	2	6	5.43756	no	no
ENSRNOG00000033522	55.5863	5	104	103.591	no	no
ENSRNOG00000020876	97.5782	1	66	65.0484	no	no
ENSRNOG00000012438	75.0947	8	48	48.0094	no	no
ENSRNOG00000006777	209.859	6	30	29.7953	no	yes
ENSRNOG00000000275	224.921	20	12	11.4501	no	yes
ENSRNOG00000042960	173.435	15	36	35.2903	no	yes
ENSRNOG00000009069	59.0787	10	54	54.7366	no	no
ENSRNOG00000013974	49.8702	3	72	72.3774	no	no
ENSRNOG00000028946	72.9517	10	92	92.1496	yes	no
ENSRNOG00000031834	290.34	3	116	117.595	no	yes
ENSRNOG00000011586	41.0248	2	82	81.7338	no	no
ENSRNOG00000012690	79.9333	1	72	72.5533	no	no
ENSRNOG00000019915	37.1166	1	54	54.6389	yes	no
ENSRNOG00000019490	55.8142	16	50	49.6916	no	no
ENSRNOG00000002588	48.059	10	0	0.803707	no	no
ENSRNOG00000012873	915.309	2	82	82.4528	no	yes
ENSRNOG00000009325	147.016	5	96	95.9345	no	yes
ENSRNOG00000005286	651.901	6	50	49.1269	no	yes
ENSRNOG00000018114	144.487	10	48	48.8099	no	no
ENSRNOG00000037850	55.2862	13	52	52.8533	no	no
ENSRNOG00000011468	44.6029	1	50	50.7116	yes	no
ENSRNOG00000013572	704.42	2	82	82.4565	no	yes
ENSRNOG00000007506	57.2144	5	24	24.6533	no	no
ENSRNOG00000019263	54.717	3	46	46.565	yes	no
ENSRNOG00000019122	42.541	3	0	0.658925	no	no
ENSRNOG00000019014	40.8782	18	32	31.2211	yes	no
ENSRNOG00000014520	37.6973	16	58	58.648	no	no
ENSRNOG00000015225	304.456	18	26	26.179	yes	yes
ENSRNOG00000005710	91.7541	8	42	41.6582	no	no
ENSRNOG00000020659	147.449	8	12	11.4731	no	yes
ENSRNOG00000003767	323.237	13	52	53.7	no	yes
ENSRNOG00000012724	50.8626	5	76	75.8302	no	no
ENSRNOG00000001204	72.771	12	44	45.3	no	no
ENSRNOG00000009653	58.4278	6	68	67.1871	no	no
ENSRNOG00000007221	193.38	3	72	71.4228	no	yes
ENSRNOG00000011203	36.6361	15	70	71.9	yes	no
ENSRNOG00000026036	553.509	3	74	73.9315	no	yes
ENSRNOG00000017679	238.713	1	102	101.108	no	yes
ENSRNOG00000001817	371.161	4	104	106.7	no	yes
ENSRNOG00000027582	249.117	1	124	123.041	no	yes
ENSRNOG00000016475	568.804	10	76	75.3537	yes	yes
ENSRNOG00000005487	232.834	7	8	7.97754	no	yes
ENSRNOG00000023376	308.491	18	2	1.96955	no	yes
ENSRNOG00000013306	61.5211	15	44	44.5326	no	no
ENSRNOG00000001708	81.1749	11	54	55.4	no	no
ENSRNOG00000011831	78.8717	15	30	30.4463	no	no
ENSRNOG00000011663	59.7044	8	76	76.4	yes	no
ENSRNOG00000004198	44.0289	6	46	45.7641	no	no
ENSRNOG00000042044	39.5765	10	72	72.6914	no	no
ENSRNOG00000007254	304.848	6	66	65.1308	no	yes
ENSRNOG00000019977	268.31	5	80	80.9996	no	yes
ENSRNOG00000011379	170.587	3	70	69.5176	no	yes
ENSRNOG00000009265	52.4093	7	78	77.926	no	no
ENSRNOG00000020498	704.081	1	54	54.946	yes	yes
ENSRNOG00000009772	83.7163	8	28	28.3121	no	no
ENSRNOG00000007574	129.132	5	102	101.249	no	no
ENSRNOG00000015124	45.0434	1	162	164.3	no	no
ENSRNOG00000024414	50.0794	1	118	117.106	no	no
ENSRNOG00000003307	39.4866	19	16	16.2106	no	no
ENSRNOG00000019996	128.887	2	98	98.8894	no	no
ENSRNOG00000020696	137.171	2	92	91.7071	no	no
ENSRNOG00000010029	56.6268	10	94	95.3	yes	no
ENSRNOG00000010091	48.4991	5	80	79.4951	no	no
ENSRNOG00000003338	48.4884	10	44	44	no	no
ENSRNOG00000038166	62.5618	6	68	67.6293	no	no
ENSRNOG00000012260	46.5769	8	28	28.7972	no	no
ENSRNOG00000042916	49.5079	20	30	30.8821	no	no
ENSRNOG00000001517	862.613	3	46	45.6943	yes	yes
ENSRNOG00000019276	1235.46	18	18	17.8449	yes	yes
ENSRNOG00000031346	45.3936	12	18	17.3485	no	no
ENSRNOG00000011541	101.561	10	94	95.3	yes	no
ENSRNOG00000015020	56.1308	9	48	48.765	no	no
ENSRNOG00000008870	82.817	4	102	102.105	no	no
ENSRNOG00000017210	49.6279	17	18	17.1832	no	no
ENSRNOG00000030410	368.009	12	0	0	no	yes
ENSRNOG00000001766	377.97	11	48	48.7914	no	yes
ENSRNOG00000003461	47.4836	19	18	17.0926	no	no
ENSRNOG00000006328	53.7916	5	20	20.0492	no	no
ENSRNOG00000013111	71.3708	15	18	17.2824	no	no
ENSRNOG00000016751	51.027	1	156	156.713	no	no
ENSRNOG00000039510	181.589	10	8	8.26924	yes	yes
ENSRNOG00000005297	75.1492	10	6	6.20567	yes	no
ENSRNOG00000021758	45.7885	4	38	38.3305	no	no
ENSRNOG00000016691	261.36	2	42	41.3054	no	yes
ENSRNOG00000001297	74.0157	20	2	2.7389	no	no
ENSRNOG00000012684	125.437	1	158	158.198	no	no
ENSRNOG00000019342	72.2756	1	114	114.53	no	no
ENSRNOG00000008364	58.3005	3	62	61.8681	no	no
ENSRNOG00000020624	152.271	1	118	117.908	no	no
ENSRNOG00000019960	79.9341	1	114	114.664	no	no
ENSRNOG00000005032	85.5489	13	14	13.9857	no	no
ENSRNOG00000007871	161.722	14	56	55.0412	no	no
ENSRNOG00000010280	317.232	2	6	6.8379	no	yes
ENSRNOG00000012016	158.165	18	2	2.01826	no	no
ENSRNOG00000019975	262.642	9	8	7.24993	no	yes
ENSRNOG00000003330	35.4933	10	70	69.0947	no	no
ENSRNOG00000001344	224.758	12	38	37.4322	no	yes
ENSRNOG00000006720	77.6168	13	14	14.4447	no	no
ENSRNOG00000017136	136.576	1	108	108.528	no	no
ENSRNOG00000042789	48.3472	12	38	37.8245	no	no
ENSRNOG00000003026	54.042	19	16	16.2301	no	no
ENSRNOG00000002795	44.1846	10	92	92.0436	yes	no
ENSRNOG00000012874	137.233	1	84	84.6495	no	no
ENSRNOG00000009263	129.452	6	84	84.7556	yes	no
ENSRNOG00000010814	186.244	16	6	6.44064	no	yes
ENSRNOG00000008277	41.2784	5	38	37.3422	no	no
ENSRNOG00000015153	45.6772	2	92	92.0468	no	no
ENSRNOG00000006327	57.9419	5	102	101.002	no	no
ENSRNOG00000016380	997.077	3	96	96.2933	no	yes
ENSRNOG00000008666	1697.33	17	58	59.4	no	yes
ENSRNOG00000004793	641.663	7	2	1.58298	no	yes
ENSRNOG00000015939	36.964	15	30	29.1075	no	no
ENSRNOG00000003469	47.5684	19	16	16.1969	no	no
ENSRNOG00000006947	71.5601	3	62	61.7022	no	no
ENSRNOG00000036687	149.853	10	94	95.3	yes	no
ENSRNOG00000003721	476.859	10	8	7.44172	yes	yes
ENSRNOG00000020596	144.128	1	56	55.0323	yes	no
ENSRNOG00000000463	112.954	20	0	0	no	no
ENSRNOG00000031816	100.353	8	88	88.2056	yes	no
ENSRNOG00000000551	58.7932	20	22	21.5745	no	no
ENSRNOG00000024867	67.7786	10	8	8.3906	yes	no
ENSRNOG00000026364	45.9794	10	82	82.3782	yes	no
ENSRNOG00000020867	194.846	1	56	55.6382	yes	yes
ENSRNOG00000004755	326.281	3	62	61.2194	no	yes
ENSRNOG00000000314	67.0377	20	40	40.8302	no	no
ENSRNOG00000019983	76.8839	10	76	76.2279	yes	no
ENSRNOG00000010219	90.666	3	4	3.52109	no	no
ENSRNOG00000003958	46.5301	18	20	20.4671	yes	no
ENSRNOG00000011202	469.297	3	116	117.687	no	yes
ENSRNOG00000005585	72.9339	6	50	49.151	no	no
ENSRNOG00000016364	321.649	5	38	38.4309	no	yes
ENSRNOG00000015763	239.641	4	66	66.0439	yes	yes
ENSRNOG00000012549	110.361	2	136	136.391	no	no
ENSRNOG00000015496	66.7677	16	12	11.5784	no	no
ENSRNOG00000006911	47.4364	6	60	60.0115	no	no
ENSRNOG00000002860	67.1053	13	38	38.0394	no	no
ENSRNOG00000002627	187.196	13	52	53.7	no	yes
ENSRNOG00000022802	45.9989	7	84	84.9035	no	no
ENSRNOG00000008316	159.632	3	70	69.1291	no	no
ENSRNOG00000011019	81.3267	5	80	79.6322	no	no
ENSRNOG00000004912	1619.01	3	54	53.1966	no	yes
ENSRNOG00000018655	52.9843	7	86	86.739	no	no
ENSRNOG00000018293	53.2201	2	100	100.519	no	no
ENSRNOG00000006400	258.201	14	52	51.0183	no	yes
ENSRNOG00000013656	78.3399	5	48	47.4847	no	no
ENSRNOG00000016218	682.064	1	114	113.815	no	yes
ENSRNOG00000003326	310.08	10	0	0	no	yes
ENSRNOG00000005437	314.687	7	54	54.8574	no	yes
ENSRNOG00000009481	677.169	15	14	13.1266	no	yes
ENSRNOG00000010729	378.388	3	72	72.1043	no	yes
ENSRNOG00000039017	169.896	11	40	39.3328	no	yes
ENSRNOG00000002724	82.9902	10	44	43.0984	no	no
ENSRNOG00000004337	63.1928	13	32	32.7778	no	no
ENSRNOG00000002347	46.3949	13	30	29.6203	no	no
ENSRNOG00000019693	40.8418	1	100	99.3104	no	no
ENSRNOG00000011535	39.7343	19	52	51.325	no	no
ENSRNOG00000010169	426.124	5	80	79.5142	no	yes
ENSRNOG00000009039	274.509	6	34	33.2168	no	yes
ENSRNOG00000030520	582.636	7	0	0.0305572	no	yes
ENSRNOG00000018350	67.9772	1	162	164.3	no	no
ENSRNOG00000016705	89.0073	17	16	16.5035	no	no
ENSRNOG00000017851	3250.46	1	64	63.3618	no	yes
ENSRNOG00000020996	54.9907	1	130	129.458	no	no
ENSRNOG00000023480	41.6593	7	0	0	no	no
ENSRNOG00000005418	72.1533	10	6	6.40768	yes	no
ENSRNOG00000019294	633.264	9	58	57.2216	no	yes
ENSRNOG00000015268	42.2705	1	146	145.477	no	no
ENSRNOG00000010320	194.955	10	48	48.502	no	yes
ENSRNOG00000039464	84.339	4	36	35.8099	no	no
ENSRNOG00000001331	150.908	12	36	35.9083	no	no
ENSRNOG00000026849	44.7505	20	18	17.4408	no	no
ENSRNOG00000001629	74.4138	11	22	21.9438	no	no
ENSRNOG00000002506	61.1851	14	12	11.6922	no	no
ENSRNOG00000017250	305.388	17	4	4.48401	no	yes
ENSRNOG00000012736	57.9855	1	130	129.23	no	no
ENSRNOG00000019143	121.076	19	62	63.1234	no	no
ENSRNOG00000023226	131.163	2	94	93.376	no	no
ENSRNOG00000012749	37.9375	5	96	96.9175	no	no
ENSRNOG00000018170	168.955	16	12	12.0019	no	yes
ENSRNOG00000015177	39.3373	7	86	85.4985	no	no
ENSRNOG00000005024	55.9206	10	36	36.4551	yes	yes
ENSRNOG00000039002	723.61	10	26	25.7687	yes	yes
ENSRNOG00000003050	68.8755	10	36	35.1478	yes	no
ENSRNOG00000008065	47.0283	10	16	16.7344	yes	no
ENSRNOG00000032398	51.7342	9	76	76.3445	no	no
ENSRNOG00000003881	46.0085	13	44	43.0759	no	no
ENSRNOG00000021106	206.148	1	58	57.2489	yes	yes
ENSRNOG00000009255	195.331	8	12	11.9	no	yes
ENSRNOG00000042086	69.3205	10	8	8.09252	yes	no
ENSRNOG00000004553	598.149	13	48	47.9192	no	yes
ENSRNOG00000000157	376.464	18	20	20.3748	yes	yes
ENSRNOG00000020205	74.4393	5	114	115.1	no	no
ENSRNOG00000000894	63.2875	12	0	0	no	no
ENSRNOG00000018849	71.481	18	20	19.0282	yes	no
ENSRNOG00000001911	253.339	11	54	55.4	no	yes
ENSRNOG00000001304	80.5035	20	4	4.59599	no	no
ENSRNOG00000016031	35.6666	17	0	0.255977	no	no
ENSRNOG00000022444	59.642	15	32	31.76	no	no
ENSRNOG00000026793	44.768	7	6	6.53529	no	no
ENSRNOG00000018205	180.94	3	74	73.5231	no	yes
ENSRNOG00000024577	68.2027	7	2	1.84206	no	no
ENSRNOG00000007948	98.7392	14	56	55.0926	no	no
ENSRNOG00000017097	184.154	1	118	118.64	no	yes
ENSRNOG00000002129	241.262	14	4	3.12563	no	yes
ENSRNOG00000025296	632.308	3	6	5.06806	no	yes
ENSRNOG00000017621	171.24	1	114	114.288	no	yes
ENSRNOG00000032207	57.2284	14	32	31.7639	no	no
ENSRNOG00000014355	211.715	2	128	128.433	no	yes
ENSRNOG00000011077	70.7205	1	78	78.2264	no	no
ENSRNOG00000008924	173.349	8	38	38.0361	no	yes
ENSRNOG00000026490	140.864	13	36	36.6709	no	no
ENSRNOG00000017445	56.3694	17	18	17.3153	no	no
ENSRNOG00000019711	79.8408	18	28	28.4715	yes	no
ENSRNOG00000009421	172.273	3	68	68.5539	no	yes
ENSRNOG00000003953	219.279	13	6	6.89197	no	yes
ENSRNOG00000007374	203.622	4	22	22.5818	no	yes
ENSRNOG00000016050	63.6336	16	46	46.584	no	no
ENSRNOG00000005149	327.2	8	96	98.9	yes	yes
ENSRNOG00000010753	179.563	1	6	5.32497	no	yes
ENSRNOG00000042094	283.03	7	106	106.708	no	yes
ENSRNOG00000012942	98.9431	9	2	1.0652	no	no
ENSRNOG00000007006	120.21	6	2	2.99808	no	no
ENSRNOG00000011027	42.1508	8	84	84.7842	yes	no
ENSRNOG00000010119	77.9274	2	66	65.5574	no	no
ENSRNOG00000009592	177.02	7	88	88.6621	no	no
ENSRNOG00000018148	121.566	15	0	0	no	no
ENSRNOG00000021068	199.142	2	94	94.4912	no	yes
ENSRNOG00000008613	122.593	4	18	18.3064	no	no
ENSRNOG00000036698	135.023	10	94	95.3	yes	no
ENSRNOG00000020853	39.1195	8	88	88.8284	yes	no
ENSRNOG00000016452	55.5193	5	38	38.4259	no	no
ENSRNOG00000017206	272.039	9	56	55.2597	no	yes
ENSRNOG00000025625	216.2	15	16	16.8413	no	yes
ENSRNOG00000000708	45.9566	12	44	45.3	no	no
ENSRNOG00000005043	46.3874	14	44	44.3211	no	no
ENSRNOG00000017843	848.807	3	116	118.4	no	yes
ENSRNOG00000027623	37.3508	14	50	50.9496	no	no
ENSRNOG00000020875	38.8701	2	94	94.3154	no	no
ENSRNOG00000030245	107.122	11	54	55.4	no	no
ENSRNOG00000021087	2507.26	1	58	57.1865	yes	yes
ENSRNOG00000019914	56.6365	1	114	114.643	no	no
ENSRNOG00000038678	69.9471	11	48	48.5306	no	no
ENSRNOG00000008465	55.0004	4	48	48.9306	no	no
ENSRNOG00000008090	85.3579	5	76	76.6227	no	no
ENSRNOG00000012641	39.1043	1	162	161.286	no	no
ENSRNOG00000005825	38.9007	7	44	43.9235	no	no
ENSRNOG00000016671	66.0538	18	10	9.66041	yes	no
ENSRNOG00000031974	53.4272	2	72	72.1261	no	no
ENSRNOG00000002369	524.671	13	30	30.4761	no	yes
ENSRNOG00000013949	38.8076	1	88	88.8356	no	no
ENSRNOG00000026120	38.8477	17	4	3.32706	no	no
ENSRNOG00000021224	37.5632	3	74	74.5211	no	no
ENSRNOG00000021206	165.787	1	130	130.496	no	yes
ENSRNOG00000001143	72.8596	12	44	45.2051	no	no
ENSRNOG00000005796	307.987	18	16	16.9408	yes	yes
ENSRNOG00000011400	54.1509	2	54	54.8592	no	no
ENSRNOG00000000158	44.0332	18	20	20.3702	yes	no
ENSRNOG00000013023	2074.72	1	54	53.5283	yes	yes
ENSRNOG00000014984	68.5099	1	54	54.0741	yes	no
ENSRNOG00000031939	72.4636	9	4	3.06632	no	no
ENSRNOG00000042289	602.234	11	38	37.7442	no	yes
ENSRNOG00000024808	247.545	3	42	42.756	yes	yes
ENSRNOG00000009512	293.66	15	32	31.2263	no	yes
ENSRNOG00000023278	75.3539	17	52	52.4862	no	no
ENSRNOG00000017932	50.6954	19	40	40.709	no	no
ENSRNOG00000016338	66.8141	5	14	13.6781	no	no
ENSRNOG00000001214	49.3704	20	0	0.0316955	no	no
ENSRNOG00000000604	39.3373	20	34	34.6427	no	no
ENSRNOG00000001242	571.717	20	4	3.95031	no	yes
ENSRNOG00000009381	83.1537	8	56	56.8397	no	no
ENSRNOG00000012325	277.322	15	0	0	no	yes
ENSRNOG00000012106	38.1289	8	44	44.8533	no	no
ENSRNOG00000018149	41.9797	19	20	20.653	no	no
ENSRNOG00000007705	173.839	13	44	43.8762	no	yes
ENSRNOG00000004608	51.153	10	6	5.85394	yes	no
ENSRNOG00000019636	247.136	1	132	131.29	no	yes
ENSRNOG00000029336	53.4042	1	54	54.4264	yes	no
ENSRNOG00000018732	62.5634	2	100	100.659	no	no
ENSRNOG00000024539	162.227	5	36	36.8915	no	yes
ENSRNOG00000037298	39.0507	1	64	64.179	no	no
ENSRNOG00000022586	647.986	3	8	7.14223	no	yes
ENSRNOG00000032936	51.3907	7	96	95.185	no	no
ENSRNOG00000018387	77.4941	18	36	35.4518	yes	no
ENSRNOG00000007882	46.592	14	52	51.5646	no	no
ENSRNOG00000011775	37.7009	16	20	19.7681	no	no
ENSRNOG00000019682	89.3693	7	2	1.71033	no	no
ENSRNOG00000002818	342.674	10	78	78.537	yes	yes
ENSRNOG00000009689	141.267	3	58	57.9329	no	yes
ENSRNOG00000020317	48.9488	3	98	98.2058	no	no
ENSRNOG00000008755	90.7969	10	94	95.3	yes	no
ENSRNOG00000009345	103.231	2	118	118.732	no	no
ENSRNOG00000002142	50.0721	14	6	5.70294	no	no
ENSRNOG00000006591	46.8126	3	2	2.21904	no	no
ENSRNOG00000004477	69.083	10	28	27.9074	yes	no
ENSRNOG00000018691	49.8411	5	114	114.756	no	no
ENSRNOG00000005850	1189.12	5	0	0.00757115	no	yes
ENSRNOG00000029178	61.8672	11	54	55.4	no	no
ENSRNOG00000017911	69.6624	4	46	45.5785	no	no
ENSRNOG00000009102	93.111	15	14	13.0315	no	no
ENSRNOG00000012124	57.0267	2	16	15.2256	no	no
ENSRNOG00000042333	515.153	6	68	67.4688	no	yes
ENSRNOG00000011667	226.765	4	2	1.65396	no	yes
ENSRNOG00000014152	635.257	3	72	72.4007	no	yes
ENSRNOG00000008001	48.4425	5	76	76.677	no	no
ENSRNOG00000037984	105.647	13	48	48.9197	no	no
ENSRNOG00000000657	1953.27	13	18	17.9279	no	yes
ENSRNOG00000019932	120.565	8	88	87.7992	yes	no
ENSRNOG00000009715	107.644	8	66	65.1953	yes	no
ENSRNOG00000000412	118.696	20	24	24.036	no	no
ENSRNOG00000002301	54.7219	14	12	11.574	no	no
ENSRNOG00000043351	210.494	12	38	37.7336	no	yes
ENSRNOG00000009414	37.2696	4	86	85.0351	yes	no
ENSRNOG00000003661	1108.96	10	94	94.8068	yes	yes
ENSRNOG00000017091	453.015	18	16	15.2026	yes	yes
ENSRNOG00000016872	41.7916	2	108	108.92	no	no
ENSRNOG00000004309	87.1719	6	64	63.1348	no	no
ENSRNOG00000040205	170.434	16	0	0.853703	no	yes
ENSRNOG00000025274	172.08	2	8	8.13131	no	yes
ENSRNOG00000018145	76.9533	3	6	5.20819	no	no
ENSRNOG00000036813	825.255	3	98	98.2378	no	yes
ENSRNOG00000009994	67.5455	8	42	42.7566	no	no
ENSRNOG00000031364	151.986	10	50	49.3596	no	no
ENSRNOG00000009588	51.3916	3	94	93.5879	no	no
ENSRNOG00000022727	190.915	3	72	72.3011	no	yes
ENSRNOG00000024629	41.6803	6	16	16.5461	no	no
ENSRNOG00000026238	50.4561	8	46	46.8455	no	no
ENSRNOG00000008249	98.6745	6	52	51.1746	no	no
ENSRNOG00000013238	784.336	9	14	14.2025	no	yes
ENSRNOG00000006030	49.2536	4	34	34.7841	no	no
ENSRNOG00000019152	54.4128	3	98	97.2707	no	no
ENSRNOG00000018647	152.08	5	114	114.744	no	no
ENSRNOG00000007862	478.643	8	44	44.2623	no	yes
ENSRNOG00000007650	194.045	7	0	0.0432924	no	yes
ENSRNOG00000014453	38.6894	2	68	67.5838	no	no
ENSRNOG00000004650	68.4862	6	90	89.7763	yes	no
ENSRNOG00000016603	397.227	1	54	54.1615	yes	yes
ENSRNOG00000017990	54.4829	2	92	91.9062	no	no
ENSRNOG00000003312	425.424	13	14	13.3273	no	yes
ENSRNOG00000033205	68.6804	14	32	31.7	no	no
ENSRNOG00000007869	607.237	10	50	50.146	no	yes
ENSRNOG00000010984	239.596	16	0	0.941426	no	yes
ENSRNOG00000020010	56.5451	1	114	114.715	no	no
ENSRNOG00000010409	46.511	5	38	37.4747	no	no
ENSRNOG00000009982	1713.34	15	16	16.7369	no	yes
ENSRNOG00000018044	67.4325	17	54	53.1739	no	no
ENSRNOG00000018993	78.5243	1	102	101.254	no	no
ENSRNOG00000002100	61.0188	14	24	23.6548	no	no
ENSRNOG00000021781	40.2616	4	84	84.9163	yes	no
ENSRNOG00000020395	100.235	2	92	91.5404	no	no
ENSRNOG00000021232	181.503	3	74	74.5933	no	yes
ENSRNOG00000016923	79.2384	1	28	28.4825	no	no
ENSRNOG00000017493	86.2972	18	52	51.8905	no	no
ENSRNOG00000002524	47.1575	4	36	36.189	no	no
ENSRNOG00000017846	2184.88	5	44	44.9784	no	yes
ENSRNOG00000014525	35.6578	9	40	40.9582	no	no
ENSRNOG00000037566	86.9718	12	44	45.3	no	no
ENSRNOG00000019981	287.897	5	114	114.937	no	yes
ENSRNOG00000008659	144.414	17	58	59.4	no	no
ENSRNOG00000003583	106.902	13	52	53.7	no	no
ENSRNOG00000016423	44.8675	16	46	46.972	no	no
ENSRNOG00000016488	53.6417	3	106	105.533	no	no
ENSRNOG00000009166	302.684	6	84	84.7372	yes	yes
ENSRNOG00000014617	60.5835	4	60	60.4617	yes	no
ENSRNOG00000018991	78.375	3	10	9.49163	no	no
ENSRNOG00000003970	48.9436	19	16	16.1509	no	no
ENSRNOG00000005975	296.873	7	54	54.824	no	yes
ENSRNOG00000009313	50.939	14	52	52.0956	no	no
ENSRNOG00000012062	158.62	6	68	68.0143	no	no
ENSRNOG00000017406	253.933	1	162	164.3	no	yes
ENSRNOG00000018441	69.865	3	98	97.1227	no	no
ENSRNOG00000025764	195.383	19	8	8.74472	no	yes
ENSRNOG00000016619	81.8302	16	12	11.8428	no	no
ENSRNOG00000020058	107.406	2	100	100.913	no	no
ENSRNOG00000010311	105.987	15	70	71.7666	yes	no
ENSRNOG00000002349	43.4883	14	28	28.3594	no	no
ENSRNOG00000033627	222.353	7	94	94.6197	no	yes
ENSRNOG00000014779	157.256	1	162	164.3	no	no
ENSRNOG00000037453	60.8613	8	76	75.148	yes	no
ENSRNOG00000014819	150.532	10	76	75.2475	yes	yes
ENSRNOG00000007920	108.504	5	76	75.1895	no	no
ENSRNOG00000021079	236.58	1	58	57.1775	yes	yes
ENSRNOG00000017133	36.3469	17	0	0	no	no
ENSRNOG00000036835	193.58	7	106	107.418	no	yes
ENSRNOG00000008088	158.142	3	80	80.4478	no	yes
ENSRNOG00000004589	120.221	6	64	64.0903	no	no
ENSRNOG00000030127	69.7681	1	54	54.1219	yes	no
ENSRNOG00000012830	238.535	9	14	13.9471	no	yes
ENSRNOG00000020423	43.1027	18	16	16.6928	yes	no
ENSRNOG00000011268	76.3151	5	112	111.531	no	no
ENSRNOG00000000923	190.238	12	28	27.8959	no	yes
ENSRNOG00000009409	58.8066	5	106	106.969	no	no
ENSRNOG00000018019	39.0787	1	162	164.3	no	no
ENSRNOG00000014938	74.6945	1	74	73.3551	no	yes
ENSRNOG00000012180	149.66	9	0	0	no	no
ENSRNOG00000016924	288.905	10	76	75.4354	yes	yes
ENSRNOG00000004132	75.1025	10	72	72.1157	no	no
ENSRNOG00000013360	35.587	8	12	12.1623	no	no
ENSRNOG00000011441	866.188	2	58	57.288	no	yes
ENSRNOG00000014806	45.3598	9	56	56.5594	no	no
ENSRNOG00000029370	96.3604	18	0	0.773488	no	no
ENSRNOG00000013290	144.116	1	104	103.021	no	yes
ENSRNOG00000018242	91.469	10	52	51.1341	no	no
ENSRNOG00000025832	186.04	3	4	4.9087	no	yes
ENSRNOG00000004810	82.5996	3	78	77.8416	no	no
ENSRNOG00000029799	44.7316	3	104	104.786	no	no
ENSRNOG00000001964	90.7148	11	34	33.7719	no	no
ENSRNOG00000023338	299.457	2	98	97.9085	no	yes
ENSRNOG00000007364	260.853	6	60	60.0666	no	yes
ENSRNOG00000026638	35.5751	8	46	46.2977	no	no
ENSRNOG00000023935	61.9193	3	94	94.3128	no	no
ENSRNOG00000016358	275.562	1	78	77.751	no	yes
ENSRNOG00000001640	40.9133	11	28	27.1324	no	no
ENSRNOG00000023720	91.42	8	22	21.1452	no	no
ENSRNOG00000016470	2004.56	9	72	71.9256	no	yes
ENSRNOG00000007775	109.875	5	80	79.1817	no	no
ENSRNOG00000001205	40.8769	20	0	0	no	no
ENSRNOG00000017149	57.7395	4	46	45.3457	no	no
ENSRNOG00000006001	103.386	4	44	43.2882	no	no
ENSRNOG00000005257	104.708	19	16	16.5641	no	no
ENSRNOG00000040092	216.47	12	0	0	no	yes
ENSRNOG00000001291	71.7786	12	10	10.1968	no	no
ENSRNOG00000001316	98.1553	12	36	35.9694	no	no
ENSRNOG00000021540	63.65	10	48	48.3477	no	no
ENSRNOG00000014761	37.8619	19	10	10.9472	no	no
ENSRNOG00000020277	209.901	10	76	76.3454	yes	yes
ENSRNOG00000018366	82.6954	9	28	27.2839	no	no
ENSRNOG00000017466	112.839	17	36	35.1998	no	no
ENSRNOG00000014633	80.2579	7	82	82.2633	no	no
ENSRNOG00000012329	120.987	16	36	35.4069	no	no
ENSRNOG00000036729	269.53	10	94	93.557	yes	yes
ENSRNOG00000017510	182.921	1	88	88.3854	no	yes
ENSRNOG00000043436	898.15	20	20	19.118	no	yes
ENSRNOG00000017829	147.932	5	114	114.656	no	no
ENSRNOG00000010889	69.2186	2	90	90.0521	no	no
ENSRNOG00000015257	75.8857	8	48	48.9684	no	no
ENSRNOG00000003226	70.2246	10	42	41.9021	no	no
ENSRNOG00000019070	40.9094	7	88	87.2055	no	no
ENSRNOG00000011302	218.344	8	50	50.1226	no	yes
ENSRNOG00000018778	46.4291	8	42	41.247	no	no
ENSRNOG00000014637	95.4586	7	90	90.8233	no	no
ENSRNOG00000018960	52.7565	1	34	34.884	no	no
ENSRNOG00000033688	56.5579	6	94	93.7483	yes	no
ENSRNOG00000028498	377.279	14	50	49.3651	no	yes
ENSRNOG00000002636	114.109	10	2	2.5554	yes	no
ENSRNOG00000000638	172.455	20	14	13.8587	no	yes
ENSRNOG00000002051	65.1593	11	18	18.3134	no	no
ENSRNOG00000002141	42.4664	11	38	38.3623	no	no
ENSRNOG00000018281	36.1242	17	20	20.9125	no	no
ENSRNOG00000029441	60.4984	16	16	16.6986	no	no
ENSRNOG00000007731	98.4148	10	50	49.6168	no	no
ENSRNOG00000019568	95.7957	16	12	12.2972	no	no
ENSRNOG00000000129	267.457	5	38	38.0549	no	yes
ENSRNOG00000001239	221.369	20	4	3.92658	no	yes
ENSRNOG00000033465	36.861	1	100	100.403	no	no
ENSRNOG00000017781	240.266	10	76	75.5544	yes	yes
ENSRNOG00000010793	362.212	7	106	106.453	no	yes
ENSRNOG00000004763	445.078	3	74	73.886	no	yes
ENSRNOG00000020495	780.038	1	56	56.3354	yes	yes
ENSRNOG00000005457	186.676	3	78	78.5135	no	yes
ENSRNOG00000021685	133.77	10	58	57.8514	no	yes
ENSRNOG00000016410	184.53	17	0	0	no	yes
ENSRNOG00000002928	292.347	10	42	41.5576	no	yes
ENSRNOG00000009094	249.197	7	14	14.5387	no	yes
ENSRNOG00000038372	35.67	13	42	42.9943	no	no
ENSRNOG00000026646	489.75	5	84	84.6674	no	yes
ENSRNOG00000005003	160.218	6	94	95.67	yes	no
ENSRNOG00000013825	54.6957	5	98	97.7631	no	no
ENSRNOG00000014410	45.1413	8	68	68.0221	yes	no
ENSRNOG00000020698	43.0077	10	76	76.6943	yes	no
ENSRNOG00000015461	36.0664	9	62	61.3289	no	no
ENSRNOG00000003177	294.954	10	24	23.2257	yes	yes
ENSRNOG00000008615	62.6675	7	66	65.4262	no	no
ENSRNOG00000006237	86.5426	13	14	14.2941	no	no
ENSRNOG00000002886	80.8811	10	48	47.9497	no	no
ENSRNOG00000020748	260.851	8	88	88.5854	yes	yes
ENSRNOG00000025481	36.2167	7	54	53.0174	no	no
ENSRNOG00000019534	77.1882	1	124	124.936	no	no
ENSRNOG00000009276	182.238	2	84	83.08	no	yes
ENSRNOG00000003256	878.647	10	24	23.3094	yes	yes
ENSRNOG00000015182	36.0234	16	36	36.5036	no	no
ENSRNOG00000009298	899.779	5	106	106.969	no	yes
ENSRNOG00000020255	169.055	2	100	100.928	no	yes
ENSRNOG00000000939	440.73	12	0	0	no	yes
ENSRNOG00000034242	35.1034	5	38	38.0891	no	no
ENSRNOG00000017295	172.846	3	6	5.15755	no	yes
ENSRNOG00000018798	241.6	2	92	91.1766	no	yes
ENSRNOG00000024852	616.565	3	78	77.4755	no	yes
ENSRNOG00000012273	37.805	15	30	30.4531	no	no
ENSRNOG00000000541	200.512	20	0	0	no	yes
ENSRNOG00000032871	208.339	7	94	94.6253	no	yes
ENSRNOG00000025810	40.1322	4	94	93.1526	yes	no
ENSRNOG00000016343	134.716	1	104	104.175	no	no
ENSRNOG00000019560	76.8149	1	100	99.2115	no	no
ENSRNOG00000013061	153.087	16	32	31.0113	no	yes
ENSRNOG00000018343	690.895	17	0	0	no	yes
ENSRNOG00000018184	145.424	8	52	51.2994	no	no
ENSRNOG00000002642	992.544	7	0	0	no	yes
ENSRNOG00000010124	200.067	2	90	89.7943	no	yes
ENSRNOG00000014330	48.4317	1	0	0	no	no
ENSRNOG00000020102	334.072	1	56	56.2538	yes	yes
ENSRNOG00000017243	76.4809	1	122	122.922	no	no
ENSRNOG00000013783	57.7843	5	102	102.281	no	no
ENSRNOG00000021125	42.5987	1	130	130.031	no	no
ENSRNOG00000002896	145.486	13	36	35.963	no	no
ENSRNOG00000004089	208.667	7	66	65.6605	no	yes
ENSRNOG00000002079	87.1562	14	4	4.83096	no	no
ENSRNOG00000015843	55.7557	19	16	15.3365	no	no
ENSRNOG00000036802	996.486	3	100	99.7597	no	no
ENSRNOG00000036812	1080.05	3	98	98.3513	no	yes
ENSRNOG00000011489	490.85	7	2	1.913	no	yes
ENSRNOG00000017174	286.197	1	42	41.3521	yes	yes
ENSRNOG00000018680	998.264	18	50	50.429	no	no
ENSRNOG00000010277	136.593	8	44	44.7976	no	no
ENSRNOG00000010784	47.2558	8	58	57.0306	no	no
ENSRNOG00000022216	85.5984	10	58	57.0667	no	no
ENSRNOG00000017737	313.443	3	56	56.9335	no	yes
ENSRNOG00000015733	50.1311	9	84	84.9542	no	no
ENSRNOG00000003198	48.4938	10	0	0	no	no
ENSRNOG00000000841	45.8184	20	0	0	no	no
ENSRNOG00000016991	53.4596	19	8	8.37186	no	no
ENSRNOG00000027839	90.9762	15	30	29.3645	no	no
ENSRNOG00000029726	332.99	2	100	100.719	no	yes
ENSRNOG00000016863	37.8026	1	54	53.7437	yes	no
ENSRNOG00000009683	139.997	5	10	9.05914	no	yes
ENSRNOG00000018569	38.0963	2	100	100.546	no	no
ENSRNOG00000009066	145.006	10	74	73.1411	no	no
ENSRNOG00000019629	357.596	16	58	57.0564	no	yes
ENSRNOG00000033508	167.329	10	50	49.2591	no	yes
ENSRNOG00000006532	40.3374	10	94	95.3	yes	no
ENSRNOG00000000547	71.7159	20	32	31.807	no	no
ENSRNOG00000008937	106.446	13	14	14.9235	no	no
ENSRNOG00000004245	126.793	13	40	40.0549	no	no
ENSRNOG00000004680	48.4918	3	24	23.8961	yes	no
ENSRNOG00000004526	292.532	6	4	4.29327	no	no
ENSRNOG00000016043	58.1135	18	4	3.85501	no	no
ENSRNOG00000013961	75.7797	16	8	8.52145	no	no
ENSRNOG00000019578	2847.55	1	56	56.0848	yes	yes
ENSRNOG00000028404	603.397	10	72	72.6521	no	yes
ENSRNOG00000016163	171.634	2	42	41.1036	no	yes
ENSRNOG00000012247	35.098	4	68	67.2375	yes	no
ENSRNOG00000010555	74.9137	15	30	30.4272	no	no
ENSRNOG00000016474	189.527	8	46	45.589	no	yes
ENSRNOG00000017496	87.9689	10	76	75.5272	yes	no
ENSRNOG00000021269	70.4723	3	76	76.1189	no	no
ENSRNOG00000010263	201.427	2	64	64.6894	no	yes
ENSRNOG00000017895	224.775	5	110	109.231	no	yes
ENSRNOG00000018526	582.59	10	48	48.8213	no	yes
ENSRNOG00000033765	122.343	10	76	75.2082	yes	no
ENSRNOG00000009080	164.474	6	62	61.603	no	yes
ENSRNOG00000022248	43.7042	10	10	9.21045	yes	no
ENSRNOG00000013658	46.8598	15	30	29.8785	no	no
ENSRNOG00000016000	49.6616	2	100	99.5458	no	no
ENSRNOG00000015290	37.0442	4	94	93.1983	yes	no
ENSRNOG00000000527	87.5902	20	0	0	no	no
ENSRNOG00000003147	1969.74	10	36	35.2108	yes	yes
ENSRNOG00000016638	231.182	5	114	114.433	no	yes
ENSRNOG00000015849	60.43	2	36	35.2233	no	no
ENSRNOG00000009198	89.6699	8	84	83.7783	yes	no
ENSRNOG00000003905	604.274	10	80	79.7342	yes	yes
ENSRNOG00000030625	158.92	8	84	83.833	yes	no
ENSRNOG00000004741	1365.38	10	72	72.3114	no	yes
ENSRNOG00000001049	472.742	15	32	31.9757	no	yes
ENSRNOG00000017032	40.3319	18	52	52.28	no	no
ENSRNOG00000017939	35.9158	3	48	47.166	yes	no
ENSRNOG00000020451	42.9295	1	126	125.953	no	no
ENSRNOG00000020650	172.757	1	64	64.8171	no	yes
ENSRNOG00000008103	144.921	14	72	73.184	no	no
ENSRNOG00000013657	143.895	3	116	117.933	no	no
ENSRNOG00000018700	408.021	8	96	96.67	yes	yes
ENSRNOG00000015976	726.607	1	74	74.4236	no	yes
ENSRNOG00000001295	61.9916	20	2	2.73779	no	no
ENSRNOG00000016460	79.2331	15	30	29.1913	no	no
ENSRNOG00000004794	91.5163	6	58	58.1578	no	no
ENSRNOG00000015093	1012.4	14	4	4.06879	no	yes
ENSRNOG00000016770	107.133	1	54	53.7372	yes	no
ENSRNOG00000005195	160.826	3	90	90.0194	no	no
