# Supplementary material for: Genetic Influences on Brain Gene Expression in Rats Selected for Tameness and Aggression
Source: Oxford University Press journal article supplement (doi:10.1534/genetics.114.168948), 2014-09-03
Supplement: tables6.xlsx [file tables6.xlsx]

## Sheet: read.me
Table	Content
Table S3A	Genes grouped into 54 co-expression clusters
Table S3B	FIA cluster QTL that reached a FIA mapping score greater than 50
Table S3C	Clusters significantly correlating with tameness
Table S3D	Enrichment DAVID
Table S3E	Enrichment GO
Table S3F	Enrichment TFBS

## Sheet: S3A
Ensembl_gene_ID	Cluster
ENSRNOG00000017801	bisque4
ENSRNOG00000018816	bisque4
ENSRNOG00000010452	bisque4
ENSRNOG00000022860	bisque4
ENSRNOG00000028273	bisque4
ENSRNOG00000029825	bisque4
ENSRNOG00000017829	bisque4
ENSRNOG00000026267	bisque4
ENSRNOG00000022273	bisque4
ENSRNOG00000019214	bisque4
ENSRNOG00000033030	bisque4
ENSRNOG00000017172	bisque4
ENSRNOG00000014208	bisque4
ENSRNOG00000016813	bisque4
ENSRNOG00000019949	bisque4
ENSRNOG00000004826	bisque4
ENSRNOG00000018554	bisque4
ENSRNOG00000015385	bisque4
ENSRNOG00000013248	bisque4
ENSRNOG00000002491	bisque4
ENSRNOG00000026813	bisque4
ENSRNOG00000019257	bisque4
ENSRNOG00000012724	bisque4
ENSRNOG00000012558	bisque4
ENSRNOG00000021413	bisque4
ENSRNOG00000032948	bisque4
ENSRNOG00000012748	bisque4
ENSRNOG00000010358	bisque4
ENSRNOG00000042211	bisque4
ENSRNOG00000017372	bisque4
ENSRNOG00000008319	bisque4
ENSRNOG00000023226	bisque4
ENSRNOG00000018850	bisque4
ENSRNOG00000017346	bisque4
ENSRNOG00000010942	bisque4
ENSRNOG00000000417	bisque4
ENSRNOG00000011954	bisque4
ENSRNOG00000011072	bisque4
ENSRNOG00000019974	black
ENSRNOG00000006542	black
ENSRNOG00000002721	black
ENSRNOG00000017127	black
ENSRNOG00000006423	black
ENSRNOG00000011265	black
ENSRNOG00000001837	black
ENSRNOG00000017123	black
ENSRNOG00000005517	black
ENSRNOG00000030700	black
ENSRNOG00000002205	black
ENSRNOG00000006589	black
ENSRNOG00000007233	black
ENSRNOG00000009768	black
ENSRNOG00000031889	black
ENSRNOG00000011138	black
ENSRNOG00000019655	black
ENSRNOG00000028411	black
ENSRNOG00000029570	black
ENSRNOG00000016271	black
ENSRNOG00000021132	black
ENSRNOG00000008140	black
ENSRNOG00000018795	black
ENSRNOG00000018568	black
ENSRNOG00000001070	black
ENSRNOG00000000841	black
ENSRNOG00000023901	black
ENSRNOG00000006086	black
ENSRNOG00000008994	black
ENSRNOG00000012812	black
ENSRNOG00000013505	black
ENSRNOG00000001201	black
ENSRNOG00000000996	black
ENSRNOG00000012623	black
ENSRNOG00000016596	black
ENSRNOG00000033299	black
ENSRNOG00000022980	black
ENSRNOG00000009722	black
ENSRNOG00000014135	black
ENSRNOG00000003065	black
ENSRNOG00000001820	black
ENSRNOG00000019201	black
ENSRNOG00000009439	black
ENSRNOG00000039298	black
ENSRNOG00000000774	black
ENSRNOG00000042740	black
ENSRNOG00000018416	black
ENSRNOG00000039850	black
ENSRNOG00000015630	black
ENSRNOG00000016911	black
ENSRNOG00000025892	black
ENSRNOG00000025602	black
ENSRNOG00000011227	black
ENSRNOG00000013971	black
ENSRNOG00000026942	black
ENSRNOG00000024874	black
ENSRNOG00000039369	black
ENSRNOG00000030055	black
ENSRNOG00000001057	black
ENSRNOG00000004052	black
ENSRNOG00000013510	black
ENSRNOG00000021231	black
ENSRNOG00000039011	black
ENSRNOG00000014779	black
ENSRNOG00000018123	black
ENSRNOG00000034182	black
ENSRNOG00000024482	black
ENSRNOG00000042949	black
ENSRNOG00000000340	black
ENSRNOG00000016655	black
ENSRNOG00000000481	black
ENSRNOG00000024472	black
ENSRNOG00000005710	black
ENSRNOG00000029294	black
ENSRNOG00000019973	black
ENSRNOG00000009778	black
ENSRNOG00000001862	black
ENSRNOG00000008566	black
ENSRNOG00000024568	black
ENSRNOG00000018129	black
ENSRNOG00000000815	black
ENSRNOG00000003243	black
ENSRNOG00000019350	black
ENSRNOG00000033916	black
ENSRNOG00000016460	black
ENSRNOG00000008961	black
ENSRNOG00000027368	black
ENSRNOG00000019048	black
ENSRNOG00000000891	black
ENSRNOG00000009980	black
ENSRNOG00000026193	black
ENSRNOG00000013183	black
ENSRNOG00000016701	black
ENSRNOG00000039530	black
ENSRNOG00000024677	black
ENSRNOG00000004252	black
ENSRNOG00000004742	black
ENSRNOG00000019776	black
ENSRNOG00000017201	black
ENSRNOG00000012514	black
ENSRNOG00000020304	black
ENSRNOG00000033399	black
ENSRNOG00000006991	black
ENSRNOG00000019725	black
ENSRNOG00000012716	black
ENSRNOG00000032943	black
ENSRNOG00000002321	black
ENSRNOG00000023782	black
ENSRNOG00000032740	black
ENSRNOG00000018784	black
ENSRNOG00000015393	black
ENSRNOG00000001124	black
ENSRNOG00000002730	black
ENSRNOG00000011956	black
ENSRNOG00000004773	black
ENSRNOG00000009280	black
ENSRNOG00000039285	black
ENSRNOG00000021170	black
ENSRNOG00000011189	black
ENSRNOG00000013572	black
ENSRNOG00000018109	black
ENSRNOG00000019397	black
ENSRNOG00000042160	black
ENSRNOG00000004006	black
ENSRNOG00000036665	black
ENSRNOG00000030557	black
ENSRNOG00000013927	black
ENSRNOG00000012863	black
ENSRNOG00000030206	black
ENSRNOG00000009078	black
ENSRNOG00000016138	black
ENSRNOG00000013658	black
ENSRNOG00000019507	black
ENSRNOG00000010728	black
ENSRNOG00000003338	black
ENSRNOG00000023351	black
ENSRNOG00000001055	black
ENSRNOG00000032544	black
ENSRNOG00000004697	black
ENSRNOG00000027944	black
ENSRNOG00000006556	black
ENSRNOG00000030750	black
ENSRNOG00000016807	black
ENSRNOG00000000926	black
ENSRNOG00000005344	black
ENSRNOG00000002352	black
ENSRNOG00000002949	black
ENSRNOG00000026481	black
ENSRNOG00000031485	black
ENSRNOG00000031965	black
ENSRNOG00000042853	black
ENSRNOG00000004199	black
ENSRNOG00000013975	black
ENSRNOG00000025539	black
ENSRNOG00000018457	black
ENSRNOG00000009495	black
ENSRNOG00000000786	black
ENSRNOG00000010116	black
ENSRNOG00000009075	black
ENSRNOG00000010552	black
ENSRNOG00000027959	black
ENSRNOG00000011276	black
ENSRNOG00000027439	black
ENSRNOG00000003494	black
ENSRNOG00000016592	black
ENSRNOG00000012690	black
ENSRNOG00000037909	black
ENSRNOG00000003146	black
ENSRNOG00000037673	black
ENSRNOG00000001142	black
ENSRNOG00000017745	black
ENSRNOG00000005924	black
ENSRNOG00000000304	black
ENSRNOG00000031746	black
ENSRNOG00000042239	black
ENSRNOG00000004419	black
ENSRNOG00000011675	black
ENSRNOG00000000575	black
ENSRNOG00000007379	black
ENSRNOG00000004027	black
ENSRNOG00000008984	black
ENSRNOG00000042988	black
ENSRNOG00000011627	black
ENSRNOG00000012085	black
ENSRNOG00000030024	black
ENSRNOG00000017069	black
ENSRNOG00000008052	black
ENSRNOG00000024241	black
ENSRNOG00000039608	black
ENSRNOG00000028688	black
ENSRNOG00000017045	black
ENSRNOG00000009255	black
ENSRNOG00000020554	black
ENSRNOG00000020495	black
ENSRNOG00000000460	black
ENSRNOG00000036954	black
ENSRNOG00000020339	black
ENSRNOG00000024309	black
ENSRNOG00000001396	black
ENSRNOG00000019219	black
ENSRNOG00000030520	black
ENSRNOG00000038489	black
ENSRNOG00000012184	black
ENSRNOG00000006400	black
ENSRNOG00000016031	black
ENSRNOG00000043123	black
ENSRNOG00000000799	black
ENSRNOG00000025764	black
ENSRNOG00000018639	black
ENSRNOG00000011912	black
ENSRNOG00000020348	black
ENSRNOG00000020929	black
ENSRNOG00000005450	black
ENSRNOG00000013504	black
ENSRNOG00000022414	black
ENSRNOG00000011855	black
ENSRNOG00000017020	black
ENSRNOG00000012961	black
ENSRNOG00000024945	black
ENSRNOG00000019306	black
ENSRNOG00000018549	black
ENSRNOG00000003308	black
ENSRNOG00000022431	black
ENSRNOG00000008625	black
ENSRNOG00000019698	black
ENSRNOG00000023622	black
ENSRNOG00000017916	black
ENSRNOG00000042728	black
ENSRNOG00000006670	black
ENSRNOG00000000146	black
ENSRNOG00000007272	black
ENSRNOG00000004737	black
ENSRNOG00000019701	black
ENSRNOG00000023042	black
ENSRNOG00000012357	black
ENSRNOG00000000639	black
ENSRNOG00000022430	black
ENSRNOG00000010482	black
ENSRNOG00000019985	black
ENSRNOG00000008816	black
ENSRNOG00000009373	black
ENSRNOG00000001785	black
ENSRNOG00000014639	black
ENSRNOG00000030963	blue
ENSRNOG00000020449	blue
ENSRNOG00000033711	blue
ENSRNOG00000009811	blue
ENSRNOG00000005184	blue
ENSRNOG00000011222	blue
ENSRNOG00000005389	blue
ENSRNOG00000021808	blue
ENSRNOG00000004973	blue
ENSRNOG00000015733	blue
ENSRNOG00000001920	blue
ENSRNOG00000000840	blue
ENSRNOG00000009029	blue
ENSRNOG00000010284	blue
ENSRNOG00000014415	blue
ENSRNOG00000042652	blue
ENSRNOG00000003229	blue
ENSRNOG00000009038	blue
ENSRNOG00000042930	blue
ENSRNOG00000010353	blue
ENSRNOG00000000274	blue
ENSRNOG00000007442	blue
ENSRNOG00000019433	blue
ENSRNOG00000002029	blue
ENSRNOG00000007312	blue
ENSRNOG00000040246	blue
ENSRNOG00000001436	blue
ENSRNOG00000004794	blue
ENSRNOG00000015202	blue
ENSRNOG00000009733	blue
ENSRNOG00000025715	blue
ENSRNOG00000001494	blue
ENSRNOG00000028958	blue
ENSRNOG00000005326	blue
ENSRNOG00000023150	blue
ENSRNOG00000019570	blue
ENSRNOG00000015544	blue
ENSRNOG00000032350	blue
ENSRNOG00000020914	blue
ENSRNOG00000005512	blue
ENSRNOG00000005028	blue
ENSRNOG00000013381	blue
ENSRNOG00000026410	blue
ENSRNOG00000028543	blue
ENSRNOG00000006604	blue
ENSRNOG00000030591	blue
ENSRNOG00000016300	blue
ENSRNOG00000016054	blue
ENSRNOG00000042643	blue
ENSRNOG00000018630	blue
ENSRNOG00000014399	blue
ENSRNOG00000021254	blue
ENSRNOG00000011955	blue
ENSRNOG00000016912	blue
ENSRNOG00000017895	blue
ENSRNOG00000007971	blue
ENSRNOG00000003747	blue
ENSRNOG00000026991	blue
ENSRNOG00000003223	blue
ENSRNOG00000020584	blue
ENSRNOG00000027761	blue
ENSRNOG00000014690	blue
ENSRNOG00000001274	blue
ENSRNOG00000004863	blue
ENSRNOG00000003078	blue
ENSRNOG00000016810	blue
ENSRNOG00000016000	blue
ENSRNOG00000009205	blue
ENSRNOG00000005345	blue
ENSRNOG00000007049	blue
ENSRNOG00000019223	blue
ENSRNOG00000027049	blue
ENSRNOG00000014157	blue
ENSRNOG00000001815	blue
ENSRNOG00000024320	blue
ENSRNOG00000010331	blue
ENSRNOG00000016001	blue
ENSRNOG00000034075	blue
ENSRNOG00000003846	blue
ENSRNOG00000016338	blue
ENSRNOG00000038059	blue
ENSRNOG00000005596	blue
ENSRNOG00000034234	blue
ENSRNOG00000029152	blue
ENSRNOG00000033172	blue
ENSRNOG00000007091	blue
ENSRNOG00000004904	blue
ENSRNOG00000023781	blue
ENSRNOG00000033035	blue
ENSRNOG00000038858	blue
ENSRNOG00000003758	blue
ENSRNOG00000002827	blue
ENSRNOG00000010945	blue
ENSRNOG00000016474	blue
ENSRNOG00000000875	blue
ENSRNOG00000017279	blue
ENSRNOG00000019961	blue
ENSRNOG00000020431	blue
ENSRNOG00000010960	blue
ENSRNOG00000015708	blue
ENSRNOG00000042406	blue
ENSRNOG00000019485	blue
ENSRNOG00000022724	blue
ENSRNOG00000009063	blue
ENSRNOG00000002388	blue
ENSRNOG00000004621	blue
ENSRNOG00000013386	blue
ENSRNOG00000020113	blue
ENSRNOG00000030347	blue
ENSRNOG00000009566	blue
ENSRNOG00000003355	blue
ENSRNOG00000043128	blue
ENSRNOG00000022432	blue
ENSRNOG00000016137	blue
ENSRNOG00000019321	blue
ENSRNOG00000009531	blue
ENSRNOG00000030950	blue
ENSRNOG00000002335	blue
ENSRNOG00000007434	blue
ENSRNOG00000008193	blue
ENSRNOG00000005261	blue
ENSRNOG00000031092	blue
ENSRNOG00000001811	blue
ENSRNOG00000024567	blue
ENSRNOG00000014611	blue
ENSRNOG00000012329	blue
ENSRNOG00000010774	blue
ENSRNOG00000020771	blue
ENSRNOG00000027849	blue
ENSRNOG00000022267	blue
ENSRNOG00000042271	blue
ENSRNOG00000019205	blue
ENSRNOG00000004711	blue
ENSRNOG00000011468	blue
ENSRNOG00000029030	blue
ENSRNOG00000000463	blue
ENSRNOG00000027015	blue
ENSRNOG00000014573	blue
ENSRNOG00000011463	blue
ENSRNOG00000002838	blue
ENSRNOG00000018208	blue
ENSRNOG00000001911	blue
ENSRNOG00000027088	blue
ENSRNOG00000038883	blue
ENSRNOG00000012601	blue
ENSRNOG00000004268	blue
ENSRNOG00000009206	blue
ENSRNOG00000030056	blue
ENSRNOG00000019028	blue
ENSRNOG00000029709	blue
ENSRNOG00000000812	blue
ENSRNOG00000018048	blue
ENSRNOG00000018870	blue
ENSRNOG00000031475	blue
ENSRNOG00000011864	blue
ENSRNOG00000029470	blue
ENSRNOG00000037244	blue
ENSRNOG00000042744	blue
ENSRNOG00000011639	blue
ENSRNOG00000018718	blue
ENSRNOG00000008098	blue
ENSRNOG00000013741	blue
ENSRNOG00000010502	blue
ENSRNOG00000001351	blue
ENSRNOG00000006001	blue
ENSRNOG00000004430	blue
ENSRNOG00000017219	blue
ENSRNOG00000017795	blue
ENSRNOG00000013919	blue
ENSRNOG00000005306	blue
ENSRNOG00000010230	blue
ENSRNOG00000004172	blue
ENSRNOG00000000809	blue
ENSRNOG00000015969	blue
ENSRNOG00000005452	blue
ENSRNOG00000016849	blue
ENSRNOG00000023389	blue
ENSRNOG00000013536	blue
ENSRNOG00000005402	blue
ENSRNOG00000001072	blue
ENSRNOG00000003125	blue
ENSRNOG00000001783	blue
ENSRNOG00000009266	blue
ENSRNOG00000042916	blue
ENSRNOG00000018301	blue
ENSRNOG00000033281	blue
ENSRNOG00000006700	blue
ENSRNOG00000008897	blue
ENSRNOG00000002553	blue
ENSRNOG00000011302	blue
ENSRNOG00000014806	blue
ENSRNOG00000037402	blue
ENSRNOG00000030127	blue
ENSRNOG00000029269	blue
ENSRNOG00000018796	blue
ENSRNOG00000008703	blue
ENSRNOG00000030091	blue
ENSRNOG00000038478	blue
ENSRNOG00000000918	blue
ENSRNOG00000020644	blue
ENSRNOG00000030314	blue
ENSRNOG00000038973	blue
ENSRNOG00000002454	blue
ENSRNOG00000007183	blue
ENSRNOG00000031038	blue
ENSRNOG00000000062	blue
ENSRNOG00000018456	blue
ENSRNOG00000000314	blue
ENSRNOG00000003670	blue
ENSRNOG00000014154	blue
ENSRNOG00000008116	blue
ENSRNOG00000004751	blue
ENSRNOG00000001044	blue
ENSRNOG00000012193	blue
ENSRNOG00000017907	blue
ENSRNOG00000003315	blue
ENSRNOG00000018481	blue
ENSRNOG00000036701	blue
ENSRNOG00000001843	blue
ENSRNOG00000022455	blue
ENSRNOG00000000585	blue
ENSRNOG00000002055	blue
ENSRNOG00000020250	blue
ENSRNOG00000013111	blue
ENSRNOG00000010993	blue
ENSRNOG00000012457	blue
ENSRNOG00000026716	blue
ENSRNOG00000012771	blue
ENSRNOG00000005024	blue
ENSRNOG00000001094	blue
ENSRNOG00000011882	blue
ENSRNOG00000001345	blue
ENSRNOG00000002579	blue
ENSRNOG00000004139	blue
ENSRNOG00000024796	blue
ENSRNOG00000042492	blue
ENSRNOG00000001313	blue
ENSRNOG00000001276	blue
ENSRNOG00000039252	blue
ENSRNOG00000042068	blue
ENSRNOG00000013533	blue
ENSRNOG00000013042	blue
ENSRNOG00000004846	blue
ENSRNOG00000003611	blue
ENSRNOG00000000558	blue
ENSRNOG00000009745	blue
ENSRNOG00000016562	blue
ENSRNOG00000016390	blue
ENSRNOG00000007203	blue
ENSRNOG00000034177	blue
ENSRNOG00000009309	blue
ENSRNOG00000025891	blue
ENSRNOG00000022006	blue
ENSRNOG00000018628	blue
ENSRNOG00000003594	blue
ENSRNOG00000002456	blue
ENSRNOG00000003779	blue
ENSRNOG00000009729	blue
ENSRNOG00000018945	blue
ENSRNOG00000006471	blue
ENSRNOG00000010164	blue
ENSRNOG00000013128	blue
ENSRNOG00000016549	blue
ENSRNOG00000032705	blue
ENSRNOG00000005601	blue
ENSRNOG00000036934	blue
ENSRNOG00000001410	blue
ENSRNOG00000025003	blue
ENSRNOG00000024022	blue
ENSRNOG00000036577	blue
ENSRNOG00000019464	blue
ENSRNOG00000025383	blue
ENSRNOG00000018851	blue
ENSRNOG00000008725	blue
ENSRNOG00000012815	blue
ENSRNOG00000024247	blue
ENSRNOG00000002240	blue
ENSRNOG00000042906	blue
ENSRNOG00000030476	blue
ENSRNOG00000002884	blue
ENSRNOG00000013452	blue
ENSRNOG00000032765	blue
ENSRNOG00000004492	blue
ENSRNOG00000025269	blue
ENSRNOG00000020255	blue
ENSRNOG00000009236	blue
ENSRNOG00000037695	blue
ENSRNOG00000011725	blue
ENSRNOG00000017029	blue
ENSRNOG00000023458	blue
ENSRNOG00000012786	blue
ENSRNOG00000004322	blue
ENSRNOG00000030074	blue
ENSRNOG00000020492	blue
ENSRNOG00000010170	blue
ENSRNOG00000007793	blue
ENSRNOG00000016619	blue
ENSRNOG00000021091	blue
ENSRNOG00000011105	blue
ENSRNOG00000000845	blue
ENSRNOG00000020451	blue
ENSRNOG00000037187	blue
ENSRNOG00000028594	blue
ENSRNOG00000012476	blue
ENSRNOG00000013708	blue
ENSRNOG00000043107	blue
ENSRNOG00000008482	blue
ENSRNOG00000009290	blue
ENSRNOG00000010839	blue
ENSRNOG00000029813	blue
ENSRNOG00000011993	blue
ENSRNOG00000001256	blue
ENSRNOG00000023381	blue
ENSRNOG00000021273	blue
ENSRNOG00000006984	blue
ENSRNOG00000027514	blue
ENSRNOG00000009057	blue
ENSRNOG00000007661	blue
ENSRNOG00000014128	blue
ENSRNOG00000042523	blue
ENSRNOG00000043119	blue
ENSRNOG00000010021	blue
ENSRNOG00000016281	blue
ENSRNOG00000002737	blue
ENSRNOG00000016416	blue
ENSRNOG00000027006	blue
ENSRNOG00000013454	blue
ENSRNOG00000018603	blue
ENSRNOG00000009372	blue
ENSRNOG00000022323	blue
ENSRNOG00000032034	blue
ENSRNOG00000009085	blue
ENSRNOG00000036684	blue
ENSRNOG00000043144	blue
ENSRNOG00000001145	blue
ENSRNOG00000006184	blue
ENSRNOG00000001404	blue
ENSRNOG00000004083	blue
ENSRNOG00000030312	blue
ENSRNOG00000021847	blue
ENSRNOG00000028062	blue
ENSRNOG00000020878	blue
ENSRNOG00000038616	blue
ENSRNOG00000001748	blue
ENSRNOG00000042482	blue
ENSRNOG00000014668	blue
ENSRNOG00000014061	blue
ENSRNOG00000037505	blue
ENSRNOG00000000847	blue
ENSRNOG00000016897	blue
ENSRNOG00000016957	blue
ENSRNOG00000015625	blue
ENSRNOG00000012677	blue
ENSRNOG00000001742	blue
ENSRNOG00000014604	blue
ENSRNOG00000020201	blue
ENSRNOG00000023923	blue
ENSRNOG00000009437	blue
ENSRNOG00000013202	blue
ENSRNOG00000029584	blue
ENSRNOG00000018536	blue
ENSRNOG00000018440	blue
ENSRNOG00000016486	blue
ENSRNOG00000039017	blue
ENSRNOG00000029447	blue
ENSRNOG00000029735	blue
ENSRNOG00000004911	blue
ENSRNOG00000000432	blue
ENSRNOG00000004919	blue
ENSRNOG00000021232	blue
ENSRNOG00000002934	blue
ENSRNOG00000033346	blue
ENSRNOG00000031709	blue
ENSRNOG00000002536	blue
ENSRNOG00000018746	blue
ENSRNOG00000015735	blue
ENSRNOG00000018972	blue
ENSRNOG00000001025	blue
ENSRNOG00000023540	blue
ENSRNOG00000014003	blue
ENSRNOG00000042540	blue
ENSRNOG00000012026	blue
ENSRNOG00000022501	blue
ENSRNOG00000004577	blue
ENSRNOG00000005615	blue
ENSRNOG00000001516	blue
ENSRNOG00000029855	blue
ENSRNOG00000005046	blue
ENSRNOG00000022234	blue
ENSRNOG00000011349	blue
ENSRNOG00000017744	blue
ENSRNOG00000028366	blue
ENSRNOG00000011911	blue
ENSRNOG00000005442	blue
ENSRNOG00000002748	blue
ENSRNOG00000003504	blue
ENSRNOG00000014564	blue
ENSRNOG00000009820	blue
ENSRNOG00000003714	blue
ENSRNOG00000010540	blue
ENSRNOG00000019325	blue
ENSRNOG00000025338	blue
ENSRNOG00000002273	blue
ENSRNOG00000005249	blue
ENSRNOG00000018399	blue
ENSRNOG00000009864	blue
ENSRNOG00000000885	blue
ENSRNOG00000032885	blue
ENSRNOG00000020333	blue
ENSRNOG00000010277	blue
ENSRNOG00000031802	blue
ENSRNOG00000017923	blue
ENSRNOG00000013380	blue
ENSRNOG00000020525	blue
ENSRNOG00000008939	blue
ENSRNOG00000012439	blue
ENSRNOG00000029592	blue
ENSRNOG00000001041	blue
ENSRNOG00000013774	blue
ENSRNOG00000011448	blue
ENSRNOG00000042079	blue
ENSRNOG00000008103	blue
ENSRNOG00000031291	blue
ENSRNOG00000011573	blue
ENSRNOG00000025252	blue
ENSRNOG00000001034	blue
ENSRNOG00000017222	blue
ENSRNOG00000024230	blue
ENSRNOG00000033307	blue
ENSRNOG00000003864	blue
ENSRNOG00000013659	blue
ENSRNOG00000016422	blue
ENSRNOG00000011451	blue
ENSRNOG00000020385	blue
ENSRNOG00000014887	blue
ENSRNOG00000043480	blue
ENSRNOG00000007051	blue
ENSRNOG00000017471	blue
ENSRNOG00000020673	blue
ENSRNOG00000028629	blue
ENSRNOG00000038427	blue
ENSRNOG00000019113	blue
ENSRNOG00000019487	blue
ENSRNOG00000004844	blue
ENSRNOG00000015182	blue
ENSRNOG00000007732	blue
ENSRNOG00000033881	blue
ENSRNOG00000001312	blue
ENSRNOG00000014628	blue
ENSRNOG00000015280	blue
ENSRNOG00000007578	blue
ENSRNOG00000012785	blue
ENSRNOG00000024468	blue
ENSRNOG00000015095	blue
ENSRNOG00000016907	blue
ENSRNOG00000036745	blue
ENSRNOG00000008524	blue
ENSRNOG00000020500	blue
ENSRNOG00000013100	blue
ENSRNOG00000013545	blue
ENSRNOG00000012504	blue
ENSRNOG00000001391	blue
ENSRNOG00000010747	blue
ENSRNOG00000015143	blue
ENSRNOG00000003689	blue
ENSRNOG00000028341	blue
ENSRNOG00000003253	blue
ENSRNOG00000037253	blue
ENSRNOG00000025009	blue
ENSRNOG00000007001	blue
ENSRNOG00000017091	blue
ENSRNOG00000018812	blue
ENSRNOG00000013324	blue
ENSRNOG00000028584	blue
ENSRNOG00000019031	blue
ENSRNOG00000042502	blue
ENSRNOG00000042425	blue
ENSRNOG00000002210	blue
ENSRNOG00000016121	blue
ENSRNOG00000008001	blue
ENSRNOG00000019926	blue
ENSRNOG00000001222	blue
ENSRNOG00000024631	blue
ENSRNOG00000000275	blue
ENSRNOG00000001211	blue
ENSRNOG00000001845	blue
ENSRNOG00000014565	blue
ENSRNOG00000010695	blue
ENSRNOG00000004909	blue
ENSRNOG00000012991	blue
ENSRNOG00000011067	blue
ENSRNOG00000006813	blue
ENSRNOG00000007427	blue
ENSRNOG00000001844	blue
ENSRNOG00000009176	blue
ENSRNOG00000032364	blue
ENSRNOG00000003782	blue
ENSRNOG00000027032	blue
ENSRNOG00000019394	blue
ENSRNOG00000012736	blue
ENSRNOG00000011258	blue
ENSRNOG00000023816	blue
ENSRNOG00000024961	blue
ENSRNOG00000010080	blue
ENSRNOG00000020280	blue
ENSRNOG00000014429	blue
ENSRNOG00000024454	blue
ENSRNOG00000029866	blue
ENSRNOG00000028984	blue
ENSRNOG00000036874	blue
ENSRNOG00000007500	blue
ENSRNOG00000006800	blue
ENSRNOG00000022162	blue
ENSRNOG00000012534	blue
ENSRNOG00000010121	blue
ENSRNOG00000015777	blue
ENSRNOG00000027833	blue
ENSRNOG00000006792	blue
ENSRNOG00000043004	blue
ENSRNOG00000020497	blue
ENSRNOG00000001520	blue
ENSRNOG00000009845	blue
ENSRNOG00000023127	blue
ENSRNOG00000013446	blue
ENSRNOG00000007492	blue
ENSRNOG00000043105	blue
ENSRNOG00000005987	blue
ENSRNOG00000038297	blue
ENSRNOG00000038372	blue
ENSRNOG00000009548	blue
ENSRNOG00000023220	blue
ENSRNOG00000005923	blue
ENSRNOG00000010196	blue
ENSRNOG00000028403	blue
ENSRNOG00000008377	blue
ENSRNOG00000001258	blue
ENSRNOG00000043136	blue
ENSRNOG00000036676	blue
ENSRNOG00000012287	blue
ENSRNOG00000005625	blue
ENSRNOG00000018211	blue
ENSRNOG00000007859	blue
ENSRNOG00000020020	blue
ENSRNOG00000011684	blue
ENSRNOG00000018998	blue
ENSRNOG00000042213	blue
ENSRNOG00000042512	blue
ENSRNOG00000009512	blue
ENSRNOG00000012258	blue
ENSRNOG00000014886	blue
ENSRNOG00000015517	blue
ENSRNOG00000005247	blue
ENSRNOG00000011311	blue
ENSRNOG00000003554	blue
ENSRNOG00000043354	blue
ENSRNOG00000005015	blue
ENSRNOG00000012778	blue
ENSRNOG00000007031	brown
ENSRNOG00000008620	brown
ENSRNOG00000037476	brown
ENSRNOG00000006859	brown
ENSRNOG00000010488	brown
ENSRNOG00000022753	brown
ENSRNOG00000019181	brown
ENSRNOG00000015691	brown
ENSRNOG00000013436	brown
ENSRNOG00000024711	brown
ENSRNOG00000013140	brown
ENSRNOG00000009629	brown
ENSRNOG00000017114	brown
ENSRNOG00000006470	brown
ENSRNOG00000022386	brown
ENSRNOG00000003207	brown
ENSRNOG00000029931	brown
ENSRNOG00000014007	brown
ENSRNOG00000017496	brown
ENSRNOG00000004281	brown
ENSRNOG00000018198	brown
ENSRNOG00000007916	brown
ENSRNOG00000006056	brown
ENSRNOG00000015401	brown
ENSRNOG00000014723	brown
ENSRNOG00000019154	brown
ENSRNOG00000014320	brown
ENSRNOG00000007367	brown
ENSRNOG00000004084	brown
ENSRNOG00000014293	brown
ENSRNOG00000005371	brown
ENSRNOG00000016877	brown
ENSRNOG00000025324	brown
ENSRNOG00000002524	brown
ENSRNOG00000011803	brown
ENSRNOG00000000708	brown
ENSRNOG00000008659	brown
ENSRNOG00000021314	brown
ENSRNOG00000033883	brown
ENSRNOG00000007726	brown
ENSRNOG00000014971	brown
ENSRNOG00000007869	brown
ENSRNOG00000001006	brown
ENSRNOG00000014365	brown
ENSRNOG00000008517	brown
ENSRNOG00000015736	brown
ENSRNOG00000013154	brown
ENSRNOG00000006937	brown
ENSRNOG00000006403	brown
ENSRNOG00000007989	brown
ENSRNOG00000021472	brown
ENSRNOG00000016558	brown
ENSRNOG00000009935	brown
ENSRNOG00000019937	brown
ENSRNOG00000018237	brown
ENSRNOG00000028353	brown
ENSRNOG00000003289	brown
ENSRNOG00000036869	brown
ENSRNOG00000017489	brown
ENSRNOG00000010944	brown
ENSRNOG00000011431	brown
ENSRNOG00000010352	brown
ENSRNOG00000019018	brown
ENSRNOG00000019533	brown
ENSRNOG00000028844	brown
ENSRNOG00000017249	brown
ENSRNOG00000016841	brown
ENSRNOG00000033261	brown
ENSRNOG00000013515	brown
ENSRNOG00000017824	brown
ENSRNOG00000023643	brown
ENSRNOG00000024244	brown
ENSRNOG00000019388	brown
ENSRNOG00000025772	brown
ENSRNOG00000042855	brown
ENSRNOG00000017879	brown
ENSRNOG00000012818	brown
ENSRNOG00000007234	brown
ENSRNOG00000005209	brown
ENSRNOG00000015547	brown
ENSRNOG00000018836	brown
ENSRNOG00000020687	brown
ENSRNOG00000022764	brown
ENSRNOG00000003746	brown
ENSRNOG00000017575	brown
ENSRNOG00000003894	brown
ENSRNOG00000017290	brown
ENSRNOG00000029528	brown
ENSRNOG00000042224	brown
ENSRNOG00000008145	brown
ENSRNOG00000014060	brown
ENSRNOG00000024039	brown
ENSRNOG00000012371	brown
ENSRNOG00000001192	brown
ENSRNOG00000010574	brown
ENSRNOG00000009001	brown
ENSRNOG00000019005	brown
ENSRNOG00000013333	brown
ENSRNOG00000020393	brown
ENSRNOG00000004672	brown
ENSRNOG00000033663	brown
ENSRNOG00000001803	brown
ENSRNOG00000006255	brown
ENSRNOG00000014775	brown
ENSRNOG00000010799	brown
ENSRNOG00000002365	brown
ENSRNOG00000016737	brown
ENSRNOG00000018487	brown
ENSRNOG00000009681	brown
ENSRNOG00000002449	brown
ENSRNOG00000018452	brown
ENSRNOG00000014684	brown
ENSRNOG00000000999	brown
ENSRNOG00000027229	brown
ENSRNOG00000012710	brown
ENSRNOG00000021828	brown
ENSRNOG00000008190	brown
ENSRNOG00000031167	brown
ENSRNOG00000026447	brown
ENSRNOG00000033608	brown
ENSRNOG00000015105	brown
ENSRNOG00000032659	brown
ENSRNOG00000030888	brown
ENSRNOG00000011284	brown
ENSRNOG00000019140	brown
ENSRNOG00000031347	brown
ENSRNOG00000028426	brown
ENSRNOG00000007814	brown
ENSRNOG00000000569	brown
ENSRNOG00000002708	brown
ENSRNOG00000030625	brown
ENSRNOG00000022039	brown
ENSRNOG00000026742	brown
ENSRNOG00000000397	brown
ENSRNOG00000017125	brown
ENSRNOG00000012929	brown
ENSRNOG00000022784	brown
ENSRNOG00000024207	brown
ENSRNOG00000012782	brown
ENSRNOG00000026053	brown
ENSRNOG00000007364	brown
ENSRNOG00000001825	brown
ENSRNOG00000009276	brown
ENSRNOG00000003226	brown
ENSRNOG00000006226	brown
ENSRNOG00000039464	brown
ENSRNOG00000007596	brown
ENSRNOG00000028241	brown
ENSRNOG00000024712	brown
ENSRNOG00000001786	brown
ENSRNOG00000020875	brown
ENSRNOG00000012868	brown
ENSRNOG00000018242	brown
ENSRNOG00000009007	brown
ENSRNOG00000020893	brown
ENSRNOG00000032463	brown
ENSRNOG00000007474	brown
ENSRNOG00000011775	brown
ENSRNOG00000012311	brown
ENSRNOG00000020703	brown
ENSRNOG00000024549	brown
ENSRNOG00000009951	brown
ENSRNOG00000012852	brown
ENSRNOG00000018950	brown
ENSRNOG00000007345	brown
ENSRNOG00000020904	brown
ENSRNOG00000011262	brown
ENSRNOG00000042888	brown
ENSRNOG00000014161	brown
ENSRNOG00000022807	brown
ENSRNOG00000009592	brown
ENSRNOG00000009982	brown
ENSRNOG00000010282	brown
ENSRNOG00000004346	brown
ENSRNOG00000008915	brown
ENSRNOG00000015503	brown
ENSRNOG00000008637	brown
ENSRNOG00000024970	brown
ENSRNOG00000021732	brown
ENSRNOG00000007281	brown
ENSRNOG00000008761	brown
ENSRNOG00000020061	brown
ENSRNOG00000017731	brown
ENSRNOG00000001525	brown
ENSRNOG00000013656	brown
ENSRNOG00000006995	brown
ENSRNOG00000010031	brown
ENSRNOG00000000814	brown
ENSRNOG00000021138	brown
ENSRNOG00000004003	brown
ENSRNOG00000017087	brown
ENSRNOG00000009954	brown
ENSRNOG00000020918	brown
ENSRNOG00000021004	brown
ENSRNOG00000001478	brown
ENSRNOG00000007120	brown
ENSRNOG00000013654	brown
ENSRNOG00000017309	brown
ENSRNOG00000006505	brown
ENSRNOG00000011352	brown
ENSRNOG00000028090	brown
ENSRNOG00000014087	brown
ENSRNOG00000027903	brown
ENSRNOG00000010765	brown
ENSRNOG00000033051	brown
ENSRNOG00000031927	brown
ENSRNOG00000032152	brown
ENSRNOG00000002520	brown
ENSRNOG00000020570	brown
ENSRNOG00000020714	brown
ENSRNOG00000032703	brown
ENSRNOG00000002347	brown
ENSRNOG00000007036	brown
ENSRNOG00000016330	brown
ENSRNOG00000031930	brown
ENSRNOG00000004889	brown
ENSRNOG00000010330	brown
ENSRNOG00000011633	brown
ENSRNOG00000027940	brown
ENSRNOG00000018371	brown
ENSRNOG00000013064	brown
ENSRNOG00000000151	brown
ENSRNOG00000000830	brown
ENSRNOG00000008534	brown
ENSRNOG00000016204	brown
ENSRNOG00000031069	brown
ENSRNOG00000017890	brown
ENSRNOG00000027520	brown
ENSRNOG00000036604	brown
ENSRNOG00000037508	brown
ENSRNOG00000016795	brown
ENSRNOG00000006938	brown
ENSRNOG00000000536	brown
ENSRNOG00000029450	brown
ENSRNOG00000000605	brown
ENSRNOG00000017703	brown
ENSRNOG00000010453	brown
ENSRNOG00000022153	brown
ENSRNOG00000012206	brown
ENSRNOG00000030319	brown
ENSRNOG00000018808	brown
ENSRNOG00000007100	brown
ENSRNOG00000001733	brown
ENSRNOG00000042098	brown
ENSRNOG00000013196	brown
ENSRNOG00000019962	brown
ENSRNOG00000013552	brown
ENSRNOG00000014961	brown
ENSRNOG00000008174	brown
ENSRNOG00000022896	brown
ENSRNOG00000019404	brown
ENSRNOG00000020173	brown
ENSRNOG00000007992	brown
ENSRNOG00000005043	brown
ENSRNOG00000014241	brown
ENSRNOG00000007034	brown
ENSRNOG00000019861	brown
ENSRNOG00000008612	brown
ENSRNOG00000021298	brown
ENSRNOG00000016643	brown
ENSRNOG00000011305	brown
ENSRNOG00000018567	brown
ENSRNOG00000019831	brown
ENSRNOG00000000775	brown
ENSRNOG00000012406	brown
ENSRNOG00000007997	brown
ENSRNOG00000042812	brown
ENSRNOG00000009113	brown
ENSRNOG00000001253	brown
ENSRNOG00000001555	brown
ENSRNOG00000003098	brown
ENSRNOG00000032590	brown
ENSRNOG00000001329	brown
ENSRNOG00000029242	brown
ENSRNOG00000012019	brown
ENSRNOG00000020441	brown
ENSRNOG00000011195	brown
ENSRNOG00000039494	brown
ENSRNOG00000011527	brown
ENSRNOG00000011116	brown
ENSRNOG00000002262	brown
ENSRNOG00000011921	brown
ENSRNOG00000002089	brown
ENSRNOG00000017220	brown
ENSRNOG00000004132	brown
ENSRNOG00000001277	brown
ENSRNOG00000003442	brown
ENSRNOG00000021285	brown
ENSRNOG00000002724	brown
ENSRNOG00000016475	brown
ENSRNOG00000009740	brown
ENSRNOG00000026178	brown
ENSRNOG00000037984	brown
ENSRNOG00000038328	brown
ENSRNOG00000007684	brown
ENSRNOG00000021962	brown
ENSRNOG00000042411	brown
ENSRNOG00000029826	brown
ENSRNOG00000019189	brown
ENSRNOG00000003203	brown
ENSRNOG00000021669	brown
ENSRNOG00000000321	brown
ENSRNOG00000005464	brown
ENSRNOG00000007722	brown
ENSRNOG00000020134	brown
ENSRNOG00000039754	brown
ENSRNOG00000020531	brown
ENSRNOG00000019322	brown
ENSRNOG00000002960	brown
ENSRNOG00000024019	brown
ENSRNOG00000010161	brown
ENSRNOG00000001996	brown
ENSRNOG00000017826	brown
ENSRNOG00000001224	brown
ENSRNOG00000013621	brown
ENSRNOG00000011632	brown
ENSRNOG00000017419	brown
ENSRNOG00000012957	brown
ENSRNOG00000025296	brown
ENSRNOG00000019262	brown
ENSRNOG00000006392	brown
ENSRNOG00000013681	brown
ENSRNOG00000009934	brown
ENSRNOG00000009465	brown
ENSRNOG00000021086	brown
ENSRNOG00000005388	brown
ENSRNOG00000007788	brown
ENSRNOG00000016488	brown
ENSRNOG00000016164	brown
ENSRNOG00000006436	brown
ENSRNOG00000024818	brown
ENSRNOG00000007483	brown
ENSRNOG00000009663	brown
ENSRNOG00000027008	brown
ENSRNOG00000007574	brown
ENSRNOG00000018971	brown
ENSRNOG00000013578	brown
ENSRNOG00000015448	brown
ENSRNOG00000014440	brown
ENSRNOG00000010539	brown
ENSRNOG00000028176	brown
ENSRNOG00000004668	brown
ENSRNOG00000016675	brown
ENSRNOG00000021440	brown
ENSRNOG00000022402	brown
ENSRNOG00000000660	brown
ENSRNOG00000006304	brown
ENSRNOG00000009848	brown
ENSRNOG00000001177	brown
ENSRNOG00000003942	brown
ENSRNOG00000021805	brown
ENSRNOG00000019752	brown
ENSRNOG00000014571	brown
ENSRNOG00000023338	brown
ENSRNOG00000006384	brown
ENSRNOG00000020371	brown
ENSRNOG00000012565	brown
ENSRNOG00000023098	brown
ENSRNOG00000036798	brown
ENSRNOG00000015118	brown
ENSRNOG00000015020	brown
ENSRNOG00000010407	brown
ENSRNOG00000031700	brown
ENSRNOG00000016753	brown
ENSRNOG00000006539	brown
ENSRNOG00000026229	brown
ENSRNOG00000027867	brown
ENSRNOG00000012186	brown
ENSRNOG00000015303	brown
ENSRNOG00000022919	brown
ENSRNOG00000010887	brown
ENSRNOG00000007590	brown
ENSRNOG00000005984	brown
ENSRNOG00000013376	brown
ENSRNOG00000015648	brown
ENSRNOG00000018838	brown
ENSRNOG00000009046	brown
ENSRNOG00000018648	brown
ENSRNOG00000017766	brown
ENSRNOG00000042326	brown
ENSRNOG00000018841	brown
ENSRNOG00000008472	brown
ENSRNOG00000016532	brown
ENSRNOG00000021117	brown
ENSRNOG00000012622	brown
ENSRNOG00000014832	brown
ENSRNOG00000007350	brown
ENSRNOG00000017354	brown
ENSRNOG00000026458	brown
ENSRNOG00000017913	brown
ENSRNOG00000000034	brown
ENSRNOG00000012853	brown
ENSRNOG00000026336	brown
ENSRNOG00000018771	brown
ENSRNOG00000006705	brown
ENSRNOG00000008154	brown
ENSRNOG00000015109	brown
ENSRNOG00000030667	brown
ENSRNOG00000010448	brown
ENSRNOG00000009599	brown
ENSRNOG00000005281	brown
ENSRNOG00000009953	brown
ENSRNOG00000011618	brown
ENSRNOG00000009738	brown
ENSRNOG00000019674	brown
ENSRNOG00000019960	brown
ENSRNOG00000008512	brown
ENSRNOG00000021916	brown
ENSRNOG00000007972	brown
ENSRNOG00000001953	brown
ENSRNOG00000039862	brown
ENSRNOG00000012927	brown
ENSRNOG00000004542	brown
ENSRNOG00000014030	brown
ENSRNOG00000012385	brown4
ENSRNOG00000019041	brown4
ENSRNOG00000031085	brown4
ENSRNOG00000037254	brown4
ENSRNOG00000009244	brown4
ENSRNOG00000003712	brown4
ENSRNOG00000037246	brown4
ENSRNOG00000018107	brown4
ENSRNOG00000000070	brown4
ENSRNOG00000038085	brown4
ENSRNOG00000004521	brown4
ENSRNOG00000015078	brown4
ENSRNOG00000017318	brown4
ENSRNOG00000005736	brown4
ENSRNOG00000036835	brown4
ENSRNOG00000043447	brown4
ENSRNOG00000007249	brown4
ENSRNOG00000038909	brown4
ENSRNOG00000013763	brown4
ENSRNOG00000010320	brown4
ENSRNOG00000006868	brown4
ENSRNOG00000031312	brown4
ENSRNOG00000003399	brown4
ENSRNOG00000006763	brown4
ENSRNOG00000023708	brown4
ENSRNOG00000033551	brown4
ENSRNOG00000010934	brown4
ENSRNOG00000020845	brown4
ENSRNOG00000019246	brown4
ENSRNOG00000017328	brown4
ENSRNOG00000010153	brown4
ENSRNOG00000019017	brown4
ENSRNOG00000002177	brown4
ENSRNOG00000026050	brown4
ENSRNOG00000002478	brown4
ENSRNOG00000028395	brown4
ENSRNOG00000031197	brown4
ENSRNOG00000015255	brown4
ENSRNOG00000025806	brown4
ENSRNOG00000014783	brown4
ENSRNOG00000025787	brown4
ENSRNOG00000000105	cyan
ENSRNOG00000033155	cyan
ENSRNOG00000018176	cyan
ENSRNOG00000024923	cyan
ENSRNOG00000020299	cyan
ENSRNOG00000007744	cyan
ENSRNOG00000018217	cyan
ENSRNOG00000006979	cyan
ENSRNOG00000038686	cyan
ENSRNOG00000006037	cyan
ENSRNOG00000006957	cyan
ENSRNOG00000007686	cyan
ENSRNOG00000018337	cyan
ENSRNOG00000016789	cyan
ENSRNOG00000015425	cyan
ENSRNOG00000014348	cyan
ENSRNOG00000018645	cyan
ENSRNOG00000020010	cyan
ENSRNOG00000024930	cyan
ENSRNOG00000008477	cyan
ENSRNOG00000008822	cyan
ENSRNOG00000017495	cyan
ENSRNOG00000017251	cyan
ENSRNOG00000004959	cyan
ENSRNOG00000017695	cyan
ENSRNOG00000019773	cyan
ENSRNOG00000026679	cyan
ENSRNOG00000021269	cyan
ENSRNOG00000027487	cyan
ENSRNOG00000013604	cyan
ENSRNOG00000007663	cyan
ENSRNOG00000010146	cyan
ENSRNOG00000032436	cyan
ENSRNOG00000008934	cyan
ENSRNOG00000010635	cyan
ENSRNOG00000015780	cyan
ENSRNOG00000016251	cyan
ENSRNOG00000020315	cyan
ENSRNOG00000019193	cyan
ENSRNOG00000003151	cyan
ENSRNOG00000021938	cyan
ENSRNOG00000036742	cyan
ENSRNOG00000010544	cyan
ENSRNOG00000003990	cyan
ENSRNOG00000005705	cyan
ENSRNOG00000018586	cyan
ENSRNOG00000000111	cyan
ENSRNOG00000029988	cyan
ENSRNOG00000003019	cyan
ENSRNOG00000004581	cyan
ENSRNOG00000037945	cyan
ENSRNOG00000016885	cyan
ENSRNOG00000017441	cyan
ENSRNOG00000008565	cyan
ENSRNOG00000008316	cyan
ENSRNOG00000031032	cyan
ENSRNOG00000016603	cyan
ENSRNOG00000009945	cyan
ENSRNOG00000014963	cyan
ENSRNOG00000014575	cyan
ENSRNOG00000002882	cyan
ENSRNOG00000001033	cyan
ENSRNOG00000001149	cyan
ENSRNOG00000001215	cyan
ENSRNOG00000008214	cyan
ENSRNOG00000003014	cyan
ENSRNOG00000021565	cyan
ENSRNOG00000043182	cyan
ENSRNOG00000016383	cyan
ENSRNOG00000019724	cyan
ENSRNOG00000011535	cyan
ENSRNOG00000021392	cyan
ENSRNOG00000027360	cyan
ENSRNOG00000015079	cyan
ENSRNOG00000022750	cyan
ENSRNOG00000020463	cyan
ENSRNOG00000005492	cyan
ENSRNOG00000006420	cyan
ENSRNOG00000003069	cyan
ENSRNOG00000020851	cyan
ENSRNOG00000015644	cyan
ENSRNOG00000000327	cyan
ENSRNOG00000012297	cyan
ENSRNOG00000017187	cyan
ENSRNOG00000001889	cyan
ENSRNOG00000019053	cyan
ENSRNOG00000030791	cyan
ENSRNOG00000006904	cyan
ENSRNOG00000013875	cyan
ENSRNOG00000019760	cyan
ENSRNOG00000009950	cyan
ENSRNOG00000042653	cyan
ENSRNOG00000032254	cyan
ENSRNOG00000032878	cyan
ENSRNOG00000021229	cyan
ENSRNOG00000017456	cyan
ENSRNOG00000011800	cyan
ENSRNOG00000019425	cyan
ENSRNOG00000012366	cyan
ENSRNOG00000004777	cyan
ENSRNOG00000000540	cyan
ENSRNOG00000011029	cyan
ENSRNOG00000042767	cyan
ENSRNOG00000029341	cyan
ENSRNOG00000017820	cyan
ENSRNOG00000002546	cyan
ENSRNOG00000027918	cyan
ENSRNOG00000018590	cyan
ENSRNOG00000003123	cyan
ENSRNOG00000003048	cyan
ENSRNOG00000001425	cyan
ENSRNOG00000008825	cyan
ENSRNOG00000008390	cyan
ENSRNOG00000001134	cyan
ENSRNOG00000020616	cyan
ENSRNOG00000037435	cyan
ENSRNOG00000025030	cyan
ENSRNOG00000012228	cyan
ENSRNOG00000042417	cyan
ENSRNOG00000000244	cyan
ENSRNOG00000001782	cyan
ENSRNOG00000021156	cyan
ENSRNOG00000026814	cyan
ENSRNOG00000003699	cyan
ENSRNOG00000006068	cyan
ENSRNOG00000030800	cyan
ENSRNOG00000005487	cyan
ENSRNOG00000005374	cyan
ENSRNOG00000017622	cyan
ENSRNOG00000013136	cyan
ENSRNOG00000009605	cyan
ENSRNOG00000017321	cyan
ENSRNOG00000003592	cyan
ENSRNOG00000008641	cyan
ENSRNOG00000033639	cyan
ENSRNOG00000004411	cyan
ENSRNOG00000002643	cyan
ENSRNOG00000024705	cyan
ENSRNOG00000034078	cyan
ENSRNOG00000000954	cyan
ENSRNOG00000005397	cyan
ENSRNOG00000016692	cyan
ENSRNOG00000007865	cyan
ENSRNOG00000006327	cyan
ENSRNOG00000003815	cyan
ENSRNOG00000002292	darkgreen
ENSRNOG00000038045	darkgreen
ENSRNOG00000004629	darkgreen
ENSRNOG00000023086	darkgreen
ENSRNOG00000029042	darkgreen
ENSRNOG00000031053	darkgreen
ENSRNOG00000017558	darkgreen
ENSRNOG00000015457	darkgreen
ENSRNOG00000029738	darkgreen
ENSRNOG00000012180	darkgreen
ENSRNOG00000009470	darkgreen
ENSRNOG00000020977	darkgreen
ENSRNOG00000017243	darkgreen
ENSRNOG00000002343	darkgreen
ENSRNOG00000016623	darkgreen
ENSRNOG00000006865	darkgreen
ENSRNOG00000024243	darkgreen
ENSRNOG00000037033	darkgreen
ENSRNOG00000020526	darkgreen
ENSRNOG00000016143	darkgreen
ENSRNOG00000011771	darkgreen
ENSRNOG00000009600	darkgreen
ENSRNOG00000034052	darkgreen
ENSRNOG00000003071	darkgreen
ENSRNOG00000009028	darkgreen
ENSRNOG00000038687	darkgreen
ENSRNOG00000008104	darkgreen
ENSRNOG00000020351	darkgreen
ENSRNOG00000002342	darkgreen
ENSRNOG00000000979	darkgreen
ENSRNOG00000043387	darkgreen
ENSRNOG00000017747	darkgreen
ENSRNOG00000008784	darkgreen
ENSRNOG00000002877	darkgreen
ENSRNOG00000029863	darkgreen
ENSRNOG00000021145	darkgreen
ENSRNOG00000021044	darkgreen
ENSRNOG00000017445	darkgreen
ENSRNOG00000008794	darkgreen
ENSRNOG00000013384	darkgreen
ENSRNOG00000020857	darkgreen
ENSRNOG00000000520	darkgreen
ENSRNOG00000006148	darkgreen
ENSRNOG00000013836	darkgreen
ENSRNOG00000006062	darkgreen
ENSRNOG00000017099	darkgreen
ENSRNOG00000001090	darkgreen
ENSRNOG00000019237	darkgreen
ENSRNOG00000008012	darkgreen
ENSRNOG00000012798	darkgreen
ENSRNOG00000013000	darkgreen
ENSRNOG00000014765	darkgreen
ENSRNOG00000021433	darkgreen
ENSRNOG00000016249	darkgreen
ENSRNOG00000031378	darkgreen
ENSRNOG00000015392	darkgreen
ENSRNOG00000039147	darkgreen
ENSRNOG00000006645	darkgreen
ENSRNOG00000016256	darkgreen
ENSRNOG00000011062	darkgreen
ENSRNOG00000008424	darkgreen
ENSRNOG00000017002	darkgreen
ENSRNOG00000001804	darkgreen
ENSRNOG00000008872	darkgreen
ENSRNOG00000006827	darkgreen
ENSRNOG00000025014	darkgreen
ENSRNOG00000017209	darkgreen
ENSRNOG00000020159	darkgreen
ENSRNOG00000003122	darkgreen
ENSRNOG00000030447	darkgreen
ENSRNOG00000025060	darkgreen
ENSRNOG00000043366	darkgreen
ENSRNOG00000029305	darkgreen
ENSRNOG00000014092	darkgreen
ENSRNOG00000009330	darkgreen
ENSRNOG00000001293	darkgreen
ENSRNOG00000020700	darkgreen
ENSRNOG00000016408	darkgreen
ENSRNOG00000007803	darkgreen
ENSRNOG00000010881	darkgreen
ENSRNOG00000011613	darkgreen
ENSRNOG00000014274	darkgreen
ENSRNOG00000021047	darkgreen
ENSRNOG00000041989	darkgreen
ENSRNOG00000019817	darkgreen
ENSRNOG00000011154	darkgreen
ENSRNOG00000039200	darkgreen
ENSRNOG00000027234	darkgreen
ENSRNOG00000045060	darkgreen
ENSRNOG00000016580	darkgrey
ENSRNOG00000003844	darkgrey
ENSRNOG00000020618	darkgrey
ENSRNOG00000013579	darkgrey
ENSRNOG00000000395	darkgrey
ENSRNOG00000011104	darkgrey
ENSRNOG00000014323	darkgrey
ENSRNOG00000007806	darkgrey
ENSRNOG00000025496	darkgrey
ENSRNOG00000019027	darkgrey
ENSRNOG00000011728	darkgrey
ENSRNOG00000031697	darkgrey
ENSRNOG00000002609	darkgrey
ENSRNOG00000038597	darkgrey
ENSRNOG00000042195	darkgrey
ENSRNOG00000010239	darkgrey
ENSRNOG00000017674	darkgrey
ENSRNOG00000012054	darkgrey
ENSRNOG00000017396	darkgrey
ENSRNOG00000024647	darkgrey
ENSRNOG00000011155	darkgrey
ENSRNOG00000004741	darkgrey
ENSRNOG00000033058	darkgrey
ENSRNOG00000002112	darkgrey
ENSRNOG00000042072	darkgrey
ENSRNOG00000007238	darkgrey
ENSRNOG00000020698	darkgrey
ENSRNOG00000027149	darkgrey
ENSRNOG00000002669	darkgrey
ENSRNOG00000015479	darkgrey
ENSRNOG00000029958	darkgrey
ENSRNOG00000018144	darkgrey
ENSRNOG00000001613	darkgrey
ENSRNOG00000019442	darkgrey
ENSRNOG00000003496	darkgrey
ENSRNOG00000017742	darkgrey
ENSRNOG00000016246	darkgrey
ENSRNOG00000017852	darkgrey
ENSRNOG00000007172	darkgrey
ENSRNOG00000015290	darkgrey
ENSRNOG00000014000	darkgrey
ENSRNOG00000042081	darkgrey
ENSRNOG00000011413	darkgrey
ENSRNOG00000004549	darkgrey
ENSRNOG00000024994	darkgrey
ENSRNOG00000005330	darkgrey
ENSRNOG00000024539	darkgrey
ENSRNOG00000010812	darkgrey
ENSRNOG00000022772	darkgrey
ENSRNOG00000001068	darkgrey
ENSRNOG00000016896	darkgrey
ENSRNOG00000012842	darkgrey
ENSRNOG00000008788	darkgrey
ENSRNOG00000003797	darkgrey
ENSRNOG00000013286	darkgrey
ENSRNOG00000010171	darkgrey
ENSRNOG00000018033	darkgrey
ENSRNOG00000022444	darkgrey
ENSRNOG00000020233	darkgrey
ENSRNOG00000025443	darkgrey
ENSRNOG00000012126	darkgrey
ENSRNOG00000015857	darkgrey
ENSRNOG00000024702	darkgrey
ENSRNOG00000032410	darkgrey
ENSRNOG00000003108	darkgrey
ENSRNOG00000020642	darkgrey
ENSRNOG00000004650	darkgrey
ENSRNOG00000039203	darkgrey
ENSRNOG00000013548	darkgrey
ENSRNOG00000005902	darkgrey
ENSRNOG00000009318	darkgrey
ENSRNOG00000038079	darkgrey
ENSRNOG00000028387	darkgrey
ENSRNOG00000024170	darkgrey
ENSRNOG00000025782	darkgrey
ENSRNOG00000029456	darkgrey
ENSRNOG00000008560	darkgrey
ENSRNOG00000000557	darkgrey
ENSRNOG00000012392	darkgrey
ENSRNOG00000018949	darkgrey
ENSRNOG00000002538	darkgrey
ENSRNOG00000017427	darkgrey
ENSRNOG00000017843	darkgrey
ENSRNOG00000033389	darkgrey
ENSRNOG00000014066	darkgrey
ENSRNOG00000000123	darkgrey
ENSRNOG00000001010	darkmagenta
ENSRNOG00000019180	darkmagenta
ENSRNOG00000021338	darkmagenta
ENSRNOG00000004925	darkmagenta
ENSRNOG00000025554	darkmagenta
ENSRNOG00000008861	darkmagenta
ENSRNOG00000024186	darkmagenta
ENSRNOG00000018392	darkmagenta
ENSRNOG00000025083	darkmagenta
ENSRNOG00000013595	darkmagenta
ENSRNOG00000014272	darkmagenta
ENSRNOG00000030561	darkmagenta
ENSRNOG00000011653	darkmagenta
ENSRNOG00000003533	darkmagenta
ENSRNOG00000032045	darkmagenta
ENSRNOG00000004908	darkmagenta
ENSRNOG00000004864	darkmagenta
ENSRNOG00000029087	darkmagenta
ENSRNOG00000020266	darkmagenta
ENSRNOG00000031896	darkmagenta
ENSRNOG00000008008	darkmagenta
ENSRNOG00000016387	darkmagenta
ENSRNOG00000009894	darkmagenta
ENSRNOG00000002255	darkmagenta
ENSRNOG00000023387	darkmagenta
ENSRNOG00000039630	darkmagenta
ENSRNOG00000013271	darkmagenta
ENSRNOG00000020527	darkmagenta
ENSRNOG00000006325	darkmagenta
ENSRNOG00000027503	darkmagenta
ENSRNOG00000011261	darkmagenta
ENSRNOG00000042320	darkmagenta
ENSRNOG00000015501	darkmagenta
ENSRNOG00000021875	darkmagenta
ENSRNOG00000001309	darkmagenta
ENSRNOG00000004262	darkmagenta
ENSRNOG00000030302	darkmagenta
ENSRNOG00000022247	darkmagenta
ENSRNOG00000030705	darkmagenta
ENSRNOG00000025923	darkmagenta
ENSRNOG00000032039	darkmagenta
ENSRNOG00000014270	darkmagenta
ENSRNOG00000014937	darkmagenta
ENSRNOG00000016410	darkmagenta
ENSRNOG00000031591	darkmagenta
ENSRNOG00000032773	darkmagenta
ENSRNOG00000009730	darkmagenta
ENSRNOG00000020996	darkmagenta
ENSRNOG00000011315	darkmagenta
ENSRNOG00000009857	darkmagenta
ENSRNOG00000003863	darkmagenta
ENSRNOG00000007447	darkmagenta
ENSRNOG00000014291	darkmagenta
ENSRNOG00000004873	darkmagenta
ENSRNOG00000000068	darkmagenta
ENSRNOG00000004499	darkmagenta
ENSRNOG00000007346	darkolivegreen
ENSRNOG00000021513	darkolivegreen
ENSRNOG00000010060	darkolivegreen
ENSRNOG00000017644	darkolivegreen
ENSRNOG00000002196	darkolivegreen
ENSRNOG00000021026	darkolivegreen
ENSRNOG00000000781	darkolivegreen
ENSRNOG00000029535	darkolivegreen
ENSRNOG00000009642	darkolivegreen
ENSRNOG00000028743	darkolivegreen
ENSRNOG00000017659	darkolivegreen
ENSRNOG00000008113	darkolivegreen
ENSRNOG00000007044	darkolivegreen
ENSRNOG00000019555	darkolivegreen
ENSRNOG00000014193	darkolivegreen
ENSRNOG00000005106	darkolivegreen
ENSRNOG00000020867	darkolivegreen
ENSRNOG00000042422	darkolivegreen
ENSRNOG00000028017	darkolivegreen
ENSRNOG00000004314	darkolivegreen
ENSRNOG00000023366	darkolivegreen
ENSRNOG00000022171	darkolivegreen
ENSRNOG00000018599	darkolivegreen
ENSRNOG00000014153	darkolivegreen
ENSRNOG00000017863	darkolivegreen
ENSRNOG00000009289	darkolivegreen
ENSRNOG00000016827	darkolivegreen
ENSRNOG00000029207	darkolivegreen
ENSRNOG00000001455	darkolivegreen
ENSRNOG00000010904	darkolivegreen
ENSRNOG00000012989	darkolivegreen
ENSRNOG00000010872	darkolivegreen
ENSRNOG00000001575	darkolivegreen
ENSRNOG00000023910	darkolivegreen
ENSRNOG00000022260	darkolivegreen
ENSRNOG00000032339	darkolivegreen
ENSRNOG00000019393	darkolivegreen
ENSRNOG00000013587	darkolivegreen
ENSRNOG00000005569	darkolivegreen
ENSRNOG00000032407	darkolivegreen
ENSRNOG00000017787	darkolivegreen
ENSRNOG00000012227	darkolivegreen
ENSRNOG00000015676	darkolivegreen
ENSRNOG00000007817	darkolivegreen
ENSRNOG00000006727	darkolivegreen
ENSRNOG00000015848	darkolivegreen
ENSRNOG00000000216	darkolivegreen
ENSRNOG00000003524	darkolivegreen
ENSRNOG00000016064	darkolivegreen
ENSRNOG00000000529	darkolivegreen
ENSRNOG00000029466	darkolivegreen
ENSRNOG00000000567	darkolivegreen
ENSRNOG00000011791	darkolivegreen
ENSRNOG00000009482	darkolivegreen
ENSRNOG00000001252	darkolivegreen
ENSRNOG00000004137	darkolivegreen
ENSRNOG00000029360	darkorange
ENSRNOG00000001992	darkorange
ENSRNOG00000029014	darkorange
ENSRNOG00000001592	darkorange
ENSRNOG00000018768	darkorange
ENSRNOG00000038678	darkorange
ENSRNOG00000031783	darkorange
ENSRNOG00000033625	darkorange
ENSRNOG00000021685	darkorange
ENSRNOG00000014980	darkorange
ENSRNOG00000016677	darkorange
ENSRNOG00000001773	darkorange
ENSRNOG00000021055	darkorange
ENSRNOG00000005733	darkorange
ENSRNOG00000029454	darkorange
ENSRNOG00000003520	darkorange
ENSRNOG00000005890	darkorange
ENSRNOG00000024336	darkorange
ENSRNOG00000011340	darkorange
ENSRNOG00000010176	darkorange
ENSRNOG00000025528	darkorange
ENSRNOG00000004612	darkorange
ENSRNOG00000002529	darkorange
ENSRNOG00000005927	darkorange
ENSRNOG00000027690	darkorange
ENSRNOG00000017560	darkorange
ENSRNOG00000005447	darkorange
ENSRNOG00000003706	darkorange
ENSRNOG00000008034	darkorange
ENSRNOG00000002475	darkorange
ENSRNOG00000010550	darkorange
ENSRNOG00000007998	darkorange
ENSRNOG00000003163	darkorange
ENSRNOG00000023484	darkorange
ENSRNOG00000017074	darkorange
ENSRNOG00000005386	darkorange
ENSRNOG00000012734	darkorange
ENSRNOG00000000170	darkorange
ENSRNOG00000016088	darkorange
ENSRNOG00000014031	darkorange
ENSRNOG00000031736	darkorange
ENSRNOG00000011647	darkorange
ENSRNOG00000003392	darkorange
ENSRNOG00000003475	darkorange
ENSRNOG00000019387	darkorange
ENSRNOG00000020038	darkorange
ENSRNOG00000006180	darkorange
ENSRNOG00000029304	darkorange
ENSRNOG00000013255	darkorange
ENSRNOG00000000853	darkorange
ENSRNOG00000029256	darkorange
ENSRNOG00000012181	darkorange
ENSRNOG00000002523	darkorange
ENSRNOG00000006749	darkorange
ENSRNOG00000036754	darkorange
ENSRNOG00000024800	darkorange
ENSRNOG00000000490	darkorange
ENSRNOG00000018063	darkorange
ENSRNOG00000006632	darkorange
ENSRNOG00000017022	darkorange
ENSRNOG00000012095	darkorange
ENSRNOG00000013360	darkorange
ENSRNOG00000013456	darkorange
ENSRNOG00000032588	darkorange
ENSRNOG00000004339	darkorange
ENSRNOG00000010147	darkorange
ENSRNOG00000007535	darkorange
ENSRNOG00000042824	darkorange
ENSRNOG00000017505	darkorange
ENSRNOG00000016468	darkorange
ENSRNOG00000004484	darkorange
ENSRNOG00000008937	darkorange
ENSRNOG00000036660	darkorange
ENSRNOG00000021283	darkorange
ENSRNOG00000013660	darkorange
ENSRNOG00000025527	darkorange2
ENSRNOG00000015133	darkorange2
ENSRNOG00000023509	darkorange2
ENSRNOG00000043498	darkorange2
ENSRNOG00000033556	darkorange2
ENSRNOG00000006972	darkorange2
ENSRNOG00000025634	darkorange2
ENSRNOG00000007329	darkorange2
ENSRNOG00000019742	darkorange2
ENSRNOG00000020811	darkorange2
ENSRNOG00000012466	darkorange2
ENSRNOG00000002232	darkorange2
ENSRNOG00000020676	darkorange2
ENSRNOG00000029028	darkorange2
ENSRNOG00000019844	darkorange2
ENSRNOG00000028816	darkorange2
ENSRNOG00000001197	darkorange2
ENSRNOG00000015107	darkorange2
ENSRNOG00000021007	darkorange2
ENSRNOG00000028501	darkorange2
ENSRNOG00000005585	darkorange2
ENSRNOG00000000924	darkorange2
ENSRNOG00000017953	darkorange2
ENSRNOG00000011317	darkorange2
ENSRNOG00000010914	darkorange2
ENSRNOG00000006924	darkorange2
ENSRNOG00000009568	darkorange2
ENSRNOG00000000503	darkorange2
ENSRNOG00000011409	darkorange2
ENSRNOG00000007089	darkorange2
ENSRNOG00000017889	darkorange2
ENSRNOG00000006701	darkorange2
ENSRNOG00000000718	darkorange2
ENSRNOG00000001138	darkorange2
ENSRNOG00000002146	darkorange2
ENSRNOG00000017404	darkorange2
ENSRNOG00000015977	darkorange2
ENSRNOG00000013968	darkorange2
ENSRNOG00000005256	darkorange2
ENSRNOG00000006048	darkorange2
ENSRNOG00000008431	darkorange2
ENSRNOG00000008334	darkorange2
ENSRNOG00000008258	darkred
ENSRNOG00000004040	darkred
ENSRNOG00000001158	darkred
ENSRNOG00000014251	darkred
ENSRNOG00000024578	darkred
ENSRNOG00000001172	darkred
ENSRNOG00000000867	darkred
ENSRNOG00000016161	darkred
ENSRNOG00000007472	darkred
ENSRNOG00000015904	darkred
ENSRNOG00000016321	darkred
ENSRNOG00000020468	darkred
ENSRNOG00000026589	darkred
ENSRNOG00000013171	darkred
ENSRNOG00000031824	darkred
ENSRNOG00000030776	darkred
ENSRNOG00000010975	darkred
ENSRNOG00000000219	darkred
ENSRNOG00000000461	darkred
ENSRNOG00000014556	darkred
ENSRNOG00000003469	darkred
ENSRNOG00000008178	darkred
ENSRNOG00000015440	darkred
ENSRNOG00000018126	darkred
ENSRNOG00000018606	darkred
ENSRNOG00000010777	darkred
ENSRNOG00000017491	darkred
ENSRNOG00000040242	darkred
ENSRNOG00000009850	darkred
ENSRNOG00000021084	darkred
ENSRNOG00000009946	darkred
ENSRNOG00000015898	darkred
ENSRNOG00000006200	darkred
ENSRNOG00000001040	darkred
ENSRNOG00000009910	darkred
ENSRNOG00000018477	darkred
ENSRNOG00000024239	darkred
ENSRNOG00000001283	darkred
ENSRNOG00000028556	darkred
ENSRNOG00000013484	darkred
ENSRNOG00000012502	darkred
ENSRNOG00000015339	darkred
ENSRNOG00000031760	darkred
ENSRNOG00000033019	darkred
ENSRNOG00000000158	darkred
ENSRNOG00000016550	darkred
ENSRNOG00000002896	darkred
ENSRNOG00000024533	darkred
ENSRNOG00000014483	darkred
ENSRNOG00000018350	darkred
ENSRNOG00000015699	darkred
ENSRNOG00000004483	darkred
ENSRNOG00000015124	darkred
ENSRNOG00000002296	darkred
ENSRNOG00000042496	darkred
ENSRNOG00000016919	darkred
ENSRNOG00000030034	darkred
ENSRNOG00000000826	darkred
ENSRNOG00000018564	darkred
ENSRNOG00000019933	darkred
ENSRNOG00000016573	darkred
ENSRNOG00000014648	darkred
ENSRNOG00000015849	darkred
ENSRNOG00000039976	darkred
ENSRNOG00000014584	darkred
ENSRNOG00000012343	darkred
ENSRNOG00000000967	darkred
ENSRNOG00000000981	darkred
ENSRNOG00000021735	darkred
ENSRNOG00000009808	darkred
ENSRNOG00000022044	darkred
ENSRNOG00000003005	darkred
ENSRNOG00000001216	darkred
ENSRNOG00000014857	darkred
ENSRNOG00000037664	darkred
ENSRNOG00000014720	darkred
ENSRNOG00000003269	darkred
ENSRNOG00000021203	darkred
ENSRNOG00000014330	darkred
ENSRNOG00000016207	darkred
ENSRNOG00000002912	darkred
ENSRNOG00000011319	darkred
ENSRNOG00000018356	darkred
ENSRNOG00000021609	darkred
ENSRNOG00000020663	darkred
ENSRNOG00000007920	darkred
ENSRNOG00000001059	darkred
ENSRNOG00000007246	darkred
ENSRNOG00000015888	darkred
ENSRNOG00000014868	darkslateblue
ENSRNOG00000018372	darkslateblue
ENSRNOG00000019697	darkslateblue
ENSRNOG00000009161	darkslateblue
ENSRNOG00000009523	darkslateblue
ENSRNOG00000002871	darkslateblue
ENSRNOG00000033378	darkslateblue
ENSRNOG00000024616	darkslateblue
ENSRNOG00000036695	darkslateblue
ENSRNOG00000032902	darkslateblue
ENSRNOG00000012255	darkslateblue
ENSRNOG00000028129	darkslateblue
ENSRNOG00000026573	darkslateblue
ENSRNOG00000022395	darkslateblue
ENSRNOG00000019957	darkslateblue
ENSRNOG00000005668	darkslateblue
ENSRNOG00000012820	darkslateblue
ENSRNOG00000004332	darkslateblue
ENSRNOG00000031135	darkslateblue
ENSRNOG00000020915	darkslateblue
ENSRNOG00000032748	darkslateblue
ENSRNOG00000036827	darkslateblue
ENSRNOG00000018848	darkslateblue
ENSRNOG00000013089	darkslateblue
ENSRNOG00000004964	darkslateblue
ENSRNOG00000001766	darkslateblue
ENSRNOG00000025114	darkslateblue
ENSRNOG00000019908	darkslateblue
ENSRNOG00000006206	darkslateblue
ENSRNOG00000020395	darkslateblue
ENSRNOG00000021030	darkslateblue
ENSRNOG00000000949	darkslateblue
ENSRNOG00000019012	darkslateblue
ENSRNOG00000019268	darkslateblue
ENSRNOG00000013679	darkslateblue
ENSRNOG00000027582	darkslateblue
ENSRNOG00000003042	darkslateblue
ENSRNOG00000006459	darkslateblue
ENSRNOG00000021102	darkturquoise
ENSRNOG00000025589	darkturquoise
ENSRNOG00000023521	darkturquoise
ENSRNOG00000032936	darkturquoise
ENSRNOG00000020660	darkturquoise
ENSRNOG00000019435	darkturquoise
ENSRNOG00000019958	darkturquoise
ENSRNOG00000007042	darkturquoise
ENSRNOG00000014302	darkturquoise
ENSRNOG00000024641	darkturquoise
ENSRNOG00000032569	darkturquoise
ENSRNOG00000005148	darkturquoise
ENSRNOG00000033202	darkturquoise
ENSRNOG00000001291	darkturquoise
ENSRNOG00000043161	darkturquoise
ENSRNOG00000025594	darkturquoise
ENSRNOG00000018137	darkturquoise
ENSRNOG00000000054	darkturquoise
ENSRNOG00000000231	darkturquoise
ENSRNOG00000020200	darkturquoise
ENSRNOG00000020567	darkturquoise
ENSRNOG00000002389	darkturquoise
ENSRNOG00000019228	darkturquoise
ENSRNOG00000030180	darkturquoise
ENSRNOG00000042464	darkturquoise
ENSRNOG00000026238	darkturquoise
ENSRNOG00000043866	darkturquoise
ENSRNOG00000016229	darkturquoise
ENSRNOG00000003267	darkturquoise
ENSRNOG00000005129	darkturquoise
[truncated: 10,618 more rows]

## Sheet: S3B
Cluster	eQTL_chr	eQTL_start_cM	eQTL_peak_cM	eQTL_end_cM	eQTL_start_Mb	eQTL_peak_Mb	eQTL_end_Mb	FIA_score
salmon4	1	108.833	126	143.167	177.099	203.408	229.606	65.506
black	1	0	14	31.1674	3	18.0317	32.791	59.9893
darkolivegreen	2	125.107	142	148	229.058	248.3	254.3	78.6179
lightcyan	2	78.8326	96	113.167	147.571	194.014	217.736	55.1466
brown	2	119.034	136	148	223.3	242.3	254.3	77.0897
royalblue	2	121.724	138	148	225.851	244.3	254.3	92.8865
tan	2	118.833	136	148	223.109	242.3	254.3	53.7513
thistle1	2	122.397	138	148	226.488	244.3	254.3	111.392
grey	2	74.8326	92	109.167	138.821	182.536	213.943	52.9894
darkslateblue	4	38.0273	54	69.9727	55.8545	88.72	127.36	100.812
darkred	4	31.3751	48	64.6249	43.8113	75.1429	117.018	84.5257
turquoise	4	26.8326	44	61.1674	38.0474	67.5238	107.962	60.9364
thistle2	4	18.9492	34	49.0508	28.0443	47.8	77.1444	129.327
palevioletred3	9	54.8326	72	86	71.467	91.8	111	60.8408
diumpurple3	10	16.8326	34	51.1674	20.8661	34.7395	59.9678	67.1958
darkorange2	14	2.83261	20	37.1674	5.02529	29.1765	62.2511	70.3832
plum2	14	0	0	16.4151	1	1	24.3268	89.455
skyblue	20	0	0	17.0298	11	11	24.9138	75.7676
green	20	24.9745	42	44	32.5347	47.7489	49	75.8565
darkturquoise	20	0	0	17.1674	11	11	25.0617	66.0166
blue	20	26.3705	42	44	33.7822	47.7489	49	110.61

## Sheet: S3C
Cluster	spearman_correlation_rho	pvalue	qvalue (FDR)
grey60	0.258	0.0013	0.016
paleturquoise	-0.213	0.0088	0.048
blue	-0.256	0.0015	0.016
thistle1	-0.284	0.0004	0.013
salmon	-0.234	0.0038	0.025
black	-0.244	0.0025	0.021

## Sheet: S3D
Cluster	Category	Count	List.Total	Pop.Hits	Pop.Total	Pvalue	Fold.Enrichment	Pvalue_Benjamini_Hochberg_adjusted	FDR	Term
grey60	INTERPRO	5	44	7	6700	5.07732e-08	108.766	4.36649e-06	5.47503e-05	IPR015706:RNA-directed DNA polymerase (reverse transcriptase), related
grey60	INTERPRO	4	44	5	6700	2.44103e-06	121.818	0.000104959	0.0026322	IPR004244:Transposase, L1
grey60	INTERPRO	4	44	11	6700	3.92073e-05	55.3719	0.00112333	0.0422703	IPR013544:Protein of unknown function DUF1725
grey60	INTERPRO	3	44	4	6700	0.00023946	114.205	0.00513577	0.257915	IPR000477:RNA-directed DNA polymerase (reverse transcriptase)
grey60	GOTERM_MF_FAT	3	43	5	6416	0.000413187	89.5256	0.0655308	0.499872	GO:0003964~RNA-directed DNA polymerase activity
grey60	GOTERM_BP_FAT	3	45	8	6558	0.00120077	54.65	0.463976	1.72424	GO:0006278~RNA-dependent DNA replication
grey60	INTERPRO	3	44	14	6700	0.00348667	32.6299	0.0583066	3.69631	IPR002345:Lipocalin
paleturquoise	UP_SEQ_FEATURE	4	28	61	4969	0.00417519	11.637	0.38708	4.66837	repeat:WD 6
blue	SP_PIR_KEYWORDS	82	278	1145	5856	4.67739e-05	1.50857	0.0145339	0.0628899	acetylation
blue	GOTERM_BP_FAT	16	294	121	6558	0.000292757	2.94957	0.422473	0.498377	GO:0019318~hexose metabolic process
blue	GOTERM_CC_FAT	6	286	14	5979	0.000333342	8.95954	0.114872	0.457958	GO:0000159~protein phosphatase type 2A complex
blue	GOTERM_BP_FAT	14	294	97	6558	0.000343145	3.21944	0.275123	0.583919	GO:0006006~glucose metabolic process
blue	KEGG_PATHWAY	9	155	40	3076	0.000642966	4.46516	0.0784359	0.743117	rno00010:Glycolysis / Gluconeogenesis
blue	GOTERM_BP_FAT	7	294	26	6558	0.000815222	6.00549	0.399337	1.38199	GO:0007059~chromosome segregation
blue	SMART	6	148	18	3326	0.000846274	7.49099	0.0896956	0.953568	SM00212:UBCc
blue	GOTERM_MF_FAT	4	292	5	6416	0.000862726	17.5781	0.344868	1.23172	GO:0008943~glyceraldehyde-3-phosphate dehydrogenase activity
blue	GOTERM_MF_FAT	4	292	5	6416	0.000862726	17.5781	0.344868	1.23172	GO:0004365~glyceraldehyde-3-phosphate dehydrogenase (phosphorylating) activity
blue	INTERPRO	6	318	18	6700	0.00118172	7.02306	0.490926	1.71955	IPR000608:Ubiquitin-conjugating enzyme, E2
blue	GOTERM_BP_FAT	11	294	72	6558	0.00124435	3.40788	0.442142	2.10222	GO:0010498~proteasomal protein catabolic process
blue	GOTERM_BP_FAT	11	294	72	6558	0.00124435	3.40788	0.442142	2.10222	GO:0043161~proteasomal ubiquitin-dependent protein catabolic process
blue	GOTERM_BP_FAT	35	294	450	6558	0.00161714	1.73492	0.454973	2.72388	GO:0015031~protein transport
blue	GOTERM_BP_FAT	35	294	452	6558	0.00171492	1.72724	0.415133	2.88631	GO:0045184~establishment of protein localization
blue	GOTERM_BP_FAT	16	294	144	6558	0.00183238	2.47846	0.388148	3.0811	GO:0005996~monosaccharide metabolic process
blue	SP_PIR_KEYWORDS	12	278	84	5856	0.00185482	3.00925	0.252147	2.46603	endosome
blue	GOTERM_BP_FAT	39	294	530	6558	0.00219115	1.64139	0.40197	3.67382	GO:0008104~protein localization
blue	INTERPRO	6	318	21	6700	0.00249677	6.01977	0.510181	3.60069	IPR016135:Ubiquitin-conjugating enzyme/RWD-like
blue	GOTERM_BP_FAT	5	294	14	6558	0.00273741	7.96647	0.435083	4.56972	GO:0008633~activation of pro-apoptotic gene products
blue	SP_PIR_KEYWORDS	13	278	102	5856	0.00294942	2.68472	0.265215	3.89479	methylation
blue	INTERPRO	6	318	22	6700	0.00310786	5.74614	0.447029	4.46336	IPR004843:Metallophosphoesterase
black	KEGG_PATHWAY	11	70	112	3076	0.000152556	4.31582	0.014239	0.167225	rno05012:Parkinson's disease
black	GOTERM_CC_FAT	12	119	153	5979	0.000195078	3.94068	0.0420132	0.248038	GO:0005840~ribosome
black	UP_SEQ_FEATURE	7	102	43	4969	0.000201407	7.93046	0.0611005	0.270542	lipid moiety-binding region:N-myristoyl glycine
black	SP_PIR_KEYWORDS	7	118	44	5856	0.000212447	7.89522	0.042011	0.266388	myristate
black	KEGG_PATHWAY	10	70	108	3076	0.00056419	4.06878	0.0261757	0.617173	rno00190:Oxidative phosphorylation
black	SP_PIR_KEYWORDS	10	118	122	5856	0.000685858	4.0678	0.066949	0.857649	ribosomal protein
black	GOTERM_MF_FAT	10	129	123	6416	0.00073133	4.04361	0.198237	0.973853	GO:0003735~structural constituent of ribosome
black	GOTERM_BP_FAT	14	135	233	6558	0.000893536	2.91884	0.641648	1.42695	GO:0006412~translation
black	GOTERM_BP_FAT	8	135	81	6558	0.00125674	4.79781	0.514134	2.0015	GO:0006414~translational elongation
black	SP_PIR_KEYWORDS	10	118	138	5856	0.00165084	3.59617	0.105283	2.05287	protein biosynthesis
black	GOTERM_MF_FAT	7	129	65	6416	0.0017679	5.35623	0.234471	2.33914	GO:0015078~hydrogen ion transmembrane transporter activity
black	KEGG_PATHWAY	8	70	80	3076	0.00181791	4.39429	0.0554183	1.97625	rno03010:Ribosome
black	GOTERM_MF_FAT	7	129	68	6416	0.00223154	5.11993	0.201398	2.94416	GO:0015077~monovalent inorganic cation transmembrane transporter activity
black	SP_PIR_KEYWORDS	7	118	74	5856	0.0034296	4.69446	0.159276	4.22136	ribosome
black	GOTERM_MF_FAT	11	129	183	6416	0.00343598	2.98962	0.228843	4.49969	GO:0016887~ATPase activity
black	KEGG_PATHWAY	10	70	141	3076	0.00373599	3.11651	0.0842027	4.02286	rno05016:Huntington's disease
black	PIR_SUPERFAMILY	3	62	5	2777	0.00454899	26.8742	0.279835	4.63489	PIRSF002034:ubiquitin

## Sheet: S3E
Cluster	Category	Count	List.Total	Pop.Hits	Pop.Total	Pvalue	Fold.Enrichment	Pvalue_Benjamini_Hochberg_adjusted	FDR	Term
brown	GOTERM_CC_FAT	80	217	1448	5979	2.40686e-05	1.52226	0.00702739	0.0320424	GO:0005886~plasma membrane
darkgrey	GOTERM_CC_FAT	13	43	299	5979	5.61568e-07	6.0455	7.01935e-05	0.000649402	GO:0030529~ribonucleoprotein complex
darkgrey	GOTERM_CC_FAT	10	43	153	5979	8.05649e-07	9.08801	5.03518e-05	0.000931658	GO:0005840~ribosome
darkgrey	SP_PIR_KEYWORDS	9	42	122	5856	1.51487e-06	10.2857	0.000139359	0.00165496	ribosomal protein
darkgrey	GOTERM_MF_FAT	9	49	123	6416	2.88313e-06	9.58089	0.000412203	0.0034144	GO:0003735~structural constituent of ribosome
darkgrey	KEGG_PATHWAY	8	28	80	3076	3.6084e-06	10.9857	0.00020205	0.00356301	rno03010:Ribosome
darkgrey	SP_PIR_KEYWORDS	9	42	146	5856	5.86628e-06	8.59491	0.000269813	0.00640862	ribonucleoprotein
darkgrey	GOTERM_BP_FAT	7	49	81	6558	2.38951e-05	11.5661	0.0117349	0.034346	GO:0006414~translational elongation
greenyellow	UP_SEQ_FEATURE	7	60	41	4969	7.04589e-06	14.1394	0.00197794	0.00932105	short sequence motif:PDZ-binding
grey60	INTERPRO	5	44	7	6700	5.07732e-08	108.766	4.36649e-06	5.47503e-05	IPR015706:RNA-directed DNA polymerase (reverse transcriptase), related
grey60	INTERPRO	4	44	5	6700	2.44103e-06	121.818	0.000104959	0.0026322	IPR004244:Transposase, L1
grey60	INTERPRO	4	44	11	6700	3.92073e-05	55.3719	0.00112333	0.0422703	IPR013544:Protein of unknown function DUF1725
mediumpurple3	GOTERM_CC_FAT	13	39	140	5979	2.72174e-11	14.2357	3.07556e-09	3.09034e-08	GO:0031012~extracellular matrix
mediumpurple3	GOTERM_CC_FAT	15	39	310	5979	2.37158e-09	7.41811	1.33994e-07	2.69276e-06	GO:0044421~extracellular region part
mediumpurple3	GOTERM_CC_FAT	17	39	480	5979	9.8691e-09	5.42965	3.71736e-07	1.12057e-05	GO:0005576~extracellular region
mediumpurple3	GOTERM_BP_FAT	8	38	52	6558	1.114e-08	26.5506	6.66168e-06	1.64454e-05	GO:0030198~extracellular matrix organization
mediumpurple3	SP_PIR_KEYWORDS	8	37	51	5856	1.70897e-08	24.8267	1.69188e-06	1.89325e-05	extracellular matrix
mediumpurple3	SP_PIR_KEYWORDS	12	37	263	5856	2.68926e-07	7.22146	1.33117e-05	0.000297924	Secreted
mediumpurple3	GOTERM_CC_FAT	9	39	114	5979	4.14412e-07	12.1032	1.17071e-05	0.000470535	GO:0005578~proteinaceous extracellular matrix
mediumpurple3	GOTERM_BP_FAT	8	38	91	6558	5.75878e-07	15.1718	0.000172173	0.000850136	GO:0043062~extracellular structure organization
mediumpurple3	SP_PIR_KEYWORDS	4	37	4	5856	8.50136e-07	158.27	2.80541e-05	0.000941805	oxygen carrier
mediumpurple3	SP_PIR_KEYWORDS	4	37	4	5856	8.50136e-07	158.27	2.80541e-05	0.000941805	blood
mediumpurple3	PIR_SUPERFAMILY	4	22	4	2777	1.48486e-06	126.227	2.96968e-05	0.00113011	PIRSF500045:hemoglobin, vertebrate type
mediumpurple3	GOTERM_CC_FAT	4	39	5	5979	2.34853e-06	122.646	5.30755e-05	0.00266656	GO:0005833~hemoglobin complex
mediumpurple3	SP_PIR_KEYWORDS	5	37	19	5856	4.36753e-06	41.6501	0.000108091	0.00483839	muscle protein
mediumpurple3	GOTERM_BP_FAT	4	38	7	6558	5.69843e-06	98.6165	0.00113525	0.00841197	GO:0015671~oxygen transport
mediumpurple3	UP_SEQ_FEATURE	4	36	6	4969	6.31299e-06	92.0185	0.000959118	0.00755577	metal ion-binding site:Iron (heme distal ligand)
mediumpurple3	GOTERM_MF_FAT	4	39	7	6416	6.60149e-06	94.0073	0.000903999	0.00775923	GO:0005344~oxygen transporter activity
mediumpurple3	INTERPRO	4	42	7	6700	7.32048e-06	91.1565	0.000761044	0.00818493	IPR012292:Globin
mediumpurple3	INTERPRO	4	42	7	6700	7.32048e-06	91.1565	0.000761044	0.00818493	IPR000971:Globin, subset
mediumpurple3	SP_PIR_KEYWORDS	4	37	7	5856	7.34475e-06	90.4402	0.000145416	0.00813646	oxygen transport
mediumpurple3	PIR_SUPERFAMILY	4	22	6	2777	7.35222e-06	84.1515	7.35198e-05	0.00559558	PIRSF036518:globin
mediumpurple3	UP_SEQ_FEATURE	4	36	7	4969	1.09944e-05	78.873	0.000835228	0.0131584	metal ion-binding site:Iron (heme proximal ligand)
mediumpurple3	GOTERM_BP_FAT	4	38	11	6558	2.64487e-05	62.756	0.00394633	0.0390378	GO:0015669~gas transport
midnightblue	GOTERM_CC_FAT	23	63	443	5979	1.74149e-10	4.92734	3.04762e-08	2.13499e-07	GO:0031982~vesicle
midnightblue	GOTERM_CC_FAT	22	63	421	5979	4.80203e-10	4.95939	4.20177e-08	5.88705e-07	GO:0031410~cytoplasmic vesicle
midnightblue	GOTERM_CC_FAT	13	63	110	5979	8.20485e-10	11.216	4.78616e-08	1.00588e-06	GO:0030141~secretory granule
midnightblue	GOTERM_CC_FAT	20	63	365	5979	2.01968e-09	5.20026	8.8361e-08	2.47603e-06	GO:0016023~cytoplasmic membrane-bounded vesicle
midnightblue	GOTERM_CC_FAT	20	63	377	5979	3.47704e-09	5.03474	1.21696e-07	4.26268e-06	GO:0031988~membrane-bounded vesicle
midnightblue	GOTERM_BP_FAT	8	82	39	6558	3.77266e-07	16.4053	0.000422449	0.000604675	GO:0007631~feeding behavior
midnightblue	SP_PIR_KEYWORDS	10	84	74	5856	7.77208e-07	9.42085	0.000146881	0.000965116	cleavage on pair of basic residues
midnightblue	GOTERM_CC_FAT	10	63	117	5979	2.62572e-06	8.11152	7.65808e-05	0.00321896	GO:0044433~cytoplasmic vesicle part
midnightblue	GOTERM_BP_FAT	12	82	181	6558	1.17892e-05	5.30225	0.00658027	0.0188939	GO:0007268~synaptic transmission
midnightblue	GOTERM_CC_FAT	17	63	480	5979	1.97505e-05	3.36121	0.000493646	0.0242105	GO:0005576~extracellular region
midnightblue	GOTERM_MF_FAT	6	77	32	6416	3.20332e-05	15.6234	0.00848477	0.042012	GO:0005179~hormone activity
plum1	GOTERM_BP_FAT	8	30	81	6558	4.2278e-08	21.5901	2.27453e-05	6.15089e-05	GO:0006414~translational elongation
plum1	GOTERM_CC_FAT	9	34	153	5979	1.2351e-06	10.3443	0.000133382	0.00139071	GO:0005840~ribosome
plum1	GOTERM_CC_FAT	18	34	916	5979	1.25161e-06	3.45563	6.75845e-05	0.0014093	GO:0005829~cytosol
plum1	GOTERM_CC_FAT	7	34	72	5979	2.11498e-06	17.0968	7.61363e-05	0.00238144	GO:0033279~ribosomal subunit
plum1	GOTERM_CC_FAT	6	34	48	5979	5.40233e-06	21.9816	0.000145853	0.00608286	GO:0022626~cytosolic ribosome
plum1	KEGG_PATHWAY	7	22	80	3076	1.0187e-05	12.2341	0.000417582	0.00937439	rno03010:Ribosome
plum1	GOTERM_CC_FAT	7	34	98	5979	1.28747e-05	12.5609	0.000278057	0.014496	GO:0044445~cytosolic part
plum1	GOTERM_MF_FAT	7	30	123	6416	1.45427e-05	12.1713	0.00217904	0.017365	GO:0003735~structural constituent of ribosome
plum1	SP_PIR_KEYWORDS	7	29	122	5856	1.87105e-05	11.5862	0.00168254	0.0203528	ribosomal protein
plum1	GOTERM_CC_FAT	10	34	299	5979	2.30849e-05	5.88137	0.000415446	0.0259905	GO:0030529~ribonucleoprotein complex
red	SP_PIR_KEYWORDS	29	146	405	5856	4.5843e-07	2.87204	9.03067e-05	0.000573171	transcription regulation
red	GOTERM_BP_FAT	31	148	502	6558	4.79066e-07	2.73632	0.000628816	0.000783159	GO:0006350~transcription
red	GOTERM_BP_FAT	8	148	26	6558	1.13453e-06	13.6341	0.000744539	0.00185467	GO:0016126~sterol biosynthetic process
red	SP_PIR_KEYWORDS	29	146	442	5856	2.67824e-06	2.63162	0.000263772	0.00334853	Transcription
red	SP_PIR_KEYWORDS	8	146	27	5856	2.89491e-06	11.8843	0.000190081	0.00361943	Steroid biosynthesis
red	SP_PIR_KEYWORDS	7	146	19	5856	4.32239e-06	14.7772	0.000212855	0.00540412	sterol biosynthesis
red	GOTERM_BP_FAT	9	148	47	6558	7.90269e-06	8.48505	0.00345278	0.0129183	GO:0006694~steroid biosynthetic process
red	GOTERM_BP_FAT	45	148	1032	6558	8.83845e-06	1.93216	0.00289703	0.0144478	GO:0045449~regulation of transcription
red	GOTERM_BP_FAT	9	148	52	6558	1.72027e-05	7.66918	0.00450729	0.0281188	GO:0016125~sterol metabolic process
red	GOTERM_MF_FAT	22	146	337	6416	1.90178e-05	2.86883	0.00648306	0.0259178	GO:0003700~transcription factor activity
red	SP_PIR_KEYWORDS	23	146	339	5856	2.5404e-05	2.7213	0.00100043	0.0317578	dna-binding
red	GOTERM_BP_FAT	11	148	90	6558	2.90903e-05	5.41577	0.0063458	0.0475453	GO:0008202~steroid metabolic process
tan	SP_PIR_KEYWORDS	7	93	23	5856	1.0388e-06	19.1641	0.000197353	0.00129108	stress response
white	KEGG_PATHWAY	9	26	108	3076	1.17304e-06	9.85897	2.69795e-05	0.000929789	rno00190:Oxidative phosphorylation
white	KEGG_PATHWAY	9	26	138	3076	7.59354e-06	7.71572	8.73222e-05	0.00601876	rno05010:Alzheimer's disease
white	KEGG_PATHWAY	8	26	112	3076	1.96455e-05	8.45055	0.000150605	0.0155707	rno05012:Parkinson's disease
yellow	SP_PIR_KEYWORDS	29	158	122	5856	2.88792e-19	8.81013	6.23791e-17	3.66529e-16	ribosomal protein
yellow	SP_PIR_KEYWORDS	24	158	74	5856	3.41316e-19	12.0205	3.68621e-17	4.33191e-16	ribosome
yellow	GOTERM_MF_FAT	29	174	123	6416	5.19604e-19	8.69377	1.92254e-16	7.16521e-16	GO:0003735~structural constituent of ribosome
yellow	SP_PIR_KEYWORDS	29	158	146	5856	4.61467e-17	7.36189	3.32256e-15	5.85685e-14	ribonucleoprotein
yellow	GOTERM_CC_FAT	30	178	153	5979	2.82653e-16	6.58625	9.69225e-14	4.44089e-13	GO:0005840~ribosome
yellow	KEGG_PATHWAY	23	108	80	3076	4.80838e-15	8.18843	3.10307e-13	4.86278e-12	rno03010:Ribosome
yellow	GOTERM_BP_FAT	21	182	81	6558	2.50876e-14	9.34188	3.35969e-11	4.11116e-11	GO:0006414~translational elongation
yellow	SP_PIR_KEYWORDS	25	158	138	5856	1.07883e-13	6.71436	5.82734e-12	1.36957e-10	protein biosynthesis
yellow	GOTERM_BP_FAT	32	182	233	6558	1.20267e-13	4.94873	8.04987e-11	1.97031e-10	GO:0006412~translation
yellow	GOTERM_MF_FAT	31	174	249	6416	2.24703e-12	4.59068	4.15691e-10	3.09852e-09	GO:0005198~structural molecule activity
yellow	KEGG_PATHWAY	23	108	108	3076	4.01566e-12	6.0655	1.30509e-10	4.09277e-09	rno00190:Oxidative phosphorylation
yellow	GOTERM_CC_FAT	35	178	299	5979	4.74149e-12	3.93193	6.89894e-10	6.30669e-09	GO:0030529~ribonucleoprotein complex
yellow	KEGG_PATHWAY	20	108	112	3076	3.86955e-09	5.08598	8.38401e-08	3.94383e-06	rno05012:Parkinson's disease
yellow	GOTERM_CC_FAT	15	178	72	5979	1.58599e-08	6.99789	1.53841e-06	2.10952e-05	GO:0033279~ribosomal subunit
yellow	KEGG_PATHWAY	21	108	138	3076	2.43272e-08	4.33414	3.95316e-07	2.47942e-05	rno05010:Alzheimer's disease
yellow	SP_PIR_KEYWORDS	61	158	1145	5856	2.97288e-08	1.97455	1.28428e-06	3.77312e-05	acetylation
yellow	GOTERM_CC_FAT	61	178	1031	5979	3.9384e-08	1.98737	2.86518e-06	5.23844e-05	GO:0005739~mitochondrion
yellow	GOTERM_CC_FAT	12	178	48	5979	9.78059e-08	8.39747	5.69229e-06	0.000130091	GO:0022626~cytosolic ribosome
yellow	GOTERM_MF_FAT	13	174	65	6416	1.17235e-07	7.37471	1.44589e-05	0.000161664	GO:0015078~hydrogen ion transmembrane transporter activity
yellow	KEGG_PATHWAY	20	108	141	3076	1.91076e-07	4.03993	2.48399e-06	0.000194744	rno05016:Huntington's disease
yellow	GOTERM_MF_FAT	13	174	68	6416	1.97545e-07	7.04936	1.82727e-05	0.000272409	GO:0015077~monovalent inorganic cation transmembrane transporter activity
yellow	GOTERM_CC_FAT	10	178	36	5979	6.736e-07	9.33052	3.26691e-05	0.000895948	GO:0022627~cytosolic small ribosomal subunit
yellow	SP_PIR_KEYWORDS	29	158	385	5856	8.86057e-07	2.79178	3.18975e-05	0.00112456	mitochondrion
yellow	GOTERM_CC_FAT	10	178	44	5979	4.13471e-06	7.63407	0.000171871	0.00549941	GO:0015935~small ribosomal subunit
yellow	GOTERM_CC_FAT	14	178	98	5979	5.15911e-06	4.79856	0.000187645	0.00686188	GO:0044445~cytosolic part
yellow	GOTERM_MF_FAT	13	174	93	6416	6.28696e-06	5.15437	0.000465128	0.0086692	GO:0022890~inorganic cation transmembrane transporter activity
yellow	GOTERM_CC_FAT	7	178	19	5979	1.21761e-05	12.3752	0.000393619	0.0161941	GO:0045259~proton-transporting ATP synthase complex
yellow	GOTERM_BP_FAT	10	182	54	6558	1.38771e-05	6.67277	0.00617472	0.0227382	GO:0006119~oxidative phosphorylation
yellow	GOTERM_BP_FAT	6	182	13	6558	1.62961e-05	16.6306	0.00544031	0.0267013	GO:0042274~ribosomal small subunit biogenesis
yellow	GOTERM_CC_FAT	21	178	238	5979	2.06836e-05	2.96381	0.000601717	0.0275076	GO:0005743~mitochondrial inner membrane
yellow	GOTERM_CC_FAT	6	178	13	5979	2.28074e-05	15.503	0.000603184	0.0303317	GO:0045263~proton-transporting ATP synthase complex, coupling factor F(o)
yellow	GOTERM_BP_FAT	8	182	33	6558	2.52764e-05	8.73526	0.00674624	0.0414126	GO:0015986~ATP synthesis coupled proton transport
yellow	GOTERM_BP_FAT	8	182	33	6558	2.52764e-05	8.73526	0.00674624	0.0414126	GO:0015985~energy coupled proton transport, down electrochemical gradient
yellow	GOTERM_BP_FAT	17	182	178	6558	2.84394e-05	3.44135	0.00632671	0.0465937	GO:0006091~generation of precursor metabolites and energy

## Sheet: S3F
Cluster	Transcription factor	P	NTargInGRP	Ngrp	TotTarg	TotGene	TotList	FoldEnrich	FDR
grey60	NF-AT_TRANSFAC	3.7137e-06	6	97	125	29479	97	14.5875	0.00242505
grey60	HSF_TRANSFAC	5.3532e-05	6	97	200	29479	97	9.11722	0.0119791
grey60	STAT4_TRANSFAC	5.5034e-05	6	97	201	29479	97	9.07186	0.0119791
grey60	AR_TRANSFAC	8.4989e-05	3	97	26	29479	97	35.0662	0.0124572
grey60	AR_TRANSFAC	9.5384e-05	3	97	27	29479	97	33.7675	0.0124572
grey60	Sp3_TRANSFAC	0.00018412	11	97	900	29479	97	3.71442	0.0200384
grey60	PR_TRANSFAC	0.00060506	3	97	50	29479	97	18.2344	0.0498465
grey60	GABPA_JASPAR	0.00077315	10	97	901	29479	97	3.373	0.0498465
grey60	STAT5B_TRANSFAC	0.00078731	4	97	125	29479	97	9.72503	0.0498465
grey60	Sp1_TRANSFAC	0.00083072	8	97	600	29479	97	4.0521	0.0498465
grey60	ETF_TRANSFAC	0.00083968	8	97	601	29479	97	4.04535	0.0498465
paleturquoise	c-Myb_TRANSFAC	1.5294e-05	3	57	25	29479	57	62.0611	0.00698481
paleturquoise	Nrf-1_TRANSFAC	2.1393e-05	9	57	800	29479	57	5.81822	0.00698481
paleturquoise	NF-muE1_TRANSFAC	5.9402e-05	6	57	351	29479	57	8.84061	0.0129298
paleturquoise	GC_TRANSFAC	0.00032156	8	57	900	29479	57	4.59712	0.0424156
paleturquoise	Arnt_TRANSFAC	0.00037085	4	57	175	29479	57	11.8212	0.0424156
paleturquoise	ZF5_TRANSFAC	0.00038973	7	57	700	29479	57	5.17175	0.0424156
blue	ELK1_JASPAR	5.2869e-11	52	556	1000	29479	556	2.75703	3.45235e-08
blue	Zfx_JASPAR	3.1155e-09	42	556	800	29479	556	2.78354	1.01721e-06
blue	Elk-1_TRANSFAC	1.1473e-08	47	556	1000	29479	556	2.49193	1.87297e-06
blue	Nrf-1_TRANSFAC	1.1473e-08	47	556	1000	29479	556	2.49193	1.87297e-06
blue	E2F-1_TRANSFAC	3.2356e-08	46	556	1001	29479	556	2.43647	4.22569e-06
blue	AHRHIF_TRANSFAC	8.398e-08	45	556	1000	29479	556	2.38589	9.13982e-06
blue	ELK4_JASPAR	2.1915e-07	44	556	1000	29479	556	2.33287	1.2089e-05
blue	CAC-binding_TRANSFAC	2.2525e-07	44	556	1001	29479	556	2.33054	1.2089e-05
blue	Muscle_TRANSFAC	2.2525e-07	44	556	1001	29479	556	2.33054	1.2089e-05
blue	ZF5_TRANSFAC	2.2525e-07	44	556	1001	29479	556	2.33054	1.2089e-05
blue	GABP_TRANSFAC	2.3377e-07	41	556	900	29479	556	2.41535	1.2089e-05
blue	GABPA_JASPAR	2.4067e-07	41	556	901	29479	556	2.41266	1.2089e-05
blue	SP1_JASPAR	2.4067e-07	41	556	901	29479	556	2.41266	1.2089e-05
blue	E2F_TRANSFAC	5.5794e-07	43	556	1000	29479	556	2.27985	2.60239e-05
blue	USF_TRANSFAC	1.3853e-06	42	556	1000	29479	556	2.22683	6.03067e-05
blue	ZF5_TRANSFAC	1.8955e-06	33	556	703	29479	556	2.48884	7.73601e-05
blue	E2F-1_TRANSFAC	3.353e-06	41	556	1000	29479	556	2.17381	0.000109475
blue	E2F-1_TRANSFAC	3.353e-06	41	556	1000	29479	556	2.17381	0.000109475
blue	HIF1A::ARNT_JASPAR	3.353e-06	41	556	1000	29479	556	2.17381	0.000109475
blue	NF-muE1_TRANSFAC	3.353e-06	41	556	1000	29479	556	2.17381	0.000109475
blue	c-Myc:Max_TRANSFAC	7.9071e-06	40	556	1000	29479	556	2.12079	0.000229777
blue	E2F_TRANSFAC	8.0932e-06	40	556	1001	29479	556	2.11867	0.000229777
blue	USF2_TRANSFAC	8.0932e-06	40	556	1001	29479	556	2.11867	0.000229777
blue	Muscle_TRANSFAC	9.5613e-06	37	556	900	29479	556	2.1797	0.000255913
blue	CACCC-binding_TRANSFAC	9.7976e-06	37	556	901	29479	556	2.17728	0.000255913
blue	STAT1_TRANSFAC	1.1133e-05	34	556	800	29479	556	2.25334	0.00027961
blue	MIZF_JASPAR	1.1676e-05	25	556	500	29479	556	2.65099	0.000282386
blue	ETF_TRANSFAC	1.816e-05	39	556	1000	29479	556	2.06777	0.000423517
blue	GC_TRANSFAC	2.2551e-05	36	556	900	29479	556	2.12079	0.000507786
blue	Muscle_TRANSFAC	2.713e-05	33	556	800	29479	556	2.18707	0.00057148
blue	NRF-2_TRANSFAC	2.713e-05	33	556	800	29479	556	2.18707	0.00057148
blue	YY1_TRANSFAC	4.0454e-05	7	556	50	29479	556	7.42277	0.000709125
blue	AP-2_TRANSFAC	4.0597e-05	38	556	1000	29479	556	2.01475	0.000709125
blue	Pax5_JASPAR	4.0597e-05	38	556	1000	29479	556	2.01475	0.000709125
blue	Sp-1_TRANSFAC	4.0597e-05	38	556	1000	29479	556	2.01475	0.000709125
blue	Sp1_TRANSFAC	4.0597e-05	38	556	1000	29479	556	2.01475	0.000709125
blue	c-Ets-1(p54)_TRANSFAC	4.0597e-05	38	556	1000	29479	556	2.01475	0.000709125
blue	Sp-1_TRANSFAC	4.1466e-05	38	556	1001	29479	556	2.01274	0.000709125
blue	MZF1_1-4_JASPAR	4.2352e-05	38	556	1002	29479	556	2.01073	0.000709125
blue	AP-2_TRANSFAC	8.8295e-05	37	556	1000	29479	556	1.96173	0.00140626
blue	ATF_TRANSFAC	8.8295e-05	37	556	1000	29479	556	1.96173	0.00140626
blue	ATF6_TRANSFAC	9.1923e-05	37	556	1002	29479	556	1.95782	0.00142918
blue	E2F-1_TRANSFAC	0.00011491	34	556	900	29479	556	2.00297	0.00170288
blue	LBP-1_TRANSFAC	0.00011491	34	556	900	29479	556	2.00297	0.00170288
blue	Mafb_JASPAR	0.00011735	34	556	901	29479	556	2.00075	0.00170288
blue	E2F_TRANSFAC	0.00014649	31	556	800	29479	556	2.05452	0.00207952
blue	AP-2gamma_TRANSFAC	0.00018673	36	556	1000	29479	556	1.90871	0.00248584
blue	Rb:E2F-1:DP-1_TRANSFAC	0.00018673	36	556	1000	29479	556	1.90871	0.00248584
blue	HIF-1_TRANSFAC	0.00019034	36	556	1001	29479	556	1.90681	0.00248584
blue	Sp-1_TRANSFAC	0.00019034	36	556	1001	29479	556	1.90681	0.00248584
blue	MZF1_TRANSFAC	0.00021619	25	556	600	29479	556	2.20916	0.00276808
blue	Arnt::Ahr_JASPAR	0.00024236	22	556	500	29479	556	2.33287	0.00304348
blue	Pax-9_TRANSFAC	0.00024798	33	556	900	29479	556	1.94406	0.0030553
blue	Esrrb_JASPAR	0.00026372	25	556	608	29479	556	2.18009	0.00318906
blue	Mycn_JASPAR	0.0003241	30	556	800	29479	556	1.98824	0.00377924
blue	znf143_JASPAR	0.0003241	30	556	800	29479	556	1.98824	0.00377924
blue	AhR_TRANSFAC	0.00038381	35	556	1000	29479	556	1.85569	0.00417713
blue	E2F-1:DP-1_TRANSFAC	0.00038381	35	556	1000	29479	556	1.85569	0.00417713
blue	E2F-1_TRANSFAC	0.00038381	35	556	1000	29479	556	1.85569	0.00417713
blue	Egr-2_TRANSFAC	0.00038381	35	556	1000	29479	556	1.85569	0.00417713
blue	EGR_TRANSFAC	0.00041457	27	556	700	29479	556	2.04505	0.00443794
blue	AP-2alpha_TRANSFAC	0.00051883	32	556	900	29479	556	1.88515	0.00529369
blue	E2F_TRANSFAC	0.00051883	32	556	900	29479	556	1.88515	0.00529369
blue	TFAP2A_JASPAR	0.00051883	32	556	900	29479	556	1.88515	0.00529369
blue	Arnt_TRANSFAC	0.00053616	7	556	75	29479	556	4.94851	0.00532868
blue	CREB_TRANSFAC	0.00053858	32	556	902	29479	556	1.88097	0.00532868
blue	NF-Y_TRANSFAC	0.00058138	12	556	206	29479	556	3.08853	0.00566629
blue	c-Myc:Max_TRANSFAC	0.00063817	15	556	300	29479	556	2.65099	0.00612831
blue	E2F-4:DP-2_TRANSFAC	0.00076623	34	556	1000	29479	556	1.80267	0.00714783
blue	HIF-1_TRANSFAC	0.00076623	34	556	1000	29479	556	1.80267	0.00714783
blue	Egr-3_TRANSFAC	0.00077943	34	556	1001	29479	556	1.80087	0.00716856
blue	Myc_TRANSFAC	0.00082024	34	556	1004	29479	556	1.79549	0.00743912
blue	Arnt_JASPAR	0.00091211	26	556	700	29479	556	1.96931	0.00815901
blue	YY1_TRANSFAC	0.0010433	13	556	251	29479	556	2.74604	0.00920642
blue	STATx_TRANSFAC	0.0010816	13	556	252	29479	556	2.73515	0.00941713
blue	Myc_JASPAR	0.0011409	16	556	351	29479	556	2.41686	0.00980273
blue	STAT1_TRANSFAC	0.0011738	23	556	600	29479	556	2.03243	0.00995443
blue	E2F-4:DP-1_TRANSFAC	0.001485	33	556	1000	29479	556	1.74965	0.0121213
blue	E2F_TRANSFAC	0.001485	33	556	1000	29479	556	1.74965	0.0121213
blue	Klf4_JASPAR	0.001485	33	556	1000	29479	556	1.74965	0.0121213
blue	E4F1_TRANSFAC	0.0015335	33	556	1002	29479	556	1.74616	0.0123627
blue	ATF4_TRANSFAC	0.0017207	17	556	400	29479	556	2.25334	0.0137026
blue	E2F_TRANSFAC	0.0018286	14	556	300	29479	556	2.47426	0.0143865
blue	Churchill_TRANSFAC	0.0018793	10	556	175	29479	556	3.0297	0.0146093
blue	AP-2_TRANSFAC	0.0019317	25	556	700	29479	556	1.89356	0.0146674
blue	Spz1_TRANSFAC	0.0019317	25	556	700	29479	556	1.89356	0.0146674
blue	E2F-1:DP-2_TRANSFAC	0.0020063	25	556	702	29479	556	1.88817	0.0150588
blue	USF_TRANSFAC	0.0022465	9	556	150	29479	556	3.18119	0.0166701
blue	Zfp423_JASPAR	0.0024682	5	556	50	29479	556	5.30198	0.0179096
blue	Stra13_TRANSFAC	0.0024684	18	556	450	29479	556	2.12079	0.0179096
blue	GCM_TRANSFAC	0.0026189	22	556	601	29479	556	1.94082	0.0184786
blue	E2F_TRANSFAC	0.0027923	32	556	1000	29479	556	1.69663	0.0184786
blue	KROX_TRANSFAC	0.0027923	32	556	1000	29479	556	1.69663	0.0184786
blue	NFYA_JASPAR	0.0027923	32	556	1000	29479	556	1.69663	0.0184786
blue	NGFI-C_TRANSFAC	0.0027923	32	556	1000	29479	556	1.69663	0.0184786
blue	TFII-I_TRANSFAC	0.0027923	32	556	1000	29479	556	1.69663	0.0184786
blue	USF_TRANSFAC	0.0027923	32	556	1000	29479	556	1.69663	0.0184786
blue	CP2/LBP-1c/LSF_TRANSFAC	0.0028347	32	556	1001	29479	556	1.69494	0.0184786
blue	CRE-BP1_TRANSFAC	0.0028581	27	556	800	29479	556	1.78942	0.0184786
blue	Egr-1_TRANSFAC	0.0028581	27	556	800	29479	556	1.78942	0.0184786
blue	Sp1_TRANSFAC	0.0028581	27	556	800	29479	556	1.78942	0.0184786
blue	AhR/Arnt_TRANSFAC	0.0030032	12	556	250	29479	556	2.54495	0.0190397
blue	GR_TRANSFAC	0.0030032	12	556	250	29479	556	2.54495	0.0190397
blue	c-Myb_TRANSFAC	0.0039219	29	556	900	29479	556	1.70842	0.024625
blue	N-Myc_TRANSFAC	0.0048911	13	556	300	29479	556	2.29752	0.0302226
blue	CREB_TRANSFAC	0.0050911	31	556	1000	29479	556	1.64361	0.0302226
blue	E2F1_JASPAR	0.0050911	31	556	1000	29479	556	1.64361	0.0302226
blue	E2F_TRANSFAC	0.0050911	31	556	1000	29479	556	1.64361	0.0302226
blue	MAZR_TRANSFAC	0.0050911	31	556	1000	29479	556	1.64361	0.0302226
blue	Zic1_TRANSFAC	0.0050911	31	556	1000	29479	556	1.64361	0.0302226
blue	CCAAT_TRANSFAC	0.0055859	26	556	801	29479	556	1.72099	0.0328612
blue	CREB_TRANSFAC	0.0056438	17	556	450	29479	556	2.00297	0.0329054
blue	EBF1_JASPAR	0.007113	14	556	350	29479	556	2.12079	0.0409016
blue	AhR_TRANSFAC	0.0072032	28	556	900	29479	556	1.6495	0.0409016
blue	Pax-3_TRANSFAC	0.0072032	28	556	900	29479	556	1.6495	0.0409016
blue	Staf_TRANSFAC	0.0077848	8	556	150	29479	556	2.82772	0.0438231
blue	ATF_TRANSFAC	0.0089955	30	556	1000	29479	556	1.59059	0.0477566
blue	E2F-1_TRANSFAC	0.0089955	30	556	1000	29479	556	1.59059	0.0477566
blue	MAX_JASPAR	0.0089955	30	556	1000	29479	556	1.59059	0.0477566
blue	MAZ_TRANSFAC	0.0089955	30	556	1000	29479	556	1.59059	0.0477566
blue	R_TRANSFAC	0.0089955	30	556	1000	29479	556	1.59059	0.0477566
blue	STAT3_TRANSFAC	0.0089955	30	556	1000	29479	556	1.59059	0.0477566
blue	neural-restr.-silencer-element_TRANSFAC	0.0089955	30	556	1000	29479	556	1.59059	0.0477566
black	NF-muE1_TRANSFAC	8.9474e-06	23	241	1000	29479	241	2.81335	0.00468756
black	STAT1_TRANSFAC	2.7738e-05	22	241	1000	29479	241	2.69103	0.00468756
black	Staf_TRANSFAC	2.7738e-05	22	241	1000	29479	241	2.69103	0.00468756
black	EGR_TRANSFAC	2.8714e-05	13	241	400	29479	241	3.97538	0.00468756
black	USF_TRANSFAC	4.8153e-05	4	241	25	29479	241	19.5711	0.00628878
black	znf143_JASPAR	0.00012395	12	241	400	29479	241	3.66959	0.0134899
black	Pax5_JASPAR	0.00017055	19	241	901	29479	241	2.57943	0.0159099
black	USF_TRANSFAC	0.00019638	10	241	300	29479	241	4.07732	0.0160295
black	GABPA_JASPAR	0.0002306	20	241	1000	29479	241	2.44639	0.0167313
black	AP-2_TRANSFAC	0.00034383	17	241	800	29479	241	2.59929	0.0189784
black	Myc_TRANSFAC	0.00034383	17	241	800	29479	241	2.59929	0.0189784
black	NGFI-C_TRANSFAC	0.00034876	17	241	801	29479	241	2.59604	0.0189784
black	Arnt_JASPAR	0.00050276	11	241	401	29479	241	3.3554	0.0206077
black	Roaz_TRANSFAC	0.00054583	11	241	405	29479	241	3.32226	0.0206077
black	CP2/LBP-1c/LSF_TRANSFAC	0.0005853	6	241	125	29479	241	5.87134	0.0206077
black	E2F-1_TRANSFAC	0.00061628	19	241	1000	29479	241	2.32407	0.0206077
black	HIF1A::ARNT_JASPAR	0.00061628	19	241	1000	29479	241	2.32407	0.0206077
black	MTF-1_TRANSFAC	0.00061628	19	241	1000	29479	241	2.32407	0.0206077
black	SP1_JASPAR	0.00061628	19	241	1000	29479	241	2.32407	0.0206077
black	Muscle_TRANSFAC	0.00063117	19	241	1002	29479	241	2.31943	0.0206077
black	v-Myb_TRANSFAC	0.00074702	4	241	50	29479	241	9.78556	0.0232288
black	ELK1_JASPAR	0.00098522	16	241	801	29479	241	2.44334	0.0288522
black	USF_TRANSFAC	0.0010866	3	241	25	29479	241	14.6783	0.0288522
black	Myb_JASPAR	0.0011046	8	241	250	29479	241	3.91422	0.0288522
black	ZF5_TRANSFAC	0.0011046	8	241	250	29479	241	3.91422	0.0288522
black	Egr-2_TRANSFAC	0.0012629	17	241	900	29479	241	2.31048	0.0305435
black	GC_TRANSFAC	0.0012629	17	241	900	29479	241	2.31048	0.0305435
black	E2F_TRANSFAC	0.0015618	18	241	1000	29479	241	2.20175	0.0355547
black	ZID_TRANSFAC	0.001579	18	241	1001	29479	241	2.19955	0.0355547
black	c-Myc:Max_TRANSFAC	0.0018234	10	241	401	29479	241	3.05036	0.038409
black	p53_TRANSFAC	0.0018234	10	241	401	29479	241	3.05036	0.038409
black	E2F_TRANSFAC	0.0019953	14	241	700	29479	241	2.44639	0.0405236
black	LXR_TRANSFAC	0.0020479	14	241	702	29479	241	2.43942	0.0405236
black	CRE-BP1_TRANSFAC	0.0024866	9	241	350	29479	241	3.14536	0.0451042
black	Egr-1_TRANSFAC	0.0024866	9	241	350	29479	241	3.14536	0.0451042
black	USF1_JASPAR	0.0024866	9	241	350	29479	241	3.14536	0.0451042
black	E2_TRANSFAC	0.0029059	11	241	500	29479	241	2.69103	0.0494112
black	Nrf-1_TRANSFAC	0.0029059	11	241	500	29479	241	2.69103	0.0494112
black	Klf4_JASPAR	0.0031751	16	241	900	29479	241	2.17457	0.0494112
black	Mycn_JASPAR	0.0031751	16	241	900	29479	241	2.17457	0.0494112
black	Zfx_JASPAR	0.0032094	16	241	901	29479	241	2.17216	0.0494112
black	TRUE_JASPAR	0.0032605	6	241	175	29479	241	4.19381	0.0494112
black	ATF6_TRANSFAC	0.0033142	16	241	904	29479	241	2.16495	0.0494112
black	LXR,_TRANSFAC	0.0033631	4	241	75	29479	241	6.52371	0.0494112
black	MYB_TRANSFAC	0.0034263	8	241	300	29479	241	3.26185	0.0494112
black	USF2_TRANSFAC	0.0037108	5	241	125	29479	241	4.89278	0.0494112
black	MIZF_JASPAR	0.003746	17	241	1000	29479	241	2.07943	0.0494112
black	NRF-2_TRANSFAC	0.003746	17	241	1000	29479	241	2.07943	0.0494112
black	c-Myc/Max_TRANSFAC	0.003746	17	241	1000	29479	241	2.07943	0.0494112
black	CREBATF_TRANSFAC	0.0037834	17	241	1001	29479	241	2.07735	0.0494112
