# Supplementary material for: Genetic Influences on Brain Gene Expression in Rats Selected for Tameness and Aggression
Source: Oxford University Press journal article supplement (doi:10.1534/genetics.114.168948), 2014-09-03
Supplement: tables7.xlsx [file tables7.xlsx]

## Sheet: Sheet1
ensembl_gene_ID	gene_name	description	gene_chromosome	gene_start_Mb	gene_end_Mb	gene_start_cM	gene_end_cM	parental_microarray_pval	parental_microarray_fold_change_aggr_vs_tame	parental_microarray_fdr_10	parental_microarray_fdr_5	parental_rnaseq_pvalue	parental_rnaseq_pvalue_adjusted	parental_rnaseq_fold_change_aggr_vs_tame	tameness_correlation_F2_rho	tameness_correlation_F2_pvalue	tameness_correlation_F2_FDR0	FPKM_median
ENSRNOG00000000007	Gad1	Glutamate decarboxylase 1 [Source:UniProtKB/Swiss-Prot;Acc:P18088]	3	52.7894	52.83	44.5502	44.5808	0.431262	0.979796	0	0	0.284416	1	0.949385	-0.180638	0.0269617	0	5.99261
ENSRNOG00000000010	Cbln1	Cerebellin-1 Cerebellin [des-Ser1]-cerebellin [Source:UniProtKB/Swiss-Prot;Acc:P63182]	19	20.9413	20.9451	14.6977	14.6991	0.386476	0.860908	0	0	0.883539	1	1.18845	-0.0682929	0.40632	0	2.82275
ENSRNOG00000000014	F1LUT6_RAT		3	147.403	147.423	98.3178	98.3342	NA	NA	0	0	0.316027	1	0.88591	0.0198516	0.809461	0	2.53705
ENSRNOG00000000017	Steap1	metalloreductase STEAP1 [Source:RefSeq peptide;Acc:NP_001100099]	4	24.9626	24.9731	16.5205	16.5288	NA	NA	0	0	0.372995	1	0.569207	0.129851	0.113249	0	0.619875
ENSRNOG00000000021	Fbxl14		4	155.825	155.826	89.6008	89.6016	NA	NA	0	0	0.784063	1	1.11433	-0.139896	0.0877395	0	2.38394
ENSRNOG00000000024	B4F7C7_RAT	heme-binding protein 1 [Source:RefSeq peptide;Acc:NP_001102121]	4	172.058	172.095	101.029	101.055	0.0539068	1.07733	0	0	0.677722	1	0.935794	0.00579582	0.943883	0	3.18945
ENSRNOG00000000028	Nde1	Nuclear distribution protein nudE homolog 1 [Source:UniProtKB/Swiss-Prot;Acc:Q9ES39]	10	0.778995	0.814272	0	0	NA	NA	0	0	0.57842	1	1.2714	-0.0587084	0.475456	0	1.41847
ENSRNOG00000000029	MYH11_RAT	myosin-11 [Source:RefSeq peptide;Acc:NP_001164071]	10	0.666715	0.776052	0	0	NA	NA	0	0	0.00985276	1	0.712455	0.031285	0.703909	0	2.3878
ENSRNOG00000000033	Tmcc2	Protein Tmcc2; Similar to RIKEN cDNA 1110063G11 (Predicted) [Source:UniProtKB/TrEMBL;Acc:D3ZE26]	13	45.2473	45.2839	11.458	11.4941	NA	NA	0	0	0.562653	1	1.12658	0.159575	0.0511096	0	5.19185
ENSRNOG00000000034	Nuak2	NUAK family SNF1-like kinase 2 [Source:UniProtKB/Swiss-Prot;Acc:Q66HE5]	13	45.2056	45.2223	11.4169	11.4334	NA	NA	0	0	0.332699	1	1.15921	-0.015574	0.849969	0	1.01665
ENSRNOG00000000036	Klhdc8a	kelch domain containing 8A [Source:RefSeq peptide;Acc:NP_001094153]	13	45.1885	45.1952	11.4001	11.4067	NA	NA	0	0	0.488615	1	0.940836	0.0839931	0.306827	0	2.57939
ENSRNOG00000000040	RGD1304622		13	70.1808	70.213	31.5719	31.5966	NA	NA	0	0	0.108659	1	1.41924	-0.0921286	0.262165	0	1.41059
ENSRNOG00000000041	Slc26a1	sulfate anion transporter 1 [Source:RefSeq peptide;Acc:NP_071623]	14	1.58127	1.58687	0.40904	0.412985	NA	NA	0	0	0.714734	1	0.901816	0.0336389	0.68279	0	0.848737
ENSRNOG00000000042	Xpr1	xenotropic and polytropic retrovirus receptor 1 [Source:RefSeq peptide;Acc:NP_001099462]	13	70.2384	70.3793	31.6161	31.7241	NA	NA	0	0	0.668786	1	0.921922	-0.0970337	0.237498	0	4.23256
ENSRNOG00000000043	LOC100361089	alpha-L-iduronidase precursor [Source:RefSeq peptide;Acc:NP_001165555]	14	1.57262	1.58752	0.402953	0.41344	0.313406	0.8686	0	0	0.15872	1	0.812431	0.131618	0.108384	0	3.43549
ENSRNOG00000000044	Tmem175	Transmembrane protein 175 [Source:UniProtKB/Swiss-Prot;Acc:Q6AY05]	14	1.61453	1.63064	0.432448	0.443781	NA	NA	0	0	0.471532	1	0.929007	0.184615	0.0237209	0	3.8077
ENSRNOG00000000047	Cd82	CD82 antigen [Source:RefSeq peptide;Acc:NP_113985]	3	77.8318	77.8758	57.5327	57.5503	0.139871	1.09912	0	0	0.818614	1	1.0931	-0.143903	0.0789413	0	3.72173
ENSRNOG00000000048	Gak	cyclin-G-associated kinase [Source:RefSeq peptide;Acc:NP_112292]	14	1.63089	1.71037	0.44396	0.499892	NA	NA	0	0	0.854311	1	0.992588	-0.0186515	0.82078	0	3.87662
ENSRNOG00000000054	Abhd8	abhydrolase domain-containing protein 8 [Source:RefSeq peptide;Acc:NP_001100771]	16	18.6281	18.6349	11.9058	11.9101	0.507147	1.04024	0	0	0.419063	1	1.17429	0.0577982	0.482339	0	5.76579
ENSRNOG00000000060	Cplx1	Complexin-1 [Source:UniProtKB/Swiss-Prot;Acc:P63041]	14	1.73234	1.76317	0.515353	0.537046	0.0235003	0.949406	0	0	0.720445	1	1.05086	-0.0788302	0.337616	0	7.46694
ENSRNOG00000000062	Pcgf3	polycomb group RING finger protein 3 [Source:RefSeq peptide;Acc:NP_001100715]	14	1.78437	1.83926	0.551964	0.590592	0.656245	0.96679	0	0	0.803487	1	1.04159	-0.0494796	0.547642	0	3.70878
ENSRNOG00000000064	Atp5i	ATP synthase subunit e, mitochondrial [Source:UniProtKB/Swiss-Prot;Acc:P29419]	14	1.86734	1.86847	0.610353	0.611147	NA	NA	0	0	1	1	0.958938	-0.168994	0.0387032	0	6.51992
ENSRNOG00000000066	Fbxo28	F-box only protein 28 [Source:RefSeq peptide;Acc:NP_001100673]	13	98.3173	98.3428	51.0485	51.0668	NA	NA	0	0	0.523734	1	1.11404	-0.0603956	0.462842	0	2.88877
ENSRNOG00000000068	Ppp2r5a	serine/threonine-protein phosphatase 2A 56 kDa regulatory subunit alpha isoform [Source:RefSeq peptide;Acc:NP_001101361]	13	107.414	107.458	53.7	53.7	NA	NA	0	0	0.947035	1	1.00366	-0.170082	0.037449	0	4.18173
ENSRNOG00000000070	Dr1	Protein Dr1 [Source:UniProtKB/Swiss-Prot;Acc:Q5XI68]	14	2.00594	2.01729	0.707883	0.715871	0.707081	1.02273	0	0	0.386729	1	1.07668	-0.0274839	0.738489	0	3.95447
ENSRNOG00000000073	TMED5_RAT	Transmembrane emp24 domain-containing protein 5 [Source:UniProtKB/Swiss-Prot;Acc:Q6AXN3]	14	2.15559	2.17799	0.813196	0.828953	0.153103	1.14517	0	0	0.694794	1	0.913167	0.0492378	0.549603	0	2.90896
ENSRNOG00000000075	Mtf2	metal-response element-binding transcription factor 2 [Source:RefSeq peptide;Acc:NP_001094368]	14	2.1896	2.23266	0.837123	0.867427	0.532395	0.980427	0	0	0.808589	1	1.01641	0.100349	0.221772	0	2.71218
ENSRNOG00000000081	LOC305633	anthrax toxin receptor 2 [Source:MGI Symbol;Acc:MGI:1919164]	14	13.014	13.1075	8.45427	8.52007	NA	NA	0	0	0.515781	1	0.804707	0.0383697	0.641092	0	0.91684
ENSRNOG00000000082	Hltf	helicase-like transcription factor [Source:RefSeq peptide;Acc:NP_001099948]	2	105.202	105.262	60.8766	60.8961	0.0233963	1.082	0	0	0.478708	1	1.09641	-0.132219	0.106768	0	3.03178
ENSRNOG00000000091	Smad9	Mothers against decapentaplegic homolog 9 [Source:UniProtKB/Swiss-Prot;Acc:O54835]	2	144.014	144.031	77.2066	77.214	NA	NA	0	0	0.68701	1	1.07612	-0.0419521	0.610239	0	1.15341
ENSRNOG00000000095	F1LTD0_RAT	G protein-coupled receptor 89 [Source:RefSeq peptide;Acc:NP_001132958]	2	191.676	191.7	95.0572	95.0653	0.503579	1.03624	0	0	0.634458	1	1.0786	-0.0796338	0.332699	0	3.63122
ENSRNOG00000000096	NHRF3_RAT	Na(+)/H(+) exchange regulatory cofactor NHE-RF3 [Source:UniProtKB/Swiss-Prot;Acc:Q9JJ40]	2	191.66	191.676	95.0516	95.0571	NA	NA	0	0	0.69539	1	1.04726	0.0459825	0.57633	0	1.85116
ENSRNOG00000000098	Zfp364	RING finger protein 115 [Source:RefSeq peptide;Acc:NP_001102030]	2	191.528	191.597	95.0076	95.0306	NA	NA	0	0	0.806919	1	1.03549	-0.0889178	0.27923	0	4.09746
ENSRNOG00000000104	Thoc3	THO complex subunit 3 [Source:RefSeq peptide;Acc:NP_001099529]	17	16.2339	16.243	0	0	NA	NA	0	0	0.592768	1	0.957289	0.0482262	0.557843	0	3.11165
ENSRNOG00000000105	Cplx2	Complexin-2 [Source:UniProtKB/Swiss-Prot;Acc:P84087]	17	16.3146	16.3229	0	0	0.955058	1.00465	0	0	0.277296	1	1.10018	0.118142	0.1499	0	7.38643
ENSRNOG00000000108	Aga	N(4)-(Beta-N-acetylglucosaminyl)-L-asparaginase Glycosylasparaginase alpha chain Glycosylasparaginase beta chain [Source:UniProtKB/Swiss-Prot;Acc:P30919]	16	41.3835	41.3954	21.6778	21.6804	0.356535	0.939159	0	0	0.921841	1	0.965218	-0.00157518	0.984737	0	3.32458
ENSRNOG00000000111	RGD1565675	cooperator of PRMT5 [Source:RefSeq peptide;Acc:NP_001162592]	16	80.557	80.5621	56.3828	56.388	0.771557	1.01973	0	0	0.582372	1	0.930085	0.0740656	0.367714	0	4.35031
ENSRNOG00000000112	Zfp828	zinc finger protein 828 [Source:RefSeq peptide;Acc:NP_001100799]	16	80.5713	80.5737	56.3972	56.3997	NA	NA	0	0	0.523047	1	0.920215	-0.0333491	0.685377	0	3.15993
ENSRNOG00000000113	Elac1	zinc phosphodiesterase ELAC protein 1 [Source:RefSeq peptide;Acc:NP_001100876]	18	70.5127	70.5301	48.7213	48.7432	NA	NA	0	0	0.590474	1	0.932801	0.0355892	0.665475	0	2.48155
ENSRNOG00000000120	Tceb1	NA	5	1.96061	1.9759	0.462007	0.469363	NA	NA	0	0	0.752536	1	0.994951	0.00624384	0.939553	0	4.42911
ENSRNOG00000000121	Pigv	GPI mannosyltransferase 2 [Source:UniProtKB/Swiss-Prot;Acc:Q5KR61]	5	151.405	151.417	92.4683	92.4807	NA	NA	0	0	0.412805	1	0.833579	-0.0413103	0.615718	0	1.20723
ENSRNOG00000000122	KAD2_RAT	Adenylate kinase 2, mitochondrial [Source:UniProtKB/Swiss-Prot;Acc:P29410]	5	148.157	148.176	89.0643	89.0847	0.171007	0.930891	0	0	0.761184	1	1.0528	-0.147299	0.0720548	0	2.42165
ENSRNOG00000000123	Rnf19b	E3 ubiquitin-protein ligase RNF19B [Source:RefSeq peptide;Acc:NP_001101473]	5	148.218	148.243	89.1288	89.1551	NA	NA	0	0	1	1	1.00976	-0.215523	0.00807962	0	3.36152
ENSRNOG00000000127	F1LT58_RAT	importin subunit alpha-7 [Source:RefSeq peptide;Acc:NP_001015029]	5	148.784	148.794	89.7212	89.7317	NA	NA	0	0	0.86754	1	0.918671	-0.138518	0.0909394	0	3.65349
ENSRNOG00000000129	RGD1559864	Protein RGD1559864 [Source:UniProtKB/TrEMBL;Acc:D3ZB78]	5	59.4218	59.4278	38.0531	38.0567	NA	NA	0	0	0.435019	1	1.11186	0.204199	0.0121944	0	5.52557
ENSRNOG00000000130	Dnajb5	dnaJ homolog subfamily B member 5 [Source:RefSeq peptide;Acc:NP_001101474]	5	59.438	59.4466	38.0628	38.068	0.515432	1.03516	0	0	0.958798	1	1.02253	-0.148382	0.0699644	0	5.29976
ENSRNOG00000000133	Txndc15	Thioredoxin domain-containing protein 15 [Source:UniProtKB/Swiss-Prot;Acc:Q5BJT4]	17	14.9383	14.9508	0	0	0.0952404	1.02203	0	0	0.7655	1	1.0143	-0.0892432	0.277467	0	4.74022
ENSRNOG00000000137	Ly86	lymphocyte antigen 86 [Source:RefSeq peptide;Acc:NP_001099598]	17	33.6677	33.7681	13.6328	13.7409	NA	NA	0	0	0.32245	1	1.48747	-0.0182355	0.824712	0	0.970761
ENSRNOG00000000142	Plxdc2	plexin domain-containing protein 2 precursor [Source:RefSeq peptide;Acc:NP_001101892]	17	90.5724	90.9821	57.64	57.937	NA	NA	0	0	0.949186	1	0.998244	0.00202676	0.980362	0	3.261
ENSRNOG00000000145	Pik3r3	phosphatidylinositol 3-kinase regulatory subunit gamma [Source:RefSeq peptide;Acc:NP_071549]	5	136.497	136.566	79.7131	79.7447	0.860463	1.0121	0	0	0.0840069	1	1.32075	-0.0501356	0.542339	0	3.32795
ENSRNOG00000000146	Nebl	Protein Nebl [Source:UniProtKB/TrEMBL;Acc:D4A164]	17	91.5189	91.6269	58.3262	58.4045	NA	NA	0	0	0.839113	1	0.948902	0.190638	0.0194512	0	3.73482
ENSRNOG00000000147	Mast2	microtubule-associated serine/threonine-protein kinase 2 [Source:RefSeq peptide;Acc:NP_001101475]	5	136.574	136.717	79.7479	79.8137	0.675848	0.981884	0	0	0.763325	1	1.03098	-0.0908112	0.269079	0	4.40275
ENSRNOG00000000150	LOC100364233	Uncharacterized protein [Source:UniProtKB/TrEMBL;Acc:F1LVX1]	17	92.3959	92.5522	58.962	59.0753	0.472657	1.04986	0	0	0.34302	1	1.11635	-0.0161198	0.844776	0	2.07264
ENSRNOG00000000151	Ldlrap1	low density lipoprotein receptor adapter protein 1 [Source:RefSeq peptide;Acc:NP_001102741]	5	153.505	153.528	94.6688	94.6928	NA	NA	0	0	0.814777	1	1.16921	-0.033694	0.682298	0	2.56988
ENSRNOG00000000155	Cog3	conserved oligomeric Golgi complex subunit 3 [Source:RefSeq peptide;Acc:NP_001012157]	15	56.6008	56.648	31.8385	31.8808	NA	NA	0	0	0.226648	1	0.827774	-0.00905997	0.912381	0	2.82154
ENSRNOG00000000156	Megf6	multiple epidermal growth factor-like domains protein 6 precursor [Source:RefSeq peptide;Acc:NP_075244]	5	171.018	171.05	113.023	113.057	NA	NA	0	0	0.60089	1	1.18324	0.170662	0.036795	0	0.765146
ENSRNOG00000000157	Atg12	Ubiquitin-like protein ATG12 [Source:UniProtKB/Swiss-Prot;Acc:Q2TBJ5]	18	40.9338	40.944	20.3735	20.3761	0.0287387	0.904051	0	0	0.530491	1	0.857843	0.14033	0.0867508	0	4.12576
ENSRNOG00000000158	Cdo1	Cysteine dioxygenase type 1 [Source:UniProtKB/Swiss-Prot;Acc:P21816]	18	40.914	40.9287	20.3683	20.3721	0.0236261	0.972113	0	0	0.434433	1	1.08471	0.061649	0.453592	0	4.39123
ENSRNOG00000000161	Chm	rab proteins geranylgeranyltransferase component A 1 [Source:RefSeq peptide;Acc:NP_058763]	X	101.754	101.928	NA	NA	0.657038	0.970697	0	0	0.535875	1	1.08659	0.111914	0.172729	0	2.94845
ENSRNOG00000000164	Lamp2	lysosome-associated membrane glycoprotein 2 precursor [Source:RefSeq peptide;Acc:NP_058764]	X	6.90829	6.95177	NA	NA	0.121257	1.16833	0	0	0.922163	1	0.979114	0.0756337	0.357631	0	4.9758
ENSRNOG00000000166	D3ZAQ7_RAT	uncharacterized protein LOC317628 [Source:RefSeq peptide;Acc:NP_001073361]	X	39.8118	39.8323	NA	NA	NA	NA	0	0	0.443477	1	1.19279	0.053462	0.515847	0	1.38798
ENSRNOG00000000167	F1LVW9_RAT	5-aminolevulinate synthase, erythroid-specific, mitochondrial [Source:RefSeq peptide;Acc:NP_037329]	X	39.8005	39.8105	NA	NA	0.219502	1.14582	0	0	0.367668	1	1.17448	-0.117236	0.153074	0	0.925218
ENSRNOG00000000168	Gatm	Glycine amidinotransferase, mitochondrial [Source:UniProtKB/Swiss-Prot;Acc:P50442]	3	109.558	109.565	70.2232	70.2262	NA	NA	0	0	0.983046	1	0.983086	0.0336993	0.68225	0	4.58137
ENSRNOG00000000169	Spata5l1	spermatogenesis-associated protein 5-like protein 1 [Source:RefSeq peptide;Acc:NP_001103117]	3	109.585	109.598	70.2339	70.2391	NA	NA	0	0	0.640555	1	1.13891	0.0444767	0.588896	0	0.898972
ENSRNOG00000000170	Slc30a4	zinc transporter 4 [Source:RefSeq peptide;Acc:NP_742063]	3	109.644	109.666	70.2575	70.2663	0.422813	1.04588	0	0	0.900803	1	0.961439	-0.146216	0.0741956	0	4.27258
ENSRNOG00000000172	Sqrdl	sulfide:quinone oxidoreductase, mitochondrial [Source:RefSeq peptide;Acc:NP_001041378]	3	109.567	109.752	70.2268	70.3009	0.774631	0.98908	0	0	1	1	0.964341	-0.140783	0.0857272	0	1.69358
ENSRNOG00000000175	Mier2	mesoderm induction early response protein 2 [Source:RefSeq peptide;Acc:NP_001102207]	7	11.6712	11.6877	1.98797	1.99136	NA	NA	0	0	0.654779	1	1.10364	0.0851434	0.300226	0	2.95929
ENSRNOG00000000177	Ppap2c	Lipid phosphate phosphohydrolase 2 [Source:UniProtKB/Swiss-Prot;Acc:Q8K593]	7	11.6943	11.7023	1.99271	1.99437	0.0402449	1.13707	0	0	0.87195	1	1.06212	0.0502441	0.541465	0	1.62469
ENSRNOG00000000185	Mpst	3-mercaptopyruvate sulfurtransferase [Source:UniProtKB/Swiss-Prot;Acc:P97532]	7	116.359	116.364	83.9179	83.9226	0.97999	0.996899	0	0	0.92465	1	1.04934	0.125193	0.12689	0	2.73301
ENSRNOG00000000186	Tst	Thiosulfate sulfurtransferase [Source:UniProtKB/Swiss-Prot;Acc:P24329]	7	116.35	116.356	83.9082	83.9145	0.205331	0.944732	0	0	0.933685	1	1.02267	-0.119253	0.146078	0	4.32914
ENSRNOG00000000190	F1LPY5_RAT	E1A binding protein p300 [Source:MGI Symbol;Acc:MGI:1276116]	7	119.939	120.008	87.4282	87.4961	NA	NA	0	0	0.950726	1	1.00573	-0.102442	0.212236	0	3.17522
ENSRNOG00000000195	Vwa5a		8	40.8502	40.8745	33.5886	33.6097	NA	NA	0	0	0.507612	1	0.873161	0.0451185	0.583525	0	1.51791
ENSRNOG00000000204	Syncrip	Heterogeneous nuclear ribonucleoprotein Q [Source:UniProtKB/Swiss-Prot;Acc:Q7TP47]	8	93.7281	93.757	66.5054	66.526	NA	NA	0	0	0.436663	1	1.03642	-0.0646892	0.43159	0	4.72753
ENSRNOG00000000207	LOC100365314		6	26.9134	26.9142	17.1307	17.1313	NA	NA	0	0	1	1	0.924312	0.0457159	0.578546	0	3.78734
ENSRNOG00000000216	Klf11	Krueppel-like factor 11 [Source:RefSeq peptide;Acc:NP_001032431]	6	42.2962	42.3079	29.5835	29.5934	NA	NA	0	0	0.567126	1	0.901667	0.0208169	0.800385	0	1.56803
ENSRNOG00000000217	LOC100365881		6	90.9508	90.9605	56.8311	56.8349	NA	NA	0	0	0.462044	1	1.15166	0.0934976	0.255111	0	0.96692
ENSRNOG00000000219	Ano10	Anoctamin [Source:UniProtKB/TrEMBL;Acc:D3ZF54]	8	122.003	122.096	94.2359	94.3077	NA	NA	0	0	0.580368	1	0.96486	-0.109532	0.182111	0	3.1921
ENSRNOG00000000221	Abhd5	1-acylglycerol-3-phosphate O-acyltransferase ABHD5 [Source:UniProtKB/Swiss-Prot;Acc:Q6QA69]	8	122.149	122.173	94.3491	94.3682	0.0265884	0.929504	0	0	0.884339	1	1.00665	0.0732104	0.373286	0	2.47876
ENSRNOG00000000230	Lmf1	Protein Lmf1 [Source:UniProtKB/TrEMBL;Acc:F1M5Z6]	10	14.8319	14.9184	8.96092	9.03246	NA	NA	0	0	0.629808	1	0.941304	0.0142673	0.862427	0	2.69101
ENSRNOG00000000231	Kctd17	BTB/POZ domain-containing protein KCTD17 [Source:RefSeq peptide;Acc:NP_001128001]	7	116.38	116.391	83.9379	83.9484	0.62668	1.02852	0	0	0.840352	1	1.04395	0.10827	0.187231	0	5.06689
ENSRNOG00000000236	Zfp207	zinc finger protein 207 [Source:RefSeq peptide;Acc:NP_001034109]	10	68.6134	68.6252	57.7727	57.7816	NA	NA	0	0	0.803632	1	0.960721	-0.0595654	0.469026	0	5.03904
ENSRNOG00000000237	RGD1310429	uncharacterized protein LOC303764 [Source:RefSeq peptide;Acc:NP_001132978]	10	68.5867	68.6006	57.7523	57.7628	0.0844436	1.14898	0	0	0.956563	1	0.99787	-0.0422615	0.607605	0	3.82669
ENSRNOG00000000242	Synrg	synergin, gamma [Source:MGI Symbol;Acc:MGI:1354742]	10	72.2477	72.33	60.5493	60.6121	0.496171	0.96134	0	0	0.949512	1	1.0088	-0.0911757	0.267154	0	3.60109
ENSRNOG00000000244	Coil	coilin [Source:RefSeq peptide;Acc:NP_059056]	10	77.4358	77.4449	64.513	64.5199	NA	NA	0	0	0.813521	1	0.937205	0.0640491	0.436171	0	2.25068
ENSRNOG00000000245	Slc16a6	monocarboxylate transporter 7 [Source:RefSeq peptide;Acc:NP_942055]	10	98.8528	98.8752	86.7233	86.7502	0.396011	1.10169	0	0	0.282081	1	1.29426	-0.048916	0.552218	0	1.89251
ENSRNOG00000000246	AMZ2_RAT	Archaemetzincin-2 [Source:UniProtKB/Swiss-Prot;Acc:Q400C7]	10	98.8893	98.8998	86.7672	86.7798	0.330394	0.969208	0	0	0.712152	1	0.968379	-0.00964666	0.906732	0	4.44668
ENSRNOG00000000247	D4A9F2_RAT	UNC93-like protein MFSD11 [Source:RefSeq peptide;Acc:NP_001101778]	10	106.957	106.972	95.3	95.3	NA	NA	0	0	0.910031	1	0.97527	-0.114866	0.161609	0	2.56319
ENSRNOG00000000248	Sfrs2	Serine/arginine-rich splicing factor 2 [Source:UniProtKB/Swiss-Prot;Acc:Q6PDU1]	10	106.954	106.957	95.3	95.3	0.259346	1.04133	0	0	0.299034	1	1.22486	0.0644065	0.43361	0	5.19302
ENSRNOG00000000249	RGD1306284	Methyltransferase-like protein 23 [Source:UniProtKB/Swiss-Prot;Acc:Q5RJL2]	10	106.949	106.953	95.3	95.3	0.881458	0.998362	0	0	0.488318	1	0.844989	0.0143829	0.861324	0	2.46581
ENSRNOG00000000250	D3ZC32_RAT	Bifunctional arginine demethylase and lysyl-hydroxylase JMJD6 [Source:UniProtKB/Swiss-Prot;Acc:Q6AYK2]	10	106.943	106.949	95.3	95.3	NA	NA	0	0	0.395847	1	1.16131	-0.102133	0.213627	0	2.25088
ENSRNOG00000000257	Smpd3	sphingomyelin phosphodiesterase 3 [Source:RefSeq peptide;Acc:NP_446057]	19	36.1122	36.1956	32.5636	32.706	0.455302	0.953667	0	0	0.847797	1	1.04671	0.0800001	0.330473	0	3.65109
ENSRNOG00000000258	Prmt7	Protein arginine N-methyltransferase 7 [Source:UniProtKB/Swiss-Prot;Acc:Q5U4E8]	19	36.0598	36.1114	32.4742	32.5622	0.947039	0.99635	0	0	0.477695	1	0.916507	0.0530193	0.519334	0	3.09998
ENSRNOG00000000262	D3ZEI3_RAT	zinc finger protein 821 [Source:MGI Symbol;Acc:MGI:1923121]	19	39.586	39.6042	38.4968	38.528	0.620494	0.982276	0	0	0.860308	1	0.981495	0.0300991	0.714636	0	3.14565
ENSRNOG00000000264	Def8	Differentially expressed in FDCP 8 homolog [Source:UniProtKB/Swiss-Prot;Acc:Q4V8I4]	19	53.765	53.7813	62.1122	62.1344	0.533447	0.974233	0	0	0.698208	1	0.980057	0.077536	0.345633	0	3.04031
ENSRNOG00000000274	Phyhipl	Phytanoyl-CoA hydroxylase-interacting protein-like [Source:UniProtKB/Swiss-Prot;Acc:Q6AYN4]	20	18.8088	18.8494	11.3522	11.3899	NA	NA	0	0	0.77836	1	0.96265	-0.248742	0.00214518	0	6.11793
ENSRNOG00000000275	D3ZD52_RAT	family with sequence similarity 13, member C [Source:MGI Symbol;Acc:MGI:1918971]	20	18.8508	18.9775	11.3912	11.509	NA	NA	0	0	0.00942884	1	1.43899	-0.0933056	0.256093	0	3.56728
ENSRNOG00000000277	Tet1	tet methylcytosine dioxygenase 1 [Source:MGI Symbol;Acc:MGI:1098693]	20	25.1312	25.1592	17.232	17.258	NA	NA	0	0	0.572303	1	0.843502	-0.0229788	0.780157	0	0.978754
ENSRNOG00000000279	Rtn4ip1	reticulon 4 interacting protein 1 [Source:RefSeq peptide;Acc:NP_001101114]	20	47.8185	47.8577	42.0778	42.1218	0.0162869	1.31204	0	0	0.0940491	1	1.29712	-0.0903081	0.271751	0	2.15641
ENSRNOG00000000281	Prodh	proline dehydrogenase, mitochondrial [Source:RefSeq peptide;Acc:NP_001129250]	11	84.9051	84.9222	55.4	55.4	0.532479	1.02809	0	0	0.958958	1	0.993108	0.104849	0.201632	0	4.09746
ENSRNOG00000000283	Dgcr14	protein DGCR14 [Source:RefSeq peptide;Acc:NP_001012490]	11	85.0641	85.073	55.4	55.4	NA	NA	0	0	0.788154	1	0.976731	-0.0714219	0.385105	0	2.6965
ENSRNOG00000000288	Scarf2	scavenger receptor class F member 2 precursor [Source:RefSeq peptide;Acc:NP_001099334]	11	85.1644	85.1757	55.4	55.4	NA	NA	0	0	0.530943	1	1.16306	0.0655479	0.425488	0	1.78906
ENSRNOG00000000299	Foxo3	forkhead box protein O3 [Source:RefSeq peptide;Acc:NP_001099865]	20	46.1718	46.2628	40.2351	40.337	NA	NA	0	0	0.414849	1	1.16323	0.0450314	0.584253	0	3.26359
ENSRNOG00000000302	Sesn1	sestrin-1 [Source:RefSeq peptide;Acc:NP_001099866]	20	45.7866	45.8779	39.8041	39.9062	0.169455	0.929813	0	0	0.85926	1	0.961443	-0.00354149	0.965692	0	3.98049
ENSRNOG00000000303	RGD1311358	Centrosomal protein CEP57L1 [Source:UniProtKB/Swiss-Prot;Acc:Q6AXZ4]	20	45.7304	45.7859	39.7411	39.8033	NA	NA	0	0	0.82981	1	0.901045	0.012525	0.879091	0	1.54444
ENSRNOG00000000304	Cd164	Sialomucin core protein 24 [Source:UniProtKB/Swiss-Prot;Acc:Q9QX82]	20	45.4866	45.4982	39.4683	39.4813	0.970184	1.00114	0	0	0.472727	1	1.06734	-0.124358	0.129465	0	5.06854
ENSRNOG00000000306	Smpd2	Sphingomyelin phosphodiesterase 2 [Source:UniProtKB/Swiss-Prot;Acc:Q9ET64]	20	45.4488	45.4519	39.426	39.4295	NA	NA	0	0	0.747615	1	1.03203	-0.00406774	0.960598	0	2.17515
ENSRNOG00000000307	Mical1	Protein-methionine sulfoxide oxidase MICAL1 [Source:UniProtKB/Swiss-Prot;Acc:D3ZBP4]	20	45.4367	45.4486	39.4125	39.4259	NA	NA	0	0	0.873984	1	0.954344	-0.132818	0.105175	0	1.12689
ENSRNOG00000000308	Zbtb24	Zinc finger and BTB domain-containing protein 24 [Source:UniProtKB/Swiss-Prot;Acc:Q3B725]	20	45.4096	45.4265	39.3821	39.4011	0.886525	0.997164	0	0	0.812093	1	0.94734	-0.0859132	0.295861	0	1.58567
ENSRNOG00000000312	Fig4	polyphosphoinositide phosphatase [Source:RefSeq peptide;Acc:NP_001040561]	20	45.1234	45.2488	39.0618	39.2022	0.654202	0.970031	0	0	1	1	1.03182	-0.145859	0.0749133	0	3.69007
ENSRNOG00000000314	Sec63	translocation protein SEC63 homolog [Source:RefSeq peptide;Acc:NP_001101107]	20	46.6691	46.7381	40.7916	40.8688	0.321718	1.03662	0	0	0.950575	1	0.995125	0.121842	0.137462	0	3.89796
ENSRNOG00000000316	D3ZBN6_RAT	Sine oculis-binding protein homolog [Source:UniProtKB/Swiss-Prot;Acc:A7XYI6]	20	46.9185	47.0798	41.0707	41.2512	NA	NA	0	0	0.70102	1	1.00515	-0.0787716	0.337977	0	4.21597
ENSRNOG00000000321	Cd24	Signal transducer CD24 [Source:UniProtKB/Swiss-Prot;Acc:Q07490]	20	47.5024	47.5077	41.7241	41.73	0.815218	1.01558	0	0	0.451131	1	0.845968	-0.063498	0.440137	0	4.04317
ENSRNOG00000000322	Atg5	autophagy protein 5 [Source:RefSeq peptide;Acc:NP_001014272]	20	48.291	48.3667	42.6066	42.6913	0.784968	1.02126	0	0	0.300311	1	1.16558	-0.0567226	0.49054	0	2.97042
ENSRNOG00000000325	Prep	NA	20	49.0249	49.1447	43.4	43.4	0.231046	0.912833	0	0	0.947734	1	1.01754	0.190005	0.0198661	0	3.13314
ENSRNOG00000000327	Hace1	E3 ubiquitin-protein ligase HACE1 [Source:UniProtKB/Swiss-Prot;Acc:D3ZBM7]	20	49.856	49.9731	43.4	43.4	0.376839	1.06387	0	0	0.448234	1	0.906615	-0.0836678	0.308711	0	3.58918
ENSRNOG00000000340	RGD1304704	uncharacterized protein LOC302247 [Source:RefSeq peptide;Acc:NP_001041339]	15	4.79046	4.80091	0	0	0.985461	1.00215	0	0	0.597584	1	1.01585	-0.129009	0.115629	0	4.90459
ENSRNOG00000000341	Nid2	Nidogen-2 [Source:UniProtKB/Swiss-Prot;Acc:B5DFC9]	15	4.80118	4.85689	0	0	NA	NA	0	0	0.867047	1	1.0166	-0.0374097	0.649469	0	0.817205
ENSRNOG00000000368	GRIK2_RAT	glutamate receptor, ionotropic kainate 2 precursor [Source:RefSeq peptide;Acc:NP_062182]	20	53.23	53.7131	43.4	43.4	0.111112	1.13989	0	0	1	1	0.968956	0.0327962	0.690323	0	3.64838
ENSRNOG00000000373	LOC100362857		20	24.6362	24.7637	16.7717	16.8903	NA	NA	0	0	0.569951	1	0.761554	0.0185555	0.821687	0	1.30402
ENSRNOG00000000378	B2RYN9_RAT	RGD1562230 protein; Uncharacterized protein [Source:UniProtKB/TrEMBL;Acc:B2RYN9]	20	25.9009	25.9785	17.9479	18.02	NA	NA	0	0	0.979661	1	1.08606	0.0833389	0.310623	0	2.94135
ENSRNOG00000000379	Dnajc12	DnaJ homolog subfamily C member 12 [Source:UniProtKB/Swiss-Prot;Acc:Q925T0]	20	25.7297	25.7514	17.7886	17.8088	0.591029	0.981652	0	0	0.762688	1	0.981124	0.177594	0.0296909	0	3.18918
ENSRNOG00000000380	D4A0K3_RAT	Uncharacterized protein [Source:UniProtKB/TrEMBL;Acc:F1LTP2]	20	25.668	25.6882	17.7313	17.7501	NA	NA	0	0	1	1	0.916846	-0.185959	0.0227041	0	2.55074
ENSRNOG00000000381	Herc4	Probable E3 ubiquitin-protein ligase HERC4 [Source:UniProtKB/Swiss-Prot;Acc:Q5PQN1]	20	25.5918	25.6656	17.6603	17.729	0.094617	1.10063	0	0	0.810122	1	1.02482	-0.0206534	0.801921	0	2.61051
ENSRNOG00000000384	Atoh7	atonal homolog 7 [Source:RefSeq peptide;Acc:NP_001163953]	20	25.4483	25.4487	17.5269	17.5273	NA	NA	0	0	0.757079	1	1.2612	-0.0453389	0.581685	0	0.607694
ENSRNOG00000000386	Pbld	Phenazine biosynthesis-like domain-containing protein [Source:UniProtKB/Swiss-Prot;Acc:Q68G31]	20	25.414	25.4283	17.495	17.5083	NA	NA	0	0	0.170032	1	1.49004	-0.0488822	0.552492	0	1.56167
ENSRNOG00000000387	Slc25a16	graves disease carrier protein [Source:RefSeq peptide;Acc:NP_001094330]	20	25.2591	25.2873	17.351	17.3772	0.522506	0.965261	0	0	0.662761	1	0.918492	-0.117625	0.151705	0	3.20525
ENSRNOG00000000389	Dna2	DNA replication ATP-dependent helicase/nuclease DNA2 DNA replication nuclease DNA2 DNA replication ATP-dependent helicase DNA2 [Source:UniProtKB/Swiss-Prot;Acc:D3ZG52]	20	25.2883	25.3169	17.3782	17.4047	NA	NA	0	0	0.967274	1	1.00814	-0.0348798	0.671753	0	1.12924
ENSRNOG00000000390	Rufy2	RUN and FYVE domain-containing protein 2 [Source:RefSeq peptide;Acc:NP_001162058]	20	25.3207	25.3501	17.4083	17.4356	NA	NA	0	0	0.815812	1	0.967807	0.0392747	0.633238	0	3.78993
ENSRNOG00000000392	Supv3l1	ATP-dependent RNA helicase SUPV3L1, mitochondrial precursor [Source:RefSeq peptide;Acc:NP_001012480]	20	29.6814	29.7007	21.7816	21.8031	0.643657	0.980515	0	0	0.702045	1	0.985966	0.000359127	0.99652	0	2.93476
ENSRNOG00000000394	Srgn	Serglycin [Source:UniProtKB/Swiss-Prot;Acc:P04917]	20	29.7467	29.7611	21.8547	21.8707	0.89248	1.00668	0	0	0.703727	1	0.844474	0.102648	0.211312	0	3.03204
ENSRNOG00000000395	LOC606294	RIKEN cDNA 2510003E04 gene [Source:MGI Symbol;Acc:MGI:1919570]	20	29.8173	29.8368	21.9336	21.9555	0.272562	0.969421	0	0	0.56778	1	1.03614	-0.0131917	0.872708	0	5.25566
ENSRNOG00000000396	Ddx50	DEAD (Asp-Glu-Ala-Asp) box polypeptide 50 [Source:RefSeq peptide;Acc:NP_001013216]	20	29.868	29.8973	21.9903	22.0231	0.345563	1.05163	0	0	0.757624	1	0.972907	-0.11008	0.179922	0	3.62552
ENSRNOG00000000397	Ccar1	cell division cycle and apoptosis regulator protein 1 [Source:RefSeq peptide;Acc:NP_001102005]	20	29.997	30.0396	22.1347	22.1824	0.441218	1.05686	0	0	0.530362	1	1.02674	0.0391769	0.634084	0	3.84119
ENSRNOG00000000398	Zufsp	Zinc finger with UFM1-specific peptidase domain protein [Source:UniProtKB/Swiss-Prot;Acc:Q5U2S3]	20	30.0961	30.1262	22.2456	22.2793	0.0141859	0.872676	0	0	0.0391122	1	0.618008	-0.189843	0.0199734	0	2.39874
ENSRNOG00000000399	Kpna1	importin subunit alpha-1 [Source:RefSeq peptide;Acc:NP_942021]	11	66.5526	66.596	46.3895	46.4257	0.991312	1.00047	0	0	0.995819	1	0.949328	0.00426686	0.958671	0	4.54292
ENSRNOG00000000404			20	30.7067	30.7077	22.9289	22.93	NA	NA	0	0	0.347112	1	0.894671	-0.152674	0.0621576	0	1.04131
ENSRNOG00000000407	Dcbld1	Protein Dcbld1; RCG22100 [Source:UniProtKB/TrEMBL;Acc:D3ZFM7]	20	30.9458	31.038	23.1965	23.2996	NA	NA	0	0	0.337199	1	0.818728	0.0756745	0.35737	0	1.137
ENSRNOG00000000408	Gopc	golgi associated PDZ and coiled-coil motif containing [Source:RefSeq peptide;Acc:NP_001101101]	20	31.0553	31.1055	23.319	23.3752	0.27815	0.953372	0	0	0.882907	1	0.946285	-0.0156043	0.849681	0	4.24913
ENSRNOG00000000411	Nus1	nuclear undecaprenyl pyrophosphate synthase 1 [Source:RefSeq peptide;Acc:NP_001157629]	20	31.144	31.1682	23.4183	23.4454	0.947138	1.01394	0	0	0.986373	1	0.973574	0.0769457	0.349328	0	4.15521
ENSRNOG00000000412	Slc35f1	solute carrier family 35 member F1 [Source:RefSeq peptide;Acc:NP_001102808]	20	31.6219	31.7701	23.953	24.1189	0.391779	1.06226	0	0	0.569143	1	1.11542	0.0174301	0.832337	0	4.60234
ENSRNOG00000000413	Pln	Cardiac phospholamban [Source:UniProtKB/Swiss-Prot;Acc:P61016]	20	32.0004	32.0084	24.3766	24.3855	NA	NA	0	0	0.383313	1	0.748639	-0.0447167	0.586885	0	1.23388
ENSRNOG00000000414	LOC100361627	centrosomal protein 85-like [Source:MGI Symbol;Acc:MGI:3642684]	20	31.9435	32.047	24.3129	24.4288	NA	NA	0	0	0.599926	1	1.12564	0.11257	0.17021	0	1.86278
ENSRNOG00000000415	Asf1a	ASF1 anti-silencing function 1 homolog A [Source:RefSeq peptide;Acc:NP_001099859]	20	32.2616	32.2765	24.669	24.6856	0.153089	0.966032	0	0	0.916347	1	0.964953	0.0154211	0.851425	0	2.70107
ENSRNOG00000000417	F1LW91_RAT	nuclear mitotic apparatus protein 1 [Source:RefSeq peptide;Acc:NP_001094161]	1	159.436	159.471	99.4231	99.439	0.492591	1.0222	0	0	0.470507	1	1.09664	0.0208009	0.800535	0	3.88617
ENSRNOG00000000418	Ng35	zinc finger and BTB domain containing 12 [Source:RefSeq peptide;Acc:NP_001128463]	20	4.03995	4.04133	0	0	NA	NA	0	0	0.599352	1	1.25844	-0.0729882	0.374742	0	1.30376
ENSRNOG00000000419	Cfb	complement C2 precursor [Source:RefSeq peptide;Acc:NP_757376]	20	4.05122	4.0778	0	0	NA	NA	0	0	0.261873	1	0.87034	-0.108352	0.186896	0	2.17823
ENSRNOG00000000420	Rdbp	RD RNA-binding protein [Source:RefSeq peptide;Acc:NP_997713]	20	4.07792	4.24996	0	0	0.374251	1.07678	0	0	0.448963	1	1.09443	-0.0670181	0.415157	0	3.32274
ENSRNOG00000000421	Skiv2l	superkiller viralicidic activity 2-like (S. cerevisiae ) [Source:RefSeq peptide;Acc:NP_998724]	20	4.08441	4.0935	0	0	NA	NA	0	0	0.974675	1	1.01559	0.0730984	0.374019	0	2.57213
ENSRNOG00000000422	DOM3Z_RAT	Protein Dom3Z [Source:UniProtKB/Swiss-Prot;Acc:Q6MG77]	20	4.09367	4.09582	0	0	NA	NA	0	0	0.661784	1	1.12085	-0.0160736	0.845216	0	1.76173
ENSRNOG00000000423	Stk19	serine/threonine-protein kinase 19 [Source:RefSeq peptide;Acc:NP_001013215]	20	4.09598	4.10551	0	0	NA	NA	0	0	0.450448	1	1.20422	-0.0612472	0.456546	0	2.14508
ENSRNOG00000000431	Atf6b	cAMP responsive element binding protein-like 1 [Source:RefSeq peptide;Acc:NP_001002809]	20	4.19219	4.20003	0	0	NA	NA	0	0	0.653524	1	1.07682	0.0620917	0.45035	0	4.12629
ENSRNOG00000000432	Fkbpl	FK506-binding protein-like [Source:UniProtKB/Swiss-Prot;Acc:Q6MG81]	20	4.20111	4.20258	0	0	NA	NA	0	0	0.386328	1	1.11111	-0.142502	0.0819327	0	2.591
ENSRNOG00000000433	Prrt1	Proline-rich transmembrane protein 1 [Source:UniProtKB/Swiss-Prot;Acc:Q6MG82]	20	4.21984	4.22348	0	0	NA	NA	0	0	0.425205	1	1.14393	-0.150519	0.065983	0	5.49362
ENSRNOG00000000435	Ppt2	Lysosomal thioesterase PPT2 [Source:UniProtKB/Swiss-Prot;Acc:O70489]	20	4.22567	4.23465	0	0	NA	NA	0	0	0.476775	1	1.11818	0.0531704	0.518142	0	3.30372
ENSRNOG00000000436	Egfl8	Epidermal growth factor-like protein 8 [Source:UniProtKB/Swiss-Prot;Acc:Q6MG84]	20	4.23551	4.23786	0	0	NA	NA	0	0	0.508665	1	0.916493	0.0234695	0.775586	0	1.25453
ENSRNOG00000000437	Agpat1	1-acyl-sn-glycerol-3-phosphate acyltransferase alpha [Source:RefSeq peptide;Acc:NP_997623]	20	4.2378	4.24572	0	0	NA	NA	0	0	0.881672	1	1.05213	-0.09748	0.235337	0	5.59665
ENSRNOG00000000438	Rnf5	E3 ubiquitin-protein ligase RNF5 [Source:UniProtKB/Swiss-Prot;Acc:Q5M807]	20	4.248	4.25045	0	0	0.333076	1.02643	0	0	0.779854	1	0.989336	-0.0482475	0.557669	0	5.20964
ENSRNOG00000000439	Ager	advanced glycosylation end product-specific receptor precursor [Source:RefSeq peptide;Acc:NP_445788]	20	4.25061	4.25354	0	0	NA	NA	0	0	0.0506437	1	0.679091	-0.0233433	0.776761	0	0.925833
ENSRNOG00000000440	Pbx2	pre-B-cell leukemia homeobox 2 [Source:RefSeq peptide;Acc:NP_001002828]	20	4.25401	4.25781	0	0	0.298266	1.05667	0	0	0.550729	1	1.09098	0.0899259	0.273794	0	4.22586
ENSRNOG00000000441	Gpsm3	G-protein-signaling modulator 3 [Source:UniProtKB/Swiss-Prot;Acc:Q6MG88]	20	4.25988	4.26174	0	0	NA	NA	0	0	0.412485	1	1.18323	-0.0925464	0.259998	0	1.0197
ENSRNOG00000000442	Notch4	neurogenic locus notch homolog protein 4 precursor [Source:RefSeq peptide;Acc:NP_001002827]	20	4.26321	4.28731	0	0	NA	NA	0	0	0.311116	1	1.18438	0.0291711	0.72307	0	1.33262
ENSRNOG00000000443	C4b	Uncharacterized protein [Source:UniProtKB/TrEMBL;Acc:F1LNM4]	20	4.10616	4.11804	0	0	NA	NA	0	0	0.792124	1	1.05442	-0.229363	0.00475238	0	1.90146
ENSRNOG00000000451	RT1-Ba	rano class II histocompatibility antigen, B alpha chain precursor [Source:RefSeq peptide;Acc:NP_001008831]	20	4.698	4.70256	0	0	NA	NA	0	0	0.00349007	0.726685	1.92746	-0.0891916	0.277746	0	0.612694
ENSRNOG00000000455	Tap2	antigen peptide transporter 2 precursor [Source:RefSeq peptide;Acc:NP_114445]	20	4.77046	4.78442	0	0	NA	NA	0	0	0.359751	1	1.18687	0.18022	0.0273232	0	1.45039
ENSRNOG00000000456	Psmb8	Proteasome subunit beta type-8 [Source:UniProtKB/Swiss-Prot;Acc:P28064]	20	4.78626	4.78917	0	0	NA	NA	0	0	0.142739	1	1.28583	-0.166392	0.0418475	0	1.10671
ENSRNOG00000000457	Tap1	antigen peptide transporter 1 precursor [Source:RefSeq peptide;Acc:NP_114444]	20	4.79036	4.801	0	0	NA	NA	0	0	0.775154	1	1.07678	0.00742967	0.928101	0	0.926117
ENSRNOG00000000459	Psmb9	proteasome subunit beta type-9 [Source:RefSeq peptide;Acc:NP_036840]	20	4.8012	4.80657	0	0	NA	NA	0	0	0.972672	1	1.08754	-0.0184648	0.822544	0	1.14294
ENSRNOG00000000460	RT1-DMa	NA	20	4.84346	4.84684	0	0	0.13705	1.14585	0	0	0.357104	1	1.17598	-0.249078	0.00211463	0	3.20468
ENSRNOG00000000461	Brd2	Bromodomain-containing protein 2 [Source:UniProtKB/Swiss-Prot;Acc:Q6MGA9]	20	4.86495	4.87182	0	0	NA	NA	0	0	0.799196	1	1.03532	-0.0831255	0.311868	0	4.75923
ENSRNOG00000000463	Col11a2	collagen alpha-2(XI) chain precursor [Source:RefSeq peptide;Acc:NP_997693]	20	4.92445	4.95331	0	0	0.328101	1.09827	0	0	0.865988	1	1.01142	0.0990569	0.227812	0	3.87563
ENSRNOG00000000464	Rxrb	retinoic acid receptor RXR-beta [Source:RefSeq peptide;Acc:NP_996731]	20	4.95434	4.96088	0	0	0.554961	1.03997	0	0	0.683124	1	1.0846	0.0702681	0.392849	0	3.65758
ENSRNOG00000000465	Slc39a7	solute carrier family 39 (zinc transporter), member 7 precursor [Source:RefSeq peptide;Acc:NP_001008885]	20	4.96132	4.96465	0	0	0.444144	1.04369	0	0	0.917348	1	1.05374	-0.0498583	0.544578	0	4.22157
ENSRNOG00000000466	Hsd17b8	Estradiol 17-beta-dehydrogenase 8 [Source:UniProtKB/Swiss-Prot;Acc:Q6MGB5]	20	4.96486	4.96685	0	0	0.232549	1.05026	0	0	0.456121	1	1.15839	-0.0376408	0.647449	0	2.70672
ENSRNOG00000000467	Ring1	E3 ubiquitin-protein ligase RING1 [Source:UniProtKB/Swiss-Prot;Acc:Q6MGB6]	20	4.96825	4.97215	0	0	NA	NA	0	0	0.941191	1	1.01173	-0.107847	0.18897	0	3.52285
ENSRNOG00000000470	Vps52	Vacuolar protein sorting-associated protein 52 homolog [Source:UniProtKB/Swiss-Prot;Acc:O55166]	20	5.07376	5.08334	0	0	0.541095	1.07669	0	0	0.878076	1	1.03454	0.0608401	0.45955	0	4.5551
ENSRNOG00000000471	B3galt4	beta-1,3-galactosyltransferase 4 [Source:RefSeq peptide;Acc:NP_598237]	20	5.08788	5.08943	0	0	NA	NA	0	0	0.563792	1	1.2032	-0.104065	0.205043	0	0.788589
ENSRNOG00000000473	Pfdn6	prefoldin 6 [Source:RefSeq peptide;Acc:NP_001158190]	20	5.09776	5.09919	0	0	0.0276591	0.907426	0	0	0.639336	1	1.0359	-0.0906263	0.270059	0	5.04675
ENSRNOG00000000474	Rgl2	ral guanine nucleotide dissociation stimulator-like 2 [Source:RefSeq peptide;Acc:NP_997712]	20	5.10026	5.10799	0	0	0.141583	1.13501	0	0	0.998779	1	1.03427	0.0150211	0.855236	0	2.58227
ENSRNOG00000000476	Zbtb22	zinc finger and BTB domain containing 22 [Source:RefSeq peptide;Acc:NP_001009172]	20	5.1181	5.12126	0	0	0.308601	0.94399	0	0	0.856345	1	0.990473	0.0408605	0.619571	0	3.15896
ENSRNOG00000000477	Daxx	death domain-associated protein 6 [Source:RefSeq peptide;Acc:NP_543167]	20	5.12186	5.1276	0	0	0.897413	1.00494	0	0	0.643618	1	1.08301	-0.0548825	0.50474	0	2.70838
ENSRNOG00000000480	Phf1	PHD finger protein 1 [Source:RefSeq peptide;Acc:NP_997703]	20	5.17005	5.17503	0	0	NA	NA	0	0	0.549639	1	1.10328	0.154615	0.0588684	0	3.21843
ENSRNOG00000000481	Cuta	protein CutA isoform 1 precursor [Source:RefSeq peptide;Acc:NP_997659]	20	5.17512	5.17661	0	0	0.681219	0.972292	0	0	0.878339	1	0.994965	-0.0832678	0.311038	0	5.19617
ENSRNOG00000000483	Syngap1	ras GTPase-activating protein SynGAP isoform 1 [Source:RefSeq peptide;Acc:NP_851606]	20	5.17852	5.20845	0	0	NA	NA	0	0	0.891385	1	1.01014	0.0383662	0.641123	0	5.24652
ENSRNOG00000000485	Bak1	bcl-2 homologous antagonist/killer [Source:RefSeq peptide;Acc:NP_446264]	20	5.25595	5.26459	0	0	NA	NA	0	0	0.980759	1	1.03367	0.0207298	0.801203	0	2.25757
ENSRNOG00000000487	Grm4	Metabotropic glutamate receptor 4 [Source:UniProtKB/Swiss-Prot;Acc:P31423]	20	5.62469	5.65524	0	0	0.675668	0.98234	0	0	0.706269	1	1.19235	-0.0938994	0.253066	0	3.04476
ENSRNOG00000000488	Hmga1	High mobility group protein HMG-I/HMG-Y [Source:UniProtKB/Swiss-Prot;Acc:Q8K585]	20	5.76905	5.77228	0	0	NA	NA	0	0	0.251848	1	1.23039	0.0480342	0.559414	0	4.47515
ENSRNOG00000000489	Nudt3	Diphosphoinositol polyphosphate phosphohydrolase 1 [Source:UniProtKB/Swiss-Prot;Acc:Q566C7]	20	5.78904	5.84163	0	0	0.0250242	1.07422	0	0	0.24049	1	1.14799	-0.0187937	0.819436	0	6.36254
ENSRNOG00000000490	Rps10	40S ribosomal protein S10 [Source:UniProtKB/Swiss-Prot;Acc:P63326]	20	5.84932	5.85389	0	0	NA	NA	0	0	0.949443	1	0.997204	-0.0613574	0.455735	0	4.1686
ENSRNOG00000000493	LOC685273	U1 small nuclear ribonucleoprotein C [Source:UniProtKB/Swiss-Prot;Acc:D3ZCL3]	20	6.05326	6.06384	0	0	NA	NA	0	0	0.817064	1	1.06782	-0.190938	0.0192568	0	3.64399
ENSRNOG00000000495	RGD1307264		20	6.06778	6.10847	0	0	NA	NA	0	0	0.824451	1	1.04821	0.111194	0.175526	0	1.80327
ENSRNOG00000000498	Anks1a	ankyrin repeat and SAM domain-containing protein 1A [Source:RefSeq peptide;Acc:NP_001101083]	20	6.12132	6.27482	0	0	0.809403	0.981632	0	0	0.777659	1	1.02984	0.02894	0.725176	0	2.33292
ENSRNOG00000000501	Znf76	zinc finger protein 76 [Source:RefSeq peptide;Acc:NP_001128227]	20	6.42372	6.4465	0	0	0.635114	0.981791	0	0	0.672131	1	1.10196	-0.0770719	0.348536	0	3.51275
ENSRNOG00000000503	Ppard	peroxisome proliferator-activated receptor delta [Source:RefSeq peptide;Acc:NP_037273]	20	6.47909	6.54302	0	0	NA	NA	0	0	0.99475	1	0.982812	-0.0877373	0.285688	0	2.90074
ENSRNOG00000000504	Fance	Fanconi anemia group E protein [Source:RefSeq peptide;Acc:NP_001178647]	20	6.5559	6.56691	0	0	NA	NA	0	0	0.80371	1	1.09246	-0.0489231	0.55216	0	2.1096
ENSRNOG00000000505	Rpl10a	60S ribosomal protein L10a [Source:UniProtKB/Swiss-Prot;Acc:P62907]	20	6.56908	6.57164	0	0	NA	NA	0	0	0.517451	1	0.928195	0.0330237	0.688286	0	6.06169
ENSRNOG00000000506	Tead3	TEA domain family member 3 [Source:RefSeq peptide;Acc:NP_001091686]	20	6.57234	6.59172	0	0	NA	NA	0	0	0.32826	1	0.841238	0.0473835	0.564753	0	0.811604
ENSRNOG00000000511	Srpk1	serine/threonine-protein kinase SRPK1 [Source:RefSeq peptide;Acc:NP_001020897]	20	6.82941	6.87088	0	0	NA	NA	0	0	0.474566	1	1.08425	-0.181619	0.0261288	0	4.09624
ENSRNOG00000000512	B2GUX9_RAT	Slc26a8 protein; Uncharacterized protein [Source:UniProtKB/TrEMBL;Acc:B2GUX9]	20	6.88649	6.89856	0	0	NA	NA	0	0	0.519558	1	0.903025	-0.0761812	0.354151	0	2.13251
ENSRNOG00000000513	Mapk14	mitogen-activated protein kinase 14 [Source:RefSeq peptide;Acc:NP_112282]	20	6.93925	7.00038	0	0	0.110613	1.09758	0	0	0.870497	1	1.01905	-0.113276	0.167529	0	4.00202
ENSRNOG00000000517	Kctd20	Protein Kctd20; Similar to RIKEN cDNA 2410004N11; DNA segment, Chr 17, ERATO Doi 562, expressed (Predicted), isoform CRA_a [Source:UniProtKB/TrEMBL;Acc:D3ZGN4]	20	7.23924	7.25314	0	0	NA	NA	0	0	0.939208	1	0.982129	-0.0702681	0.392849	0	2.93544
ENSRNOG00000000519	F1LUL1_RAT	serine/threonine-protein kinase 38 [Source:RefSeq peptide;Acc:NP_001015025]	20	7.25756	7.292	0	0	0.33853	1.08933	0	0	0.799346	1	1.03567	-0.0799272	0.330915	0	3.16429
ENSRNOG00000000520	Sfrs3	splicing factor, arginine/serine-rich 3 [Source:RefSeq peptide;Acc:NP_001041372]	20	7.31665	7.32658	0	0	0.295281	1.04292	0	0	0.837019	1	1.00588	-0.00332282	0.96781	0	4.77038
ENSRNOG00000000521	Cdkn1a	cyclin-dependent kinase inhibitor 1 [Source:RefSeq peptide;Acc:NP_542960]	20	7.37939	7.3856	0	0	NA	NA	0	0	0.661081	1	1.11928	0.0950674	0.247184	0	2.87171
ENSRNOG00000000522	Cpne5	copine-5 [Source:RefSeq peptide;Acc:NP_001101086]	20	7.45364	7.53537	0	0	0.433352	0.97505	0	0	0.808282	1	0.976797	0.0299978	0.715555	0	4.54759
ENSRNOG00000000523	Ppil1	peptidyl-prolyl cis-trans isomerase-like 1 [Source:RefSeq peptide;Acc:NP_001029360]	20	7.5489	7.56564	0	0	0.238886	0.924002	0	0	0.45479	1	1.10548	0.00455665	0.955867	0	3.10699
ENSRNOG00000000524	RGD735065	Bombesin receptor-activated protein C6orf89 homolog [Source:UniProtKB/Swiss-Prot;Acc:Q6P6G2]	20	7.57099	7.61018	0	0	0.235516	0.946854	0	0	0.549915	1	0.936001	0.0650198	0.429234	0	4.3483
ENSRNOG00000000525	D3ZGM7_RAT	peptidase inhibitor 16 precursor [Source:RefSeq peptide;Acc:NP_001163952]	20	7.63628	7.64448	0	0	NA	NA	0	0	0.240473	1	1.47732	-0.138757	0.0903796	0	1.3497
ENSRNOG00000000527	Mtch1	mitochondrial carrier homolog 1 [Source:RefSeq peptide;Acc:NP_001094303]	20	7.64978	7.67329	0	0	0.341225	0.982776	0	0	0.601151	1	1.11857	-0.0350789	0.669988	0	7.12995
ENSRNOG00000000528	Fgd2	FYVE, RhoGEF and PH domain-containing protein 2 [Source:RefSeq peptide;Acc:NP_001101087]	20	7.68479	7.70212	0	0	NA	NA	0	0	0.317071	1	0.842914	0.0385653	0.639392	0	0.695993
ENSRNOG00000000529	Pim1	Serine/threonine-protein kinase pim-1 [Source:UniProtKB/Swiss-Prot;Acc:P26794]	20	7.81715	7.8218	0	0	NA	NA	0	0	0.288273	1	1.36547	0.115707	0.158541	0	1.08944
ENSRNOG00000000531	LOC689755	coiled-coil domain-containing protein 167 [Source:RefSeq peptide;Acc:NP_001103018]	20	8.01495	8.02971	0	0	NA	NA	0	0	0.12886	1	0.711559	0.0782258	0.341345	0	1.83857
ENSRNOG00000000532	Ftsjd2	Cap-specific mRNA (nucleoside-2'-O-)-methyltransferase 1 [Source:UniProtKB/Swiss-Prot;Acc:Q5U2Z5]	20	7.92978	8.01439	0	0	0.465086	0.957738	0	0	0.724653	1	0.979745	0.0182088	0.824964	0	4.70024
ENSRNOG00000000534	F1LNA5_RAT	TBC1 domain family, member 22B [Source:MGI Symbol;Acc:MGI:2681867]	20	7.88019	7.9195	0	0	NA	NA	0	0	0.98643	1	0.993128	-0.053078	0.518871	0	3.31294
ENSRNOG00000000536	MDGA1_RAT	MAM domain-containing glycosylphosphatidylinositol anchor protein 1 [Source:UniProtKB/Swiss-Prot;Acc:P85171]	20	8.14969	8.20015	0	0	0.364839	0.950483	0	0	0.718232	1	1.20211	0.0830384	0.312377	0	1.61056
ENSRNOG00000000539	Zfand3	AN1-type zinc finger protein 3 [Source:UniProtKB/Swiss-Prot;Acc:Q5U2M7]	20	8.38383	8.5236	0	0	0.605083	1.02279	0	0	0.627624	1	1.07161	-0.0101036	0.902336	0	4.25038
ENSRNOG00000000540	BTBD9_RAT	BTB/POZ domain-containing protein 9 [Source:UniProtKB/Swiss-Prot;Acc:Q5PQR3]	20	8.83681	8.88131	0	0	NA	NA	0	0	0.517811	1	1.10973	-0.037079	0.652365	0	2.76322
ENSRNOG00000000541	Glo1	Lactoylglutathione lyase [Source:UniProtKB/Swiss-Prot;Acc:Q6P7Q4]	20	8.90099	8.919	0	0	0.206539	0.939179	0	0	0.997913	1	0.973814	-0.194928	0.0168312	0	5.85608
ENSRNOG00000000546	Nt5dc1	5'-nucleotidase domain-containing protein 1 [Source:RefSeq peptide;Acc:NP_001099863]	20	38.6462	38.7506	31.8136	31.9304	0.00983193	1.0863	0	0	0.0147466	1	1.48498	0.022289	0.786596	0	1.80894
ENSRNOG00000000547	Tspyl4	testis-specific Y-encoded-like protein 4 [Source:RefSeq peptide;Acc:NP_001012075]	20	38.6393	38.6413	31.8059	31.8081	0.312652	0.929115	0	0	0.53028	1	1.07295	-0.0993538	0.226414	0	6.45725
ENSRNOG00000000549	Tspyl1	testis-specific Y-encoded-like protein 1 [Source:RefSeq peptide;Acc:NP_001013051]	20	38.6223	38.6248	31.7868	31.7897	0.770116	0.990842	0	0	0.575865	1	1.02862	0.0408534	0.619632	0	5.61037
ENSRNOG00000000551	RGD1305587	uncharacterized protein LOC294499 [Source:RefSeq peptide;Acc:NP_001120924]	20	29.495	29.4977	21.573	21.576	NA	NA	0	0	0.583941	1	1.08087	-0.0197858	0.810081	0	3.88126
ENSRNOG00000000552	Col13a1	collagen alpha-1(XIII) chain [Source:RefSeq peptide;Acc:NP_001102642]	20	29.2087	29.3488	21.2525	21.4093	NA	NA	0	0	0.459285	1	1.24287	0.077504	0.345832	0	0.959427
ENSRNOG00000000555	Eif4ebp2	eukaryotic translation initiation factor 4E-binding protein 2 [Source:RefSeq peptide;Acc:NP_001028241]	20	29.5626	29.5791	21.6487	21.6671	0.333135	0.955334	0	0	0.598723	1	1.12794	-0.0528006	0.521061	0	3.73935
ENSRNOG00000000557	Sar1a	GTP-binding protein SAR1a [Source:RefSeq peptide;Acc:NP_001007740]	20	29.0482	29.0606	21.073	21.0869	0.130018	0.983179	0	0	0.744932	1	0.955824	-0.0974604	0.235432	0	5.10948
ENSRNOG00000000558	Ppa1	inorganic pyrophosphatase [Source:RefSeq peptide;Acc:NP_001094304]	20	29.0156	29.0424	21.0366	21.0665	0.149897	0.962234	0	0	0.779141	1	0.963973	-0.037495	0.648723	0	5.1021
ENSRNOG00000000560	Lrrc20	leucine-rich repeat-containing protein 20 [Source:RefSeq peptide;Acc:NP_001102641]	20	28.8899	28.9512	20.8959	20.9645	0.626168	0.966115	0	0	0.700477	1	0.992169	0.0117712	0.886317	0	1.95704
ENSRNOG00000000561	Pald	paladin [Source:RefSeq peptide;Acc:NP_001029300]	20	28.6821	28.7187	20.6633	20.7042	NA	NA	0	0	0.485779	1	0.886996	0.0294591	0.720449	0	1.59557
ENSRNOG00000000565	Sgpl1	Sphingosine-1-phosphate lyase 1 [Source:UniProtKB/Swiss-Prot;Acc:Q8CHN6]	20	28.4597	28.504	20.4145	20.464	0.71977	0.959237	0	0	0.290536	1	0.846728	-0.133674	0.102934	0	3.29753
ENSRNOG00000000566	Pcbd1	Pterin-4-alpha-carbinolamine dehydratase [Source:UniProtKB/Swiss-Prot;Acc:P61459]	20	28.3666	28.4542	20.3103	20.4082	0.190731	1.10248	0	0	0.771779	1	0.982773	0.0497818	0.545196	0	2.96828
ENSRNOG00000000567	Unc5b	netrin receptor UNC5B precursor [Source:RefSeq peptide;Acc:NP_071543]	20	28.0952	28.1622	20.0066	20.0815	NA	NA	0	0	0.523976	1	1.22003	-0.105095	0.200573	0	2.77042
ENSRNOG00000000568	Slc29a3	Equilibrative nucleoside transporter 3 [Source:UniProtKB/Swiss-Prot;Acc:Q80WK7]	20	28.0421	28.0802	19.9471	19.9898	NA	NA	0	0	0.369364	1	1.17285	0.157988	0.0534951	0	2.64565
ENSRNOG00000000569	MGC112715	platelet receptor Gi24 [Source:RefSeq peptide;Acc:NP_001037765]	20	27.6626	27.6849	19.5862	19.6069	0.319754	1.09887	0	0	0.457391	1	0.926416	-0.0610214	0.458211	0	3.03505
ENSRNOG00000000571	Psap	sulfated glycoprotein 1 isoform A preproprotein [Source:RefSeq peptide;Acc:NP_037145]	20	27.5951	27.6219	19.5234	19.5484	0.615175	0.986931	0	0	0.72256	1	0.973958	-0.0226321	0.783391	0	8.60267
ENSRNOG00000000572	Chst3	carbohydrate sulfotransferase 3 [Source:RefSeq peptide;Acc:NP_445860]	20	27.4804	27.483	19.4168	19.4192	NA	NA	0	0	0.492994	1	1.22462	0.210904	0.00957998	0	0.899208
ENSRNOG00000000573	Spock2	testican-2 precursor [Source:RefSeq peptide;Acc:NP_001102003]	20	27.3978	27.4215	19.34	19.362	NA	NA	0	0	0.700243	1	1.08636	0.123799	0.131208	0	6.76199
ENSRNOG00000000574	F1LTG5_RAT	Uncharacterized protein [Source:UniProtKB/TrEMBL;Acc:F1LTG5]	20	27.3204	27.3207	19.268	19.2683	NA	NA	0	0	0.74198	1	0.961845	-0.0276777	0.736713	0	0.784192
ENSRNOG00000000575	Ascc1	activating signal cointegrator 1 complex subunit 1 [Source:RefSeq peptide;Acc:NP_001007633]	20	27.3017	27.3915	19.2506	19.3341	0.366464	0.930767	0	0	0.804701	1	1.06587	-0.0643567	0.433966	0	2.92211
ENSRNOG00000000576	LOC100364587	RCG22080, isoform CRA_b; Uncharacterized protein [Source:UniProtKB/TrEMBL;Acc:D3ZDN9]	20	27.2881	27.3019	19.238	19.2508	NA	NA	0	0	0.942534	1	0.968845	0.0288226	0.726246	0	2.0183
ENSRNOG00000000577	Ddit4	DNA damage-inducible transcript 4 protein [Source:RefSeq peptide;Acc:NP_543182]	20	27.2526	27.2544	19.2049	19.2066	0.977669	1.01202	0	0	0.0889615	1	1.29675	0.0378933	0.645244	0	4.95128
ENSRNOG00000000579	Marcks	myristoylated alanine-rich C-kinase substrate [Source:RefSeq peptide;Acc:NP_001258019]	20	41.3064	41.3097	34.7905	34.7942	0.165738	0.834811	0	0	0.246683	1	1.13696	0.022817	0.781666	0	4.96431
ENSRNOG00000000580	Fam26d	Protein Fam26d [Source:UniProtKB/TrEMBL;Acc:D3ZDN4]	20	37.7809	37.7836	30.8453	30.8483	NA	NA	0	0	0.63174	1	1.37696	0.126272	0.123622	0	0.759236
ENSRNOG00000000581	Cdc40	pre-mRNA-processing factor 17 [Source:RefSeq peptide;Acc:NP_001102008]	20	44.9525	44.9746	38.8706	38.8954	0.824274	0.985378	0	0	0.585296	1	0.907662	-0.0419663	0.610118	0	3.29044
ENSRNOG00000000582	Ddo	D-aspartate oxidase [Source:RefSeq peptide;Acc:NP_001102935]	20	44.7669	44.7868	38.663	38.6853	NA	NA	0	0	0.538712	1	1.10448	-0.0916735	0.26454	0	1.86996
ENSRNOG00000000583	Cdc2l6	cyclin-dependent kinase 19 [Source:RefSeq peptide;Acc:NP_001101104]	20	44.5275	44.67	38.395	38.5546	0.516978	1.06881	0	0	0.684285	1	0.932239	0.0305863	0.710223	0	3.83821
ENSRNOG00000000585	Amd1	S-adenosylmethionine decarboxylase proenzyme S-adenosylmethionine decarboxylase alpha chain S-adenosylmethionine decarboxylase beta chain [Source:UniProtKB/Swiss-Prot;Acc:P17708]	20	44.4525	44.4682	38.3111	38.3287	0.161168	0.909044	0	0	0.929307	1	0.973413	-0.201894	0.0132282	0	5.44652
ENSRNOG00000000586	Gtf3c6	general transcription factor 3C polypeptide 6 [Source:RefSeq peptide;Acc:NP_001102007]	20	44.415	44.4247	38.2692	38.28	NA	NA	0	0	0.352819	1	0.853257	-0.00569448	0.944862	0	2.725
ENSRNOG00000000587	Bxdc1	ribosome production factor 2 homolog [Source:RefSeq peptide;Acc:NP_001099861]	20	44.3886	44.4101	38.2397	38.2637	0.153283	1.19495	0	0	0.924799	1	0.954647	0.0532966	0.517148	0	3.62502
ENSRNOG00000000589	RGD1310495		20	44.1896	44.2015	38.0169	38.0302	NA	NA	0	0	0.83492	1	1.11626	0.0138015	0.866877	0	0.656508
ENSRNOG00000000593	Rev3l	DNA polymerase zeta catalytic subunit [Source:RefSeq peptide;Acc:NP_001077435]	20	43.8705	44.0424	37.6599	37.8522	0.751815	1.01578	0	0	1	1	0.946254	0.02854	0.728826	0	2.77535
ENSRNOG00000000595	Traf3ip2	adapter protein CIKS [Source:RefSeq peptide;Acc:NP_001037713]	20	43.7476	43.7923	37.5223	37.5723	NA	NA	0	0	0.314877	1	0.818077	0.0626482	0.446293	0	0.683698
ENSRNOG00000000596	Fyn	Tyrosine-protein kinase Fyn [Source:UniProtKB/Swiss-Prot;Acc:Q62844]	20	43.5019	43.6956	37.2473	37.4641	0.58678	1.01551	0	0	0.548472	1	0.933734	-0.0850492	0.300763	0	4.90357
ENSRNOG00000000598	Tube1	tubulin epsilon chain [Source:RefSeq peptide;Acc:NP_001102006]	20	43.2801	43.2984	36.9992	37.0197	0.894381	1.00369	0	0	0.537255	1	0.889746	0.000871151	0.991558	0	1.33065
ENSRNOG00000000599	F1LTF8_RAT		20	43.1808	43.2607	36.8881	36.9775	0.198659	1.05619	0	0	0.554613	1	0.920784	-0.0420268	0.609603	0	1.4977
ENSRNOG00000000604	Hdac2	histone deacetylase 2 [Source:RefSeq peptide;Acc:NP_445899]	20	41.1621	41.1865	34.629	34.6563	0.0172195	1.16968	0	0	0.481267	1	1.08967	-0.026691	0.745772	0	4.43113
ENSRNOG00000000605	Hs3st5	heparan sulfate glucosamine 3-O-sulfotransferase 5 [Source:RefSeq peptide;Acc:NP_001099862]	20	40.7118	41.0228	34.1251	34.4731	0.867503	0.979718	0	0	0.335019	1	1.21077	-0.0894032	0.276603	0	1.15061
ENSRNOG00000000606	Pcdh15	protocadherin-15 precursor [Source:RefSeq peptide;Acc:NP_001258306]	20	14.5059	14.9901	5.30892	6.04219	NA	NA	0	0	0.956862	1	0.980238	0.154	0.0598947	0	1.4101
ENSRNOG00000000609	Ipmk	Inositol polyphosphate multikinase [Source:UniProtKB/Swiss-Prot;Acc:Q99NI4]	20	17.9471	17.9823	10.5199	10.5732	0.00976751	1.16816	0	0	0.80488	1	1.01792	-0.135638	0.0979282	0	2.8541
ENSRNOG00000000610	Cisd1	CDGSH iron-sulfur domain-containing protein 1 [Source:UniProtKB/Swiss-Prot;Acc:B0K020]	20	17.986	17.9994	10.5788	10.599	0.703466	1.01164	0	0	0.917709	1	0.97869	0.0662323	0.42066	0	4.79256
ENSRNOG00000000611	Ube2d1	Ubiquitin-conjugating enzyme E2 D1 [Source:UniProtKB/Swiss-Prot;Acc:D3ZDK2]	20	18.0407	18.0862	10.6378	10.6801	0.00181567	1.29967	1	0	0.562079	1	1.12434	-0.074222	0.3667	0	3.86209
ENSRNOG00000000613	Tfam	Transcription factor A, mitochondrial [Source:UniProtKB/Swiss-Prot;Acc:Q91ZW1]	20	18.1006	18.1127	10.6936	10.7048	0.107071	1.10244	0	0	0.617245	1	1.06972	0.0929731	0.257798	0	3.42346
ENSRNOG00000000614	Bicc1	protein bicaudal C homolog 1 [Source:RefSeq peptide;Acc:NP_001102001]	20	18.2881	18.477	10.8679	11.0436	NA	NA	0	0	0.963763	1	1.01909	0.0388249	0.637137	0	1.21634
ENSRNOG00000000618	Mdga2	MAM domain-containing glycosylphosphatidylinositol anchor protein 2 [Source:UniProtKB/Swiss-Prot;Acc:P60756]	6	88.1554	89.0205	55.7596	56.0912	0.155102	1.10029	0	0	0.473164	1	1.10405	-0.0243513	0.76739	0	2.39554
ENSRNOG00000000622	Hint1	Histidine triad nucleotide-binding protein 1 [Source:UniProtKB/Swiss-Prot;Acc:P62959]	10	40.2719	40.2763	38.2259	38.2287	NA	NA	0	0	0.840948	1	1.02409	0.195868	0.0162996	0	6.45353
ENSRNOG00000000633	Rhobtb1	rho-related BTB domain-containing protein 1 [Source:RefSeq peptide;Acc:NP_001101092]	20	20.0898	20.1661	12.5435	12.6144	NA	NA	0	0	0.912627	1	0.994031	0.0910672	0.267725	0	1.04685
ENSRNOG00000000634	RGD1306739	uncharacterized protein LOC361834 [Source:RefSeq peptide;Acc:NP_001128048]	20	20.872	20.9819	13.2709	13.3731	0.307443	1.10003	0	0	0.0777957	1	1.3179	0.0264012	0.748439	0	2.41287
ENSRNOG00000000635	Arid5b	AT-rich interactive domain-containing protein 5B [Source:RefSeq peptide;Acc:NP_001101094]	20	21.1227	21.307	13.5041	13.6755	NA	NA	0	0	0.781701	1	0.9995	-0.0640367	0.43626	0	2.80176
ENSRNOG00000000636	Rtkn2	rhotekin-2 [Source:RefSeq peptide;Acc:NP_001101095]	20	21.3625	21.4342	13.7271	13.7938	NA	NA	0	0	0.170457	1	0.717612	0.0753012	0.359754	0	1.03143
ENSRNOG00000000638	ZN365_RAT	Protein ZNF365 [Source:UniProtKB/Swiss-Prot;Acc:Q5PQS2]	20	21.4931	21.5148	13.8486	13.8688	0.227088	0.592963	0	0	0.546637	1	1.04804	-0.0903632	0.271458	0	5.46482
ENSRNOG00000000639	Ado	2-aminoethanethiol dioxygenase [Source:RefSeq peptide;Acc:NP_001101096]	20	21.8774	21.8786	14.206	14.2071	NA	NA	0	0	0.354079	1	1.30758	0.00826349	0.920057	0	2.70631
ENSRNOG00000000640	Egr2	E3 SUMO-protein ligase EGR2 [Source:UniProtKB/Swiss-Prot;Acc:P51774]	20	21.8839	21.8882	14.212	14.216	0.288595	1.26543	0	0	0.0824928	1	2.42515	-0.0357243	0.664281	0	2.60436
ENSRNOG00000000641	Nrbf2	nuclear receptor-binding factor 2 [Source:RefSeq peptide;Acc:NP_071522]	20	22.1282	22.1465	14.4393	14.4562	NA	NA	0	0	0.241619	1	1.21675	-0.0645718	0.432428	0	2.36114
ENSRNOG00000000645	Reep3	receptor expression-enhancing protein 3 [Source:RefSeq peptide;Acc:NP_001099856]	20	22.3141	22.3971	14.6121	14.6893	NA	NA	0	0	0.922681	1	0.976021	0.0865479	0.292295	0	3.68403
ENSRNOG00000000648	Jmjd1c	jumonji domain containing 1C [Source:RefSeq peptide;Acc:NP_001178648]	20	22.1525	22.1952	14.4618	14.5016	NA	NA	0	0	0.69517	1	0.920767	0.0202516	0.805697	0	3.35891
ENSRNOG00000000655	Ptprc	Receptor-type tyrosine-protein phosphatase C [Source:UniProtKB/Swiss-Prot;Acc:P04157]	13	51.2462	51.358	17.3712	17.4815	NA	NA	0	0	0.162946	1	0.729927	0.159746	0.0508585	0	0.762714
ENSRNOG00000000657	Nek7	Serine/threonine-protein kinase Nek7 [Source:UniProtKB/Swiss-Prot;Acc:D3ZBE5]	13	51.6793	51.9426	17.7981	18.0577	0.00180149	0.792365	1	0	0.336073	1	0.838927	-0.0108769	0.894902	0	4.58132
ENSRNOG00000000658	Acacb	acetyl-CoA carboxylase 2 [Source:RefSeq peptide;Acc:NP_446374]	12	43.3886	43.493	45.3	45.3	NA	NA	0	0	0.887007	1	1.06025	-0.0219512	0.789754	0	0.973861
ENSRNOG00000000660	Asphd2	Aspartate beta-hydroxylase domain-containing protein 2 [Source:UniProtKB/Swiss-Prot;Acc:Q5HZW3]	19	14.3621	14.3733	11.1517	11.1605	0.124831	0.916176	0	0	0.640235	1	1.0933	0.0235602	0.774742	0	3.76378
ENSRNOG00000000661	Hps4	Hermansky-Pudlak syndrome 4 homolog [Source:RefSeq peptide;Acc:NP_001100618]	19	14.3266	14.3558	11.1242	11.1468	0.698804	0.981553	0	0	0.788418	1	0.96128	-0.0649221	0.42993	0	2.99308
ENSRNOG00000000662	F1LTK4_RAT	SRR1 domain containing [Source:MGI Symbol;Acc:MGI:1917368]	19	14.3191	14.3247	11.1184	11.1227	0.729454	0.972433	0	0	0.726284	1	0.931737	0.0536967	0.514003	0	2.29799
ENSRNOG00000000663	Tfip11	Tuftelin-interacting protein 11 [Source:UniProtKB/Swiss-Prot;Acc:Q5U2Y6]	19	14.3076	14.3198	11.1094	11.1189	0.189375	0.934111	0	0	0.81045	1	1.04957	0.0448127	0.586081	0	2.8669
ENSRNOG00000000664	Tpst2	Protein-tyrosine sulfotransferase 2 [Source:UniProtKB/Swiss-Prot;Acc:Q5RJS8]	19	14.2586	14.2975	11.0714	11.1016	0.501846	0.96542	0	0	0.728512	1	1.11402	-0.0954585	0.245236	0	2.73984
ENSRNOG00000000665	Pitpnb	Phosphatidylinositol transfer protein beta isoform [Source:UniProtKB/Swiss-Prot;Acc:P53812]	12	45.386	45.4348	45.3	45.3	0.151024	1.03901	0	0	0.9999	1	0.990006	0.157488	0.0542644	0	4.58542
ENSRNOG00000000687		NA	4	27.8935	27.8967	18.8303	18.8329	NA	NA	0	0	0.838828	1	0.968027	0.0270554	0.742421	0	1.76515
ENSRNOG00000000692	Ung	uracil-DNA glycosylase [Source:RefSeq peptide;Acc:NP_001013142]	12	43.5206	43.5295	45.3	45.3	0.521468	1.02891	0	0	0.381151	1	1.22977	-0.106682	0.193818	0	1.00796
ENSRNOG00000000693	Svop	SV2 related protein [Source:MGI Symbol;Acc:MGI:1915916]	12	43.5668	43.625	45.3	45.3	0.858674	1.00807	0	0	0.999393	1	1.02623	0.0627655	0.44544	0	4.86012
ENSRNOG00000000695	F1LWM1_RAT	Uncharacterized protein [Source:UniProtKB/TrEMBL;Acc:F1LW48]	12	43.6604	43.7147	45.3	45.3	0.0727518	1.14196	0	0	0.717526	1	1.04948	0.215341	0.00813435	0	2.06452
ENSRNOG00000000697	Coro1c	coronin-1C [Source:RefSeq peptide;Acc:NP_001102797]	12	43.7472	43.8194	45.3	45.3	0.237563	0.959602	0	0	0.700923	1	1.07646	0.0461532	0.574914	0	4.45438
ENSRNOG00000000699	Selplg	P-selectin glycoprotein ligand 1 precursor [Source:RefSeq peptide;Acc:NP_001013248]	12	43.8423	43.8436	45.3	45.3	NA	NA	0	0	0.403964	1	1.17287	-0.191934	0.0186248	0	3.4223
ENSRNOG00000000700	Tmem119	transmembrane protein 119 precursor [Source:RefSeq peptide;Acc:NP_001100625]	12	43.863	43.8701	45.3	45.3	0.626797	0.950854	0	0	0.281314	1	0.898471	-0.10814	0.187763	0	2.50755
ENSRNOG00000000701	Iscu	iron-sulfur cluster assembly enzyme ISCU, mitochondrial [Source:RefSeq peptide;Acc:NP_001099406]	12	43.8864	43.8923	45.3	45.3	0.32747	1.05391	0	0	0.880531	1	0.992369	0.161742	0.0479964	0	4.94454
ENSRNOG00000000702	Sart3	squamous cell carcinoma antigen recognized by T-cells 3 [Source:RefSeq peptide;Acc:NP_001100626]	12	43.8935	43.9211	45.3	45.3	0.121299	0.933553	0	0	0.636229	1	1.06635	-0.159492	0.051233	0	3.17263
ENSRNOG00000000703	Ficd	Adenosine monophosphate-protein transferase FICD [Source:UniProtKB/Swiss-Prot;Acc:Q6AY47]	12	43.9247	43.9275	45.3	45.3	NA	NA	0	0	0.416574	1	1.16464	0.207099	0.0109953	0	2.24381
ENSRNOG00000000704	Cmklr1	chemokine-like receptor 1 [Source:RefSeq peptide;Acc:NP_071554]	12	44.0565	44.061	45.3	45.3	NA	NA	0	0	0.891252	1	1.00228	-0.110124	0.179745	0	0.981724
ENSRNOG00000000705	D3ZAS6_RAT	uncharacterized protein LOC360824 [Source:RefSeq peptide;Acc:NP_001258107]	12	44.0925	44.1071	45.3	45.3	NA	NA	0	0	0.820014	1	0.998413	0.0234571	0.775702	0	2.63322
ENSRNOG00000000708	F1LYU5_RAT	small G protein signaling modulator 1 [Source:RefSeq peptide;Acc:NP_001099407]	12	44.3298	44.3952	45.3	45.3	0.276776	1.05121	0	0	0.46018	1	1.09871	-0.0389831	0.635764	0	4.27495
ENSRNOG00000000711	RGD1306556	Protein RGD1306556 [Source:UniProtKB/TrEMBL;Acc:F1M8B8]	12	44.5483	44.5596	45.3	45.3	NA	NA	0	0	0.763485	1	0.92903	-0.0745865	0.364345	0	3.32605
ENSRNOG00000000713			11	3.1156	3.11689	0	0	NA	NA	0	0	0.644051	1	1.02943	-0.0394276	0.631915	0	3.62972
ENSRNOG00000000716	Htr1f	5-hydroxytryptamine receptor 1F [Source:RefSeq peptide;Acc:NP_068629]	11	2.26059	2.26169	0	0	NA	NA	0	0	0.740338	1	1.009	-0.122902	0.134049	0	1.10541
ENSRNOG00000000718	Cggbp1	CGG triplet repeat-binding protein 1 [Source:RefSeq peptide;Acc:NP_001099370]	11	2.18286	2.19045	0	0	0.386783	1.03878	0	0	0.559008	1	1.06684	0.0556007	0.499172	0	3.405
ENSRNOG00000000720	MGC95208	Uncharacterized protein C3orf38 homolog [Source:UniProtKB/Swiss-Prot;Acc:Q66H33]	11	2.10019	2.10484	0	0	NA	NA	0	0	1	1	0.965634	0.0121872	0.882328	0	2.41827
ENSRNOG00000000723	RT1-CE5	RT1 class I, locus CE5 isoform 1 precursor [Source:RefSeq peptide;Acc:NP_001008843]	20	3.5096	3.51373	0	0	NA	NA	0	0	0.278091	1	0.849797	-0.0628686	0.444691	0	1.44465
ENSRNOG00000000728	Clic2	Chloride intracellular channel protein 2 [Source:UniProtKB/Swiss-Prot;Acc:Q5M883]	20	0.066518	0.081536	0	0	0.0975866	1.09475	0	0	0.674137	1	0.885098	0.102817	0.210557	0	0.931043
ENSRNOG00000000729	Tmlhe	Trimethyllysine dioxygenase, mitochondrial [Source:UniProtKB/Swiss-Prot;Acc:Q91ZW6]	20	0.019528	0.056124	0	0	0.174557	0.943833	0	0	0.8119	1	0.947107	-0.0715072	0.384536	0	1.73952
ENSRNOG00000000748	Dstnl1		20	0.661424	0.661921	0	0	NA	NA	0	0	0.641254	1	1.04044	-0.130724	0.110825	0	4.3286
ENSRNOG00000000763	RT1-M3-1	RT1 class Ib, locus M3-1 precursor [Source:RefSeq peptide;Acc:NP_075210]	20	1.41255	1.41669	0	0	0.191556	0.920276	0	0	0.293862	1	0.858386	0.0277488	0.736061	0	2.01675
ENSRNOG00000000774	Gabbr1	Gamma-aminobutyric acid type B receptor subunit 1 [Source:UniProtKB/Swiss-Prot;Acc:Q9Z0U4]	20	1.55331	1.5824	0	0	0.604714	1.02406	0	0	0.846383	1	0.997667	0.0205929	0.802489	0	7.13399
ENSRNOG00000000775	Mog	myelin-oligodendrocyte glycoprotein precursor [Source:RefSeq peptide;Acc:NP_073159]	20	1.60173	1.61196	0	0	0.0651038	1.03866	0	0	0.433117	1	1.2711	-0.0340087	0.679493	0	5.55949
ENSRNOG00000000777	RT1-S3	RT1 class Ib, locus S3 precursor [Source:RefSeq peptide;Acc:NP_001008886]	20	2.81599	2.81848	0	0	0.690317	1.05439	0	0	0.918327	1	1.00426	-0.138741	0.0904171	0	1.8415
ENSRNOG00000000778	F1LQH1_RAT	ZNRD1 antisense RNA [Source:RefSeq peptide;Acc:NP_001159775]	20	1.68087	1.68276	0	0	NA	NA	0	0	0.97174	1	0.859942	0.128264	0.117764	0	1.21333
ENSRNOG00000000779	Znrd1	DNA-directed RNA polymerase I subunit RPA12 [Source:UniProtKB/Swiss-Prot;Acc:Q6MFY5]	20	1.68785	1.69147	0	0	0.317977	1.0628	0	0	0.997802	1	1.05008	-0.0536504	0.514366	0	2.05996
ENSRNOG00000000780	Ppp1r11	Protein phosphatase 1 regulatory subunit 11 [Source:UniProtKB/Swiss-Prot;Acc:Q6MFY6]	20	1.69412	1.69758	0	0	0.250393	0.968601	0	0	0.829626	1	1.04357	-0.052998	0.519502	0	4.94225
ENSRNOG00000000781	Rnf39	RING finger protein 39 [Source:UniProtKB/Swiss-Prot;Acc:Q920M2]	20	1.69753	1.70302	0	0	0.181269	1.1173	0	0	0.0405715	1	1.28154	-0.0567759	0.490131	0	2.59626
ENSRNOG00000000785	Trim39	E3 ubiquitin-protein ligase TRIM39 [Source:UniProtKB/Swiss-Prot;Acc:Q6MFZ5]	20	2.09197	2.10582	0	0	0.253462	0.962392	0	0	0.80343	1	1.07131	0.0478297	0.561089	0	2.46068
ENSRNOG00000000786	Rpp21	ribonuclease P protein subunit p21 [Source:RefSeq peptide;Acc:NP_001002831]	20	2.10682	2.10875	0	0	0.376638	0.967116	0	0	0.705669	1	1.0817	-0.0557608	0.497936	0	2.90432
ENSRNOG00000000787	F1LXB3_RAT		20	2.88435	2.88785	0	0	NA	NA	0	0	0.976625	1	1.02235	-0.0752105	0.360335	0	1.1084
ENSRNOG00000000790	F1LZ27_RAT		20	2.6435	2.64603	0	0	NA	NA	0	0	0.730293	1	0.940792	0.0152594	0.852966	0	1.14377
ENSRNOG00000000795	RT1-N3	RT1 class Ib, locus N3 [Source:RefSeq peptide;Acc:NP_001008855]	20	2.80661	2.81044	0	0	NA	NA	0	0	0.680901	1	0.898993	-0.1802	0.0273402	0	1.29922
ENSRNOG00000000796	D4A054_RAT	E3 SUMO-protein ligase RanBP2 [Source:RefSeq peptide;Acc:NP_001178533]	20	37.2721	37.3227	30.2759	30.3325	0.599831	0.978455	0	0	0.691508	1	0.992129	0.00731944	0.929165	0	4.08462
ENSRNOG00000000798	Gnl1	Guanine nucleotide-binding protein-like 1 [Source:UniProtKB/Swiss-Prot;Acc:Q6MG06]	20	2.93179	2.94068	0	0	0.607983	0.987354	0	0	0.839378	1	1.03307	0.162425	0.0470489	0	5.07892
ENSRNOG00000000799	Abcf1	ATP-binding cassette sub-family F member 1 [Source:UniProtKB/Swiss-Prot;Acc:Q6MG08]	20	2.9536	2.96214	0	0	0.971478	0.999606	0	0	1	1	1.00118	0.088052	0.283957	0	4.07083
ENSRNOG00000000800	Man1a1	mannosyl-oligosaccharide 1,2-alpha-mannosidase IA [Source:RefSeq peptide;Acc:NP_001028828]	20	32.5825	32.7668	25.028	25.2342	0.444751	0.923858	0	0	1	1	0.956299	0.100737	0.219983	0	2.68923
ENSRNOG00000000801	Msl3l2	male-specific lethal 3-like 2 [Source:RefSeq peptide;Acc:NP_001014054]	20	34.9058	34.9072	27.6279	27.6295	NA	NA	0	0	0.682501	1	1.11264	0.0753119	0.359686	0	1.79274
ENSRNOG00000000802	D4A050_RAT	RIKEN cDNA D630037F22 gene [Source:MGI Symbol;Acc:MGI:2442827]	20	34.7876	35.022	27.4956	27.7579	NA	NA	0	0	0.0718549	1	1.36996	0.0246073	0.765015	0	1.36603
ENSRNOG00000000803	PP1RA_RAT	protein phosphatase 1, regulatory subunit 10 [Source:MGI Symbol;Acc:MGI:1289273]	20	2.9715	2.98441	0	0	NA	NA	0	0	0.910824	1	0.980175	-0.00978889	0.905363	0	3.12371
ENSRNOG00000000804	Mrps18b	mitochondrial ribosomal protein S18B [Source:RefSeq peptide;Acc:NP_997699]	20	2.98599	2.99203	0	0	0.415935	0.963869	0	0	0.671809	1	0.95415	-0.108487	0.186343	0	3.97199
ENSRNOG00000000805	Gja1	Gap junction alpha-1 protein [Source:UniProtKB/Swiss-Prot;Acc:P08050]	20	35.4098	35.4223	28.1919	28.2059	0.538362	1.04011	0	0	0.681166	1	0.9068	0.114843	0.161694	0	6.55677
ENSRNOG00000000808	Hsf2	heat shock factor protein 2 [Source:RefSeq peptide;Acc:NP_113882]	20	36.5207	36.5385	29.4351	29.455	0.156465	1.04565	0	0	0.736532	1	0.991799	-0.0201645	0.806517	0	3.60708
ENSRNOG00000000809	RGD1303066	Alpha-tubulin N-acetyltransferase [Source:UniProtKB/Swiss-Prot;Acc:Q6MG11]	20	2.99241	3.00536	0	0	0.576306	0.981971	0	0	0.646321	1	1.11325	-0.173307	0.0339308	0	4.2424
ENSRNOG00000000811	Pkib	cAMP-dependent protein kinase inhibitor beta [Source:UniProtKB/Swiss-Prot;Acc:P27775]	20	36.6555	36.7507	29.5859	29.6924	0.390157	1.06117	0	0	0.757986	1	1.13927	-0.148721	0.069319	0	1.68426
ENSRNOG00000000812	RGD1302996	Uncharacterized protein C6orf136 homolog [Source:UniProtKB/Swiss-Prot;Acc:Q6MG12]	20	3.00561	3.00972	0	0	0.47801	0.95825	0	0	0.801352	1	0.981503	-0.151214	0.0647285	0	4.49464
ENSRNOG00000000814	Fabp7	Fatty acid-binding protein, brain [Source:UniProtKB/Swiss-Prot;Acc:P55051]	20	36.8125	36.816	29.7616	29.7656	0.263054	0.898984	0	0	0.669282	1	0.96777	-0.0294129	0.72087	0	4.13099
ENSRNOG00000000815	Smpdl3a	Acid sphingomyelinase-like phosphodiesterase 3a [Source:UniProtKB/Swiss-Prot;Acc:Q641Z7]	20	36.8219	36.8449	29.7721	29.7979	0.0136913	1.20874	0	0	0.751727	1	1.08656	-0.0685044	0.404864	0	2.71612
ENSRNOG00000000816	RGD1309543	rno-mir-6328 [Source:miRBase;Acc:MI0021852]	20	3.02551	3.03483	0	0	NA	NA	0	0	0.787158	1	1.01842	0.177496	0.0297824	0	1.46739
ENSRNOG00000000818	Nrm	Nurim [Source:UniProtKB/Swiss-Prot;Acc:Q6MG14]	20	3.03577	3.03925	0	0	NA	NA	0	0	0.849325	1	0.90018	0.0608934	0.459156	0	1.12486
ENSRNOG00000000821	Tubb5	Tubulin beta-5 chain [Source:UniProtKB/Swiss-Prot;Acc:P69897]	20	3.06024	3.06473	0	0	0.810372	0.990836	0	0	0.81481	1	1.05589	-0.126082	0.124193	0	7.61657
ENSRNOG00000000823	Gcc2	GRIP and coiled-coil domain-containing protein 2 [Source:UniProtKB/Swiss-Prot;Acc:D3ZZL9]	20	37.4722	37.5183	30.4998	30.5515	0.0160387	1.08662	0	0	0.688329	1	1.00667	0.0677951	0.409758	0	3.66036
ENSRNOG00000000824	Dse	dermatan-sulfate epimerase precursor [Source:RefSeq peptide;Acc:NP_001102403]	20	37.5688	37.6476	30.6079	30.6961	NA	NA	0	0	0.23816	1	0.783869	0.0960772	0.242176	0	1.22736
ENSRNOG00000000826	Flot1	Flotillin-1 [Source:UniProtKB/Swiss-Prot;Acc:Q9Z1E1]	20	3.06578	3.07616	0	0	0.643853	0.973	0	0	0.579908	1	1.07559	0.0341633	0.678117	0	5.04981
ENSRNOG00000000827	Ier3	immediate early response 3 [Source:RefSeq peptide;Acc:NP_997670]	20	3.07657	3.07775	0	0	0.90491	1.00209	0	0	0.603139	1	1.11616	0.0316921	0.70024	0	2.04616
ENSRNOG00000000830	Ddr1	epithelial discoidin domain-containing receptor 1 precursor [Source:RefSeq peptide;Acc:NP_001159494]	20	3.19666	3.21489	0	0	0.22846	1.12842	0	0	0.777288	1	1.12373	0.0116343	0.88763	0	4.19524
ENSRNOG00000000831	Gtf2h4	general transcription factor II H, polypeptide 4 [Source:RefSeq peptide;Acc:NP_997666]	20	3.22229	3.22791	0	0	0.679526	0.979998	0	0	0.829291	1	1.03738	0.100326	0.221879	0	2.37346
ENSRNOG00000000833	Vars2	Valine--tRNA ligase, mitochondrial [Source:UniProtKB/Swiss-Prot;Acc:Q6MG21]	20	3.22806	3.23891	0	0	0.287933	0.936153	0	0	0.958676	1	1.01004	0.110526	0.178152	0	2.30471
ENSRNOG00000000839	Nfkbil1	NF-kappa-B inhibitor-like protein 1 [Source:UniProtKB/Swiss-Prot;Acc:Q8R2H1]	20	3.62924	3.64422	0	0	NA	NA	0	0	0.499749	1	1.20168	0.0589289	0.473798	0	2.29012
ENSRNOG00000000840	Atp6v1g2	V-type proton ATPase subunit G 2 [Source:RefSeq peptide;Acc:NP_997655]	20	3.62632	3.62857	0	0	NA	NA	0	0	0.937147	1	0.99915	-0.10087	0.21937	0	7.60088
ENSRNOG00000000841	Bat1	Spliceosome RNA helicase Ddx39b [Source:UniProtKB/Swiss-Prot;Acc:Q63413]	20	3.61113	3.62353	0	0	NA	NA	0	0	0.692941	1	1.06765	-0.179498	0.0279574	0	6.24233
ENSRNOG00000000842	Ddah2	N(G),N(G)-dimethylarginine dimethylaminohydrolase 2 [Source:UniProtKB/Swiss-Prot;Acc:Q6MG60]	20	3.82977	3.83177	0	0	NA	NA	0	0	0.614895	1	1.10368	0.00860839	0.916732	0	3.6103
ENSRNOG00000000845	Bat5	Abhydrolase domain-containing protein 16A [Source:UniProtKB/Swiss-Prot;Acc:Q6MG55]	20	3.78276	3.79759	0	0	NA	NA	0	0	0.564634	1	1.13174	0.105391	0.199297	0	3.97883
ENSRNOG00000000847	Csnk2b	Casein kinase II subunit beta [Source:UniProtKB/Swiss-Prot;Acc:P67874]	20	3.76457	3.76898	0	0	0.224004	1.07024	0	0	0.456697	1	1.09865	-0.00256012	0.975196	0	5.4884
ENSRNOG00000000848	Bat4	HLA-B associated transcript 4 [Source:RefSeq peptide;Acc:NP_001029329]	20	3.7613	3.76434	0	0	NA	NA	0	0	0.50442	1	1.10967	-0.0670768	0.414748	0	2.61152
ENSRNOG00000000851	Bat3	Large proline-rich protein BAG6 [Source:UniProtKB/Swiss-Prot;Acc:Q6MG49]	20	3.73959	3.752	0	0	NA	NA	0	0	0.965045	1	1.00249	0.0890849	0.278324	0	4.86974
ENSRNOG00000000852	Bat2	Protein PRRC2A [Source:UniProtKB/Swiss-Prot;Acc:Q6MG48]	20	3.72428	3.73762	0	0	0.229953	1.14156	0	0	0.487245	1	1.10633	0.0608881	0.459195	0	5.41868
ENSRNOG00000000853	Aif1	Allograft inflammatory factor 1 [Source:UniProtKB/Swiss-Prot;Acc:P55009]	20	3.71443	3.71632	0	0	0.969195	0.999732	0	0	1	1	0.959041	0.0205965	0.802455	0	2.94824
ENSRNOG00000000858	Ng23	Ng23 protein [Source:RefSeq peptide;Acc:NP_001004069]	20	3.86265	3.8644	0	0	NA	NA	0	0	1	1	0.761319	-0.0435006	0.597107	0	0.809952
ENSRNOG00000000861	Zic3	zinc finger protein ZIC 3 [Source:RefSeq peptide;Acc:NP_001102489]	X	143.128	143.139	NA	NA	NA	NA	0	0	0.595405	1	0.897054	-0.01892	0.818244	0	1.00374
ENSRNOG00000000866	Rbmx	RNA-binding motif protein, X chromosome RNA-binding motif protein, X chromosome, N-terminally processed [Source:UniProtKB/Swiss-Prot;Acc:Q4V898]	X	142.113	142.119	NA	NA	NA	NA	0	0	0.938169	1	0.993287	-0.0333846	0.685059	0	3.88822
ENSRNOG00000000867	Vars	Valine--tRNA ligase [Source:UniProtKB/Swiss-Prot;Acc:Q04462]	20	3.87445	3.88897	0	0	NA	NA	0	0	0.713894	1	1.07852	-0.133339	0.103805	0	3.08491
ENSRNOG00000000869	Arhgef6	rho guanine nucleotide exchange factor 6 [Source:RefSeq peptide;Acc:NP_001005565]	X	141.946	142.069	NA	NA	NA	NA	0	0	0.788933	1	1.11677	-0.0159438	0.84645	0	1.71651
ENSRNOG00000000875	Fhl1	Four and a half LIM domains protein 1 [Source:UniProtKB/Swiss-Prot;Acc:Q9WUH4]	X	141.316	141.329	NA	NA	0.51295	1.01595	0	0	0.237119	1	0.876306	-0.103384	0.208038	0	4.83032
ENSRNOG00000000879	Slc9a6	Sodium/hydrogen exchanger [Source:UniProtKB/TrEMBL;Acc:D3ZJ86]	X	141.146	141.199	NA	NA	0.83109	1.01013	0	0	0.991826	1	1.00506	0.00942443	0.908871	0	4.44347
ENSRNOG00000000881	Mmgt1	Membrane magnesium transporter 1 [Source:UniProtKB/Swiss-Prot;Acc:B5DF51]	X	141.127	141.136	NA	NA	NA	NA	0	0	0.39146	1	1.07393	0.158786	0.0522844	0	2.92188
ENSRNOG00000000885	LOC100362819	autism susceptibility candidate 2 [Source:MGI Symbol;Acc:MGI:1919847]	12	26.1273	26.1666	25.169	25.2263	0.649344	1.04573	0	0	0.64846	1	1.12033	-0.120581	0.141608	0	3.08659
ENSRNOG00000000886	Caln1	Calcium-binding protein 8 [Source:UniProtKB/Swiss-Prot;Acc:Q06BI3]	12	26.8604	27.2875	26.2381	26.8609	NA	NA	0	0	0.38678	1	1.15492	0.0631158	0.4429	0	4.33087
ENSRNOG00000000888	Sbds	Ribosome maturation protein SBDS [Source:UniProtKB/Swiss-Prot;Acc:Q5RK30]	12	27.4573	27.4665	27.1086	27.1219	0.603505	0.979871	0	0	0.95033	1	1.00187	0.0718859	0.382017	0	4.5284
ENSRNOG00000000891	F1LYH2_RAT		12	4.80985	4.81403	0	0	NA	NA	0	0	0.370097	1	1.1416	0.132273	0.106625	0	2.99531
ENSRNOG00000000893	MGC94190	Transmembrane protein 248 [Source:UniProtKB/Swiss-Prot;Acc:Q6AY76]	12	27.4698	27.4945	27.1268	27.1628	0.0401811	0.925811	0	0	0.342648	1	0.907108	-0.0214943	0.794032	0	3.49621
ENSRNOG00000000894	Fry	furry homolog (Drosophila) [Source:MGI Symbol;Acc:MGI:2443895]	12	4.88688	5.13596	0	0	0.560061	0.974333	0	0	0.545358	1	1.06892	-0.0974231	0.235612	0	4.12765
ENSRNOG00000000895	Rabgef1	rab5 GDP/GTP exchange factor [Source:RefSeq peptide;Acc:NP_001101803]	12	27.4975	27.5254	27.1673	27.2079	0.133984	1.14103	0	0	0.898952	1	1.01132	-0.211108	0.00950869	0	2.959
ENSRNOG00000000899	F1M387_RAT	beta 1,3-galactosyltransferase-like [Source:MGI Symbol;Acc:MGI:2685903]	12	5.66768	5.75008	0	0	NA	NA	0	0	0.581312	1	1.13882	-0.0353154	0.667895	0	2.14364
ENSRNOG00000000900	Tpst1	Protein-tyrosine sulfotransferase 1 [Source:UniProtKB/Swiss-Prot;Acc:Q3KR92]	12	27.5854	27.6486	27.2954	27.3875	0.0687213	0.904749	0	0	0.633279	1	0.967908	-0.12069	0.141247	0	3.0924
ENSRNOG00000000901	Crcp	DNA-directed RNA polymerase III subunit RPC9 [Source:RefSeq peptide;Acc:NP_446122]	12	27.6669	27.6931	27.4143	27.4525	0.318449	1.07789	0	0	0.517973	1	1.11528	-0.1799	0.0276028	0	3.64837
ENSRNOG00000000902	Hsph1	Heat shock protein 105 kDa [Source:UniProtKB/Swiss-Prot;Acc:Q66HA8]	12	5.79814	5.81145	0	0	0.0651562	1.1148	0	0	0.888229	1	0.992402	-0.284041	0.000427469	0	6.24148
ENSRNOG00000000903	ARLY_RAT	argininosuccinate lyase [Source:RefSeq peptide;Acc:NP_067588]	12	27.7029	27.7202	27.4667	27.492	NA	NA	0	0	0.802992	1	1.00492	-0.0826935	0.314398	0	1.8288
ENSRNOG00000000906	RGD1307396	Protein RGD1307396 [Source:UniProtKB/TrEMBL;Acc:D3ZTT1]	12	6.10529	6.12633	0	0	NA	NA	0	0	0.267682	1	1.21458	-0.162955	0.0463245	0	1.66243
ENSRNOG00000000907	Alox5ap	Arachidonate 5-lipoxygenase-activating protein [Source:UniProtKB/Swiss-Prot;Acc:P20291]	12	6.24581	6.2698	0	0	0.361242	0.918841	0	0	0.779209	1	0.900293	-0.0990196	0.227988	0	1.19843
ENSRNOG00000000909	Uspl1	ubiquitin-specific peptidase-like protein 1 isoform 2 [Source:RefSeq peptide;Acc:NP_001099376]	12	6.31858	6.34586	0	0	0.796222	0.991234	0	0	0.896719	1	1.0266	-0.311282	0.000105625	0	2.96556
ENSRNOG00000000913	BGLR_RAT	beta-glucuronidase precursor [Source:RefSeq peptide;Acc:NP_058711]	12	27.7412	27.7708	27.5225	27.5658	NA	NA	0	0	0.274345	1	0.815302	0.0535687	0.515009	0	1.14055
ENSRNOG00000000916	Katnal1	Katanin p60 ATPase-containing subunit A-like 1 [Source:UniProtKB/Swiss-Prot;Acc:Q5XIK7]	12	6.60462	6.65779	0	0	0.523788	0.941264	0	0	0.763834	1	1.05987	0.0112272	0.891538	0	3.04349
ENSRNOG00000000917	RGD1560258	nuclear transcriptional regulator 1-like protein [Source:RefSeq peptide;Acc:NP_001128042]	12	27.8505	27.8509	27.682	27.6825	0.198736	1.09455	0	0	0.332473	1	1.49819	-0.00613361	0.940618	0	2.16554
ENSRNOG00000000918	Scand3	zinc finger BED domain-containing protein 5 [Source:RefSeq peptide;Acc:NP_001099394]	12	27.8558	27.8619	27.6898	27.6986	NA	NA	0	0	0.492717	1	1.13495	0.00637718	0.938264	0	1.81425
ENSRNOG00000000920	Phkg1	Phosphorylase b kinase gamma catalytic chain, skeletal muscle isoform [Source:UniProtKB/Swiss-Prot;Acc:P13286]	12	28.0296	28.0435	27.9348	27.9511	NA	NA	0	0	0.597974	1	0.936552	0.0446154	0.587734	0	1.30117
ENSRNOG00000000921	Ubl3	Ubiquitin-like protein 3 [Source:UniProtKB/Swiss-Prot;Acc:Q5BJT2]	12	7.01949	7.06382	0	0	0.666021	1.0155	0	0	0.587815	1	1.04969	-0.118076	0.150129	0	5.75573
ENSRNOG00000000922	D3ZTR4_RAT	sulfatase-modifying factor 2 precursor [Source:RefSeq peptide;Acc:NP_001020296]	12	28.0035	28.0289	27.9041	27.934	0.0480779	0.928768	0	0	0.221234	1	0.82277	0.0436784	0.595608	0	2.03746
ENSRNOG00000000923	Cct6a	T-complex protein 1 subunit zeta [Source:RefSeq peptide;Acc:NP_001028856]	12	27.9923	28.0026	27.8888	27.903	NA	NA	0	0	0.434847	1	1.07653	-0.248216	0.00219383	0	5.05515
ENSRNOG00000000924	Slc7a1	high affinity cationic amino acid transporter 1 [Source:RefSeq peptide;Acc:NP_037243]	12	7.23052	7.25386	0	0	0.678089	0.987203	0	0	0.445526	1	0.895714	-0.00604827	0.941443	0	3.14641
ENSRNOG00000000925	Psph	Phosphoserine phosphatase [Source:UniProtKB/Swiss-Prot;Acc:Q5M819]	12	27.9698	27.9843	27.8559	27.8771	0.00187502	0.796148	1	0	0.67278	1	0.974041	-0.0107294	0.89632	0	2.48796
ENSRNOG00000000926	Mrps17	28S ribosomal protein S17, mitochondrial [Source:RefSeq peptide;Acc:NP_001099393]	12	27.9207	27.9241	27.7843	27.7893	0.2667	0.947776	0	0	0.697006	1	0.921849	-0.197565	0.0153779	0	3.20083
ENSRNOG00000000929	D3ZTQ4_RAT	NA	8	19.3739	19.3867	11.0561	11.0642	NA	NA	0	0	0.839234	1	1.02203	0.0395573	0.630792	0	1.65607
ENSRNOG00000000931	D3ZTQ1_RAT	Splicing factor, suppressor of white-apricot homolog [Source:UniProtKB/Swiss-Prot;Acc:D3ZTQ1]	12	28.1791	28.2494	28.1104	28.1931	0.898472	0.996354	0	0	0.541486	1	1.05506	0.0051149	0.950467	0	3.35458
ENSRNOG00000000936	Stx2	Syntaxin-2 [Source:UniProtKB/Swiss-Prot;Acc:P50279]	12	28.7516	28.7752	28.7831	28.8109	NA	NA	0	0	0.692687	1	0.938721	-0.0162336	0.843694	0	2.35311
ENSRNOG00000000937	Slc46a3	Solute carrier family 46 member 3 [Source:UniProtKB/Swiss-Prot;Acc:Q5BK75]	12	7.69889	7.7153	0	0	NA	NA	0	0	0.196854	1	0.701099	-0.0191831	0.815761	0	1.27465
ENSRNOG00000000938	Ran	GTP-binding nuclear protein Ran [Source:UniProtKB/Swiss-Prot;Acc:P62828]	12	28.7368	28.7399	28.7657	28.7694	0.694746	1.00884	0	0	0.671741	1	1.04581	-0.152791	0.0619547	0	6.24042
ENSRNOG00000000939	Pomp	NA	12	7.71963	7.73259	0	0	0.288063	1.04173	0	0	0.676475	1	0.889032	-0.110604	0.177844	0	5.76827
ENSRNOG00000000940	Flt1	vascular endothelial growth factor receptor 1 precursor [Source:RefSeq peptide;Acc:NP_062179]	12	7.85809	8.03597	0	0.0453172	0.838945	1.00833	0	0	0.651373	1	0.921763	-0.0286129	0.72816	0	2.74479
ENSRNOG00000000942	Pan3		12	8.04804	8.14645	0.0605317	0.184524	NA	NA	0	0	0.312327	1	0.835611	-0.0804623	0.327678	0	2.89354
ENSRNOG00000000949	Flt3	FL cytokine receptor precursor [Source:RefSeq peptide;Acc:NP_001094292]	12	8.20979	8.26853	0.26434	0.338345	NA	NA	0	0	0.838704	1	0.931158	0.021057	0.798132	0	1.70029
ENSRNOG00000000954	Rpo1-3	RNA polymerase 1-3 [Source:RefSeq peptide;Acc:NP_001032876]	12	8.42146	8.45485	0.531043	0.573105	0.226719	1.05152	0	0	0.811795	1	1.02405	-0.0707623	0.389521	0	4.64172
ENSRNOG00000000955	Lnx2	ligand of Numb protein X 2 [Source:RefSeq peptide;Acc:NP_001101799]	12	8.35954	8.42039	0.45302	0.529695	NA	NA	0	0	0.495421	1	1.17132	-0.105703	0.197967	0	1.38842
ENSRNOG00000000956	Rasl11a	Ras-like protein family member 11A [Source:UniProtKB/Swiss-Prot;Acc:Q6IMA3]	12	8.70599	8.71004	0.889551	0.89465	NA	NA	0	0	0.0436122	1	1.55894	-0.00841283	0.918617	0	1.73999
ENSRNOG00000000957	Rpl21	60S ribosomal protein L21; 60S ribosomal protein L21; Protein LOC100360604; RCG42727, isoform CRA_a; Ribosomal protein L21 [Source:UniProtKB/TrEMBL;Acc:Q6PDW2]	12	8.71668	8.71975	0.903011	0.90689	NA	NA	0	0	0.578299	1	0.854248	0.0906263	0.270059	0	5.11073
ENSRNOG00000000958	Usp12		7	4.29257	4.29368	0.47125	0.471479	NA	NA	0	0	0.992719	1	0.955528	-0.0750487	0.361372	0	2.03736
ENSRNOG00000000961	Glt1d1	Protein Glt1d1 [Source:UniProtKB/TrEMBL;Acc:D3ZRH0]	12	30.0263	30.0983	30.2809	30.3655	NA	NA	0	0	1	1	1.04257	0.0423468	0.60688	0	2.81912
ENSRNOG00000000962	Slc15a4	Solute carrier family 15 member 4 [Source:UniProtKB/Swiss-Prot;Acc:O09014]	12	30.1119	30.1311	30.3814	30.4041	0.850096	0.975316	0	0	0.935345	1	1.03398	0.048676	0.554172	0	2.70494
ENSRNOG00000000963	Tmem132c		12	30.1657	30.3708	30.4447	30.6857	NA	NA	0	0	0.438753	1	1.18231	-0.0399574	0.627339	0	0.824959
ENSRNOG00000000964	Frg1	Protein Frg1; RCG63649 [Source:UniProtKB/TrEMBL;Acc:D3ZRG9]	12	31.3304	31.3312	31.8132	31.8142	NA	NA	0	0	0.764007	1	1.01164	-0.170024	0.0375157	0	3.21649
ENSRNOG00000000967	Aacs	Acetoacetyl-CoA synthetase [Source:UniProtKB/Swiss-Prot;Acc:Q9JMI1]	12	32.2069	32.2506	32.8431	32.8945	0.394114	1.0506	0	0	0.618874	1	1.10753	-0.102467	0.212124	0	2.92647
ENSRNOG00000000968	Rnf6	RING finger protein 6 [Source:RefSeq peptide;Acc:NP_001100588]	12	9.19366	9.23355	1.50401	1.55428	0.0277874	0.562667	0	0	0.816838	1	1.01021	0.00740122	0.928375	0	4.2121
ENSRNOG00000000974	Zfp358	zinc finger protein 358 [Source:RefSeq peptide;Acc:NP_001101798]	12	2.65862	2.66272	0	0	NA	NA	0	0	0.863914	1	1.03969	0.0497871	0.545152	0	3.11482
ENSRNOG00000000975	Mcoln1	mucolipin-1 [Source:RefSeq peptide;Acc:NP_001099373]	12	2.64003	2.65392	0	0	NA	NA	0	0	0.373563	1	0.902538	-0.0998107	0.224275	0	4.0289
ENSRNOG00000000977	Pnpla6		12	2.61078	2.63985	0	0	NA	NA	0	0	0.552229	1	1.1514	0.0372088	0.651228	0	3.00025
ENSRNOG00000000979	Bri3bp	BRI3-binding protein precursor [Source:RefSeq peptide;Acc:NP_001017487]	12	32.2709	32.2827	32.9183	32.9322	NA	NA	0	0	0.995658	1	1.01988	-0.139939	0.0876419	0	3.47133
ENSRNOG00000000981	Scarb1	Scavenger receptor class B member 1 [Source:UniProtKB/Swiss-Prot;Acc:P97943]	12	32.3902	32.4577	33.0585	33.1377	0.0958377	1.11973	0	0	0.589598	1	0.973456	-0.057071	0.487875	0	3.72132
ENSRNOG00000000982	Zkscan5	zinc finger protein with KRAB and SCAN domains 5 [Source:RefSeq peptide;Acc:NP_001100589]	12	9.69774	9.71877	2.13915	2.16565	0.038161	1.25902	0	0	0.91563	1	1.03166	-0.112663	0.169857	0	2.21155
ENSRNOG00000000983	Znf394	zinc finger protein 394 [Source:RefSeq peptide;Acc:NP_663776]	12	9.7221	9.73009	2.16985	2.17991	NA	NA	0	0	0.576691	1	1.20565	-0.0248705	0.762577	0	1.67531
ENSRNOG00000000985	CPSF4_RAT	Cleavage and polyadenylation specificity factor subunit 4 [Source:UniProtKB/Swiss-Prot;Acc:Q5FVR7]	12	9.74366	9.7593	2.19701	2.21672	NA	NA	0	0	0.603179	1	0.92249	-0.212522	0.00902858	0	2.53877
ENSRNOG00000000986	D3ZXQ2_RAT	calmodulin-regulated spectrin-associated protein 3 [Source:RefSeq peptide;Acc:NP_001138312]	12	2.54668	2.57284	0	0	0.459102	1.05689	0	0	0.558618	1	1.11185	-0.0852625	0.299548	0	2.18759
ENSRNOG00000000987	Ptcd1	pentatricopeptide repeat-containing protein 1, mitochondrial [Source:RefSeq peptide;Acc:NP_001103135]	12	9.75985	9.77753	2.21741	2.23968	0.165691	0.940254	0	0	0.623585	1	1.10451	0.0360887	0.661067	0	1.88651
ENSRNOG00000000988	Xab2	Pre-mRNA-splicing factor SYF1 [Source:UniProtKB/Swiss-Prot;Acc:Q99PK0]	12	2.53369	2.54569	0	0	0.206417	0.946721	0	0	0.644397	1	1.12306	0.0477639	0.561629	0	3.01592
ENSRNOG00000000989	Bud31		12	9.77693	9.78349	2.23894	2.2472	0.734305	1.01414	0	0	0.15734	1	1.14134	-0.0149216	0.856185	0	4.7394
ENSRNOG00000000990	Pdap1	28 kDa heat- and acid-stable phosphoprotein [Source:UniProtKB/Swiss-Prot;Acc:Q62785]	12	9.78473	9.79497	2.24876	2.26166	0.725682	1.00948	0	0	0.813709	1	1.0128	0.114053	0.164616	0	5.8505
ENSRNOG00000000991	Arpc1b	Actin-related protein 2/3 complex subunit 1B [Source:UniProtKB/Swiss-Prot;Acc:O88656]	12	9.79627	9.80362	2.2633	2.27256	NA	NA	0	0	0.418213	1	0.877938	-0.17242	0.0348695	0	2.4745
ENSRNOG00000000993	Pcp2	Purkinje cell protein 2 [Source:RefSeq peptide;Acc:NP_001100586]	12	2.52947	2.53171	0	0	0.469156	0.803544	0	0	0.035656	1	1.76035	0.0264954	0.747571	0	1.41729
ENSRNOG00000000994	Stxbp2	syntaxin-binding protein 2 [Source:RefSeq peptide;Acc:NP_112388]	12	2.51179	2.52281	0	0	NA	NA	0	0	0.167424	1	0.836814	0.0425637	0.605037	0	0.903303
ENSRNOG00000000996	D4A992_RAT	Actin-related protein 2/3 complex subunit 1A [Source:UniProtKB/Swiss-Prot;Acc:Q99PD4]	12	9.82144	9.83912	2.29501	2.31729	NA	NA	0	0	0.732338	1	1.04893	-0.0576648	0.483351	0	5.46782
ENSRNOG00000000999	Smurf1	E3 ubiquitin-protein ligase SMURF1 [Source:RefSeq peptide;Acc:NP_001103068]	12	9.9503	10.0424	2.45738	2.57341	NA	NA	0	0	0.389418	1	1.1043	-0.0412588	0.616159	0	3.29275
ENSRNOG00000001003	Trappc5	trafficking protein particle complex subunit 5 [Source:RefSeq peptide;Acc:NP_001102320]	12	2.47124	2.47478	0	0	0.207948	0.963356	0	0	0.806957	1	1.05214	0.144956	0.0767524	0	3.67826
ENSRNOG00000001004	Ncor2	nuclear receptor corepressor 2 [Source:RefSeq peptide;Acc:NP_001101804]	12	32.5628	32.7258	33.2613	33.4528	0.459575	1.04518	0	0	0.525189	1	1.16197	0.0341544	0.678196	0	3.92542
ENSRNOG00000001006	Nptx2	neuronal pentraxin-2 precursor [Source:RefSeq peptide;Acc:NP_001029371]	12	10.3594	10.3703	2.97285	2.9866	NA	NA	0	0	0.877848	1	1.0014	-0.0520699	0.526852	0	4.26996
ENSRNOG00000001007	Baiap2l1	Brain-specific angiogenesis inhibitor 1-associated protein 2-like protein 1 [Source:UniProtKB/Swiss-Prot;Acc:Q3KR97]	12	10.5847	10.8131	3.25678	3.54454	NA	NA	0	0	0.948786	1	0.773534	-0.0369635	0.653378	0	0.586638
ENSRNOG00000001009	Bri3	Brain protein I3 [Source:UniProtKB/Swiss-Prot;Acc:Q5PPK1]	12	10.67	10.6787	3.36423	3.37517	0.133497	1.10413	0	0	0.88659	1	0.971135	0.0957981	0.243553	0	4.16158
ENSRNOG00000001010	Tecpr1	Tectonin beta-propeller repeat-containing protein 1 [Source:UniProtKB/Swiss-Prot;Acc:Q3ZBA0]	12	10.7191	10.747	3.42606	3.46123	NA	NA	0	0	0.446565	1	1.1038	0.022177	0.787643	0	3.92857
ENSRNOG00000001019	Tect2	Tectonic-2 [Source:UniProtKB/Swiss-Prot;Acc:Q3B7D3]	12	33.0572	33.1199	33.8422	33.9159	0.85802	1.00779	0	0	1	1	1.00943	0.0986498	0.229738	0	2.89457
ENSRNOG00000001025	LOC688812	NA	12	1.82528	1.82666	0	0	NA	NA	0	0	0.736075	1	1.00231	-0.0565092	0.492175	0	1.20403
ENSRNOG00000001030	Tsc22d1	TSC22 domain family protein 1 [Source:UniProtKB/Swiss-Prot;Acc:P62501]	15	57.4053	57.5028	32.5595	32.647	NA	NA	0	0	0.65475	1	1.03837	-0.0209396	0.799233	0	7.17432
ENSRNOG00000001031	Ocm	Oncomodulin [Source:UniProtKB/Swiss-Prot;Acc:P02631]	12	10.9198	10.9256	3.67891	3.68625	NA	NA	0	0	0.443723	1	1.43311	0.0772888	0.347177	0	0.906571
ENSRNOG00000001032	F1MAF6_RAT	vacuolar fusion protein CCZ1 homolog [Source:RefSeq peptide;Acc:NP_001014148]	12	10.9299	10.9539	3.69166	3.72196	0.161273	0.9374	0	0	0.948464	1	0.968283	-0.121063	0.140012	0	3.3849
ENSRNOG00000001033	Nufip1	Nuclear fragile X mental retardation-interacting protein 1 [Source:UniProtKB/Swiss-Prot;Acc:Q641W3]	15	57.0281	57.0588	32.2215	32.249	0.182614	0.952322	0	0	0.951824	1	0.946466	-0.196937	0.0157135	0	2.95255
ENSRNOG00000001034	D3ZXM4_RAT	Uncharacterized protein [Source:UniProtKB/TrEMBL;Acc:D3ZXM4]	12	1.58767	1.62526	0	0	NA	NA	0	0	0.631218	1	1.08573	0.129538	0.114128	0	3.75672
ENSRNOG00000001035	Gtf2h3	General transcription factor IIH subunit 3 [Source:UniProtKB/Swiss-Prot;Acc:Q561R7]	12	33.1219	33.1382	33.9182	33.9374	0.183528	0.919246	0	0	0.737139	1	1.06377	-0.17409	0.0331209	0	2.60977
ENSRNOG00000001036	D3ZTH2_RAT	Radial spoke head 10 homolog B [Source:UniProtKB/Swiss-Prot;Acc:Q66HB5]	12	10.9568	11.0029	3.72563	3.7836	NA	NA	0	0	0.245494	1	1.24422	0.0981289	0.23222	0	2.05312
ENSRNOG00000001037	RGD1307254	Uncharacterized protein KIAA1704 homolog [Source:UniProtKB/Swiss-Prot;Acc:Q4V893]	15	57.0105	57.028	32.2057	32.2214	NA	NA	0	0	0.545641	1	1.09208	-0.131912	0.107593	0	3.12434
ENSRNOG00000001039	Eif2b1	Translation initiation factor eIF-2B subunit alpha [Source:UniProtKB/Swiss-Prot;Acc:Q64270]	12	33.1383	33.1466	33.9375	33.9473	NA	NA	0	0	0.375571	1	0.880996	0.0392498	0.633453	0	2.90717
ENSRNOG00000001040	Pms2	mismatch repair endonuclease PMS2 [Source:RefSeq peptide;Acc:NP_001099378]	12	11.0045	11.0288	3.78568	3.81623	0.163518	0.901526	0	0	0.793378	1	1.02228	0.0426437	0.604358	0	2.50367
ENSRNOG00000001041	Kctd4	NA	15	56.8729	56.8737	32.0824	32.0831	NA	NA	0	0	0.910235	1	0.962863	-0.0692014	0.400091	0	3.31904
ENSRNOG00000001043	LOC100362764	DEAD (Asp-Glu-Ala-Asp) box polypeptide 55 [Source:RefSeq peptide;Acc:NP_001258255]	12	33.1477	33.163	33.9486	33.9665	NA	NA	0	0	0.815332	1	0.96974	-0.0055807	0.945962	0	2.24909
ENSRNOG00000001044	Aimp2	Aminoacyl tRNA synthase complex-interacting multifunctional protein 2 [Source:UniProtKB/Swiss-Prot;Acc:Q32PX2]	12	11.0289	11.0385	3.81642	3.82846	0.9757	1.0018	0	0	0.709386	1	1.0726	-0.104376	0.203684	0	3.73328
ENSRNOG00000001047	Map2k7	Dual specificity mitogen-activated protein kinase kinase 7 [Source:UniProtKB/Swiss-Prot;Acc:Q4KSH7]	12	1.54347	1.55235	0	0	NA	NA	0	0	0.931038	1	1.01176	0.184378	0.0239038	0	3.62195
ENSRNOG00000001048	Ankrd61	Ankyrin repeat domain-containing protein 61 [Source:UniProtKB/Swiss-Prot;Acc:Q641X1]	12	11.0471	11.0515	3.83936	3.84485	NA	NA	0	0	0.657115	1	0.930985	-0.034526	0.674892	0	1.15007
ENSRNOG00000001049	Tpt1	Translationally-controlled tumor protein [Source:UniProtKB/Swiss-Prot;Acc:P63029]	15	56.7525	56.7553	31.9744	31.977	NA	NA	0	0	0.489159	1	1.07982	-0.0409245	0.619022	0	7.44724
ENSRNOG00000001050	Eif2ak1	Eukaryotic translation initiation factor 2-alpha kinase 1 [Source:UniProtKB/Swiss-Prot;Acc:Q63185]	12	11.0391	11.0727	3.82933	3.87165	0.0183819	1.21248	0	0	0.628725	1	1.07651	-0.107159	0.191824	0	4.08291
ENSRNOG00000001052	KMCP1_RAT	solute carrier family 25, member 30 [Source:MGI Symbol;Acc:MGI:1914804]	15	56.6545	56.6889	31.8866	31.9175	0.0118052	0.855361	0	0	0.549268	1	0.90567	-0.0634695	0.440342	0	2.16175
ENSRNOG00000001053	Tmed2	Transmembrane emp24 domain-containing protein 2 [Source:UniProtKB/Swiss-Prot;Acc:Q63524]	12	33.1653	33.1743	33.9692	33.9798	0.137161	0.971616	0	0	0.759619	1	1.00609	-0.132518	0.105972	0	5.74232
ENSRNOG00000001055	Rilpl1	RILP-like protein 1 [Source:UniProtKB/Swiss-Prot;Acc:D3ZUQ0]	12	33.1848	33.2215	33.9922	34.0353	NA	NA	0	0	0.691901	1	1.03868	0.0212116	0.796682	0	3.88723
ENSRNOG00000001056	Snapc2	snRNA-activating protein complex subunit 2 [Source:UniProtKB/Swiss-Prot;Acc:Q68FX5]	12	1.53531	1.53806	0	0	NA	NA	0	0	0.588642	1	0.952358	-0.00784391	0.924104	0	4.12129
ENSRNOG00000001057	Ctxn1	Cortexin-1 [Source:UniProtKB/Swiss-Prot;Acc:P41237]	12	1.53182	1.53343	0	0	0.203683	1.07537	0	0	0.601784	1	1.07563	-0.147297	0.0720583	0	7.97699
ENSRNOG00000001058	Timm44	mitochondrial import inner membrane translocase subunit TIM44 [Source:RefSeq peptide;Acc:NP_058963]	12	1.51462	1.53132	0	0	NA	NA	0	0	0.812488	1	1.02443	0.0368763	0.654142	0	3.27175
ENSRNOG00000001059	Usp42	Ubiquitin carboxyl-terminal hydrolase 42 [Source:UniProtKB/Swiss-Prot;Acc:D3ZU96]	12	11.1515	11.1701	3.97093	3.99429	0.581498	1.01683	0	0	0.829883	1	1.02021	-0.00242322	0.976522	0	2.19783
ENSRNOG00000001060	Snrnp35	U11/U12 small nuclear ribonucleoprotein 35 kDa protein [Source:RefSeq peptide;Acc:NP_001014149]	12	33.2245	33.2318	34.0388	34.0474	NA	NA	0	0	0.490146	1	1.15721	0.0420624	0.6093	0	3.66523
ENSRNOG00000001061	Rilpl2	RILP-like protein 2 [Source:UniProtKB/Swiss-Prot;Acc:Q6AYA0]	12	33.109	33.2625	33.903	34.0835	0.0752573	1.1339	0	0	0.0968808	1	1.24845	0.115975	0.157571	0	2.97308
ENSRNOG00000001062	RGD1561318	histone-lysine N-methyltransferase SETD8 [Source:RefSeq peptide;Acc:NP_001233594]	12	33.2538	33.2717	34.0733	34.0942	NA	NA	0	0	0.381344	1	1.12017	-0.189662	0.0200943	0	3.26263
ENSRNOG00000001064	Sbno1	sno, strawberry notch homolog 1 (Drosophila) [Source:MGI Symbol;Acc:MGI:2384298]	12	33.2899	33.3453	34.1156	34.1807	NA	NA	0	0	0.751439	1	0.991029	-0.0877853	0.285423	0	4.55233
ENSRNOG00000001065	Cyth3	Cytohesin-3 [Source:UniProtKB/Swiss-Prot;Acc:P97696]	12	11.1694	11.1981	3.99348	4.02967	0.164165	1.03617	0	0	0.449266	1	1.09861	-0.00432731	0.958086	0	3.19591
ENSRNOG00000001068	Rac1	Ras-related C3 botulinum toxin substrate 1 [Source:UniProtKB/Swiss-Prot;Acc:Q6RUV5]	12	11.3803	11.4005	4.2592	4.28467	0.00131348	0.905563	1	0	0.890413	1	0.977426	-0.0774915	0.34591	0	6.49737
ENSRNOG00000001069	Elavl1	ELAV-like protein 1 [Source:RefSeq peptide;Acc:NP_001102318]	12	1.45904	1.50004	0	0	0.0157692	1.63131	0	0	0.928598	1	0.98567	0.0511081	0.534525	0	3.56255
ENSRNOG00000001070	Cdk2ap1	cyclin-dependent kinase 2-associated protein 1 [Source:RefSeq peptide;Acc:NP_001107223]	12	33.3654	33.3746	34.2043	34.2151	0.654625	0.985281	0	0	1	1	0.937769	-0.339226	2.17127179216593e-05	1	5.37684
ENSRNOG00000001071	Higd2al1	Protein Higd2al1 [Source:UniProtKB/TrEMBL;Acc:D3ZU87]	12	1.3663	1.36662	0	0	NA	NA	0	0	0.502331	1	1.08751	-0.0643194	0.434233	0	3.39314
ENSRNOG00000001072	Lass4	LAG1 longevity assurance homolog 4 [Source:RefSeq peptide;Acc:NP_001100587]	12	1.2564	1.29158	0	0	NA	NA	0	0	0.081588	1	1.23629	0.129414	0.114479	0	3.46857
ENSRNOG00000001073	RGD1563482	uncharacterized protein LOC498179 [Source:RefSeq peptide;Acc:NP_001102535]	12	33.3746	33.3914	34.2151	34.2349	NA	NA	0	0	0.00953245	1	1.57623	0.0499685	0.543687	0	2.19968
ENSRNOG00000001074	Mphosph9	M-phase phosphoprotein 9 [Source:RefSeq peptide;Acc:NP_001164025]	12	33.394	33.4578	34.2379	34.313	NA	NA	0	0	0.276803	1	0.811754	-0.176913	0.0303327	0	1.58599
ENSRNOG00000001079	DGLB_RAT	Sn1-specific diacylglycerol lipase beta [Source:UniProtKB/Swiss-Prot;Acc:P0C1S9]	12	11.403	11.4465	4.2878	4.3426	0.672263	1.02277	0	0	1	1	1.02742	0.0166745	0.839505	0	2.89577
ENSRNOG00000001080	Arl6ip4	ADP-ribosylation factor-like protein 6-interacting protein 4 [Source:UniProtKB/Swiss-Prot;Acc:Q4V8I5]	12	33.6038	33.6059	34.4844	34.487	0.0322326	0.841576	0	0	0.797729	1	1.02549	0.0129446	0.875073	0	4.07859
ENSRNOG00000001081	Ogfod2	2-oxoglutarate and iron-dependent oxygenase domain-containing protein 2 [Source:RefSeq peptide;Acc:NP_001099397]	12	33.6065	33.6098	34.4877	34.4916	NA	NA	0	0	0.382162	1	1.17902	0.0778133	0.343905	0	2.03728
ENSRNOG00000001082	Abcb9	ATP-binding cassette sub-family B member 9 [Source:UniProtKB/Swiss-Prot;Acc:Q9QYJ4]	12	33.6234	33.6562	34.5075	34.5461	0.0713972	0.937301	0	0	0.422514	1	1.21962	-0.044786	0.586304	0	3.02958
ENSRNOG00000001083	LOC100360920	ER lumen protein retaining receptor 2 [Source:UniProtKB/Swiss-Prot;Acc:Q5U305]	12	11.4981	11.5136	4.40762	4.42708	NA	NA	0	0	0.856277	1	0.95868	0.0889694	0.27895	0	4.03885
ENSRNOG00000001086	Vps37b	vacuolar protein sorting-associated protein 37B [Source:RefSeq peptide;Acc:NP_001099398]	12	33.6844	33.7131	34.5791	34.6129	0.598209	1.01802	0	0	0.657638	1	1.05811	-0.11027	0.179166	0	3.49305
ENSRNOG00000001088	Rfc3	replication factor C subunit 3 [Source:RefSeq peptide;Acc:NP_001009629]	12	3.2245	3.23526	0	0	NA	NA	0	0	0.704743	1	1.00306	0.0733509	0.372367	0	1.61655
ENSRNOG00000001089	Zdhhc4	probable palmitoyltransferase ZDHHC4 [Source:RefSeq peptide;Acc:NP_001013141]	12	11.5949	11.6058	4.52961	4.54327	0.416705	0.94664	0	0	0.866237	1	1.07842	0.0261825	0.750454	0	2.80386
ENSRNOG00000001090	Stard13	stAR-related lipid transfer protein 13 [Source:RefSeq peptide;Acc:NP_001102530]	12	3.5024	3.69614	0	0	0.22829	1.08181	0	0	0.15629	1	1.30905	0.0353883	0.66725	0	1.33607
ENSRNOG00000001091	Hip1r	huntingtin interacting protein 1 related isoform 1 [Source:RefSeq peptide;Acc:NP_001128235]	12	33.7142	33.7428	34.6142	34.6478	0.635354	0.96176	0	0	0.606212	1	1.07377	0.0232473	0.777655	0	3.23176
ENSRNOG00000001092	Kl	Klotho Klotho peptide [Source:UniProtKB/Swiss-Prot;Acc:Q9Z2Y9]	12	3.73271	3.77237	0	0	NA	NA	0	0	0.42763	1	1.80343	0.0946176	0.249438	0	2.13694
ENSRNOG00000001094	Zfp316	zinc finger protein 316 [Source:RefSeq peptide;Acc:NP_001100591]	12	11.6607	11.6727	4.61254	4.62761	0.059005	1.10208	0	0	0.453389	1	1.15585	0.0982782	0.231506	0	1.75434
ENSRNOG00000001098	Pds5b	sister chromatid cohesion protein PDS5 homolog B isoform 1 [Source:RefSeq peptide;Acc:NP_001095853]	12	4.03843	4.12835	0	0	0.380041	0.978997	0	0	0.882211	1	0.970763	0.0505623	0.538904	0	4.73207
ENSRNOG00000001099	Rbak	RB-associated KRAB zinc finger protein [Source:RefSeq peptide;Acc:NP_001178593]	12	11.7555	11.7598	4.73195	4.73729	NA	NA	0	0	0.381209	1	0.866188	0.0414241	0.614745	0	1.53066
ENSRNOG00000001101	Rnf216	E3 ubiquitin-protein ligase RNF216 [Source:RefSeq peptide;Acc:NP_001100592]	12	11.8505	11.9561	4.85169	4.98469	NA	NA	0	0	0.681183	1	1.06307	-0.0411183	0.617362	0	3.0042
ENSRNOG00000001103	RGD1560686		12	12.804	13.0877	6.0531	6.41986	NA	NA	0	0	0.953465	1	1.01353	-0.132978	0.104753	0	1.18883
ENSRNOG00000001104	Foxk1	forkhead box K1 [Source:RefSeq peptide;Acc:NP_001032296]	12	12.5131	12.5684	5.68646	5.75618	NA	NA	0	0	0.459449	1	1.18844	-0.115221	0.160306	0	2.52448
ENSRNOG00000001106	E9PTX5_RAT	density-regulated protein [Source:MGI Symbol;Acc:MGI:1915434]	12	33.7975	33.819	34.712	34.7373	0.516722	1.06207	0	0	0.722939	1	1.00765	-0.0051469	0.950157	0	3.81894
ENSRNOG00000001107	D3ZU53_RAT	protein KIAA0415 [Source:RefSeq peptide;Acc:NP_001032297]	12	12.4922	12.5056	5.66012	5.67708	NA	NA	0	0	0.640246	1	1.10774	-0.031237	0.704342	0	2.39475
ENSRNOG00000001108	N4bp2l2	NEDD4-binding protein 2-like 2 [Source:UniProtKB/Swiss-Prot;Acc:Q66H65]	12	4.18442	4.20555	0	0	0.52709	0.960853	0	0	0.929255	1	0.974774	-0.0279604	0.734124	0	3.16127
ENSRNOG00000001110	N4bp2l1	NEDD4-binding protein 2-like 1 [Source:RefSeq peptide;Acc:NP_001030299]	12	4.25657	4.28094	0	0	0.915244	0.992912	0	0	0.540914	1	0.886374	0.0723268	0.379097	0	2.79944
ENSRNOG00000001113	Mmd2	monocyte to macrophage differentiation-associated 2 [Source:RefSeq peptide;Acc:NP_001032294]	12	12.3591	12.4061	5.49243	5.55168	0.00964388	1.0556	0	0	0.751773	1	0.965025	-0.147969	0.0707548	0	5.67542
ENSRNOG00000001114	Wipi2	WD repeat domain phosphoinositide-interacting protein 2 [Source:UniProtKB/Swiss-Prot;Acc:Q6AY57]	12	12.3066	12.335	5.42627	5.46209	0.0382101	0.875944	0	0	0.743342	1	1.04337	-0.177011	0.0302398	0	3.9813
ENSRNOG00000001115	Slc29a4	equilibrative nucleoside transporter 4 [Source:RefSeq peptide;Acc:NP_001099381]	12	12.2413	12.2517	5.34399	5.35711	NA	NA	0	0	0.474304	1	1.26928	-0.0142904	0.862207	0	2.11467
ENSRNOG00000001117	D3ZU50_RAT	Uncharacterized protein [Source:UniProtKB/TrEMBL;Acc:D3ZU50]	12	12.0662	12.0839	5.12341	5.1457	NA	NA	0	0	0.652553	1	1.12362	-0.131697	0.108173	0	1.74351
ENSRNOG00000001120	D3ZJC6_RAT	Uncharacterized protein [Source:UniProtKB/TrEMBL;Acc:F1LZT8]	12	39.1363	39.1812	41.4817	41.5416	0.107068	1.06539	0	0	0.829031	1	1.01275	-0.0222179	0.787261	0	3.34415
ENSRNOG00000001123	RGD1562310	uncharacterized protein LOC498188 [Source:RefSeq peptide;Acc:NP_001102536]	12	39.4413	39.4617	41.8884	41.9156	NA	NA	0	0	0.626019	1	0.938389	-0.14212	0.0827645	0	2.49167
ENSRNOG00000001124	Rnft2	RING finger and transmembrane domain-containing protein 2 [Source:RefSeq peptide;Acc:NP_001100614]	12	39.4643	39.5201	41.919	41.9934	0.112323	0.934879	0	0	0.855676	1	1.02445	0.142883	0.0811115	0	3.78433
ENSRNOG00000001126	Fbxw8	F-box/WD repeat-containing protein 8 [Source:RefSeq peptide;Acc:NP_001100615]	12	39.5743	39.6632	42.0657	42.1842	NA	NA	0	0	0.848413	1	1.05298	-0.0963724	0.240726	0	3.11658
ENSRNOG00000001128	Tesc	Protein Tesc [Source:UniProtKB/TrEMBL;Acc:D3ZTN1]	12	39.6697	39.7036	42.193	42.2381	0.303943	1.0662	0	0	1	1	1.02695	-0.241819	0.0028706	0	4.20946
ENSRNOG00000001129	Fbxo21	F-box only protein 21 [Source:RefSeq peptide;Acc:NP_001101808]	12	39.7197	39.7538	42.2595	42.3051	0.541301	0.968595	0	0	0.660636	1	1.08863	0.069628	0.397184	0	4.3093
ENSRNOG00000001130	Nos1	nitric oxide synthase, brain [Source:RefSeq peptide;Acc:NP_434686]	12	39.8111	39.8695	42.3815	42.4593	NA	NA	0	0	0.685976	1	1.10612	-0.0457852	0.57797	0	2.65874
ENSRNOG00000001134	Rfc5	replication factor C subunit 5 [Source:RefSeq peptide;Acc:NP_001100616]	12	40.3959	40.4055	43.1613	43.174	NA	NA	0	0	0.95368	1	1.0305	0.0385813	0.639252	0	1.93971
ENSRNOG00000001135	Wsb2	WD repeat and SOCS box-containing protein 2 [Source:RefSeq peptide;Acc:NP_001007617]	12	40.4069	40.4271	43.1759	43.2028	0.824084	1.01145	0	0	0.621053	1	0.954131	0.0188329	0.819067	0	6.05418
ENSRNOG00000001136	Pebp1	Phosphatidylethanolamine-binding protein 1 Hippocampal cholinergic neurostimulating peptide [Source:UniProtKB/Swiss-Prot;Acc:P31044]	12	40.4914	40.4956	43.2885	43.2941	0.879671	1.00379	0	0	0.535574	1	1.11734	0.101839	0.214952	0	7.4482
ENSRNOG00000001138	Taok3	serine/threonine-protein kinase TAO3 [Source:RefSeq peptide;Acc:NP_001019425]	12	40.5025	40.6516	43.3033	43.5021	NA	NA	0	0	0.429376	1	1.11101	-0.0648918	0.430145	0	3.60559
ENSRNOG00000001139	Suds3	suppressor of defective silencing 3 homolog (S. cerevisiae) [Source:MGI Symbol;Acc:MGI:1919204]	12	40.6688	40.6895	43.525	43.5526	NA	NA	0	0	0.808376	1	1.02193	0.009732	0.905911	0	4.44078
ENSRNOG00000001141	Srrm4	serine/arginine repetitive matrix 4 [Source:MGI Symbol;Acc:MGI:1916205]	12	41.3306	41.3731	44.4075	44.4641	NA	NA	0	0	0.414323	1	1.1698	0.0346771	0.67355	0	2.5422
ENSRNOG00000001142	Prkab1	5'-AMP-activated protein kinase subunit beta-1 [Source:UniProtKB/Swiss-Prot;Acc:P80386]	12	41.8409	41.8512	45.0878	45.1017	0.110424	0.848251	0	0	0.939726	1	1.00707	-0.121255	0.13938	0	2.35355
ENSRNOG00000001143	Cit	citron Rho-interacting kinase [Source:RefSeq peptide;Acc:NP_001025082]	12	41.8577	42.0196	45.1102	45.3	NA	NA	0	0	0.528315	1	1.07024	-0.0580169	0.48068	0	4.35613
ENSRNOG00000001145	Ccdc64	bicaudal D-related protein 1 [Source:RefSeq peptide;Acc:NP_001178596]	12	42.1392	42.2265	45.3	45.3	NA	NA	0	0	0.473593	1	1.1218	0.0309098	0.707296	0	3.62514
ENSRNOG00000001148	Rplp0	60S acidic ribosomal protein P0 [Source:UniProtKB/Swiss-Prot;Acc:P19945]	12	42.3158	42.3188	45.3	45.3	NA	NA	0	0	0.820275	1	0.985742	0.0229699	0.78024	0	6.79743
ENSRNOG00000001149	Pxn	Paxillin [Source:UniProtKB/Swiss-Prot;Acc:Q66H76]	12	42.3222	42.3705	45.3	45.3	0.340614	1.05405	0	0	0.631693	1	1.03796	0.046619	0.571057	0	3.01085
ENSRNOG00000001151	Sirt4	NAD-dependent ADP-ribosyltransferase sirtuin-4 [Source:RefSeq peptide;Acc:NP_001100617]	12	42.3945	42.4027	45.3	45.3	NA	NA	0	0	0.835787	1	1.03626	0.0147029	0.858271	0	0.91249
ENSRNOG00000001156	Msi1	RNA-binding protein Musashi homolog 1 [Source:UniProtKB/Swiss-Prot;Acc:Q8K3P4]	12	42.426	42.4471	45.3	45.3	NA	NA	0	0	0.516163	1	1.13308	0.131099	0.109796	0	3.01917
ENSRNOG00000001158	Abcg1	ATP-binding cassette sub-family G member 1 [Source:RefSeq peptide;Acc:NP_445954]	20	9.39048	9.45957	0	0	0.41917	1.04075	0	0	0.775621	1	1.02878	0.0029388	0.971528	0	4.06575
ENSRNOG00000001160	Triap1	TP53-regulated inhibitor of apoptosis 1 [Source:RefSeq peptide;Acc:NP_001119571]	12	42.5357	42.5381	45.3	45.3	0.191507	1.07997	0	0	0.54819	1	0.863972	-0.060369	0.46304	0	2.94144
ENSRNOG00000001161	Gatc	Glutamyl-tRNA(Gln) amidotransferase subunit C, mitochondrial [Source:UniProtKB/Swiss-Prot;Acc:D3ZY68]	12	42.5382	42.5462	45.3	45.3	0.94574	0.997835	0	0	0.870915	1	0.980968	0.182718	0.0252224	0	3.47691
ENSRNOG00000001163	Sfrs9	Serine/arginine-rich splicing factor 9 [Source:UniProtKB/Swiss-Prot;Acc:Q5PPI1]	12	42.5463	42.5526	45.3	45.3	0.387799	1.06532	0	0	0.444568	1	1.10967	-0.0154158	0.851476	0	2.70047
ENSRNOG00000001168	Rsph1	radial spoke head 1 homolog [Source:RefSeq peptide;Acc:NP_001012176]	20	9.63346	9.64841	0	0	NA	NA	0	0	0.483354	1	0.839732	-0.019736	0.81055	0	1.84549
ENSRNOG00000001169	Slc37a1	glycerol-3-phosphate transporter [Source:RefSeq peptide;Acc:NP_001011944]	20	9.68966	9.7451	0	0	0.53795	1.04779	0	0	0.621986	1	1.07517	-0.0591049	0.472476	0	1.37414
ENSRNOG00000001170	Cox6a1	Cytochrome c oxidase subunit 6A1, mitochondrial [Source:UniProtKB/Swiss-Prot;Acc:P10818]	12	42.5301	42.5331	45.3	45.3	0.0667109	0.968686	0	0	0.99688	1	1.00042	0.112096	0.17203	0	7.97488
ENSRNOG00000001171	Coq5	2-methoxy-6-polyprenyl-1,4-benzoquinol methylase, mitochondrial [Source:UniProtKB/Swiss-Prot;Acc:Q4G064]	12	42.5851	42.602	45.3	45.3	0.467669	1.06463	0	0	0.889045	1	1.01968	-0.078832	0.337605	0	3.37293
ENSRNOG00000001172	Rnf10	RING finger protein 10 [Source:UniProtKB/Swiss-Prot;Acc:Q5XI59]	12	42.6099	42.6437	45.3	45.3	0.255375	1.02966	0	0	0.938187	1	1.01589	-0.206975	0.0110445	0	5.51343
ENSRNOG00000001173	Cabp1	Calcium-binding protein 1 [Source:UniProtKB/Swiss-Prot;Acc:O88751]	12	42.6949	42.7206	45.3	45.3	0.227298	1.1725	0	0	0.344172	1	1.13787	-0.216433	0.00780981	0	5.63753
ENSRNOG00000001174	Pde9a	high affinity cGMP-specific 3',5'-cyclic phosphodiesterase 9A [Source:RefSeq peptide;Acc:NP_612552]	20	9.8159	9.90158	0	0	NA	NA	0	0	0.643819	1	0.949919	0.103651	0.206862	0	2.83928
ENSRNOG00000001175	Unc119b	protein unc-119 homolog B [Source:RefSeq peptide;Acc:NP_001099404]	12	42.7504	42.7631	45.3	45.3	0.524969	1.02942	0	0	0.835416	1	1.07403	-0.00179741	0.982584	0	2.97726
ENSRNOG00000001177	Acads	Short-chain specific acyl-CoA dehydrogenase, mitochondrial [Source:UniProtKB/Swiss-Prot;Acc:P15651]	12	42.7653	42.7745	45.3	45.3	NA	NA	0	0	0.88547	1	1.00705	0.114695	0.162237	0	2.08191
ENSRNOG00000001178	Sppl3	Uncharacterized protein [Source:UniProtKB/TrEMBL;Acc:D3ZY49]	12	42.7888	42.8246	45.3	45.3	0.644408	0.971859	0	0	0.845963	1	0.973837	-0.112551	0.170284	0	4.4953
ENSRNOG00000001181	Wdr4	WD repeat domain 4 [Source:RefSeq peptide;Acc:NP_001129139]	20	9.92585	9.94205	0	0	NA	NA	0	0	0.677658	1	1.12592	0.0031397	0.969583	0	1.56142
ENSRNOG00000001182	Ndufv3	NADH dehydrogenase [Source:RefSeq peptide;Acc:NP_072129]	20	9.95111	9.96026	0	0	NA	NA	0	0	0.636274	1	1.09508	-0.024794	0.763285	0	3.43791
ENSRNOG00000001184	Pknox1	homeobox protein PKNOX1 [Source:RefSeq peptide;Acc:NP_001013092]	20	10.0195	10.0417	0	0	NA	NA	0	0	0.917592	1	1.07364	-0.209794	0.00997505	0	1.68582
ENSRNOG00000001185	RGD1311899	Uncharacterized protein C12orf43 homolog [Source:UniProtKB/Swiss-Prot;Acc:Q5I034]	12	42.9457	42.9513	45.3	45.3	NA	NA	0	0	0.688768	1	1.04127	-0.0619513	0.451377	0	6.30573
ENSRNOG00000001189	Sik1	Serine/threonine-protein kinase SIK1 [Source:UniProtKB/Swiss-Prot;Acc:Q9R1U5]	20	10.2802	10.2918	0	0	0.0854306	1.16975	0	0	0.1254	1	1.67759	-0.0362114	0.659987	0	2.2331
ENSRNOG00000001190	Git2	ARF GTPase-activating protein GIT2 [Source:RefSeq peptide;Acc:NP_001005553]	12	43.1177	43.1587	45.3	45.3	0.148193	1.0664	0	0	0.766476	1	1.04959	0.00404641	0.960805	0	3.62721
ENSRNOG00000001191	D3ZY42_RAT	trichoplein keratin filament-binding protein [Source:RefSeq peptide;Acc:NP_001178595]	12	43.1672	43.1816	45.3	45.3	NA	NA	0	0	0.293945	1	1.15807	-0.110231	0.179321	0	2.74211
ENSRNOG00000001192	Gltp	Glycolipid transfer protein [Source:UniProtKB/Swiss-Prot;Acc:B0BNM9]	12	43.1955	43.2157	45.3	45.3	0.02849	0.902602	0	0	0.793343	1	0.987631	-0.0586142	0.476166	0	3.57823
ENSRNOG00000001194	D3ZY39_RAT	ribosomal RNA processing 1 homolog B (S. cerevisiae) [Source:MGI Symbol;Acc:MGI:1919712]	20	10.4542	10.4776	0	0	0.182118	1.10094	0	0	0.880265	1	0.973522	0.0796214	0.332775	0	1.80841
ENSRNOG00000001197	Pdxk	NA	20	10.5417	10.5632	0	0	NA	NA	0	0	0.651176	1	1.13817	-0.00179208	0.982636	0	4.13018
ENSRNOG00000001198	RGD1565883	uncharacterized protein LOC498193 [Source:RefSeq peptide;Acc:NP_001102537]	12	43.2763	43.2953	45.3	45.3	NA	NA	0	0	0.573732	1	1.26595	-0.0459452	0.57664	0	1.93605
ENSRNOG00000001199	Pop5	ribonuclease P/MRP protein subunit POP5 [Source:RefSeq peptide;Acc:NP_001099222]	12	42.6449	42.6494	45.3	45.3	0.00993152	0.684662	0	0	0.857057	1	0.939041	0.203778	0.0123778	0	3.21003
ENSRNOG00000001201	Cstb	Cystatin-B [Source:UniProtKB/Swiss-Prot;Acc:P01041]	20	10.5767	10.5787	0	0	0.908651	1.00333	0	0	0.896435	1	0.989244	-0.0903454	0.271552	0	5.25815
ENSRNOG00000001203	Rrp1	ribosomal RNA processing protein 1 homolog A [Source:RefSeq peptide;Acc:NP_001012073]	20	10.5943	10.6069	0	0	0.528105	1.02424	0	0	0.868631	1	1.00689	0.068972	0.401658	0	3.9615
ENSRNOG00000001204	Ankrd13a	ankyrin repeat domain-containing protein 13A [Source:RefSeq peptide;Acc:NP_001012148]	12	43.0861	43.1159	45.3	45.3	NA	NA	0	0	0.802143	1	0.964768	0.0212365	0.796448	0	3.65204
ENSRNOG00000001205	Agpat3	1-acyl-sn-glycerol-3-phosphate acyltransferase gamma [Source:RefSeq peptide;Acc:NP_001099848]	20	10.72	10.7516	0	0	0.0172183	1.22582	0	0	0.518772	1	1.09124	-0.163184	0.0460137	0	5.23809
ENSRNOG00000001210	Pwp2	PWP2 periodic tryptophan protein homolog [Source:RefSeq peptide;Acc:NP_001162124]	20	10.8362	10.8497	0	0	NA	NA	0	0	0.605319	1	0.93415	-0.0724708	0.378146	0	2.36851
ENSRNOG00000001211	RGD1303003	ES1 protein homolog, mitochondrial [Source:UniProtKB/Swiss-Prot;Acc:P56571]	20	10.8516	10.8597	0	0	0.443745	0.973882	0	0	0.630727	1	1.12035	0.151392	0.0644108	0	4.38745
ENSRNOG00000001214	Pfkl	6-phosphofructokinase, liver type [Source:UniProtKB/Swiss-Prot;Acc:P30835]	20	11.0093	11.0325	0.0141571	0.049234	0.662134	1.04636	0	0	0.672898	1	1.13617	0.0852145	0.299821	0	4.42735
ENSRNOG00000001215	RGD1309594	uncharacterized protein LOC309681 [Source:RefSeq peptide;Acc:NP_001008352]	20	11.0341	11.0409	0.0515751	0.0619631	0.543154	1.0256	0	0	0.279844	1	1.21328	0.171492	0.0358749	0	2.96204
ENSRNOG00000001216	Trpm2	transient receptor potential cation channel subfamily M member 2 [Source:RefSeq peptide;Acc:NP_001011559]	20	11.0533	11.0997	0.080666	0.151035	NA	NA	0	0	0.0972823	1	0.796495	0.0779911	0.3428	0	1.92598
ENSRNOG00000001217	Lrrc3	Leucine-rich repeat-containing protein 3 [Source:UniProtKB/Swiss-Prot;Acc:P59035]	20	11.1071	11.1081	0.162248	0.163687	NA	NA	0	0	0.683736	1	1.2263	-0.000154674	0.998501	0	0.613131
ENSRNOG00000001222	Ube2g2	ubiquitin-conjugating enzyme E2 G2 [Source:RefSeq peptide;Acc:NP_001099850]	20	11.3686	11.3893	0.558207	0.589486	0.396562	0.891789	0	0	0.943046	1	1.06102	0.0378079	0.645989	0	3.62616
ENSRNOG00000001223	Pttg1ip	Pituitary tumor-transforming gene 1 protein-interacting protein [Source:UniProtKB/Swiss-Prot;Acc:Q6P767]	20	11.4147	11.4319	0.627941	0.654079	0.10663	1.05492	0	0	1	1	1.02547	0.078496	0.339675	0	4.4183
ENSRNOG00000001224	Itgb2	integrin beta 2 precursor [Source:RefSeq peptide;Acc:NP_001032869]	20	11.4465	11.485	0.676176	0.734442	0.248165	1.06997	0	0	0.344181	1	0.891875	-0.0505321	0.539147	0	1.2994
ENSRNOG00000001225	RGD1311257	uncharacterized protein LOC294333 [Source:RefSeq peptide;Acc:NP_001008308]	20	11.504	11.5369	0.763268	0.813047	0.69695	0.98024	0	0	1	1	1.06209	0.119893	0.143911	0	2.58488
ENSRNOG00000001227	Adarb1	double-stranded RNA-specific editase 1 isoform 1 [Source:RefSeq peptide;Acc:NP_037026]	20	11.6167	11.7473	0.933887	1.13162	0.211668	1.03532	0	0	0.492586	1	1.11881	-0.149269	0.0682885	0	5.03915
ENSRNOG00000001228	Pofut2	GDP-fucose protein O-fucosyltransferase 2 precursor [Source:RefSeq peptide;Acc:NP_001101091]	20	11.7635	11.7742	1.15619	1.17241	0.622528	0.988145	0	0	0.948741	1	0.993065	0.110238	0.179293	0	3.33937
ENSRNOG00000001229	F1LR02_RAT	collagen, type XVIII, alpha 1 precursor [Source:RefSeq peptide;Acc:NP_445941]	20	11.9208	11.9816	1.39438	1.48648	NA	NA	0	0	0.764136	1	0.967119	0.236361	0.00359147	0	1.36227
ENSRNOG00000001232	Slc19a1	folate transporter 1 [Source:RefSeq peptide;Acc:NP_058995]	20	11.9843	12.0019	1.49049	1.51711	NA	NA	0	0	0.818883	1	0.984745	0.0322468	0.695251	0	1.8356
ENSRNOG00000001235	Gna12	Guanine nucleotide-binding protein subunit alpha-12 [Source:UniProtKB/Swiss-Prot;Acc:Q63210]	12	14.2757	14.3548	8.04347	8.15162	0.351773	1.10565	0	0	0.587358	1	1.12966	0.0882511	0.282865	0	5.2435
ENSRNOG00000001236	RGD1565146	Uncharacterized protein [Source:UniProtKB/TrEMBL;Acc:D3ZSM9]	12	14.4002	14.4118	8.21364	8.22951	NA	NA	0	0	1	1	1.03172	-0.00807148	0.921909	0	2.17229
ENSRNOG00000001237	Cabin1	calcineurin-binding protein cabin-1 [Source:RefSeq peptide;Acc:NP_446027]	20	13.4448	13.5695	3.70213	3.89089	0.031072	1.12245	0	0	0.332326	1	1.16923	0.0169199	0.837176	0	2.95995
ENSRNOG00000001238	Rsrc2	Arginine/serine-rich coiled-coil protein 2 [Source:UniProtKB/Swiss-Prot;Acc:Q5PQR4]	12	33.9774	33.9973	34.9234	34.9469	0.229388	1.05885	0	0	0.38863	1	1.1316	-0.105413	0.199206	0	4.23567
ENSRNOG00000001239	Ddt	D-dopachrome decarboxylase [Source:UniProtKB/Swiss-Prot;Acc:P80254]	20	13.5918	13.5943	3.92471	3.92844	0.247727	1.08979	0	0	0.275212	1	1.13333	-0.0742487	0.366527	0	5.52855
ENSRNOG00000001241	Iqce		12	14.4142	14.4514	8.2327	8.28362	NA	NA	0	0	0.981196	1	1.02208	0.0129695	0.874834	0	2.35734
ENSRNOG00000001242	Gstt3	glutathione S-transferase, theta 3 [Source:RefSeq peptide;Acc:NP_001131115]	20	13.5959	13.6215	3.93099	3.96963	0.109464	1.1248	0	0	0.044418	1	1.38068	-0.202011	0.0131738	0	4.43368
ENSRNOG00000001243	D3ZUL8_RAT	zinc finger CCHC domain-containing protein 8 [Source:RefSeq peptide;Acc:NP_001099399]	12	34.0076	34.0299	34.9589	34.9851	NA	NA	0	0	0.554905	1	0.898014	-0.0518672	0.528464	0	2.81079
ENSRNOG00000001245	Pcbp3	poly(rC)-binding protein 3 [Source:RefSeq peptide;Acc:NP_001011945]	20	12.0892	12.2903	1.64932	1.95384	0.846067	0.990717	0	0	0.175623	1	0.799923	-0.123945	0.130751	0	3.84324
ENSRNOG00000001247	Clip1	restin [Source:RefSeq peptide;Acc:NP_113933]	12	34.0498	34.1555	35.0085	35.1327	0.737114	1.01378	0	0	0.961397	1	0.977562	0.0300707	0.714894	0	3.67173
ENSRNOG00000001249	Col6a1	Protein Col6a1 [Source:UniProtKB/TrEMBL;Acc:D3ZUL3]	20	12.3202	12.3377	1.99909	2.02565	NA	NA	0	0	0.618683	1	0.929194	0.241691	0.00288588	0	2.773
ENSRNOG00000001250	Lfng	Beta-1,3-N-acetylglucosaminyltransferase lunatic fringe [Source:UniProtKB/Swiss-Prot;Acc:Q924T4]	12	14.4977	14.5057	8.34686	8.35782	NA	NA	0	0	0.808442	1	1.03331	0.20335	0.0125668	0	3.53371
ENSRNOG00000001251	Grifin	grifin [Source:RefSeq peptide;Acc:NP_476535]	12	14.5474	14.5494	8.41476	8.41745	0.00188456	0.536377	1	0	0.351474	1	0.594308	-0.0785404	0.339401	0	2.62252
ENSRNOG00000001252	Chst12	carbohydrate sulfotransferase 12 [Source:RefSeq peptide;Acc:NP_001032864]	12	14.5778	14.579	8.4563	8.45793	NA	NA	0	0	0.656596	1	1.06626	0.031109	0.705498	0	2.97612
ENSRNOG00000001253	Eif3b	Eukaryotic translation initiation factor 3 subunit B [Source:UniProtKB/Swiss-Prot;Acc:Q4G061]	12	14.667	14.6921	8.5782	8.61258	0.682449	1.01503	0	0	0.851176	1	0.984623	-0.113714	0.165885	0	4.26066
ENSRNOG00000001254	Col6a2	collagen, type VI, alpha 2 precursor [Source:RefSeq peptide;Acc:NP_001094211]	20	12.4449	12.4645	2.18802	2.21769	NA	NA	0	0	0.971942	1	1.02856	0.0798543	0.331358	0	2.01603
ENSRNOG00000001255	Mlxip	Protein Mlxip [Source:UniProtKB/TrEMBL;Acc:F1M051]	12	34.2713	34.2857	35.2687	35.2857	NA	NA	0	0	0.802743	1	0.980655	-0.0260136	0.752011	0	2.66749
ENSRNOG00000001256	F1LXI6_RAT	Protein Atxn2 [Source:UniProtKB/TrEMBL;Acc:F1M049]	12	35.959	36.0002	37.2518	37.3003	0.445127	1.04862	0	0	0.429103	1	1.11311	-0.0890067	0.278748	0	4.28195
ENSRNOG00000001258	Snx8	sorting nexin-8 [Source:RefSeq peptide;Acc:NP_001099382]	12	14.7249	14.7735	8.65734	8.72372	NA	NA	0	0	0.756386	1	1.03177	0.0373208	0.650247	0	2.31786
ENSRNOG00000001259	F1M048_RAT	cut-like homeobox 2 [Source:MGI Symbol;Acc:MGI:107321]	12	35.8501	35.9104	37.1239	37.1947	0.0350999	1.25391	0	0	0.173161	1	1.22219	0.00707765	0.931499	0	3.30913
ENSRNOG00000001260	Nudt1	7,8-dihydro-8-oxoguanine triphosphatase [Source:UniProtKB/Swiss-Prot;Acc:P53369]	12	14.7757	14.7788	8.72681	8.73109	0.434786	0.960645	0	0	0.548335	1	1.34392	0.000686253	0.99335	0	0.882301
ENSRNOG00000001262	LOC499418	uncharacterized protein LOC499418 [Source:RefSeq peptide;Acc:NP_001019467]	20	12.489	12.4981	2.25471	2.26849	NA	NA	0	0	0.901833	1	1.03597	0.190053	0.0198344	0	0.86036
ENSRNOG00000001265	Mad1l1	mitotic spindle assembly checkpoint protein MAD1 [Source:RefSeq peptide;Acc:NP_001102857]	12	14.7939	15.1075	8.75166	9.18022	NA	NA	0	0	0.904463	1	1.02793	0.186261	0.0224807	0	2.00347
ENSRNOG00000001267	Lss	lanosterol synthase [Source:MGI Symbol;Acc:MGI:1336155]	20	12.5076	12.5346	2.2829	2.32388	NA	NA	0	0	0.888788	1	1.00161	-0.137427	0.09354	0	2.96421
ENSRNOG00000001269	PP1G_RAT	Serine/threonine-protein phosphatase PP1-gamma catalytic subunit [Source:UniProtKB/Swiss-Prot;Acc:P63088]	12	35.5802	35.5983	36.8067	36.828	0.675088	1.00845	0	0	0.763565	1	0.97919	-0.0861177	0.294709	0	6.26642
ENSRNOG00000001270	RGD1310788	hydrogen voltage-gated channel 1 [Source:MGI Symbol;Acc:MGI:1921346]	12	35.5378	35.5603	36.7569	36.7834	NA	NA	0	0	0.290677	1	0.874819	0.01908	0.816734	0	0.755153
ENSRNOG00000001271	Card6	caspase recruitment domain-containing protein 6 [Source:RefSeq peptide;Acc:NP_001099883]	2	54.2822	54.2936	37.3422	37.3555	NA	NA	0	0	0.50575	1	0.901375	-0.0408534	0.619632	0	0.801685
ENSRNOG00000001272	Mcm3ap	80 kDa MCM3-associated protein [Source:RefSeq peptide;Acc:NP_001099852]	20	12.5434	12.5808	2.33721	2.39378	0.598379	1.03327	0	0	0.912283	1	1.00007	0.0590729	0.472716	0	2.82804
ENSRNOG00000001273	LOC100361517	proteasome (prosome, macropain) assembly chaperone 3 [Source:MGI Symbol;Acc:MGI:1913756]	12	15.2872	15.2901	9.4259	9.42979	0.185549	0.933169	0	0	0.521978	1	0.886642	0.03816	0.642919	0	2.9987
ENSRNOG00000001274	Vps29	Vacuolar protein sorting-associated protein 29 [Source:UniProtKB/Swiss-Prot;Acc:B2RZ78]	12	35.4034	35.4124	36.5989	36.6096	NA	NA	0	0	0.832973	1	0.936003	-0.0630766	0.443183	0	5.78298
ENSRNOG00000001276	D3ZMY8_RAT	pericentrin (kendrin) [Source:MGI Symbol;Acc:MGI:102722]	20	12.6087	12.6944	2.43596	2.56574	NA	NA	0	0	0.716897	1	1.05481	0.0788694	0.337376	0	2.1098
ENSRNOG00000001277	Mafk	transcription factor MafK [Source:RefSeq peptide;Acc:NP_663706]	12	15.3124	15.3231	9.46031	9.47495	0.0374333	1.06784	0	0	0.851094	1	1.04024	0.134788	0.100069	0	2.34758
ENSRNOG00000001278	Gpn3	GPN-loop GTPase 3 [Source:RefSeq peptide;Acc:NP_973720]	12	35.384	35.3926	36.5762	36.5864	0.1127	0.945121	0	0	0.652581	1	1.09932	0.122569	0.135113	0	3.21481
ENSRNOG00000001283	Anapc7	anaphase-promoting complex subunit 7 [Source:RefSeq peptide;Acc:NP_001100612]	12	35.3276	35.3541	36.51	36.5411	0.0181469	0.807234	0	0	0.976067	1	0.977264	-0.0218997	0.790237	0	3.36785
ENSRNOG00000001285	Atp2a2	sarcoplasmic/endoplasmic reticulum calcium ATPase 2 isoform b [Source:RefSeq peptide;Acc:NP_001103609]	12	35.267	35.3162	36.4387	36.4966	0.0285344	0.964846	0	0	0.812544	1	0.946976	-0.0339838	0.679715	0	7.38976
ENSRNOG00000001287	Gper	G-protein coupled estrogen receptor 1 [Source:RefSeq peptide;Acc:NP_598257]	12	15.7187	15.7198	10.0156	10.0171	NA	NA	0	0	0.230787	1	0.785853	0.0431131	0.600382	0	0.803107
ENSRNOG00000001288	Gpr146	probable G-protein coupled receptor 146 [Source:RefSeq peptide;Acc:NP_001102532]	12	15.7548	15.7679	10.0649	10.0828	NA	NA	0	0	0.71661	1	1.11162	0.0637984	0.437972	0	2.19345
ENSRNOG00000001289	LOC498154	RIKEN cDNA 3110082I17 gene [Source:MGI Symbol;Acc:MGI:1920462]	12	15.6864	15.7898	9.97143	10.1127	0.303053	1.04309	0	0	0.651142	1	1.04765	0.0324406	0.693511	0	3.04974
ENSRNOG00000001290	Cox19	NA	12	15.8043	15.8121	10.1325	10.1433	0.205944	0.911356	0	0	0.329887	1	0.870215	-0.0172897	0.833669	0	3.09378
ENSRNOG00000001291	Adap1	centaurin, alpha 1 [Source:RefSeq peptide;Acc:NP_598251]	12	15.825	15.8776	10.1609	10.2328	0.655926	1.01622	0	0	0.844283	1	1.01924	-0.0580382	0.480519	0	5.32066
ENSRNOG00000001293	Cee	conserved edge expressed protein [Source:RefSeq peptide;Acc:NP_001156792]	12	15.8794	15.8955	10.2352	10.2571	NA	NA	0	0	0.786419	1	1.08572	0.0931598	0.25684	0	3.93801
ENSRNOG00000001294	Ift81	Intraflagellar transport protein 81 homolog [Source:UniProtKB/Swiss-Prot;Acc:P83829]	12	35.1417	35.2113	36.2914	36.3733	NA	NA	0	0	0.151509	1	0.774238	0.161024	0.0490102	0	3.04671
ENSRNOG00000001295	S100b	Protein S100-B [Source:UniProtKB/Swiss-Prot;Acc:P04631]	20	12.7914	12.8245	2.71275	2.76283	0.00263857	1.0793	1	0	0.907217	1	1.01775	0.0075719	0.926728	0	8.4744
ENSRNOG00000001296	P2rx7	P2X purinoceptor 7 [Source:UniProtKB/Swiss-Prot;Acc:Q64663]	12	35.0742	35.1172	36.2122	36.2627	NA	NA	0	0	0.0834224	1	0.795357	0.0661239	0.421423	0	2.07175
ENSRNOG00000001297	Prmt2	rno-mir-678 [Source:miRBase;Acc:MI0012619]	20	12.8004	12.817	2.72632	2.75147	0.53544	1.02641	0	0	0.799079	1	1.08379	0.105306	0.199663	0	3.77819
ENSRNOG00000001299	Unc84a	SUN domain-containing protein 1 [Source:RefSeq peptide;Acc:NP_001007148]	12	15.8991	15.932	10.2621	10.307	NA	NA	0	0	0.841524	1	1.0311	-0.0468075	0.5695	0	3.88769
ENSRNOG00000001300	P2rx4	P2X purinoceptor 4 [Source:UniProtKB/Swiss-Prot;Acc:P51577]	12	34.9439	34.9615	36.0591	36.0798	0.00347717	0.64665	0	0	0.000640578	0.284348	0.622993	-0.0746309	0.364058	0	2.9571
ENSRNOG00000001302	Adora2a	Adenosine receptor A2a [Source:UniProtKB/Swiss-Prot;Acc:P30543]	20	13.8157	13.8341	4.2638	4.29168	0.807966	0.988954	0	0	0.760308	1	1.48732	0.0307872	0.708405	0	3.22558
ENSRNOG00000001303	Cytsa	Cytospin-A [Source:UniProtKB/Swiss-Prot;Acc:Q2KN99]	20	13.8404	13.9452	4.30123	4.45984	0.994331	1.00133	0	0	0.837557	1	1.03178	-0.238297	0.00331896	0	2.9418
ENSRNOG00000001304	Bcr	Protein Bcr [Source:UniProtKB/TrEMBL;Acc:F1LXF1]	20	13.9728	14.0974	4.50163	4.69034	0.353396	1.04397	0	0	0.411722	1	1.10883	-0.174271	0.0329355	0	4.13729
ENSRNOG00000001309	Camkk2	calcium/calmodulin-dependent protein kinase kinase 2 [Source:RefSeq peptide;Acc:NP_112628]	12	34.9074	34.9385	36.0162	36.0527	0.13289	1.22946	0	0	0.566497	1	1.04464	0.0994996	0.22573	0	4.15107
ENSRNOG00000001311	Rab36	ras-related protein Rab-36 [Source:RefSeq peptide;Acc:NP_001103059]	20	14.1117	14.1273	4.71205	4.73559	4.23773372414076e-05	0.746672	1	1	0.501971	1	0.902629	0.0334326	0.68463	0	3.26854
ENSRNOG00000001312	Pdgfa	Platelet-derived growth factor subunit A [Source:UniProtKB/Swiss-Prot;Acc:P28576]	12	16.1555	16.1724	10.6268	10.6515	0.889461	0.999696	0	0	0.658005	1	0.975732	-0.0551154	0.502931	0	4.06492
ENSRNOG00000001313	Gnaz	Guanine nucleotide-binding protein G(z) subunit alpha [Source:UniProtKB/Swiss-Prot;Acc:P19627]	20	14.148	14.1741	4.76698	4.80655	0.529502	1.0524	0	0	0.597933	1	1.12614	-0.0829744	0.312751	0	4.1778
ENSRNOG00000001314	Fam20c	dentin matrix protein 4 [Source:RefSeq peptide;Acc:NP_001012238]	12	16.3404	16.3993	10.8964	10.9823	0.580881	1.02623	0	0	0.952066	1	1.03622	0.0186942	0.820377	0	3.60388
ENSRNOG00000001316	APC5_RAT	Anaphase-promoting complex subunit 5 [Source:UniProtKB/Swiss-Prot;Acc:A1L1K3]	12	34.8505	34.8847	35.9493	35.9896	0.123703	0.942935	0	0	0.203073	1	0.859549	-0.0778578	0.343628	0	5.33426
ENSRNOG00000001317	Zfp68	zinc finger protein 68 isoform 1 [Source:RefSeq peptide;Acc:NP_001100598]	12	16.5378	16.5494	11.1843	11.2012	0.493397	1.04698	0	0	0.583054	1	1.11875	-0.0177697	0.82912	0	3.01526
ENSRNOG00000001323	Zfp157	zinc finger protein 157 [Source:RefSeq peptide;Acc:NP_001163875]	12	16.7588	16.78	11.5066	11.5375	0.696631	1.02626	0	0	0.421615	1	1.1348	0.010452	0.898985	0	2.60841
ENSRNOG00000001324	Asmt	Acetylserotonin O-methyltransferase [Source:UniProtKB/Swiss-Prot;Acc:B3GSH5]	12	16.8119	16.8172	11.584	11.5918	NA	NA	0	0	0.971798	1	0.977402	0.057263	0.48641	0	0.816162
ENSRNOG00000001325	E9PSX4_RAT	interleukin-3 receptor subunit alpha precursor [Source:RefSeq peptide;Acc:NP_640353]	12	16.8257	16.83	11.6042	11.6105	NA	NA	0	0	0.957676	1	1.01153	0.157413	0.0543802	0	2.03437
ENSRNOG00000001329	Gjc3	Gap junction protein [Source:UniProtKB/TrEMBL;Acc:F1LPT0]	12	17.4609	17.4616	12.5304	12.5315	NA	NA	0	0	0.816529	1	1.10487	0.0116876	0.887119	0	3.2217
ENSRNOG00000001331	Rnf34	E3 ubiquitin-protein ligase RNF34 [Source:UniProtKB/Swiss-Prot;Acc:Q6AYH3]	12	34.8051	34.826	35.896	35.9206	0.106418	0.928934	0	0	0.599083	1	1.06873	0.0313881	0.702979	0	4.05087
ENSRNOG00000001335	Zkscan1	Zinc finger protein with KRAB and SCAN domains 1 [Source:UniProtKB/Swiss-Prot;Acc:Q4KLI1]	12	17.5304	17.5468	12.6318	12.6557	0.102316	0.90552	0	0	0.841857	1	1.00345	0.0510796	0.534753	0	3.04319
ENSRNOG00000001336	Orai1	calcium release-activated calcium channel protein 1 [Source:RefSeq peptide;Acc:NP_001014004]	12	34.6313	34.6721	35.6917	35.7397	0.00649607	0.780867	0	0	0.476724	1	0.774174	0.038352	0.641247	0	2.82673
ENSRNOG00000001337	F1LWJ1_RAT	SET domain containing 1B [Source:MGI Symbol;Acc:MGI:2652820]	12	34.5639	34.5866	35.6126	35.6392	NA	NA	0	0	0.658782	1	1.11272	0.0450207	0.584342	0	2.10767
ENSRNOG00000001338	Hpd	4-hydroxyphenylpyruvate dioxygenase [Source:UniProtKB/Swiss-Prot;Acc:P32755]	12	34.5483	34.5584	35.5943	35.6061	NA	NA	0	0	0.137941	1	0.596636	0.0618268	0.452288	0	0.643581
ENSRNOG00000001339	Psmd9	26S proteasome non-ATPase regulatory subunit 9 [Source:RefSeq peptide;Acc:NP_569114]	12	34.4723	34.5007	35.5049	35.5384	0.0182967	0.894502	0	0	0.863316	1	1.07569	-0.0101729	0.901669	0	5.18303
ENSRNOG00000001341	D3ZI20_RAT	zinc finger protein 113 [Source:MGI Symbol;Acc:MGI:1929116]	12	17.5886	17.5987	12.7167	12.7315	NA	NA	0	0	0.943417	1	0.996993	0.0262661	0.749684	0	1.43096
ENSRNOG00000001342	F1LY30_RAT	WD repeat domain 66 [Source:MGI Symbol;Acc:MGI:1918495]	12	34.4129	34.4799	35.4352	35.5139	NA	NA	0	0	0.240087	1	0.781222	-0.0436055	0.596222	0	1.31637
ENSRNOG00000001343	D3ZI21_RAT	B cell CLL/lymphoma 7A [Source:MGI Symbol;Acc:MGI:1924295]	12	34.3665	34.3936	35.3806	35.4125	NA	NA	0	0	0.780372	1	1.05865	0.0170906	0.835557	0	3.33115
ENSRNOG00000001344	ALDH2_RAT	aldehyde dehydrogenase, mitochondrial precursor [Source:RefSeq peptide;Acc:NP_115792]	12	36.0818	36.1164	37.4091	37.4553	0.581767	0.972683	0	0	0.922496	1	1.04346	0.169089	0.0385932	0	3.81219
ENSRNOG00000001345	Mapkapk5	MAP kinase-activated protein kinase 5 isoform 2 [Source:RefSeq peptide;Acc:NP_001020932]	12	36.1287	36.1475	37.4716	37.4967	0.291936	1.06864	0	0	0.653206	1	0.953753	-0.164052	0.044854	0	3.88686
ENSRNOG00000001346	Cops6	COP9 signalosome complex subunit 6 [Source:RefSeq peptide;Acc:NP_001100599]	12	17.604	17.6069	12.7392	12.7433	0.541213	1.04496	0	0	0.400877	1	1.10721	-0.095023	0.247406	0	5.24969
ENSRNOG00000001347	D3ZI19_RAT		12	36.1521	36.1551	37.5028	37.5068	NA	NA	0	0	1	1	1.03755	0.143313	0.0801908	0	1.63431
ENSRNOG00000001348	Erp29	Endoplasmic reticulum resident protein 29 [Source:UniProtKB/Swiss-Prot;Acc:P52555]	12	36.2251	36.2314	37.6001	37.6085	0.140116	1.05109	0	0	0.710708	1	1.05572	0.11774	0.1513	0	5.03842
ENSRNOG00000001349	Mcm7	DNA replication licensing factor MCM7 [Source:RefSeq peptide;Acc:NP_001004203]	12	17.6073	17.6151	12.7439	12.7554	0.0185454	1.21263	0	0	0.24702	1	1.3011	-0.0534549	0.515903	0	1.86816
ENSRNOG00000001350	Naa25	N-alpha-acetyltransferase 25, NatB auxiliary subunit [Source:UniProtKB/Swiss-Prot;Acc:Q6QI44]	12	36.2335	36.2867	37.6113	37.6822	NA	NA	0	0	0.78847	1	0.959596	0.016575	0.840451	0	2.87974
ENSRNOG00000001351	Trafd1	TRAF-type zinc finger domain-containing protein 1 [Source:UniProtKB/Swiss-Prot;Acc:Q99MM4]	12	36.3018	36.3157	37.7024	37.721	0.390368	0.961791	0	0	0.624424	1	0.978553	0.223635	0.00594178	0	3.80431
ENSRNOG00000001352	RGD1309762	Protein RGD1309762 [Source:UniProtKB/TrEMBL;Acc:F1LZX5]	12	36.357	36.3828	37.7761	37.8105	NA	NA	0	0	0.411733	1	1.10704	0.0145962	0.859288	0	4.38172
ENSRNOG00000001353	Ap4m1	AP-4 complex subunit mu-1 [Source:UniProtKB/Swiss-Prot;Acc:Q2PWT8]	12	17.6148	17.621	12.755	12.7639	NA	NA	0	0	0.313579	1	0.872654	0.028051	0.733294	0	2.57803
ENSRNOG00000001355	TAF6_RAT	Transcription initiation factor TFIID subunit 6 [Source:UniProtKB/Swiss-Prot;Acc:Q63801]	12	17.621	17.6293	12.764	12.776	0.152249	0.931273	0	0	0.889981	1	0.998514	-0.000744923	0.992782	0	3.44797
ENSRNOG00000001357	Mblac1	Metallo-beta-lactamase domain-containing protein 1 [Source:UniProtKB/Swiss-Prot;Acc:Q6AYD1]	12	17.6365	17.6377	12.7865	12.7884	0.198994	1.12348	0	0	0.297787	1	1.21041	0.0706539	0.390249	0	1.49375
ENSRNOG00000001368	Rph3a	rabphilin-3A [Source:RefSeq peptide;Acc:NP_598202]	12	36.7056	36.7533	38.2408	38.3044	0.703837	0.980578	0	0	0.447396	1	1.07688	-0.174383	0.0328214	0	5.82483
ENSRNOG00000001369	Oas1a	2'-5'-oligoadenylate synthase 1A [Source:RefSeq peptide;Acc:NP_620268]	12	36.8059	36.8167	38.3745	38.389	NA	NA	0	0	0.41339	1	0.80246	-0.0321472	0.696145	0	0.618771
ENSRNOG00000001372	Oas1b	Inactive 2'-5'-oligoadenylate synthase 1B [Source:UniProtKB/Swiss-Prot;Acc:Q5BKD0]	12	36.8584	36.8696	38.4445	38.4594	NA	NA	0	0	0.243108	1	0.824392	0.0429033	0.602158	0	0.887883
ENSRNOG00000001374	D3ZRQ4_RAT	rasGAP-activating-like protein 1 [Source:RefSeq peptide;Acc:NP_001101805]	12	37.0485	37.0801	38.698	38.7402	NA	NA	0	0	0.792213	1	1.04716	0.151975	0.0633776	0	2.98098
ENSRNOG00000001375	Gal3st4	galactose-3-O-sulfotransferase 4 [Source:RefSeq peptide;Acc:NP_001102534]	12	17.8486	17.8573	13.0958	13.1086	NA	NA	0	0	0.368311	1	1.20069	-0.103141	0.209118	0	0.960979
ENSRNOG00000001376	LOC100362962	methyltransferase-like protein 7A [Source:RefSeq peptide;Acc:NP_001032432]	7	139.062	139.063	105.145	105.145	NA	NA	0	0	0.28944	1	1.19397	-0.02393	0.771303	0	4.03268
ENSRNOG00000001377	Ddx54	ATP-dependent RNA helicase DDX54 [Source:RefSeq peptide;Acc:NP_001178477]	12	37.1034	37.1175	38.7713	38.79	0.241305	0.843481	0	0	0.850383	1	0.979193	-0.070453	0.391602	0	2.77091
ENSRNOG00000001378	IQCD_RAT	IQ motif containing D [Source:MGI Symbol;Acc:MGI:1922982]	12	37.1234	37.1346	38.7979	38.8128	NA	NA	0	0	0.923341	1	1.02981	0.0904877	0.270795	0	1.27488
ENSRNOG00000001379	Cyp3a9	cytochrome P450, family 3, subfamily a, polypeptide 62 [Source:RefSeq peptide;Acc:NP_001019403]	12	17.1644	17.2046	12.0981	12.1567	NA	NA	0	0	0.844055	1	1.17004	-0.113022	0.168491	0	1.17836
ENSRNOG00000001380	Tpcn1	two pore calcium channel protein 1 [Source:RefSeq peptide;Acc:NP_647548]	12	37.2114	37.2277	38.9152	38.9369	0.194541	1.05767	0	0	0.650857	1	0.949087	0.0342664	0.677199	0	3.35072
ENSRNOG00000001383	Slc24a6	Sodium/potassium/calcium exchanger 6 [Source:UniProtKB/Swiss-Prot;Acc:Q6AXS0]	12	37.2278	37.2507	38.9371	38.9676	NA	NA	0	0	0.310234	1	0.884852	0.142405	0.0821448	0	1.25827
ENSRNOG00000001385	Plbd2	Putative phospholipase B-like 2 [Source:UniProtKB/Swiss-Prot;Acc:Q4QQW8]	12	37.2607	37.2798	38.9809	39.0065	0.550098	1.03065	0	0	0.83185	1	0.981309	-0.173455	0.0337767	0	4.19673
ENSRNOG00000001387	Mepce	7SK snRNA methylphosphate capping enzyme [Source:RefSeq peptide;Acc:NP_001094148]	12	19.8489	19.853	16.013	16.019	0.276052	1.0977	0	0	1	1	1.06168	-0.240199	0.00306951	0	3.13378
ENSRNOG00000001388	Sds	L-serine dehydratase/L-threonine deaminase [Source:UniProtKB/Swiss-Prot;Acc:P09367]	12	37.2811	37.2861	39.0081	39.0148	NA	NA	0	0	0.108475	1	1.58291	-0.0590551	0.472849	0	0.707043
ENSRNOG00000001391	D3ZHV7_RAT	serine dehydratase-like [Source:MGI Symbol;Acc:MGI:2182607]	12	37.2973	37.3078	39.0298	39.0438	NA	NA	0	0	0.771636	1	1.09802	0.113676	0.166024	0	1.54561
ENSRNOG00000001396	Mospd3	motile sperm domain-containing protein 3 [Source:RefSeq peptide;Acc:NP_001020800]	12	19.6631	19.6669	15.7421	15.7476	0.406169	0.95977	0	0	0.647275	1	1.13256	-0.179301	0.0281329	0	3.53915
ENSRNOG00000001397	D3ZUN0_RAT	Uncharacterized protein [Source:UniProtKB/TrEMBL;Acc:D3ZHU8]	12	37.6192	37.7045	39.4589	39.5726	NA	NA	0	0	0.72998	1	0.938669	-0.171378	0.0359998	0	1.46326
ENSRNOG00000001402	Lrch4	leucine-rich repeat and calponin homology domain-containing protein 4 [Source:RefSeq peptide;Acc:NP_001121023]	12	19.6944	19.7054	15.7877	15.8037	NA	NA	0	0	0.635847	1	0.971023	-0.0640011	0.436515	0	2.16431
ENSRNOG00000001404	Agfg2	arf-GAP domain and FG repeats-containing protein 2 [Source:RefSeq peptide;Acc:NP_001100601]	12	19.716	19.7522	15.8192	15.8719	NA	NA	0	0	0.531981	1	1.13257	0.0337509	0.681791	0	3.19429
ENSRNOG00000001408	Actl6b	Actin-like protein 6B [Source:UniProtKB/Swiss-Prot;Acc:P86173]	12	19.6217	19.6382	15.6817	15.7057	0.133774	1.11428	0	0	0.892422	1	1.01505	-0.0595494	0.469146	0	4.4393
ENSRNOG00000001409	Gnb2	Guanine nucleotide-binding protein G(I)/G(S)/G(T) subunit beta-2 [Source:UniProtKB/Swiss-Prot;Acc:P54313]	12	19.5973	19.6023	15.6461	15.6534	0.254572	1.04257	0	0	0.766852	1	1.00595	0.0426508	0.604298	0	5.53878
ENSRNOG00000001410	Gigyf1	PERQ amino acid-rich with GYF domain-containing protein 1 [Source:RefSeq peptide;Acc:NP_001100603]	12	19.5863	19.5952	15.63	15.6431	0.876799	1.01833	0	0	0.723719	1	1.04908	0.171323	0.0360605	0	2.98918
ENSRNOG00000001414	Serpine1	plasminogen activator inhibitor 1 precursor [Source:RefSeq peptide;Acc:NP_036752]	12	20.932	20.9424	17.5925	17.6076	NA	NA	0	0	0.767239	1	0.853701	0.17465	0.0325511	0	0.591265
ENSRNOG00000001415	Ap1s1	ubiquitin-conjugating enzyme E2 W [Source:RefSeq peptide;Acc:NP_001101801]	12	20.9079	20.9183	17.5573	17.5725	0.990087	0.996861	0	0	0.948957	1	1.02857	0.0623566	0.448416	0	5.33305
ENSRNOG00000001416	Vgf	neurosecretory protein VGF precursor [Source:RefSeq peptide;Acc:NP_112259]	12	20.9033	20.9063	17.5507	17.5551	0.00425377	1.2573	0	0	0.325634	1	1.28785	-0.162902	0.046397	0	5.37376
ENSRNOG00000001417	Plod3	Procollagen-lysine,2-oxoglutarate 5-dioxygenase 3 [Source:UniProtKB/Swiss-Prot;Acc:Q5U367]	12	20.8565	20.8671	17.4824	17.4978	0.905982	1.00541	0	0	0.684822	1	1.08589	-0.0256261	0.755588	0	2.80405
ENSRNOG00000001418	LOC100360077	zinc finger, HIT domain containing 1 [Source:RefSeq peptide;Acc:NP_001258279]	12	20.8506	20.8566	17.4738	17.4826	0.92928	1.00108	0	0	0.380287	1	1.12028	-0.0510832	0.534724	0	4.32653
ENSRNOG00000001420	Fis1	Mitochondrial fission 1 protein [Source:UniProtKB/Swiss-Prot;Acc:P84817]	12	20.8068	20.8218	17.41	17.4317	0.621898	1.02578	0	0	0.556255	1	1.08759	0.018984	0.81764	0	6.2189
ENSRNOG00000001424	Cux1	Homeobox protein cut-like 1 [Source:UniProtKB/Swiss-Prot;Acc:P53565]	12	21.3971	21.5407	18.2707	18.4802	0.702674	0.971485	0	0	0.980019	1	1.01137	0.0400054	0.626925	0	4.04639
ENSRNOG00000001425	Sh2b2	SH2B adapter protein 2 [Source:UniProtKB/Swiss-Prot;Acc:Q9Z200]	12	21.5444	21.5722	18.4856	18.5262	0.615046	1.03643	0	0	0.926805	1	0.995371	0.0555332	0.499694	0	1.00595
ENSRNOG00000001426	Prkrip1	Prkr interacting protein 1 (IL11 inducible) [Source:RefSeq peptide;Acc:NP_001092263]	12	21.5862	21.6045	18.5465	18.5732	0.730365	0.971781	0	0	0.186827	1	1.22972	-0.0775964	0.345256	0	2.90277
ENSRNOG00000001427	Orai2	ORAI calcium release-activated calcium modulator 2 [Source:RefSeq peptide;Acc:NP_001163874]	12	21.6157	21.6334	18.5895	18.6154	NA	NA	0	0	0.492686	1	1.21838	0.0916148	0.264847	0	3.21955
ENSRNOG00000001428	Alkbh4	alkylated DNA repair protein alkB homolog 4 [Source:RefSeq peptide;Acc:NP_001099390]	12	21.6394	21.6453	18.6241	18.6328	NA	NA	0	0	0.85727	1	1.03828	0.208726	0.0103691	0	1.33713
ENSRNOG00000001429	F1MAE0_RAT	leucine-rich repeats and WD repeat domain containing 1 [Source:MGI Symbol;Acc:MGI:1918985]	12	21.6455	21.6584	18.633	18.6519	0.62744	0.954932	0	0	0.875129	1	1.05295	-0.0448518	0.585754	0	1.79431
ENSRNOG00000001430	Polr2j	polymerase (RNA) II (DNA directed) polypeptide J [Source:RefSeq peptide;Acc:NP_001099391]	12	21.6584	21.664	18.6518	18.6599	0.410424	0.944381	0	0	0.977601	1	1.00866	-0.108376	0.186794	0	3.7229
ENSRNOG00000001431	D3ZQH9_RAT	RAS p21 protein activator 4 [Source:MGI Symbol;Acc:MGI:1858600]	12	21.6685	21.6955	18.6665	18.706	NA	NA	0	0	0.53528	1	0.941364	0.109788	0.181085	0	0.790153
ENSRNOG00000001432	Dtx2	protein deltex-2 [Source:RefSeq peptide;Acc:NP_001100627]	12	21.7585	21.7981	18.7978	18.8555	NA	NA	0	0	0.678608	1	1.11708	-0.0613788	0.455578	0	1.49074
ENSRNOG00000001435	Srcrb4d	Protein Srcrb4d [Source:UniProtKB/TrEMBL;Acc:D3ZQH3]	12	21.8232	21.8335	18.8922	18.9072	NA	NA	0	0	0.861103	1	1.06709	0.00443398	0.957054	0	0.697104
ENSRNOG00000001436	Ywhag	14-3-3 protein gamma 14-3-3 protein gamma, N-terminally processed [Source:UniProtKB/Swiss-Prot;Acc:P61983]	12	21.8598	21.888	18.9455	18.9867	0.951043	0.998424	0	0	0.625047	1	1.03433	-0.284025	0.000427803	0	7.92512
ENSRNOG00000001439	LOC685890		12	21.9279	22.0057	19.0448	19.1583	NA	NA	0	0	0.390377	1	1.24072	0.00900307	0.912929	0	2.58487
ENSRNOG00000001440	Mdh2	Malate dehydrogenase, mitochondrial [Source:UniProtKB/Swiss-Prot;Acc:P04636]	12	22.0213	22.0343	19.1811	19.2	0.00135049	0.934418	1	0	0.656028	1	0.968061	-0.100726	0.220032	0	6.50619
ENSRNOG00000001441	Tmem120a	Transmembrane protein 120A [Source:UniProtKB/Swiss-Prot;Acc:Q5HZE2]	12	22.0698	22.0785	19.2518	19.2644	NA	NA	0	0	0.964162	1	1.002	-0.0345313	0.674845	0	2.86043
ENSRNOG00000001442	Por	NADPH--cytochrome P450 reductase [Source:UniProtKB/Swiss-Prot;Acc:P00388]	12	22.0786	22.1543	19.2647	19.3751	0.542626	0.976961	0	0	0.664029	1	1.10272	-0.131807	0.107875	0	4.45706
ENSRNOG00000001443	Rhbdd2	rhomboid domain-containing protein 2 [Source:RefSeq peptide;Acc:NP_001178756]	12	22.1986	22.2085	19.4396	19.454	NA	NA	0	0	0.809301	1	1.07208	-0.0780604	0.34237	0	4.56159
ENSRNOG00000001448	Hip1	huntingtin-interacting protein 1 [Source:RefSeq peptide;Acc:NP_001093945]	12	22.2879	22.4222	19.5698	19.7657	0.89978	1.01167	0	0	0.741831	1	1.07313	0.0742451	0.36655	0	3.08379
ENSRNOG00000001449	Pom121	nuclear envelope pore membrane protein POM 121 [Source:RefSeq peptide;Acc:NP_446074]	12	22.4314	22.4487	19.7791	19.8044	0.769032	1.01818	0	0	0.439398	1	1.13623	-0.142008	0.0830095	0	3.67427
ENSRNOG00000001450	Nsun5	NOP2/Sun domain family, member 5 [Source:RefSeq peptide;Acc:NP_001178522]	12	22.4487	22.4537	19.8044	19.8116	0.0999887	0.834801	0	0	0.822774	1	1.06813	0.0323375	0.694437	0	2.41817
ENSRNOG00000001452	Fzd9	frizzled-9 precursor [Source:RefSeq peptide;Acc:NP_695217]	12	22.5815	22.5838	19.998	20.0014	NA	NA	0	0	0.666883	1	1.02983	0.102019	0.21414	0	2.2236
ENSRNOG00000001453	Baz1b	tyrosine-protein kinase BAZ1B [Source:RefSeq peptide;Acc:NP_001178845]	12	22.5881	22.6444	20.0076	20.0897	NA	NA	0	0	0.774517	1	1.00441	-0.102629	0.211399	0	4.38311
ENSRNOG00000001454	Eif4h	Eukaryotic translation initiation factor 4H [Source:UniProtKB/Swiss-Prot;Acc:Q5XI72]	12	23.1483	23.165	20.8247	20.8489	0.072414	0.947448	0	0	0.789501	1	0.979562	0.124031	0.130484	0	6.40403
ENSRNOG00000001455	Kif13a	kinesin-like protein KIF13A [Source:RefSeq peptide;Acc:NP_001100932]	17	23.8191	24.008	3.03387	3.23713	0.0107353	1.10823	0	0	0.861874	1	1.08317	0.0722415	0.379661	0	2.45959
ENSRNOG00000001456	Nup153	nuclear pore complex protein Nup153 [Source:RefSeq peptide;Acc:NP_001093940]	17	24.0322	24.0842	3.26321	3.3192	0.174338	1.12793	0	0	0.744676	1	1.0708	-0.113831	0.165445	0	3.19687
ENSRNOG00000001457	Rfc2	Replication factor C subunit 2 [Source:UniProtKB/Swiss-Prot;Acc:Q641W4]	12	23.1856	23.1987	20.8789	20.898	0.0380224	0.857148	0	0	0.603012	1	0.907134	-0.119741	0.144426	0	2.0261
ENSRNOG00000001460	Vps37c	vacuolar protein sorting-associated protein 37C [Source:RefSeq peptide;Acc:NP_001100933]	1	213.185	213.21	132.38	132.397	0.567502	1.03199	0	0	0.959006	1	1.00072	-0.153961	0.0599605	0	2.58235
ENSRNOG00000001465	Ids	iduronate 2-sulfatase [Source:MGI Symbol;Acc:MGI:96417]	X	156.641	156.658	NA	NA	NA	NA	0	0	0.882187	1	0.989776	-0.0772711	0.347288	0	6.04329
ENSRNOG00000001469	Eln	Elastin [Source:UniProtKB/Swiss-Prot;Acc:Q99372]	12	23.0337	23.0761	20.6574	20.7193	NA	NA	0	0	0.632601	1	0.908339	0.169862	0.0377003	0	1.57059
ENSRNOG00000001470	Limk1	LIM domain kinase 1 [Source:RefSeq peptide;Acc:NP_113915]	12	23.0918	23.1257	20.7422	20.7917	0.30772	1.04988	0	0	0.527738	1	1.10327	-0.147432	0.0717946	0	4.38166
ENSRNOG00000001474	Wbscr28	Protein Wbscr28 [Source:UniProtKB/TrEMBL;Acc:D3ZKV0]	12	22.8586	22.8632	20.4022	20.4088	0.0515799	0.876744	0	0	0.0470453	1	0.651749	-0.00124806	0.987906	0	2.43101
ENSRNOG00000001475	Wbscr27	NA	12	22.821	22.8311	20.3473	20.362	NA	NA	0	0	0.622512	1	1.08079	0.0638749	0.437422	0	1.2571
ENSRNOG00000001477		NA	12	22.7996	22.8001	20.3161	20.3168	NA	NA	0	0	0.409091	1	1.14094	0.000318237	0.996916	0	2.59335
ENSRNOG00000001478	F1M710_RAT	general transcription factor II-I repeat domain-containing protein 1 [Source:RefSeq peptide;Acc:NP_001001504]	12	23.3194	23.4261	21.0741	21.2297	0.0421953	1.07555	0	0	1	1	1.0697	0.0580417	0.480492	0	2.14142
ENSRNOG00000001479	Gtf2i	General transcription factor II-I [Source:UniProtKB/Swiss-Prot;Acc:Q5U2Y1]	12	23.47	23.5456	21.2938	21.404	0.605727	0.98708	0	0	0.843129	1	1.02765	-0.0673826	0.412619	0	5.34056
ENSRNOG00000001480	F1M707_RAT	neutrophil cytosol factor 1 [Source:RefSeq peptide;Acc:NP_446186]	12	23.5781	23.5873	21.4514	21.4648	NA	NA	0	0	0.305227	1	0.868812	0.124135	0.130157	0	1.18401
ENSRNOG00000001482	Gtf2ird2	GTF2I repeat domain containing 2 [Source:MGI Symbol;Acc:MGI:2149780]	12	23.6505	23.682	21.557	21.6028	NA	NA	0	0	0.822595	1	0.968064	-0.0519135	0.528097	0	2.01351
ENSRNOG00000001483	Wbscr16	Williams-Beuren syndrome chromosome region 16 homolog [Source:RefSeq peptide;Acc:NP_001101802]	12	23.6977	23.7279	21.6258	21.6699	NA	NA	0	0	0.515688	1	1.12984	0.0136255	0.868559	0	2.11691
ENSRNOG00000001484	Gatsl2	GATS protein-like 2 [Source:RefSeq peptide;Acc:NP_001094031]	12	23.7372	23.7738	21.6834	21.7368	NA	NA	0	0	0.431065	1	1.14113	-0.0537535	0.513557	0	4.16476
ENSRNOG00000001487	Fam120b	constitutive coactivator of peroxisome proliferator-activated receptor gamma [Source:RefSeq peptide;Acc:NP_001100936]	1	54.2671	54.3114	47.7137	47.744	NA	NA	0	0	0.665996	1	1.0495	-0.00229344	0.977779	0	4.27187
ENSRNOG00000001488	Psmb1	proteasome subunit beta type-1 precursor [Source:RefSeq peptide;Acc:NP_446042]	1	54.3698	54.3888	47.7839	47.797	0.949618	1.00265	0	0	0.801767	1	0.971302	-0.14555	0.0755392	0	6.15057
ENSRNOG00000001489	Tbp	TATA-box-binding protein [Source:RefSeq peptide;Acc:NP_001004198]	1	54.3908	54.4076	47.7983	47.8098	0.783914	0.9886	0	0	0.582473	1	1.09879	0.189027	0.0205222	0	2.49864
ENSRNOG00000001490	Pdcd2	Programmed cell death protein 2 [Source:UniProtKB/Swiss-Prot;Acc:P47816]	1	54.4121	54.4176	47.8129	47.8166	0.319603	0.954773	0	0	0.461963	1	1.07841	0.232869	0.0041343	0	2.49126
ENSRNOG00000001492	NAC2_RAT	sodium/calcium exchanger 2 precursor [Source:RefSeq peptide;Acc:NP_511174]	1	76.4739	76.4984	53.5694	53.5747	0.996448	1.00013	0	0	0.651676	1	1.14061	0.0698023	0.396001	0	5.54158
ENSRNOG00000001493	B2RYG4_RAT	kaptin [Source:RefSeq peptide;Acc:NP_001100927]	1	76.4601	76.4678	53.5664	53.568	0.00404015	0.792646	0	0	0.703441	1	0.960274	0.126688	0.12238	0	3.23718
ENSRNOG00000001494	Napa	Alpha-soluble NSF attachment protein [Source:UniProtKB/Swiss-Prot;Acc:P54921]	1	76.4386	76.4572	53.5617	53.5657	0.72812	0.991864	0	0	0.779625	1	1.02578	-0.201527	0.0133993	0	6.38576
ENSRNOG00000001499	Mia	Melanoma-derived growth regulatory protein [Source:UniProtKB/Swiss-Prot;Acc:Q62946]	1	82.2552	82.2571	55.6021	55.6028	NA	NA	0	0	0.666177	1	1.21314	0.021217	0.796632	0	0.817406
ENSRNOG00000001500	Rab4b	Ras-related protein Rab-4B [Source:UniProtKB/Swiss-Prot;Acc:P51146]	1	82.2429	82.2544	55.5972	55.6018	0.840887	1.01561	0	0	0.466228	1	1.13412	0.159998	0.050489	0	4.294
ENSRNOG00000001501	Snrpa	U1 small nuclear ribonucleoprotein A [Source:RefSeq peptide;Acc:NP_001008304]	1	82.2657	82.2743	55.6063	55.6097	NA	NA	0	0	0.601173	1	1.08669	-0.162569	0.0468511	0	2.58202
ENSRNOG00000001503	Capns1	NA	1	85.5196	85.5259	56.9078	56.9104	NA	NA	0	0	0.219224	1	1.16869	-0.00644829	0.937577	0	5.52865
ENSRNOG00000001506	Tmem35	Transmembrane protein 35 [Source:UniProtKB/Swiss-Prot;Acc:Q6JAM9]	X	121.774	121.784	NA	NA	0.628662	1.02723	0	0	0.712485	1	0.960165	-0.176858	0.0303851	0	5.20601
ENSRNOG00000001514	Cdca7	Cell division cycle-associated protein 7 [Source:UniProtKB/Swiss-Prot;Acc:Q4KM91]	3	54.9485	54.9591	46.1793	46.1873	NA	NA	0	0	0.199742	1	0.801026	-0.0719962	0.381286	0	0.700262
ENSRNOG00000001515	Zak	RIKEN cDNA B230120H23 gene [Source:MGI Symbol;Acc:MGI:2443258]	3	54.7551	54.9144	46.0334	46.1536	NA	NA	0	0	0.923513	1	1.01311	0.0314396	0.702514	0	2.64606
ENSRNOG00000001516	Rapgef4	CAMPS [Source:UniProtKB/TrEMBL;Acc:D3KR63]	3	54.6323	54.7171	45.9408	46.0048	0.298245	1.09835	0	0	0.823176	1	0.939284	-0.0563617	0.493308	0	6.13452
ENSRNOG00000001517	Pdk1	pyruvate dehydrogenase kinase, isozyme 1 precursor [Source:RefSeq peptide;Acc:NP_446278]	3	54.2921	54.3192	45.684	45.7045	0.0867044	1.13199	0	0	0.405949	1	1.09511	-0.174616	0.0325853	0	3.74312
ENSRNOG00000001518	Itga6	integrin alpha-6 precursor [Source:RefSeq peptide;Acc:NP_446177]	3	54.2033	54.2726	45.617	45.6693	0.0439527	0.881502	0	0	0.691499	1	1.04445	-0.188647	0.0207825	0	3.03998
ENSRNOG00000001519	Dlx2	Homeobox protein DLX-2 [Source:UniProtKB/Swiss-Prot;Acc:Q64204]	3	53.8522	53.8541	45.3521	45.3535	NA	NA	0	0	0.969029	1	1.02988	-0.0371181	0.652022	0	1.39046
ENSRNOG00000001520	Dlx1	homeobox protein DLX-1 [Source:RefSeq peptide;Acc:NP_001094001]	3	53.8371	53.8416	45.3407	45.3441	0.526877	1.06229	0	0	0.878335	1	0.995567	-0.00724655	0.929868	0	2.65457
ENSRNOG00000001522	Map1d	methionine aminopeptidase 1D, mitochondrial [Source:RefSeq peptide;Acc:NP_001101282]	3	53.7588	53.8328	45.2816	45.3375	NA	NA	0	0	0.828626	1	1.05119	-0.0134886	0.869868	0	1.47657
ENSRNOG00000001524	Hat1	Histone acetyltransferase type B catalytic subunit [Source:UniProtKB/Swiss-Prot;Acc:Q5M939]	3	53.6967	53.7443	45.2348	45.2707	0.128239	0.928108	0	0	0.644657	1	0.998977	-0.104821	0.201755	0	3.37444
ENSRNOG00000001525	Igsf11	Immunoglobulin superfamily member 11 [Source:UniProtKB/Swiss-Prot;Acc:Q5U2P2]	11	63.5016	63.6404	43.8377	43.9538	0.27535	1.05512	0	0	0.887906	1	0.993452	0.0347127	0.673235	0	3.98794
ENSRNOG00000001528	Gap43	Neuromodulin [Source:UniProtKB/Swiss-Prot;Acc:P07936]	11	59.9891	60.084	40.9	40.9793	0.721717	0.987492	0	0	0.557492	1	1.07454	0.00535847	0.948111	0	6.97721
ENSRNOG00000001531	Chac2	Cation transport regulator-like protein 2 [Source:UniProtKB/Swiss-Prot;Acc:Q641Z5]	14	112.116	112.123	74	74	NA	NA	0	0	1	1	0.927833	0.0280368	0.733424	0	2.49724
ENSRNOG00000001544	Cyyr1	Cysteine and tyrosine-rich protein 1 [Source:UniProtKB/Swiss-Prot;Acc:Q5PQS5]	11	25.0417	25.1573	14.2359	14.3224	NA	NA	0	0	0.830655	1	0.854867	-0.0965413	0.239899	0	1.78098
ENSRNOG00000001547	Agps	alkyldihydroxyacetonephosphate synthase, peroxisomal [Source:RefSeq peptide;Acc:NP_445802]	3	58.5287	58.5477	48.8807	48.8951	NA	NA	0	0	0.416598	1	1.20936	0.0495045	0.54744	0	1.91881
ENSRNOG00000001548	Nfe2l2	Nuclear factor erythroid 2-related factor 2 [Source:UniProtKB/Swiss-Prot;Acc:O54968]	3	58.3667	58.3941	48.7585	48.7792	0.45032	1.06844	0	0	0.906848	1	0.948289	-0.0393476	0.632607	0	2.80315
ENSRNOG00000001549	Gabpa	GA-binding protein alpha chain [Source:RefSeq peptide;Acc:NP_001102311]	11	24.324	24.3528	13.6993	13.7209	0.625372	0.969372	0	0	0.677611	1	1.00414	-0.0431575	0.600006	0	2.37342
ENSRNOG00000001551	Atp5j	ATP synthase-coupling factor 6, mitochondrial [Source:UniProtKB/Swiss-Prot;Acc:P21571]	11	24.3167	24.3238	13.6939	13.6992	NA	NA	0	0	0.67357	1	1.03081	0.10664	0.193998	0	6.46028
ENSRNOG00000001554	RGD1563888	uncharacterized protein LOC360692 [Source:RefSeq peptide;Acc:NP_001101782]	11	17.4463	17.4764	8.55748	8.57998	0.059763	1.16129	0	0	0.19848	1	1.33085	0.0243069	0.767803	0	2.16531
ENSRNOG00000001555	Btg3	protein BTG3 [Source:RefSeq peptide;Acc:NP_062163]	11	17.2416	17.2578	8.40446	8.41658	0.409381	1.03789	0	0	0.963997	1	0.974648	-0.0850225	0.300915	0	3.23567
ENSRNOG00000001556	LOC100360986		3	58.352	58.3568	48.7474	48.751	NA	NA	0	0	0.518351	1	1.06631	0.177423	0.0298507	0	3.43905
ENSRNOG00000001557	Cxadr	Coxsackievirus and adenovirus receptor homolog [Source:UniProtKB/Swiss-Prot;Acc:Q9R066]	11	17.1935	17.2415	8.36848	8.40439	NA	NA	0	0	0.851619	1	0.945555	0.0348549	0.671973	0	3.25772
ENSRNOG00000001559	Mtx2	metaxin-2 [Source:RefSeq peptide;Acc:NP_001008287]	3	57.4609	57.5234	48.075	48.1222	0.951336	1.00779	0	0	0.788554	1	1.01757	-0.201142	0.0135816	0	3.10909
ENSRNOG00000001573	Usp25	ubiquitin carboxyl-terminal hydrolase 25 [Source:RefSeq peptide;Acc:NP_001100584]	11	15.7998	15.9078	7.32654	7.40725	0.243713	0.936202	0	0	0.683243	1	0.882497	-0.00682164	0.933971	0	3.7472
ENSRNOG00000001575	Grik1	glutamate receptor, ionotropic kainate 1 isoform 3 [Source:RefSeq peptide;Acc:NP_001104584]	11	27.7039	28.1063	16.1646	16.4301	NA	NA	0	0	0.529554	1	1.08228	0.0565128	0.492148	0	1.86524
ENSRNOG00000001582	Bach1	transcription regulator protein BACH1 [Source:RefSeq peptide;Acc:NP_001100583]	11	27.4672	27.5002	16.0084	16.0301	NA	NA	0	0	0.844921	1	1.05777	-0.246514	0.00235804	0	1.86495
ENSRNOG00000001584	LOC304131	Map3k7 C-terminal like [Source:MGI Symbol;Acc:MGI:2446584]	11	27.3165	27.3608	15.9089	15.9381	NA	NA	0	0	0.848481	1	1.05753	-0.0498031	0.545023	0	0.780425
ENSRNOG00000001585	Nrip1	nuclear receptor interacting protein 1 [Source:RefSeq peptide;Acc:NP_001094030]	11	15.0702	15.0736	6.78102	6.78363	NA	NA	0	0	0.361755	1	0.848267	0.0213681	0.795215	0	2.21794
ENSRNOG00000001592	Cct8	T-complex protein 1 subunit theta [Source:RefSeq peptide;Acc:NP_001099367]	11	27.2337	27.2454	15.8542	15.8619	0.884555	1.00344	0	0	0.661913	1	1.05024	-0.0827771	0.313908	0	5.59804
ENSRNOG00000001593	Lnp	protein lunapark [Source:RefSeq peptide;Acc:NP_001070897]	3	57.1372	57.1988	47.8308	47.8773	NA	NA	0	0	0.515403	1	1.05579	0.0606712	0.460799	0	3.89648
ENSRNOG00000001596	AT5G3_RAT	ATP synthase lipid-binding protein, mitochondrial precursor [Source:RefSeq peptide;Acc:NP_446208]	3	56.5117	56.5141	47.3589	47.3607	0.443356	0.984029	0	0	1	1	1.01825	-0.189393	0.0202743	0	6.4522
ENSRNOG00000001597	Atf2	Cyclic AMP-dependent transcription factor ATF-2 [Source:UniProtKB/Swiss-Prot;Acc:Q00969]	3	56.4272	56.4965	47.2951	47.3473	0.344985	0.915401	0	0	0.844285	1	0.969362	-0.166797	0.0413442	0	5.1056
ENSRNOG00000001598	Usp16	Ubiquitin carboxyl-terminal hydrolase 16 [Source:UniProtKB/Swiss-Prot;Acc:Q2KJ09]	11	27.2048	27.2339	15.8351	15.8544	NA	NA	0	0	0.619418	1	1.05127	0.0357865	0.663732	0	2.74927
ENSRNOG00000001599	Rwdd2b	RWD domain-containing protein 2B [Source:RefSeq peptide;Acc:NP_001094029]	11	27.1892	27.1979	15.8249	15.8306	NA	NA	0	0	0.441622	1	0.888163	-0.0978089	0.233753	0	2.26981
ENSRNOG00000001602	Rnf160	zinc finger protein 294 [Source:RefSeq peptide;Acc:NP_001019406]	11	27.1263	27.1841	15.7833	15.8215	0.0118507	0.873374	0	0	0.332213	1	0.838163	0.107509	0.190367	0	2.78243
ENSRNOG00000001603	D4ACA2_RAT	N(6)-adenine-specific DNA methyltransferase 1 [Source:RefSeq peptide;Acc:NP_001178521]	11	27.1071	27.1193	15.7707	15.7787	NA	NA	0	0	0.120062	1	1.37066	-0.0676404	0.41083	0	2.15631
ENSRNOG00000001607	Adamts1	A disintegrin and metalloproteinase with thrombospondin motifs 1 precursor [Source:RefSeq peptide;Acc:NP_077376]	11	25.4343	25.4431	14.5294	14.5361	NA	NA	0	0	0.00223903	0.528604	2.01127	0.0386969	0.638248	0	0.982484
ENSRNOG00000001608	Fam55c	protein FAM55C [Source:RefSeq peptide;Acc:NP_001102905]	11	45.7144	45.771	28.0515	28.0888	0.950315	1.00118	0	0	0.542743	1	0.936797	-0.121636	0.138134	0	2.83063
ENSRNOG00000001609	Cep97	centrosomal protein of 97 kDa [Source:RefSeq peptide;Acc:NP_001100566]	11	45.6589	45.6871	28.0149	28.0335	NA	NA	0	0	0.686952	1	1.06883	-0.0944327	0.250368	0	2.51756
ENSRNOG00000001611	Rpl24	60S ribosomal protein L24 [Source:UniProtKB/Swiss-Prot;Acc:P83732]	11	45.6288	45.6342	27.995	27.9986	NA	NA	0	0	0.94848	1	0.974832	0.0911081	0.26751	0	6.58977
ENSRNOG00000001613	Zbtb11	zinc finger and BTB domain-containing protein 11 [Source:RefSeq peptide;Acc:NP_001100567]	11	45.5912	45.626	27.9702	27.9931	0.697146	1.01732	0	0	0.328607	1	1.10067	-0.068604	0.40418	0	3.66113
ENSRNOG00000001616	Senp7	Sentrin-specific protease 7 [Source:UniProtKB/Swiss-Prot;Acc:D3ZF42]	11	45.3905	45.5396	27.8377	27.9362	0.897828	1.0055	0	0	0.981232	1	0.971494	0.0852145	0.299821	0	2.42385
ENSRNOG00000001620	D3ZUH8_RAT	Uncharacterized protein [Source:UniProtKB/TrEMBL;Acc:F1M540]	11	37.8098	37.8676	22.8345	22.8726	0.790096	0.961374	0	0	0.786687	1	1.07055	-0.148106	0.0704917	0	1.86284
ENSRNOG00000001621	C2cd2	C2 domain-containing protein 2 [Source:RefSeq peptide;Acc:NP_955423]	11	37.8734	37.9351	22.8764	22.9171	NA	NA	0	0	0.90092	1	1.03221	-0.0832464	0.311162	0	1.68154
ENSRNOG00000001623	Znf295	zinc finger protein 295 [Source:RefSeq peptide;Acc:NP_001100575]	11	37.9606	37.9733	22.934	22.9424	NA	NA	0	0	0.786613	1	1.05525	-0.165707	0.0427091	0	2.49941
ENSRNOG00000001627	F1M9R3_RAT		11	44.8535	45.0187	27.4833	27.5923	0.596155	1.03259	0	0	0.128619	1	0.804908	0.0403876	0.623633	0	0.872909
ENSRNOG00000001628	Pcp4	Purkinje cell protein 4 [Source:UniProtKB/Swiss-Prot;Acc:P63055]	11	36.8283	36.8894	22.1867	22.227	0.695058	1.02227	0	0	0.483703	1	0.984266	0.133204	0.104159	0	7.61285
ENSRNOG00000001629	Wrb	Tail-anchored protein insertion receptor WRB [Source:UniProtKB/Swiss-Prot;Acc:Q6P6S5]	11	36.4533	36.4672	21.9392	21.9484	0.413332	0.962222	0	0	0.474888	1	0.938884	-0.00877018	0.915173	0	4.05881
ENSRNOG00000001632	D4AAI9_RAT	bromodomain and WD repeat domain containing 1 [Source:MGI Symbol;Acc:MGI:1890651]	11	36.2958	36.3862	21.8352	21.8949	NA	NA	0	0	0.558606	1	1.0499	-0.060465	0.462328	0	2.76736
ENSRNOG00000001633	Tfg	protein TFG [Source:RefSeq peptide;Acc:NP_001012144]	11	44.8268	44.8531	27.4657	27.483	0.320153	0.973329	0	0	0.765534	1	0.926146	-0.0791218	0.335827	0	4.33576
ENSRNOG00000001640	Tomm70a	Mitochondrial import receptor subunit TOM70 [Source:UniProtKB/Swiss-Prot;Acc:Q75Q39]	11	44.3025	44.3413	27.1197	27.1452	NA	NA	0	0	0.726433	1	1.0047	0.0216419	0.79265	0	5.20978
ENSRNOG00000001642	D4AAH9_RAT	TBC1 domain family, member 23 (Predicted), isoform CRA_a; Uncharacterized protein [Source:UniProtKB/TrEMBL;Acc:D4AAH9]	11	44.2267	44.2853	27.0697	27.1083	0.847871	0.988761	0	0	0.804266	1	0.990527	0.0359341	0.66243	0	3.45162
ENSRNOG00000001643	D4AAH6_RAT	proteasome assembly chaperone 1 [Source:RefSeq peptide;Acc:NP_001099361]	11	36.2836	36.293	21.8272	21.8334	0.36057	1.03218	0	0	0.546117	1	0.912194	0.0748034	0.362948	0	3.93818
ENSRNOG00000001645	RGD1565927	Protein RGD1565927 [Source:UniProtKB/TrEMBL;Acc:D4A900]	11	43.7903	43.8599	26.7816	26.8276	NA	NA	0	0	0.360745	1	0.822321	0.0371501	0.651742	0	1.65892
ENSRNOG00000001647	Ets2	protein C-ets-2 [Source:RefSeq peptide;Acc:NP_001100577]	11	36.0176	36.0289	21.6516	21.659	NA	NA	0	0	0.407844	1	1.11609	-0.020584	0.802572	0	3.64575
ENSRNOG00000001651	Dcbld2	discoidin, CUB and LCCL domain-containing protein 2 precursor [Source:RefSeq peptide;Acc:NP_569103]	11	42.9418	42.9802	26.2216	26.247	NA	NA	0	0	0.903773	1	0.993936	-0.00998445	0.903482	0	2.82057
ENSRNOG00000001652	Erg	transcriptional regulator ERG [Source:RefSeq peptide;Acc:NP_596888]	11	35.6555	35.7601	21.4126	21.4816	NA	NA	0	0	0.939252	1	0.963099	0.0194373	0.813364	0	1.41667
ENSRNOG00000001653	St3gal6	type 2 lactosamine alpha-2,3-sialyltransferase [Source:RefSeq peptide;Acc:NP_997485]	11	42.8937	42.9378	26.1898	26.2189	0.481687	1.06257	0	0	0.555948	1	0.828786	-0.130214	0.112237	0	2.45043
ENSRNOG00000001654	Cpox	Coproporphyrinogen-III oxidase, mitochondrial [Source:UniProtKB/Swiss-Prot;Acc:Q3B7D0]	11	42.7487	42.7587	26.0941	26.1007	0.03777	1.13269	0	0	0.474801	1	1.12282	-0.0371128	0.652069	0	3.24313
ENSRNOG00000001657	Cldnd1	claudin domain-containing protein 1 [Source:RefSeq peptide;Acc:NP_001006956]	11	42.6947	42.7009	26.0585	26.0626	0.794008	1.00769	0	0	0.693406	1	0.959286	0.123787	0.131247	0	4.65906
ENSRNOG00000001658	IRK6_RAT	G protein-activated inward rectifier potassium channel 2 [Source:RefSeq peptide;Acc:NP_037324]	11	35.0251	35.117	20.9966	21.0572	0.106719	0.950479	0	0	0.691484	1	0.902608	-0.0804001	0.328053	0	4.27285
ENSRNOG00000001662	Dyrk1a	Dual specificity tyrosine-phosphorylation-regulated kinase 1A [Source:UniProtKB/Swiss-Prot;Acc:Q63470]	11	34.8797	34.971	20.9006	20.9609	0.303312	0.916783	0	0	0.946397	1	0.981457	-0.087332	0.287928	0	4.16427
ENSRNOG00000001680	Mina	Myc-induced nuclear antigen [Source:UniProtKB/Swiss-Prot;Acc:Q8CFC1]	11	41.6263	41.6495	25.3534	25.3687	0.296269	1.10997	0	0	0.932836	1	0.90759	0.0356976	0.664517	0	2.11299
ENSRNOG00000001681	Dscr3	Down syndrome critical region protein 3 [Source:RefSeq peptide;Acc:NP_001101786]	11	34.7783	34.8031	20.8337	20.85	NA	NA	0	0	0.989608	1	1.03106	-0.131876	0.107689	0	2.68603
ENSRNOG00000001682	Ttc3	E3 ubiquitin-protein ligase TTC3 [Source:RefSeq peptide;Acc:NP_001101785]	11	34.6171	34.659	20.7273	20.755	NA	NA	0	0	0.611571	1	0.997067	-0.0242144	0.768661	0	3.96626
ENSRNOG00000001686	Hlcs	Protein Hlcs [Source:UniProtKB/TrEMBL;Acc:D4AA38]	11	34.382	34.526	20.5721	20.6672	NA	NA	0	0	0.164265	1	1.211	-0.118613	0.148271	0	2.20592
ENSRNOG00000001687	Crybg3	Protein Crybg3 [Source:UniProtKB/TrEMBL;Acc:F1M8T4]	11	41.5641	41.6256	25.3123	25.3529	NA	NA	0	0	0.839572	1	1.02184	-0.185811	0.0228139	0	1.52518
ENSRNOG00000001689	B1WC73_RAT	ADP-ribosylation factor-like protein 6 [Source:RefSeq peptide;Acc:NP_001102312]	11	41.4738	41.4997	25.2527	25.2698	0.0488642	1.10233	0	0	0.615841	1	1.01054	0.154716	0.0587007	0	3.80399
ENSRNOG00000001699	Setd4	SET domain-containing protein 4 [Source:RefSeq peptide;Acc:NP_001107219]	11	33.7654	33.7855	20.1652	20.1784	0.0092758	0.779346	0	0	0.308788	1	0.906105	0.0821833	0.317404	0	2.17125
ENSRNOG00000001700	Dfnb31	whirlin [Source:RefSeq peptide;Acc:NP_851602]	5	80.3827	80.4648	49.1028	49.1371	NA	NA	0	0	0.223684	1	1.27997	-0.0317614	0.699615	0	3.73027
ENSRNOG00000001701	Cbr3	carbonyl reductase [Source:RefSeq peptide;Acc:NP_001100580]	11	33.914	33.9222	20.2632	20.2687	0.0985928	1.18828	0	0	0.256335	1	1.33348	-0.0252971	0.758628	0	1.93922
ENSRNOG00000001704	Runx1	Runt-related transcription factor 1 [Source:UniProtKB/Swiss-Prot;Acc:Q63046]	11	32.6235	32.7254	19.4115	19.4788	NA	NA	0	0	0.474612	1	1.18474	-0.155355	0.0576536	0	0.790211
ENSRNOG00000001706	Kalrn	kalirin [Source:RefSeq peptide;Acc:NP_114451]	11	68.1953	68.6113	47.7172	47.9668	0.926424	1.00304	0	0	0.760752	1	1.0195	0.0918139	0.263806	0	5.25906
ENSRNOG00000001707	Vwa5b2	von Willebrand factor A domain-containing protein 5B2 [Source:RefSeq peptide;Acc:NP_001128007]	11	82.5357	82.5528	55.4	55.4	0.452981	1.08013	0	0	0.864934	1	1.01648	0.00382951	0.962904	0	2.86356
ENSRNOG00000001708	Dvl3	segment polarity protein dishevelled homolog DVL-3 [Source:RefSeq peptide;Acc:NP_001100551]	11	82.5977	82.6219	55.4	55.4	NA	NA	0	0	0.767005	1	1.05595	-0.00979244	0.905329	0	3.67697
ENSRNOG00000001709	Ap2m1	AP-2 complex subunit mu [Source:UniProtKB/Swiss-Prot;Acc:P84092]	11	82.5855	82.5918	55.4	55.4	0.988203	0.999164	0	0	0.673785	1	0.962748	-0.0359999	0.66185	0	7.74568
ENSRNOG00000001710	Abcf3	ATP-binding cassette sub-family F member 3 [Source:UniProtKB/Swiss-Prot;Acc:Q66H39]	11	82.5705	82.5822	55.4	55.4	0.108492	0.928532	0	0	0.89176	1	1.00336	0.128733	0.116415	0	3.95805
ENSRNOG00000001711	Hrasls	HRAS-like suppressor [Source:RefSeq peptide;Acc:NP_001099341]	11	73.421	73.4393	50.8526	50.8636	0.0997521	0.899491	0	0	0.240544	1	1.17364	-0.0145944	0.859305	0	1.76978
ENSRNOG00000001712	Alg3	dolichyl-P-Man:Man(5)GlcNAc(2)-PP-dolichyl mannosyltransferase [Source:RefSeq peptide;Acc:NP_001135835]	11	82.5316	82.5353	55.4	55.4	0.144422	0.900519	0	0	0.76047	1	0.958914	0.0594267	0.470064	0	3.66536
ENSRNOG00000001713			11	73.1477	73.1489	50.6886	50.6894	NA	NA	0	0	0.803323	1	0.887244	0.219094	0.00706619	0	0.699748
ENSRNOG00000001714	Atp13a4	probable cation-transporting ATPase 13A4 [Source:RefSeq peptide;Acc:NP_001178587]	11	73.1673	73.2511	50.7004	50.7506	NA	NA	0	0	0.675648	1	1.00871	0.0503472	0.540634	0	1.38963
ENSRNOG00000001715	Ece2	endothelin-converting enzyme 2 [Source:RefSeq peptide;Acc:NP_001002815]	11	82.493	82.5296	55.4	55.4	0.491503	1.02755	0	0	0.797027	1	1.05362	0.16922	0.0384401	0	2.75524
ENSRNOG00000001717	Opa1	Dynamin-like 120 kDa protein, mitochondrial Dynamin-like 120 kDa protein, form S1 [Source:UniProtKB/Swiss-Prot;Acc:Q2TA68]	11	73.0055	73.0582	50.6033	50.6349	NA	NA	0	0	0.720438	1	0.933497	0.00267212	0.974111	0	4.54779
ENSRNOG00000001719	Psmd2	26S proteasome non-ATPase regulatory subunit 2 [Source:UniProtKB/Swiss-Prot;Acc:Q4FZT9]	11	82.4782	82.4888	55.4	55.4	0.201382	0.965158	0	0	0.578512	1	0.967203	0.0907686	0.269305	0	5.35964
ENSRNOG00000001720	D4ADT9_RAT	transcription factor HES-1 [Source:RefSeq peptide;Acc:NP_077336]	11	72.6039	72.6062	50.3623	50.3637	NA	NA	0	0	0.530896	1	1.06939	-0.0816944	0.320301	0	1.71726
ENSRNOG00000001724	LOC678704	ATPase type 13A3 [Source:RefSeq peptide;Acc:NP_001102839]	11	72.2631	72.3369	50.1579	50.2022	NA	NA	0	0	0.869503	1	1.005	0.117794	0.151114	0	3.16889
ENSRNOG00000001726	Tmem44	Protein Tmem44 [Source:UniProtKB/TrEMBL;Acc:D4ADT4]	11	72.0628	72.0833	50.0377	50.05	NA	NA	0	0	0.604308	1	0.890647	0.111728	0.173451	0	2.52435
ENSRNOG00000001727	Lsg1	Large subunit GTPase 1 homolog [Source:UniProtKB/Swiss-Prot;Acc:Q5BJT6]	11	72.0268	72.0514	50.0161	50.0308	0.808553	1.01175	0	0	0.759708	1	1.06376	-0.011789	0.886146	0	2.80495
ENSRNOG00000001728	Fam43a	protein FAM43A [Source:RefSeq peptide;Acc:NP_001034091]	11	72.0114	72.0127	50.0068	50.0076	NA	NA	0	0	0.203911	1	1.40055	-0.117575	0.15188	0	2.83503
ENSRNOG00000001729	RGD1308154	Protein RGD1308154 [Source:UniProtKB/TrEMBL;Acc:D4ADL7]	11	71.533	71.6587	49.7198	49.7952	NA	NA	0	0	0.579003	1	0.90405	0.0550532	0.503414	0	2.31613
ENSRNOG00000001730	Acap2	Arf-GAP with coiled-coil, ANK repeat and PH domain-containing protein 2 [Source:UniProtKB/Swiss-Prot;Acc:Q5FVC7]	11	71.4117	71.5248	49.647	49.7149	NA	NA	0	0	0.708812	1	1.02125	-0.0576471	0.483486	0	3.63757
ENSRNOG00000001733	Ppp1r2	Protein phosphatase inhibitor 2 [Source:UniProtKB/Swiss-Prot;Acc:P50411]	11	71.3193	71.3427	49.5916	49.6056	0.631296	1.01974	0	0	0.425039	1	1.14833	0.0908468	0.26889	0	5.89212
ENSRNOG00000001736	Bdh1	D-beta-hydroxybutyrate dehydrogenase, mitochondrial [Source:UniProtKB/Swiss-Prot;Acc:P29147]	11	71.1306	71.1657	49.4783	49.4994	0.0305486	0.850153	0	0	0.37192	1	0.886161	-0.0657594	0.423993	0	3.44997
ENSRNOG00000001738	LOC682402	Protein Eif4g1 [Source:UniProtKB/TrEMBL;Acc:D3ZU13]	11	82.452	82.4717	55.4	55.4	NA	NA	0	0	0.948932	1	0.997166	-0.16716	0.0408982	0	4.32877
ENSRNOG00000001739	Mfi2	melanotransferrin precursor [Source:RefSeq peptide;Acc:NP_001099342]	11	70.7064	70.7282	49.2238	49.2369	0.599579	0.97427	0	0	0.56226	1	1.05174	0.112115	0.171955	0	0.990773
ENSRNOG00000001741	LOC100364604	NA	11	82.4424	82.4495	55.4	55.4	NA	NA	0	0	0.936878	1	0.980601	0.0791929	0.335391	0	5.54725
ENSRNOG00000001742	Clcn2	Chloride channel protein 2 [Source:UniProtKB/Swiss-Prot;Acc:P35525]	11	82.4278	82.4413	55.4	55.4	0.10465	0.900543	0	0	0.931605	1	1.00861	0.0746594	0.363875	0	3.37749
ENSRNOG00000001746	Pigz	Nuclear cap-binding protein subunit 2 [Source:UniProtKB/Swiss-Prot;Acc:B1WC40]	11	70.6429	70.6517	49.1857	49.191	0.525398	1.0354	0	0	0.388813	1	1.07444	-0.0515277	0.531171	0	4.14245
ENSRNOG00000001747	Pak2	Serine/threonine-protein kinase PAK 2 PAK-2p27 PAK-2p34 [Source:UniProtKB/Swiss-Prot;Acc:Q64303]	11	70.53	70.5885	49.118	49.1531	NA	NA	0	0	0.791057	1	1.03819	0.0286395	0.727917	0	3.7504
ENSRNOG00000001748	Polr2h	polymerase (RNA) II (DNA directed) polypeptide H [Source:RefSeq peptide;Acc:NP_001128261]	11	82.4217	82.4261	55.4	55.4	NA	NA	0	0	0.604597	1	0.916124	-0.0553518	0.501098	0	2.91167
ENSRNOG00000001749	Thpo	NA	11	82.4126	82.4178	55.4	55.4	NA	NA	0	0	0.870287	1	0.970204	-0.120539	0.14175	0	1.37962
ENSRNOG00000001750	Chrd	Chordin [Source:UniProtKB/Swiss-Prot;Acc:Q63148]	11	82.4017	82.4104	55.4	55.4	NA	NA	0	0	0.671882	1	1.05432	0.00969644	0.906253	0	1.99586
ENSRNOG00000001752	Lrrc33	Leucine-rich repeat-containing protein 33 [Source:UniProtKB/Swiss-Prot;Acc:Q5BK65]	11	70.4491	70.4664	49.0695	49.0798	0.451308	0.956202	0	0	0.422515	1	0.855481	-0.00789014	0.923658	0	0.973129
ENSRNOG00000001753	RGD1311861	F-box protein 45 [Source:MGI Symbol;Acc:MGI:2447775]	11	70.3716	70.3836	49.023	49.0302	NA	NA	0	0	0.742569	1	1.01779	-0.0955617	0.244724	0	3.27796
ENSRNOG00000001754	Wdr53	WD repeat-containing protein 53 [Source:RefSeq peptide;Acc:NP_001102525]	11	70.3624	70.3707	49.0174	49.0224	NA	NA	0	0	0.576028	1	0.869195	0.00528735	0.948799	0	1.86553
ENSRNOG00000001756	D3ZDR3_RAT		11	70.2168	70.2782	48.9301	48.9669	NA	NA	0	0	0.821264	1	1.01026	0.04024	0.624903	0	2.8154
ENSRNOG00000001757	Tm4sf19	transmembrane 4 L6 family member 19 [Source:RefSeq peptide;Acc:NP_001099343]	11	70.1897	70.2015	48.9138	48.9209	NA	NA	0	0	0.288473	1	1.6233	-0.0885569	0.281194	0	0.832029
ENSRNOG00000001758	Tctex1d2	tctex1 domain-containing protein 2 [Source:RefSeq peptide;Acc:NP_001102524]	11	70.1755	70.1838	48.9053	48.9103	0.73361	0.969366	0	0	0.314441	1	0.79135	-0.123131	0.133319	0	2.75987
ENSRNOG00000001762	Pcyt1a	Choline-phosphate cytidylyltransferase A [Source:UniProtKB/Swiss-Prot;Acc:P19836]	11	70.1306	70.1737	48.8783	48.9042	NA	NA	0	0	0.732849	1	1.05332	-0.131288	0.109282	0	3.34946
ENSRNOG00000001764	Vps8	Protein Vps8 [Source:UniProtKB/TrEMBL;Acc:D4A5F7]	11	81.636	81.8567	55.4	55.4	NA	NA	0	0	0.16751	1	0.834817	0.116249	0.156586	0	3.29313
ENSRNOG00000001766	Tfrc	transferrin receptor protein 1 [Source:RefSeq peptide;Acc:NP_073203]	11	69.9779	69.9936	48.7867	48.7962	NA	NA	0	0	0.401202	1	1.12561	0.0497658	0.545325	0	3.75381
ENSRNOG00000001767	RGD1562339	Protein RGD1562339 [Source:UniProtKB/TrEMBL;Acc:D4AC80]	11	81.5787	81.6252	55.4	55.4	NA	NA	0	0	0.343301	1	1.17898	-0.173457	0.0337749	0	3.78302
ENSRNOG00000001769	Tnk2	activated CDC42 kinase 1 [Source:RefSeq peptide;Acc:NP_001008337]	11	69.9296	69.9669	48.7578	48.7801	NA	NA	0	0	0.248328	1	1.21074	0.0209521	0.799117	0	4.68857
ENSRNOG00000001770	Ehhadh	Peroxisomal bifunctional enzyme Enoyl-CoA hydratase/3,2-trans-enoyl-CoA isomerase 3-hydroxyacyl-CoA dehydrogenase [Source:UniProtKB/Swiss-Prot;Acc:P07896]	11	81.4742	81.5077	55.4	55.4	NA	NA	0	0	0.0383661	1	1.684	0.124183	0.130007	0	0.782642
ENSRNOG00000001773	Senp2	Sentrin-specific protease 2 [Source:UniProtKB/Swiss-Prot;Acc:Q9EQE1]	11	81.2257	81.2599	55.4	55.4	0.405419	0.938418	0	0	0.908385	1	0.939926	0.0130673	0.873899	0	4.54795
ENSRNOG00000001774	D3ZWD1_RAT		11	69.5955	69.6922	48.5573	48.6153	NA	NA	0	0	0.685516	1	1.06857	-0.0909588	0.268298	0	2.62708
ENSRNOG00000001781	D4AC69_RAT	leishmanolysin-like peptidase [Source:RefSeq peptide;Acc:NP_001102313]	11	69.4811	69.5471	48.4887	48.5283	NA	NA	0	0	0.675715	1	0.972395	0.093078	0.257259	0	1.60548
ENSRNOG00000001782	Osbpl11	oxysterol-binding protein-related protein 11 [Source:RefSeq peptide;Acc:NP_001100560]	11	69.3562	69.4185	48.4137	48.4511	0.231898	1.06754	0	0	0.786348	1	0.960843	-0.00640918	0.937955	0	2.24349
ENSRNOG00000001783	Tra2b	Transformer-2 protein homolog beta [Source:UniProtKB/Swiss-Prot;Acc:P62997]	11	81.0267	81.0449	55.4	55.4	NA	NA	0	0	0.981893	1	0.95074	-0.129131	0.11528	0	5.12124
ENSRNOG00000001785	Etv5	ETS translocation variant 5 [Source:RefSeq peptide;Acc:NP_001100552]	11	80.8463	80.904	55.3078	55.3424	0.576935	0.908498	0	0	0.465516	1	1.06214	-0.216607	0.00775908	0	4.15019
ENSRNOG00000001786	Snx4	sorting nexin-4 [Source:RefSeq peptide;Acc:NP_001121022]	11	69.283	69.3404	48.3698	48.4043	0.160317	1.06993	0	0	0.773817	1	0.936932	0.0228028	0.781799	0	3.88802
ENSRNOG00000001789	Zfp148	Zinc finger protein 148 [Source:UniProtKB/Swiss-Prot;Acc:Q62806]	11	69.1037	69.2137	48.2622	48.3282	0.810403	0.992295	0	0	0.917632	1	0.962825	-0.137786	0.092678	0	4.28173
ENSRNOG00000001793	F1M3W7_RAT		11	68.8287	68.8892	48.0972	48.1335	NA	NA	0	0	0.422748	1	0.873905	-0.0967457	0.2389	0	2.82922
ENSRNOG00000001795	D4AC54_RAT	integrin, beta 5 precursor [Source:RefSeq peptide;Acc:NP_671480]	11	68.6422	68.7592	47.9853	48.0555	0.101079	1.0768	0	0	0.58783	1	1.10486	-0.0282004	0.731928	0	3.39768
ENSRNOG00000001796	Dgkg	Diacylglycerol kinase gamma [Source:UniProtKB/Swiss-Prot;Acc:P49620]	11	80.6232	80.8148	55.1739	55.2889	0.542258	1.06376	0	0	0.86686	1	1.04558	0.0111952	0.891845	0	3.51176
ENSRNOG00000001797	Umps	uridine 5'-monophosphate synthase [Source:RefSeq peptide;Acc:NP_001020573]	11	68.6198	68.6302	47.9719	47.9781	0.838116	0.983457	0	0	0.724641	1	0.961568	0.0059416	0.942473	0	3.01476
ENSRNOG00000001803	Dnajb11	DnaJ homolog subfamily B member 11 [Source:UniProtKB/Swiss-Prot;Acc:Q6TUG0]	11	80.3604	80.3769	55.0162	55.0261	0.168437	1.10707	0	0	0.657768	1	1.01921	-0.0306823	0.709354	0	4.05537
ENSRNOG00000001804	ITPR2_RAT	inositol 1,4,5-trisphosphate receptor type 2 [Source:RefSeq peptide;Acc:NP_112308]	4	183.678	183.988	106.7	106.7	NA	NA	0	0	0.418748	1	0.906317	0.0265274	0.747277	0	1.57949
ENSRNOG00000001807	Sspn	sarcospan [Source:RefSeq peptide;Acc:NP_001102725]	4	183.546	183.579	106.7	106.7	0.0772446	0.92005	0	0	0.236442	1	0.804525	0.00200009	0.98062	0	1.86377
ENSRNOG00000001808	LOC690728	asunder, spermatogenesis regulator homolog (Drosphila) [Source:RefSeq peptide;Acc:NP_001103078]	4	184.121	184.153	106.7	106.7	NA	NA	0	0	0.497812	1	1.06809	-0.0665932	0.418128	0	3.08027
ENSRNOG00000001811	Fgfr1op2	FGFR1 oncogene partner 2 homolog [Source:UniProtKB/Swiss-Prot;Acc:Q6TA25]	4	184.153	184.174	106.7	106.7	0.355287	0.95521	0	0	0.49029	1	1.04626	-0.177788	0.0295104	0	4.5467
ENSRNOG00000001813	DNM1L_RAT	Dynamin-1-like protein [Source:UniProtKB/Swiss-Prot;Acc:O35303]	11	86.6166	86.6658	55.4	55.4	0.800354	0.9901	0	0	0.78595	1	0.987201	-0.166333	0.0419208	0	5.64585
ENSRNOG00000001815	Eif4a2	Eukaryotic initiation factor 4A-II [Source:UniProtKB/Swiss-Prot;Acc:Q5RKI1]	11	79.9506	79.9572	54.7704	54.7743	0.0178491	0.953671	0	0	0.797336	1	0.921388	0.165526	0.0429398	0	7.6551
ENSRNOG00000001816	Rfc4	replication factor C subunit 4 [Source:RefSeq peptide;Acc:NP_001099339]	11	79.9353	79.9506	54.7612	54.7704	NA	NA	0	0	0.337207	1	1.16075	0.00564826	0.945309	0	2.30834
ENSRNOG00000001817	Tm7sf3	Transmembrane 7 superfamily member 3 [Source:UniProtKB/Swiss-Prot;Acc:Q5FVF4]	4	184.18	184.213	106.7	106.7	0.000605202	1.286	1	1	0.241255	1	1.18608	-0.0571564	0.487223	0	3.66685
ENSRNOG00000001818	FGD4_RAT	FYVE, RhoGEF and PH domain-containing protein 4 [Source:RefSeq peptide;Acc:NP_640356]	11	86.7014	86.7678	55.4	55.4	NA	NA	0	0	0.811107	1	0.915458	0.0316992	0.700176	0	2.55756
ENSRNOG00000001820	D4AA11_RAT	mediator of RNA polymerase II transcription subunit 21 [Source:RefSeq peptide;Acc:NP_001101365]	4	184.223	184.23	106.7	106.7	0.329311	0.963569	0	0	0.47955	1	1.2016	-0.203997	0.0122823	0	3.53759
ENSRNOG00000001823	St6gal1	beta-galactoside alpha-2,6-sialyltransferase 1 isoform 2 [Source:RefSeq peptide;Acc:NP_671738]	11	79.7233	79.7656	54.634	54.6594	0.0059203	0.937528	0	0	0.262806	1	0.86584	0.00783858	0.924155	0	2.59501
ENSRNOG00000001825	Pkp2	plakophilin 2 [Source:MGI Symbol;Acc:MGI:1914701]	11	86.5535	86.5844	55.4	55.4	NA	NA	0	0	0.778279	1	1.1281	0.114933	0.161361	0	1.93607
ENSRNOG00000001827	Masp1	Mannan-binding lectin serine protease 1 Mannan-binding lectin serine protease 1 heavy chain Mannan-binding lectin serine protease 1 light chain [Source:UniProtKB/Swiss-Prot;Acc:Q8CHN8]	11	79.5325	79.6151	54.5195	54.569	NA	NA	0	0	0.953172	1	1.00206	-0.118174	0.149789	0	3.03092
ENSRNOG00000001828	D4AA09_RAT	serine/threonine-protein kinase 38-like [Source:RefSeq peptide;Acc:NP_001076805]	4	184.357	184.371	106.7	106.7	NA	NA	0	0	0.81103	1	0.910696	0.080601	0.326842	0	1.89813
ENSRNOG00000001829	Ube2v2	Ubiquitin-conjugating enzyme E2 variant 2 [Source:UniProtKB/Swiss-Prot;Acc:Q7M767]	11	87.2158	87.2497	55.4	55.4	NA	NA	0	0	0.608523	1	1.05572	-0.130251	0.112134	0	5.58626
ENSRNOG00000001833	RGD1563943	minichromosome maintenance deficient 4 [Source:RefSeq peptide;Acc:NP_387500]	11	87.1699	87.1831	55.4	55.4	NA	NA	0	0	0.602606	1	0.895198	-5.33357512207431e-05	0.999483	0	2.04217
ENSRNOG00000001834	Fam128b	mitotic spindle organizing protein 2B [Source:RefSeq peptide;Acc:NP_001099330]	11	86.9349	86.9408	55.4	55.4	0.36095	0.947068	0	0	0.773348	1	1.12778	-0.0119597	0.884509	0	2.49335
ENSRNOG00000001837	Sst	Somatostatin Antrin Somatostatin-28 Somatostatin-14 [Source:UniProtKB/Swiss-Prot;Acc:P60042]	11	79.125	79.1262	54.275	54.2757	0.020715	1.11765	0	0	0.0637734	1	1.40297	-0.260831	0.00126507	0	6.57384
ENSRNOG00000001842	Mrps35	28S ribosomal protein S35, mitochondrial [Source:RefSeq peptide;Acc:NP_001100098]	4	184.642	184.672	106.7	106.7	0.860171	0.984997	0	0	0.567627	1	1.05671	-0.0110974	0.892784	0	3.65671
ENSRNOG00000001843	Bcl6	B-cell CLL/lymphoma 6 [Source:RefSeq peptide;Acc:NP_001100554]	11	79.0061	79.0306	54.2037	54.2183	0.849375	1.00875	0	0	0.58674	1	1.08359	-0.0706396	0.390345	0	3.30257
ENSRNOG00000001844	Klhdc5	kelch domain-containing protein 5 [Source:RefSeq peptide;Acc:NP_001102727]	4	184.689	184.71	106.7	106.7	0.761148	0.988762	0	0	0.532836	1	1.08086	-0.0792071	0.335304	0	2.28097
ENSRNOG00000001845	Top3b	DNA topoisomerase 3-beta-1 [Source:RefSeq peptide;Acc:NP_001099331]	11	86.1169	86.1453	55.4	55.4	0.237461	0.909632	0	0	1	1	1.02029	0.0292191	0.722633	0	2.66688
ENSRNOG00000001847	Ccdc91	Coiled-coil domain-containing protein 91 [Source:UniProtKB/Swiss-Prot;Acc:Q6AY97]	4	185.188	185.259	106.7	106.7	0.819085	1.01201	0	0	0.823447	1	0.956044	0.11997	0.143653	0	3.29271
ENSRNOG00000001849	Mapk1	Mitogen-activated protein kinase 1 [Source:UniProtKB/Swiss-Prot;Acc:P63086]	11	85.9687	86.0304	55.4	55.4	0.00343614	0.859071	0	0	0.788642	1	1.00385	-0.164095	0.0447976	0	6.74272
ENSRNOG00000001851	Far2	Protein Far2 [Source:UniProtKB/TrEMBL;Acc:D4A2S1]	4	185.759	185.792	106.7	106.7	NA	NA	0	0	0.536525	1	0.892671	0.0405867	0.621922	0	3.55926
ENSRNOG00000001852	Ergic2	endoplasmic reticulum-Golgi intermediate compartment protein 2 [Source:RefSeq peptide;Acc:NP_001020155]	4	185.797	185.828	106.7	106.7	0.479609	1.04402	0	0	0.896621	1	0.941116	0.0756177	0.357733	0	4.5589
ENSRNOG00000001854	D4A9Y4_RAT		4	185.854	186.069	106.7	106.7	NA	NA	0	0	0.902287	1	1.01479	0.00798258	0.922766	0	3.47462
ENSRNOG00000001858	D4A9Y3_RAT	RCG36512; Uncharacterized protein [Source:UniProtKB/TrEMBL;Acc:D4A9Y3]	11	85.9297	85.9418	55.4	55.4	NA	NA	0	0	0.681892	1	1.05764	0.095823	0.24343	0	1.34349
ENSRNOG00000001859	Sdf2l1	stromal cell-derived factor 2-like protein 1 precursor [Source:RefSeq peptide;Acc:NP_001102903]	11	85.8781	85.8803	55.4	55.4	0.0612146	1.32346	0	0	0.156347	1	1.35109	-0.166388	0.041852	0	2.76583
ENSRNOG00000001861	Ydjc	YdjC homolog [Source:RefSeq peptide;Acc:NP_001013885]	11	85.8439	85.8481	55.4	55.4	0.0849465	1.05169	0	0	0.506229	1	1.19609	0.122192	0.136326	0	2.50273
ENSRNOG00000001862	Ube2l3	ubiquitin-conjugating enzyme E2 L3 [Source:RefSeq peptide;Acc:NP_001102317]	11	85.8011	85.8421	55.4	55.4	NA	NA	0	0	0.888316	1	0.997957	-0.261943	0.00120362	0	5.48822
ENSRNOG00000001863	Hic2	hypermethylated in cancer 2 protein [Source:RefSeq peptide;Acc:NP_001099332]	11	85.7407	85.7705	55.4	55.4	NA	NA	0	0	0.273256	1	1.28095	0.0454705	0.580589	0	1.23014
ENSRNOG00000001864	LOC100364951	Protein LOC100364951 [Source:UniProtKB/TrEMBL;Acc:D4A9X5]	11	85.7287	85.7305	55.4	55.4	NA	NA	0	0	0.626518	1	1.18023	0.0940345	0.252381	0	1.22275
ENSRNOG00000001866	Pi4ka	phosphatidylinositol 4-kinase alpha [Source:RefSeq peptide;Acc:NP_071637]	11	85.6103	85.7266	55.4	55.4	0.00146675	0.933137	1	0	0.382863	1	0.902641	-0.073422	0.371902	0	5.33704
ENSRNOG00000001867	Snap29	synaptosomal-associated protein 29 [Source:RefSeq peptide;Acc:NP_446262]	11	85.5792	85.6098	55.4	55.4	0.0765101	1.05858	0	0	0.775561	1	0.954258	-0.17223	0.0350736	0	3.28005
ENSRNOG00000001868	Crkl	Crk-like protein [Source:UniProtKB/Swiss-Prot;Acc:Q5U2U2]	11	85.5202	85.5547	55.4	55.4	0.975982	0.997296	0	0	0.810118	1	1.04095	-0.0731109	0.373938	0	3.56691
ENSRNOG00000001870	Lztr1	leucine-zipper-like transcriptional regulator 1 [Source:RefSeq peptide;Acc:NP_001101796]	11	85.4795	85.4951	55.4	55.4	0.328733	0.978659	0	0	0.777303	1	0.976132	-0.0383769	0.641031	0	3.82631
ENSRNOG00000001872	D3ZZW7_RAT	RIKEN cDNA 4930451C15 gene [Source:MGI Symbol;Acc:MGI:1921935]	11	85.442	85.4588	55.4	55.4	NA	NA	0	0	0.000713675	0.289694	6.6266	-0.159026	0.0519249	0	0.929838
ENSRNOG00000001873	P2rx6	P2X purinoceptor 6 [Source:UniProtKB/Swiss-Prot;Acc:P51579]	11	85.4313	85.4412	55.4	55.4	0.33284	0.949623	0	0	0.395472	1	1.32654	-0.00413885	0.95991	0	1.46309
ENSRNOG00000001874	Slc7a4	cationic amino acid transporter 4 [Source:RefSeq peptide;Acc:NP_001100548]	11	85.4265	85.4302	55.4	55.4	0.972617	1.00305	0	0	0.306177	1	1.21346	-0.0781831	0.34161	0	2.95819
ENSRNOG00000001875	Smpd4	sphingomyelin phosphodiesterase 4 [Source:RefSeq peptide;Acc:NP_001161278]	11	85.353	85.3759	55.4	55.4	NA	NA	0	0	0.710497	1	0.990224	-0.14177	0.0835325	0	2.37774
ENSRNOG00000001877	Med15	mediator of RNA polymerase II transcription subunit 15 [Source:RefSeq peptide;Acc:NP_001101795]	11	85.2705	85.345	55.4	55.4	0.88183	0.995693	0	0	0.761502	1	1.07688	0.0807574	0.325901	0	3.60535
ENSRNOG00000001878	Klhl22	Kelch-like protein 22 [Source:UniProtKB/Swiss-Prot;Acc:D3ZZC3]	11	85.1793	85.2201	55.4	55.4	0.117246	0.944532	0	0	0.982863	1	1.01663	-0.0492893	0.549184	0	4.06653
ENSRNOG00000001880	Dgcr6	protein DGCR6 [Source:RefSeq peptide;Acc:NP_001100550]	11	84.9226	84.9277	55.4	55.4	0.0482117	1.08738	0	0	0.504672	1	1.09043	-0.0772071	0.347689	0	5.18636
ENSRNOG00000001884	Ranbp1	ran-specific GTPase-activating protein [Source:RefSeq peptide;Acc:NP_001101794]	11	84.7364	84.7446	55.4	55.4	NA	NA	0	0	0.224285	1	1.15888	-0.152613	0.0622624	0	5.44227
ENSRNOG00000001885	Trmt2a	tRNA (uracil-5-)-methyltransferase homolog A [Source:RefSeq peptide;Acc:NP_001011895]	11	84.7315	84.7361	55.4	55.4	0.392343	0.948875	0	0	0.533212	1	0.921954	0.0753332	0.359549	0	2.37275
ENSRNOG00000001886	Dgcr8	rno-mir-1306 [Source:miRBase;Acc:MI0021537]	11	84.6988	84.731	55.4	55.4	0.82968	0.988962	0	0	0.553947	1	0.939261	0.140106	0.0872603	0	2.7873
ENSRNOG00000001888	Arvcf	armadillo repeat gene deleted in velo-cardio-facial syndrome [Source:RefSeq peptide;Acc:NP_001124485]	11	84.5822	84.6399	55.4	55.4	0.769721	1.01221	0	0	0.264981	1	1.24037	0.00261523	0.974662	0	2.57673
ENSRNOG00000001889	Comt	Catechol O-methyltransferase [Source:UniProtKB/Swiss-Prot;Acc:P22734]	11	84.5616	84.5817	55.4	55.4	0.0921377	1.40921	0	0	0.52003	1	0.933239	0.0093462	0.909625	0	3.69728
ENSRNOG00000001890	Txnrd2	thioredoxin reductase 2, mitochondrial precursor [Source:RefSeq peptide;Acc:NP_072106]	11	84.5134	84.5617	55.4	55.4	0.126854	1.11629	0	0	0.858813	1	1.02396	-0.072654	0.376939	0	2.12969
ENSRNOG00000001891	Gnb1l	Protein Gnb1l [Source:UniProtKB/TrEMBL;Acc:D4A2F0]	11	84.4271	84.4518	55.4	55.4	NA	NA	0	0	0.115227	1	1.47427	0.142214	0.0825588	0	1.05221
ENSRNOG00000001893	LOC100362453		11	84.2701	84.271	55.4	55.4	NA	NA	0	0	0.447224	1	0.919949	-0.151831	0.0636315	0	5.4132
ENSRNOG00000001896	LOC684557	NA	15	53.707	53.709	30.9102	30.9105	0.201932	0.95015	0	0	0.861123	1	1.00191	-0.084402	0.304469	0	2.62904
ENSRNOG00000001911	Map6d1	MAP6 domain-containing protein 1 [Source:RefSeq peptide;Acc:NP_001102314]	11	82.9817	82.9879	55.4	55.4	NA	NA	0	0	0.0375544	1	1.35787	-0.14942	0.0680063	0	4.13482
ENSRNOG00000001920	F1M485_RAT	NA	11	22.9645	22.9658	12.683	12.684	NA	NA	0	0	1	1	0.992726	-0.210662	0.00966489	0	6.2406
ENSRNOG00000001926	Cldn1	Claudin-1 [Source:UniProtKB/Swiss-Prot;Acc:P56745]	11	76.4737	76.4888	52.6842	52.6933	NA	NA	0	0	0.847957	1	1.24574	0.121275	0.139316	0	0.961327
ENSRNOG00000001928	Il1rap	interleukin-1 receptor accessory protein isoform b precursor [Source:RefSeq peptide;Acc:NP_001161312]	11	76.0928	76.2225	52.4557	52.5335	NA	NA	0	0	0.969042	1	0.981771	-0.0944292	0.250386	0	3.0674
ENSRNOG00000001930	Ccdc50	Coiled-coil domain-containing protein 50 [Source:UniProtKB/Swiss-Prot;Acc:Q810U0]	11	75.3026	75.3605	51.9816	52.0163	NA	NA	0	0	0.327403	1	1.08815	0.076279	0.353532	0	3.38101
ENSRNOG00000001931	Fgf12	Fibroblast growth factor 12 [Source:UniProtKB/Swiss-Prot;Acc:P61150]	11	74.2087	74.481	51.3252	51.4886	NA	NA	0	0	0.967588	1	1.01479	-0.182993	0.0249994	0	5.73159
ENSRNOG00000001947	RGD1559834	NA	X	69.3863	69.3871	NA	NA	NA	NA	0	0	0.74894	1	0.944294	0.0150051	0.855389	0	2.86554
ENSRNOG00000001953	Bace2	Beta-secretase 2 [Source:UniProtKB/Swiss-Prot;Acc:Q6IE75]	11	37.3456	37.4284	22.5281	22.5827	NA	NA	0	0	0.206491	1	0.762121	0.0401583	0.625607	0	1.39324
ENSRNOG00000001956	Dzip3		11	53.0654	53.1341	34.6621	34.7274	0.880543	1.03287	0	0	0.357145	1	0.84855	0.0167723	0.838577	0	3.48316
ENSRNOG00000001958	Ift57	intraflagellar transport protein 57 homolog [Source:RefSeq peptide;Acc:NP_001100563]	11	52.2517	52.3215	33.8891	33.9554	0.692029	1.03544	0	0	0.727383	1	1.04416	-0.0279693	0.734043	0	3.53371
ENSRNOG00000001959	Mx1	interferon-induced GTP-binding protein Mx1 [Source:RefSeq peptide;Acc:NP_775119]	11	37.4385	37.4624	22.5894	22.6052	NA	NA	0	0	0.792863	1	0.948894	-0.0339038	0.680428	0	0.640214
ENSRNOG00000001960	Sult1d1	Sulfotransferase 1 family member D1 [Source:UniProtKB/Swiss-Prot;Acc:G3V9R3]	14	21.9837	22.0022	14.7663	14.7793	NA	NA	0	0	0.000830518	0.301147	0.410272	0.185624	0.0229534	0	2.48849
ENSRNOG00000001963	Mx2	interferon-induced GTP-binding protein Mx2 [Source:RefSeq peptide;Acc:NP_599177]	11	37.5488	37.5727	22.6622	22.678	NA	NA	0	0	0.0995476	1	0.787296	-0.071445	0.384951	0	2.6667
ENSRNOG00000001964	Cd47	Leukocyte surface antigen CD47 [Source:UniProtKB/Swiss-Prot;Acc:P97829]	11	52.0984	52.1582	33.7435	33.8003	0.876784	0.991191	0	0	0.736872	1	1.02906	-0.0482546	0.557611	0	5.16752
ENSRNOG00000001966	Zbtb20	zinc finger and BTB domain-containing protein 20 [Source:RefSeq peptide;Acc:NP_001099350]	11	58.6628	59.3992	39.7907	40.4066	0.791394	1.01384	0	0	0.373462	1	1.13124	0.120692	0.141242	0	1.93289
ENSRNOG00000001971	Bbx	HMG box transcription factor BBX [Source:RefSeq peptide;Acc:NP_001073407]	11	51.6554	51.7991	33.3227	33.4592	0.92002	1.00621	0	0	0.744551	1	1.03817	0.0393476	0.632607	0	2.58371
ENSRNOG00000001974	Gramd1c	GRAM domain-containing protein 1C [Source:RefSeq peptide;Acc:NP_001178755]	11	58.2051	58.2833	39.4079	39.4733	NA	NA	0	0	0.798382	1	1.03073	-0.00787058	0.923847	0	0.864335
ENSRNOG00000001979	Rcan1	Calcipressin-1 [Source:UniProtKB/Swiss-Prot;Acc:Q6IN33]	11	32.3866	32.4803	19.2551	19.317	0.517761	0.98031	0	0	0.766549	1	1.06063	0.0438509	0.594155	0	4.03485
ENSRNOG00000001982	Cblb	E3 ubiquitin-protein ligase CBL-B [Source:RefSeq peptide;Acc:NP_598285]	11	49.6904	49.8568	31.4559	31.6139	0.136925	1.12065	0	0	0.655886	1	1.09552	0.00349171	0.966174	0	2.22365
ENSRNOG00000001989	Alcam	CD166 antigen [Source:UniProtKB/Swiss-Prot;Acc:O35112]	11	49.4242	49.6301	31.203	31.3986	0.063847	1.08356	0	0	0.613751	1	1.02445	-0.0140842	0.864176	0	5.35909
ENSRNOG00000001991	Atp5o	ATP synthase subunit O, mitochondrial [Source:UniProtKB/Swiss-Prot;Acc:Q06647]	11	31.9143	31.9206	18.9435	18.9476	0.0871018	0.960234	0	0	0.819848	1	0.964614	-0.0339855	0.679699	0	6.83005
ENSRNOG00000001992	Atp6v1a	V-type proton ATPase catalytic subunit A [Source:RefSeq peptide;Acc:NP_001101788]	11	58.1273	58.1802	39.3428	39.3871	0.149223	1.02659	0	0	0.771952	1	0.938452	0.067267	0.413423	0	6.64444
ENSRNOG00000001996	Ythdc1	YTH domain-containing protein 1 [Source:RefSeq peptide;Acc:NP_596914]	14	22.8051	22.8353	15.3443	15.3656	0.191748	1.04431	0	0	0.509615	1	1.05112	0.04016	0.625592	0	4.46164
ENSRNOG00000002001	Itsn1	intersectin-1 isoform b [Source:RefSeq peptide;Acc:NP_062100]	11	31.7215	31.902	18.8162	18.9353	0.727889	1.01265	0	0	0.632045	1	1.02569	0.0354967	0.666291	0	4.48194
ENSRNOG00000002004	D4A123_RAT	Uncharacterized protein [Source:UniProtKB/TrEMBL;Acc:D4A123]	14	12.7922	12.8003	8.29821	8.3039	NA	NA	0	0	0.176268	1	1.15843	0.0107169	0.896439	0	2.78923
ENSRNOG00000002010	LOC100360017	mitochondrial ribosomal protein S6 [Source:MGI Symbol;Acc:MGI:2153111]	11	32.0859	32.0979	19.0567	19.0646	0.0679749	1.09294	0	0	0.812435	1	1.06251	-0.0140095	0.864889	0	3.53992
ENSRNOG00000002012	Donson	protein downstream neighbor of Son [Source:RefSeq peptide;Acc:NP_001008288]	11	31.6522	31.6619	18.7705	18.7768	0.357695	1.05668	0	0	0.67331	1	0.931327	-0.0217645	0.791501	0	1.75144
ENSRNOG00000002013	Sidt1	SID1 transmembrane family member 1 precursor [Source:RefSeq peptide;Acc:NP_001094123]	11	57.9817	58.0226	39.2211	39.2553	NA	NA	0	0	0.504094	1	0.919469	-0.13996	0.0875931	0	4.26151
ENSRNOG00000002021	Son	SON DNA-binding protein isoform 1 [Source:RefSeq peptide;Acc:NP_001163798]	11	31.621	31.635	18.7499	18.7591	0.975908	1.00194	0	0	0.763292	1	0.999096	0.0294556	0.720482	0	4.615
ENSRNOG00000002024	Epha5	ephrin type-A receptor 5 isoform 1 precursor [Source:RefSeq peptide;Acc:NP_001162608]	14	25.5242	25.8926	17.2577	17.517	0.661128	0.938092	0	0	0.744248	1	0.981796	0.0159172	0.846704	0	4.0599
ENSRNOG00000002026	Dnajc28	dnaJ homolog subfamily C member 28 [Source:RefSeq peptide;Acc:NP_001014146]	11	31.5845	31.5874	18.7258	18.7277	NA	NA	0	0	0.817402	1	1.01626	0.0132415	0.872231	0	2.31837
ENSRNOG00000002028	Tmem50b	transmembrane protein 50B [Source:RefSeq peptide;Acc:NP_001020185]	11	31.5338	31.5666	18.6923	18.714	0.0656774	1.06145	0	0	0.599007	1	0.958976	-0.00528024	0.948868	0	5.4751
ENSRNOG00000002029			14	0.385072	0.386062	0	0	NA	NA	0	0	0.784676	1	0.950466	-0.29441	0.000255187	0	1.93773
ENSRNOG00000002032	Ifngr2	interferon gamma receptor 2 precursor [Source:RefSeq peptide;Acc:NP_001101783]	11	31.5087	31.527	18.6758	18.6878	0.229726	1.06316	0	0	0.803448	1	1.03813	-0.104047	0.205121	0	3.46699
ENSRNOG00000002035	Paqr3	progestin and adipoQ receptor family member 3 [Source:RefSeq peptide;Acc:NP_001012033]	14	13.9154	13.9328	9.08865	9.10086	NA	NA	0	0	0.843582	1	0.981375	0.0168612	0.837733	0	3.54767
ENSRNOG00000002036	LOC681004	Uncharacterized protein [Source:UniProtKB/TrEMBL;Acc:D4A8C8]	11	31.0022	31.0308	18.3414	18.3603	0.540524	1.03528	0	0	0.859561	1	0.977199	0.149294	0.0682419	0	3.26198
ENSRNOG00000002039	LOC100360066	ecotropic viral integration site 5 [Source:RefSeq peptide;Acc:NP_001258339]	14	2.43492	2.57196	1.00976	1.10619	0.190414	1.19046	0	0	0.939114	1	1.00901	0.137414	0.09357	0	3.4186
ENSRNOG00000002040	Bmp2k	BMP2 inducible kinase [Source:MGI Symbol;Acc:MGI:2155456]	14	13.9376	14.0009	9.1042	9.14875	NA	NA	0	0	0.67347	1	1.05028	-0.164418	0.0443718	0	2.4653
ENSRNOG00000002041	D3ZP61_RAT	Biregional cell adhesion molecule-related/down-regulated by oncogenes (Cdon) binding protein (Predicted), isoform CRA_b; Uncharacterized protein [Source:UniProtKB/TrEMBL;Acc:D4A0Z7]	11	57.6684	57.7437	38.959	39.022	0.377175	0.949932	0	0	0.67397	1	1.0434	-0.0824909	0.31559	0	2.23576
ENSRNOG00000002044	Gtpbp8	GTP-binding protein 8 [Source:UniProtKB/Swiss-Prot;Acc:Q5BK22]	11	57.4846	57.4944	38.8053	38.8135	NA	NA	0	0	0.435735	1	1.13103	1.06671502441486e-05	0.999897	0	2.02739
ENSRNOG00000002045	Anxa3	annexin A3 [Source:RefSeq peptide;Acc:NP_036955]	14	14.2353	14.2971	9.31374	9.35722	0.0982797	0.903649	0	0	0.506108	1	0.94053	-0.0327322	0.690897	0	3.44197
ENSRNOG00000002050	Igfbp7	insulin-like growth factor-binding protein 7 precursor [Source:RefSeq peptide;Acc:NP_001013066]	14	33.0102	33.0701	23.2587	23.3095	0.514575	1.02676	0	0	0.654672	1	1.06813	0.0130975	0.873609	0	4.863
ENSRNOG00000002051	Synj1	Synaptojanin-1 [Source:UniProtKB/Swiss-Prot;Acc:Q62910]	11	30.9218	30.9977	18.2884	18.3385	0.957702	1.00389	0	0	0.735144	1	1.02007	-0.108967	0.184391	0	5.48421
ENSRNOG00000002052	Ccdc80	Coiled-coil domain-containing protein 80 [Source:UniProtKB/Swiss-Prot;Acc:Q6QD51]	11	57.2226	57.2572	38.5861	38.6151	0.294583	0.918831	0	0	0.589778	1	1.14604	0.132468	0.106104	0	1.62996
ENSRNOG00000002053	F1M3H3_RAT	Fraser syndrome 1 homolog (human) [Source:MGI Symbol;Acc:MGI:2385368]	14	14.3097	14.5652	9.3661	9.54587	NA	NA	0	0	0.737324	1	1.07586	0.00972666	0.905962	0	1.51082
ENSRNOG00000002054	Glmn	glomulin, FKBP associated protein [Source:MGI Symbol;Acc:MGI:2141180]	14	2.74485	2.78914	1.22785	1.25902	0.456236	1.03811	0	0	0.773862	1	1.00511	0.184847	0.023542	0	3.32801
ENSRNOG00000002055	RGD1359460	nitric oxide-associated protein 1 [Source:RefSeq peptide;Acc:NP_001006960]	14	33.108	33.124	23.3418	23.3554	0.398634	1.02248	0	0	0.418478	1	1.11312	-0.081417	0.321952	0	3.06377
ENSRNOG00000002057	Slc10a6	Solute carrier family 10 member 6 [Source:UniProtKB/Swiss-Prot;Acc:Q70EX6]	14	7.27069	7.29204	4.41271	4.42773	NA	NA	0	0	0.561501	1	0.798288	0.046603	0.571189	0	0.907814
ENSRNOG00000002061	Ptpn13	tyrosine-protein phosphatase non-receptor type 13 [Source:RefSeq peptide;Acc:NP_001094259]	14	7.29878	7.43346	4.43247	4.52725	NA	NA	0	0	0.692272	1	0.970594	-0.0261896	0.750388	0	1.84673
ENSRNOG00000002069	Slc35a5	probable UDP-sugar transporter protein SLC35A5 [Source:RefSeq peptide;Acc:NP_001178856]	11	57.1908	57.2105	38.5595	38.5761	NA	NA	0	0	0.894698	1	1.01339	0.12399	0.130612	0	3.53568
ENSRNOG00000002070	Mrpl1		14	14.8135	14.8727	9.72064	9.76226	0.88404	0.988168	0	0	0.774047	1	0.998313	0.0453318	0.581745	0	3.0375
ENSRNOG00000002072	RGD1307569	Protein RGD1307569 [Source:UniProtKB/TrEMBL;Acc:D3ZP62]	11	30.8188	30.8916	18.2204	18.2685	NA	NA	0	0	1	1	1.06521	-0.0469461	0.568356	0	0.851434
ENSRNOG00000002073	Brdt	bromodomain, testis-specific [Source:MGI Symbol;Acc:MGI:1891374]	14	2.94963	3.00746	1.37196	1.41266	NA	NA	0	0	0.296828	1	1.20669	0.0867079	0.2914	0	1.01325
ENSRNOG00000002074	Rest	RE1-silencing transcription factor [Source:RefSeq peptide;Acc:NP_113976]	14	33.136	33.1511	23.3656	23.3785	NA	NA	0	0	0.954619	1	1.04124	0.165071	0.0435235	0	1.14574
ENSRNOG00000002075	Cnot6l	CCR4-NOT transcription complex subunit 6-like [Source:RefSeq peptide;Acc:NP_001101825]	14	14.9246	15.012	9.79881	9.86029	0.0615222	1.18169	0	0	0.432171	1	1.10908	-0.0338949	0.680507	0	2.88709
ENSRNOG00000002079	Mapk10	mitogen-activated protein kinase 10 isoform 1 [Source:RefSeq peptide;Acc:NP_001257485]	14	7.71959	8.0105	4.7286	4.93331	0.282522	1.09171	0	0	0.136186	1	1.17964	0.00106494	0.989681	0	6.03265
ENSRNOG00000002080	Urb1	nucleolar pre-ribosomal-associated protein 1 [Source:RefSeq peptide;Acc:NP_001178590]	11	30.7332	30.7935	18.1639	18.2037	NA	NA	0	0	0.574696	1	0.937689	-0.0351127	0.669689	0	1.59844
ENSRNOG00000002089	Ccng2	cyclin-G2 [Source:RefSeq peptide;Acc:NP_001099195]	14	16.3381	16.3466	10.7935	10.7995	0.645109	1.02403	0	0	0.856743	1	0.95484	0.0110209	0.893519	0	3.469
ENSRNOG00000002091	Gtf3c3	general transcription factor 3C polypeptide 3 [Source:RefSeq peptide;Acc:NP_001101709]	9	53.1863	53.2198	40.403	40.4295	NA	NA	0	0	0.567698	1	0.909791	0.0302325	0.713427	0	2.50645
ENSRNOG00000002092	Hunk	hormonally up-regulated neu tumor-associated kinase [Source:RefSeq peptide;Acc:NP_001178591]	11	29.512	29.6261	17.3579	17.4333	NA	NA	0	0	0.99161	1	0.961411	-0.00352905	0.965813	0	1.58626
ENSRNOG00000002093	Tgfbr3	Transforming growth factor beta receptor type 3 [Source:UniProtKB/Swiss-Prot;Acc:P26342]	14	3.05104	3.24029	1.44332	1.5765	NA	NA	0	0	0.968305	1	0.981488	-0.0361207	0.660785	0	2.37329
ENSRNOG00000002094	Atg3	Ubiquitin-like-conjugating enzyme ATG3 [Source:UniProtKB/Swiss-Prot;Acc:Q6AZ50]	11	57.1622	57.1906	38.5357	38.5594	0.00615521	1.12251	0	0	0.202379	1	1.15233	-0.0181235	0.825772	0	4.47384
ENSRNOG00000002095	Arhgap24	Rho GTPase-activating protein 24 [Source:UniProtKB/Swiss-Prot;Acc:Q5U2Z7]	14	8.02614	8.34633	4.94432	5.16964	0.794564	0.971696	0	0	0.472152	1	0.825949	0.0543242	0.50909	0	1.45559
ENSRNOG00000002097	Rasl11b	Ras-like protein family member 11B [Source:UniProtKB/Swiss-Prot;Acc:Q6IMA7]	14	36.393	36.3972	26.134	26.1376	0.510443	0.959783	0	0	0.872597	1	1.01486	-0.160423	0.049872	0	3.74066
ENSRNOG00000002099	Wdfy3	WD repeat and FYVE domain-containing protein 3 [Source:RefSeq peptide;Acc:NP_001164022]	14	8.91641	9.05983	5.57081	5.67173	NA	NA	0	0	0.591179	1	1.06753	-0.0502849	0.541135	0	4.32805
ENSRNOG00000002100	B0BND9_RAT	signal recognition particle 72 kDa protein [Source:RefSeq peptide;Acc:NP_001164072]	14	33.4631	33.4893	23.6437	23.6659	0.0237562	0.797436	0	0	0.685808	1	0.931579	-0.000963599	0.990663	0	4.78207
ENSRNOG00000002101	Paics	Multifunctional protein ADE2 Phosphoribosylaminoimidazole-succinocarboxamide synthase Phosphoribosylaminoimidazole carboxylase [Source:UniProtKB/Swiss-Prot;Acc:P51583]	14	33.4927	33.5094	23.6688	23.683	NA	NA	0	0	0.651834	1	0.903289	0.0737651	0.369666	0	4.57939
ENSRNOG00000002104	SFR15_RAT	splicing factor, arginine/serine-rich 15 [Source:RefSeq peptide;Acc:NP_001032424]	11	29.7519	29.8079	17.5162	17.5532	0.21645	1.08162	0	0	0.42467	1	1.09447	-0.0502938	0.541064	0	2.99731
ENSRNOG00000002105	Cdc7	cell division cycle 7-related protein kinase [Source:RefSeq peptide;Acc:NP_001101822]	14	3.42162	3.44174	1.7041	1.71826	NA	NA	0	0	0.40311	1	0.866573	-0.0318894	0.698463	0	1.53361
ENSRNOG00000002106	Usp46	ubiquitin carboxyl-terminal hydrolase 46 [Source:RefSeq peptide;Acc:NP_001178525]	14	36.5695	36.6064	26.284	26.3155	NA	NA	0	0	0.383191	1	0.875541	-0.0766684	0.351073	0	4.80763
ENSRNOG00000002112	Znf644	zinc finger protein 644 [Source:RefSeq peptide;Acc:NP_001132956]	14	3.64561	3.72069	1.86173	1.91456	0.123912	1.08604	0	0	0.764756	1	0.996463	-0.162388	0.0471003	0	3.32811
ENSRNOG00000002115	Sod1	Superoxide dismutase [Cu-Zn] [Source:UniProtKB/Swiss-Prot;Acc:P07632]	11	29.8108	29.8163	17.5551	17.5588	0.622972	1.01825	0	0	0.975347	1	1.00059	0.0833762	0.310406	0	6.87279
ENSRNOG00000002116	LOC498555	60S acidic ribosomal protein P2 [Source:UniProtKB/Swiss-Prot;Acc:P02401]	1	201.636	201.638	124.844	124.845	NA	NA	0	0	0.488834	1	1.20753	-0.133464	0.10348	0	5.25551
ENSRNOG00000002120	Spata18	Mitochondria-eating protein [Source:UniProtKB/Swiss-Prot;Acc:Q6AYL6]	14	36.9283	36.955	26.589	26.6117	NA	NA	0	0	0.0115402	1	4.75841	0.0989289	0.228416	0	0.66768
ENSRNOG00000002121	Lrrc8d	Leucine-rich repeat-containing protein 8D [Source:UniProtKB/Swiss-Prot;Acc:Q5U308]	14	5.10488	5.12004	2.88862	2.89929	0.498468	1.04761	0	0	0.907697	1	1.05923	0.0326859	0.691311	0	3.41895
ENSRNOG00000002122	Lrrc8c	Leucine-rich repeat-containing protein 8C [Source:UniProtKB/Swiss-Prot;Acc:Q498T9]	14	5.30623	5.39382	3.03031	3.09195	0.809785	1.00942	0	0	0.788865	1	1.00027	-0.215208	0.0081748	0	2.44634
ENSRNOG00000002125	Ccni	cyclin-I [Source:RefSeq peptide;Acc:NP_001099468]	14	16.4373	16.4601	10.8633	10.8794	0.655596	1.01327	0	0	0.780715	1	0.948192	0.083778	0.308072	0	6.12416
ENSRNOG00000002126	Ncam2	neural cell adhesion molecule 2 precursor [Source:RefSeq peptide;Acc:NP_981954]	11	20.6748	20.9109	10.9712	11.1477	0.370428	1.09347	0	0	0.357151	1	1.09268	0.0864679	0.292743	0	4.34531
ENSRNOG00000002128	Ppat	Amidophosphoribosyltransferase [Source:UniProtKB/Swiss-Prot;Acc:P35433]	14	33.5094	33.5437	23.683	23.7122	0.73738	0.985032	0	0	0.558545	1	1.0603	-0.00724122	0.92992	0	3.00753
ENSRNOG00000002129	Lrrc8b	leucine-rich repeat-containing protein 8B [Source:RefSeq peptide;Acc:NP_001100674]	14	5.43178	5.45158	3.11866	3.1326	NA	NA	0	0	0.933009	1	0.986086	-0.00464732	0.95499	0	4.15511
ENSRNOG00000002135	Sgcb	beta-sarcoglycan [Source:RefSeq peptide;Acc:NP_001177997]	14	36.9599	36.9723	26.6159	26.6265	0.0218559	0.917381	0	0	0.722709	1	1.07444	0.00220099	0.978674	0	4.18245
ENSRNOG00000002137	Aasdh		14	33.5532	33.5754	23.7202	23.7391	0.00158214	0.747656	1	0	0.0514959	1	0.74912	-0.0889089	0.279278	0	1.92341
ENSRNOG00000002139	D4A5F4_RAT	RIKEN cDNA C530008M17 gene [Source:MGI Symbol;Acc:MGI:2444817]	14	33.5805	33.6072	23.7434	23.7661	NA	NA	0	0	0.173161	1	1.18517	0.112645	0.169925	0	3.32819
ENSRNOG00000002141	Cd200	OX-2 membrane glycoprotein precursor [Source:RefSeq peptide;Acc:NP_113706]	11	56.9465	56.9742	38.3491	38.3755	0.378296	1.02811	0	0	0.705957	1	1.01843	-0.0579849	0.480923	0	5.48848
ENSRNOG00000002142	Cds1	Phosphatidate cytidylyltransferase 1 [Source:UniProtKB/Swiss-Prot;Acc:O35052]	14	9.07301	9.13533	5.68101	5.72487	0.332872	0.939491	0	0	0.480366	1	0.913954	-0.140072	0.0873373	0	4.55481
ENSRNOG00000002144	Sec3l1	SEC3-like 1 [Source:RefSeq peptide;Acc:NP_001019941]	14	33.8833	33.9209	24.0008	24.0327	0.0580916	1.06153	0	0	0.651277	1	0.976653	0.149833	0.0672409	0	3.92945
ENSRNOG00000002145	Tmprss7	Transmembrane protease serine 7 [Source:UniProtKB/Swiss-Prot;Acc:P86091]	11	56.6175	56.6537	38.0367	38.071	NA	NA	0	0	0.64193	1	1.05973	-0.0632295	0.442076	0	1.00598
ENSRNOG00000002146	Pkd2	polycystin-2 [Source:RefSeq peptide;Acc:NP_001178863]	14	6.3511	6.39299	3.76559	3.79507	NA	NA	0	0	0.972105	1	0.960577	0.0704885	0.391362	0	2.4923
ENSRNOG00000002151	TAGL3_RAT	Transgelin-3 [Source:UniProtKB/Swiss-Prot;Acc:P37805]	11	56.5872	56.6009	38.0078	38.0208	0.902545	1.00488	0	0	0.62193	1	1.0691	0.00953288	0.907827	0	6.57506
ENSRNOG00000002152	Dcun1d4	DCN1-like protein 4 [Source:RefSeq peptide;Acc:NP_001101829]	14	37.0511	37.1289	26.6935	26.7596	0.503429	1.02456	0	0	0.393227	1	1.07882	-0.00443576	0.957037	0	4.42615
ENSRNOG00000002153	Cep135	Protein Cep135 [Source:UniProtKB/TrEMBL;Acc:D3ZI35]	14	33.8012	33.8613	23.931	23.9821	NA	NA	0	0	0.0911256	1	1.47048	0.256717	0.00151837	0	1.08895
ENSRNOG00000002154	Mepe	matrix extracellular phosphoglycoprotein precursor [Source:RefSeq peptide;Acc:NP_077056]	14	6.52936	6.5409	3.89103	3.89915	NA	NA	0	0	0.536074	1	0.77469	-0.0201502	0.80665	0	0.844954
ENSRNOG00000002158	Ibsp	bone sialoprotein 2 precursor [Source:RefSeq peptide;Acc:NP_036719]	14	6.54854	6.56117	3.90453	3.91342	NA	NA	0	0	0.279976	1	0.778545	0.0232171	0.777937	0	0.71745
ENSRNOG00000002159	Agpat9	Glycerol-3-phosphate acyltransferase 3 [Source:UniProtKB/Swiss-Prot;Acc:Q4V8J4]	14	9.99857	10.0502	6.33233	6.36863	NA	NA	0	0	0.905607	1	1.03807	-0.00559492	0.945825	0	1.55018
ENSRNOG00000002163	Klf3	Krueppel-like factor 3 [Source:RefSeq peptide;Acc:NP_001099212]	14	46.2036	46.2261	31.0815	31.0859	0.971749	1.0072	0	0	0.773853	1	0.947651	0.0375413	0.648319	0	2.67861
ENSRNOG00000002165	Fam175a	BRCA1-A complex subunit Abraxas [Source:RefSeq peptide;Acc:NP_001009633]	14	10.0802	10.0945	6.38976	6.39985	NA	NA	0	0	0.64349	1	0.889628	0.0101622	0.901772	0	0.992215
ENSRNOG00000002171	D4A5C1_RAT	pleckstrin homology-like domain, family B, member 2 [Source:MGI Symbol;Acc:MGI:2444981]	11	56.4842	56.5643	37.91	37.9861	NA	NA	0	0	0.563297	1	0.902256	-0.0384889	0.640056	0	1.25449
ENSRNOG00000002175	Clock	circadian locomoter output cycles protein kaput [Source:RefSeq peptide;Acc:NP_068628]	14	34.2185	34.2581	24.2857	24.3193	NA	NA	0	0	0.38573	1	1.16638	-0.11317	0.167932	0	3.15686
ENSRNOG00000002176	Pvrl3	poliovirus receptor-related protein 3 [Source:RefSeq peptide;Acc:NP_001099353]	11	55.8438	55.9406	37.3016	37.3936	0.201504	1.12052	0	0	0.702461	1	0.863042	-0.0577217	0.482919	0	3.06508
ENSRNOG00000002177	Gnpda2	glucosamine-6-phosphate isomerase 2 [Source:RefSeq peptide;Acc:NP_001099475]	14	41.0488	41.0676	29.1006	29.1105	0.438227	1.04691	0	0	0.654713	1	1.06853	-0.00593627	0.942525	0	3.28904
ENSRNOG00000002178	Mrps18c	28S ribosomal protein S18c, mitochondrial [Source:RefSeq peptide;Acc:NP_001099466]	14	10.0962	10.1024	6.40104	6.40541	0.464952	0.963047	0	0	0.262089	1	1.13662	0.0141162	0.86387	0	3.67712
ENSRNOG00000002180	Tbc1d1	Protein Tbc1d1 [Source:UniProtKB/TrEMBL;Acc:D4A4U9]	14	46.5963	46.7818	31.1584	31.1948	0.0984509	0.8894	0	0	0.99145	1	0.973217	-0.0569466	0.488826	0	2.38798
ENSRNOG00000002181	Helq	helicase, POLQ-like [Source:RefSeq peptide;Acc:NP_001014156]	14	10.1026	10.1371	6.40554	6.42981	NA	NA	0	0	0.910213	1	0.934559	-0.00849105	0.917863	0	1.45083
ENSRNOG00000002182	Sept11	Septin-11 [Source:UniProtKB/Swiss-Prot;Acc:B3GNI6]	14	16.4653	16.5491	10.883	10.942	NA	NA	0	0	0.850658	1	0.95221	-0.0382791	0.641882	0	5.28081
ENSRNOG00000002185	B1H277_RAT	phosphoglucomutase-2 [Source:RefSeq peptide;Acc:NP_001099477]	14	46.8272	46.8623	31.2037	31.2105	0.336132	1.06132	0	0	0.908402	1	0.973391	0.0788978	0.337201	0	2.48813
ENSRNOG00000002186	Nudt9	ADP-ribose pyrophosphatase, mitochondrial [Source:UniProtKB/Swiss-Prot;Acc:Q5XIG0]	14	6.80909	6.84066	4.08788	4.1101	0.610902	0.958266	0	0	0.422598	1	1.10197	0.158736	0.0523592	0	4.2371
ENSRNOG00000002188	Hpse	heparanase [Source:MGI Symbol;Acc:MGI:1343124]	14	10.1772	10.1851	6.45801	6.4636	NA	NA	0	0	0.433997	1	1.48492	-0.00926975	0.910361	0	0.665874
ENSRNOG00000002190	RGD1563065	Uncharacterized protein [Source:UniProtKB/TrEMBL;Acc:D3ZY83]	14	47.0221	47.0361	31.2418	31.2446	NA	NA	0	0	0.325331	1	0.841201	-0.091645	0.264689	0	2.32788
ENSRNOG00000002191	LOC498368	RIKEN cDNA 0610040J01 gene [Source:MGI Symbol;Acc:MGI:1923511]	14	47.1559	47.1584	31.268	31.2685	NA	NA	0	0	0.642823	1	0.911098	-0.122263	0.136097	0	1.42184
ENSRNOG00000002192	Rell1	RELT-like protein 1 precursor [Source:RefSeq peptide;Acc:NP_001107248]	14	47.18	47.2296	31.2727	31.2825	NA	NA	0	0	0.809266	1	1.04249	-0.127275	0.120644	0	1.38564
ENSRNOG00000002194	Coq2	4-hydroxybenzoate polyprenyltransferase, mitochondrial precursor [Source:RefSeq peptide;Acc:NP_001037720]	14	10.1896	10.209	6.46673	6.4804	NA	NA	0	0	0.867898	1	1.04399	-0.00558603	0.945911	0	4.07368
ENSRNOG00000002196	LOC100361733	OCIA domain-containing protein 2 [Source:RefSeq peptide;Acc:NP_001258110]	14	37.2787	37.2918	26.8869	26.898	NA	NA	0	0	0.424984	1	0.903883	-0.0608436	0.459524	0	4.06945
ENSRNOG00000002198	LOC685352		14	48.5446	48.5454	31.54	31.5401	NA	NA	0	0	0.680292	1	0.956164	-0.137987	0.0921986	0	4.28478
ENSRNOG00000002199	Tmem165	Transmembrane protein 165 [Source:UniProtKB/Swiss-Prot;Acc:Q4V899]	14	34.2656	34.2908	24.3257	24.3472	0.640301	0.978333	0	0	0.893043	1	1.00147	-0.0492929	0.549155	0	3.30766
ENSRNOG00000002200	LOC100363472		14	10.2331	10.234	6.49737	6.49797	NA	NA	0	0	0.561118	1	1.12234	0.0654234	0.42637	0	1.26222
ENSRNOG00000002201	D3ZLN0_RAT		14	50.4739	50.4748	31.9178	31.918	NA	NA	0	0	0.873698	1	1.04263	0.0592774	0.471182	0	0.584491
ENSRNOG00000002202	Ankrd56	Protein Ankrd56 [Source:UniProtKB/TrEMBL;Acc:D4A4Q1]	14	16.5878	16.5901	10.9692	10.9708	NA	NA	0	0	0.370561	1	1.19715	-0.068876	0.402315	0	1.10166
ENSRNOG00000002203	Lin54		14	10.3981	10.44	6.61346	6.64293	0.0590662	1.12987	0	0	0.458816	1	1.09271	0.00819415	0.920726	0	2.22985
ENSRNOG00000002205	Ociad1	OCIA domain-containing protein 1 [Source:UniProtKB/Swiss-Prot;Acc:Q5XIG4]	14	37.3013	37.3187	26.9061	26.9209	0.125867	1.13433	0	0	0.820872	1	0.995805	-0.102149	0.213554	0	6.93884
ENSRNOG00000002207	Guf1	GTP-binding protein GUF1 homolog [Source:RefSeq peptide;Acc:NP_001100685]	14	41.0668	41.0862	29.1101	29.1203	NA	NA	0	0	0.692813	1	1.03969	0.0569501	0.488798	0	2.23581
ENSRNOG00000002208	Shroom3	protein Shroom3 [Source:RefSeq peptide;Acc:NP_001094359]	14	16.6586	16.7049	11.019	11.0516	0.620159	1.03566	0	0	0.567806	1	1.09485	-0.0157625	0.848175	0	0.823518
ENSRNOG00000002209	D3Z8P4_RAT	arf-GAP with Rho-GAP domain, ANK repeat and PH domain-containing protein 2 [Source:RefSeq peptide;Acc:NP_001100686]	14	50.6094	50.7898	31.9443	31.9797	0.945361	1.00251	0	0	0.728181	1	0.99054	-0.0509072	0.536135	0	3.81115
ENSRNOG00000002210	Hsd17b11	Estradiol 17-beta-dehydrogenase 11 [Source:UniProtKB/Swiss-Prot;Acc:Q6AYS8]	14	6.85957	6.89151	4.1234	4.14588	0.463094	1.0274	0	0	0.878283	1	1.0148	-0.00793636	0.923212	0	3.93239
ENSRNOG00000002211	Rpl12		8	83.1577	83.1585	58.9392	58.9398	NA	NA	0	0	0.531596	1	0.934836	-0.0616881	0.453305	0	2.4677
ENSRNOG00000002212	Hsd17b13	17-beta-hydroxysteroid dehydrogenase 13 [Source:UniProtKB/Swiss-Prot;Acc:Q5M875]	14	6.9012	6.91723	4.15269	4.16398	NA	NA	0	0	0.814217	1	0.965813	0.0658341	0.423465	0	1.23472
ENSRNOG00000002214	Klhl8	kelch-like protein 8 [Source:RefSeq peptide;Acc:NP_001099465]	14	6.95812	7.00363	4.19275	4.22478	0.181444	1.08225	0	0	0.76929	1	0.982977	-0.118989	0.146983	0	3.66446
ENSRNOG00000002215	F1LZ56_RAT	myosin light chain kinase, smooth muscle [Source:RefSeq peptide;Acc:NP_001099344]	11	67.6025	67.8488	47.2676	47.4735	0.0939767	0.934449	0	0	0.135481	1	0.82025	0.0307374	0.708855	0	2.00476
ENSRNOG00000002216	Srd5a3	Probable polyprenol reductase [Source:UniProtKB/Swiss-Prot;Acc:Q5RJM1]	14	34.3184	34.3335	24.3706	24.3834	0.642151	0.96953	0	0	0.910039	1	0.998495	0.0941305	0.251894	0	2.64276
ENSRNOG00000002218	Stbd1	Starch-binding domain-containing protein 1 [Source:UniProtKB/Swiss-Prot;Acc:Q5FVN1]	14	17.0318	17.0352	11.2816	11.284	NA	NA	0	0	0.397657	1	1.27773	0.00909019	0.91209	0	0.599079
ENSRNOG00000002225	Scarb2	Lysosome membrane protein 2 [Source:UniProtKB/Swiss-Prot;Acc:P27615]	14	17.1194	17.1709	11.3433	11.3795	0.271231	0.913679	0	0	0.960594	1	0.979112	-0.0297596	0.717718	0	5.33125
ENSRNOG00000002227	Kit	mast/stem cell growth factor receptor precursor [Source:RefSeq peptide;Acc:NP_071600]	14	34.906	34.9848	24.8701	24.9371	NA	NA	0	0	0.963642	1	0.981028	0.0113214	0.890633	0	2.99529
ENSRNOG00000002229	Adcy5	adenylate cyclase type 5 [Source:RefSeq peptide;Acc:NP_072122]	11	67.291	67.4375	47.007	47.1295	0.0827962	1.12781	0	0	0.91449	1	1.07391	0.0065603	0.936495	0	4.97568
ENSRNOG00000002232	Aff1	AF4/FMR2 family member 1 [Source:RefSeq peptide;Acc:NP_001100676]	14	7.01519	7.11467	4.23291	4.30292	NA	NA	0	0	0.600577	1	1.09895	0.0268528	0.744284	0	1.63779
ENSRNOG00000002238	Sema5b	semaphorin-5B precursor [Source:RefSeq peptide;Acc:NP_001100561]	11	66.9449	67.0708	46.7175	46.8229	NA	NA	0	0	0.61742	1	1.16723	0.0749918	0.361737	0	1.60875
ENSRNOG00000002240	Dirc2	Disrupted in renal carcinoma protein 2 homolog [Source:UniProtKB/Swiss-Prot;Acc:Q66H95]	11	66.8297	66.9102	46.6212	46.6885	0.28618	1.08215	0	0	0.987812	1	0.985927	-0.0689898	0.401536	0	4.1691
ENSRNOG00000002241	Hspbap1	HSPB1-associated protein 1 [Source:UniProtKB/Swiss-Prot;Acc:Q5BKC6]	11	66.7742	66.8288	46.5747	46.6204	NA	NA	0	0	0.822052	1	1.04258	0.0529144	0.520162	0	1.65633
ENSRNOG00000002244	Pdgfra	platelet-derived growth factor receptor alpha precursor [Source:RefSeq peptide;Acc:NP_036934]	14	35.3694	35.4181	25.264	25.3054	0.0469445	0.936032	0	0	0.401318	1	0.893736	0.0900699	0.273023	0	3.14124
ENSRNOG00000002246	Slc30a9	zinc transporter 9 [Source:RefSeq peptide;Acc:NP_001102558]	14	43.4237	43.4771	30.3474	30.3755	0.476698	0.967913	0	0	0.85256	1	0.961639	0.0561483	0.494948	0	5.46083
ENSRNOG00000002247	Nup54	Nuclear pore complex protein Nup54 [Source:UniProtKB/Swiss-Prot;Acc:P70582]	14	17.1788	17.1971	11.3851	11.3979	0.654475	0.967522	0	0	0.823607	1	1.01444	-0.0219726	0.789555	0	2.1146
ENSRNOG00000002248	RGD1311309	Protein RGD1311309 [Source:UniProtKB/TrEMBL;Acc:D3ZNC1]	14	37.453	37.5943	27.0351	27.1552	NA	NA	0	0	0.811306	1	0.969264	0.0123099	0.881152	0	2.93835
ENSRNOG00000002251	Sec31a	Protein transport protein Sec31A [Source:UniProtKB/Swiss-Prot;Acc:Q9Z2Q1]	14	10.4666	10.5227	6.66167	6.70113	0.305583	1.04323	0	0	0.391213	1	1.13583	-0.0602747	0.46374	0	3.54011
ENSRNOG00000002253	Wdr5b	WD repeat-containing protein 5B [Source:UniProtKB/Swiss-Prot;Acc:Q4V8C4]	11	66.5465	66.5475	46.3843	46.3852	NA	NA	0	0	0.403289	1	1.28138	-0.209617	0.0100397	0	1.03646
ENSRNOG00000002254	Tmem33	Transmembrane protein 33 [Source:UniProtKB/Swiss-Prot;Acc:Q9Z142]	14	43.496	43.5169	30.3854	30.3964	0.791461	0.957113	0	0	1	1	0.942077	-0.0711446	0.386958	0	5.14484
ENSRNOG00000002255	Fam162a	Protein FAM162A [Source:UniProtKB/Swiss-Prot;Acc:Q4QQV3]	11	66.5181	66.5463	46.3606	46.3842	NA	NA	0	0	0.948926	1	1.00432	-0.0583973	0.477803	0	4.87293
ENSRNOG00000002256	Art3	ecto-ADP-ribosyltransferase 3 precursor [Source:RefSeq peptide;Acc:NP_001012034]	14	17.1983	17.2806	11.3988	11.4567	0.227962	0.906891	0	0	0.0395887	1	0.709514	0.0658661	0.42324	0	1.38158
ENSRNOG00000002258	Tmem150c	Transmembrane protein 150C [Source:UniProtKB/Swiss-Prot;Acc:B5DFH9]	14	10.8108	10.8276	6.90391	6.91572	0.708415	1.01665	0	0	0.824483	1	0.96661	-0.0129001	0.875498	0	3.94197
ENSRNOG00000002262	Enoph1	Enolase-phosphatase E1 [Source:UniProtKB/Swiss-Prot;Acc:Q5PPH0]	14	10.8336	10.8598	6.91997	6.93841	0.0840808	1.04073	0	0	0.881706	1	0.982271	-0.115515	0.159238	0	4.68897
ENSRNOG00000002267	Chic2	cysteine-rich hydrophobic domain 2 protein [Source:RefSeq peptide;Acc:NP_001099206]	14	35.5228	35.5568	25.3943	25.4233	NA	NA	0	0	0.512628	1	0.906186	-0.136573	0.0956139	0	2.63725
ENSRNOG00000002270	D3ZN89_RAT	Heterogeneous nuclear ribonucleoprotein D-like [Source:UniProtKB/Swiss-Prot;Acc:Q3SWU3]	14	10.8608	10.8643	6.93907	6.94156	NA	NA	0	0	0.696718	1	1.0144	0.0971262	0.237049	0	5.75833
ENSRNOG00000002271	Slain2	SLAIN motif-containing protein 2 [Source:RefSeq peptide;Acc:NP_001100684]	14	37.6397	37.7083	27.1937	27.2521	0.945623	0.996612	0	0	0.606422	1	1.05738	-0.0455896	0.579597	0	2.96633
ENSRNOG00000002272	Lnx1	E3 ubiquitin-protein ligase LNX [Source:RefSeq peptide;Acc:NP_001101828]	14	35.8887	35.9924	25.7054	25.7936	0.0591148	0.912471	0	0	0.555833	1	0.92157	0.0797707	0.331866	0	2.15441
ENSRNOG00000002273	Naaa	N-acylethanolamine-hydrolyzing acid amidase N-acylethanolamine-hydrolyzing acid amidase subunit alpha N-acylethanolamine-hydrolyzing acid amidase subunit beta [Source:UniProtKB/Swiss-Prot;Acc:Q5KTC7]	14	17.3388	17.3583	11.4976	11.5114	NA	NA	0	0	0.675511	1	1.12547	-0.12266	0.134822	0	2.23326
ENSRNOG00000002275	Fip1l1	Pre-mRNA 3'-end-processing factor FIP1 [Source:UniProtKB/Swiss-Prot;Acc:Q5U317]	14	35.9931	36.051	25.7942	25.8433	0.508586	0.975041	0	0	0.912053	1	0.96618	0.00216365	0.979036	0	4.15677
ENSRNOG00000002276	LOC100359714	RCG47045, isoform CRA_d; Uncharacterized protein [Source:UniProtKB/TrEMBL;Acc:D3ZQV8]	X	139.854	139.89	NA	NA	NA	NA	0	0	0.849183	1	0.951625	-0.00331926	0.967844	0	3.00639
ENSRNOG00000002277	NCOR1_RAT	nuclear receptor corepressor 1 [Source:RefSeq peptide;Acc:NP_001258032]	10	48.4815	48.6285	43.4644	43.5582	0.493761	1.089	0	0	0.823394	1	0.945525	-0.0300191	0.715362	0	5.02095
ENSRNOG00000002278	Tec	tyrosine-protein kinase Tec [Source:RefSeq peptide;Acc:NP_445884]	14	37.7565	37.8652	27.293	27.3854	NA	NA	0	0	0.0273824	1	0.681488	0.108896	0.184679	0	1.70009
ENSRNOG00000002280	Sh3bgrl	SH3 domain binding glutamic acid-rich protein like [Source:RefSeq peptide;Acc:NP_001166810]	X	97.4539	97.5598	NA	NA	0.0358151	0.852461	0	0	0.769485	1	1.03934	0.120953	0.140376	0	5.30422
ENSRNOG00000002282	Ppef2	serine/threonine-protein phosphatase with EF-hands 2 [Source:RefSeq peptide;Acc:NP_001100680]	14	17.3593	17.3928	11.5121	11.5357	NA	NA	0	0	0.417675	1	1.23929	-0.0308654	0.707698	0	0.608264
ENSRNOG00000002285	Fam122b	Protein Fam122b [Source:UniProtKB/TrEMBL;Acc:D3ZN42]	X	140.196	140.219	NA	NA	NA	NA	0	0	1	1	0.913844	0.156848	0.0552635	0	1.412
ENSRNOG00000002286	LOC100366025	Protein LOC100362518 [Source:UniProtKB/TrEMBL;Acc:D3ZN80]	10	1.11788	1.12435	0	0	NA	NA	0	0	0.858281	1	0.991605	0.116181	0.156828	0	1.63054
ENSRNOG00000002291	D3Z8C5_RAT	bromodomain and WD repeat domain containing 3 [Source:MGI Symbol;Acc:MGI:3029414]	X	97.0098	97.1313	NA	NA	NA	NA	0	0	0.216546	1	1.18836	-0.000643585	0.993764	0	1.25827
ENSRNOG00000002292	Hnrpd	Heterogeneous nuclear ribonucleoprotein C [Source:UniProtKB/Swiss-Prot;Acc:P17132]	14	10.9177	10.936	6.9791	6.99199	0.457887	0.97623	0	0	0.196602	1	1.08834	0.00426864	0.958654	0	5.90488
ENSRNOG00000002294	Snx29	sorting nexin-29 [Source:RefSeq peptide;Acc:NP_001102996]	10	3.76552	4.11466	0	0.0948559	NA	NA	0	0	0.850125	1	1.01006	0.126889	0.121783	0	1.86377
ENSRNOG00000002296	Nfxl1	nuclear transcription factor, X-box binding-like 1 [Source:RefSeq peptide;Acc:NP_001163909]	14	38.0549	38.0958	27.5288	27.5503	NA	NA	0	0	0.377749	1	1.11397	-0.0274466	0.738831	0	2.42509
ENSRNOG00000002301	Uso1	General vesicular transport factor p115 [Source:UniProtKB/Swiss-Prot;Acc:P41542]	14	17.4144	17.4802	11.5509	11.5972	0.105069	0.929299	0	0	0.608872	1	1.03703	-0.100591	0.220655	0	4.60259
ENSRNOG00000002303	Kcnj12	ATP-sensitive inward rectifier potassium channel 12 [Source:RefSeq peptide;Acc:NP_446433]	10	47.169	47.2152	42.6269	42.6564	NA	NA	0	0	0.739648	1	1.0163	-0.0611708	0.457109	0	2.39939
ENSRNOG00000002305	Slc15a2	Solute carrier family 15 member 2 [Source:UniProtKB/Swiss-Prot;Acc:Q63424]	11	65.8195	65.8499	45.7763	45.8018	0.588065	1.02119	0	0	0.8551	1	0.934366	-0.0117908	0.886129	0	3.62091
ENSRNOG00000002312	Atp10d		14	38.3439	38.4337	27.6806	27.7277	NA	NA	0	0	0.644363	1	0.919968	-0.0704227	0.391806	0	0.811857
ENSRNOG00000002314	Lkap	Meiosis arrest female protein 1 [Source:UniProtKB/Swiss-Prot;Acc:Q8VIG2]	10	0.826803	0.872216	0	0	NA	NA	0	0	0.547463	1	1.04352	-0.194672	0.0169784	0	5.20713
ENSRNOG00000002317	F1LWE8_RAT	NA	10	4.11795	4.16882	0.097576	0.139661	NA	NA	0	0	1	1	1.07676	0.110028	0.180127	0	1.75899
ENSRNOG00000002318	D3ZMM9_RAT	LIM and calponin homology domains-containing protein 1 [Source:RefSeq peptide;Acc:NP_001178607]	14	43.725	43.8226	30.5056	30.5568	0.275485	1.11696	0	0	0.868472	1	1.03024	-0.0110405	0.893331	0	4.14113
ENSRNOG00000002319	Tsn	translin [Source:MGI Symbol;Acc:MGI:109263]	13	30.9174	30.9284	1.00664	1.01239	0.42729	1.0639	0	0	0.662633	1	0.923593	-0.0418259	0.611315	0	3.67707
ENSRNOG00000002320	Commd8	COMM domain-containing protein 8 [Source:RefSeq peptide;Acc:NP_001099474]	14	38.4989	38.5095	27.7619	27.7675	NA	NA	0	0	0.33417	1	1.13543	0.0174532	0.832118	0	4.00656
ENSRNOG00000002321	RGD1563242		X	96.6289	96.6294	NA	NA	NA	NA	0	0	0.513999	1	1.09011	-0.0163599	0.842495	0	3.02831
ENSRNOG00000002322	RGD1310587	Uncharacterized protein C1orf115 homolog [Source:UniProtKB/Swiss-Prot;Acc:Q3ZCQ0]	13	100.876	100.886	52.8907	52.8977	0.344492	0.94053	0	0	0.59182	1	0.920445	0.15208	0.0631932	0	2.10161
ENSRNOG00000002323	RGD1566265	uncharacterized protein LOC363487 [Source:RefSeq peptide;Acc:NP_001128061]	X	96.0122	96.0532	NA	NA	0.131115	1.10995	0	0	0.508593	1	1.09348	-0.0965466	0.239872	0	3.34344
ENSRNOG00000002327	Gabrb1	Gamma-aminobutyric acid receptor subunit beta-1 [Source:UniProtKB/Swiss-Prot;Acc:P15431]	14	38.5303	39.0056	27.7784	28.0279	0.0278396	1.20042	0	0	0.186304	1	1.1384	0.076327	0.353228	0	3.20581
ENSRNOG00000002332	MSPD1_RAT	Motile sperm domain-containing protein 1 [Source:UniProtKB/Swiss-Prot;Acc:Q5RJS6]	X	140.303	140.33	NA	NA	NA	NA	0	0	0.571689	1	1.05013	0.0293933	0.721048	0	1.78831
ENSRNOG00000002335	Gspt1	eukaryotic peptide chain release factor GTP-binding subunit ERF3A [Source:RefSeq peptide;Acc:NP_001003978]	10	4.2492	4.28383	0.206153	0.234806	0.111368	0.959228	0	0	0.287729	1	1.09093	-0.203364	0.0125605	0	4.72368
ENSRNOG00000002336	D3ZMK4_RAT	Gamma-aminobutyric acid receptor subunit alpha-4 [Source:UniProtKB/Swiss-Prot;Acc:P28471]	14	39.0475	39.1225	28.0499	28.0893	0.0919343	0.905022	0	0	0.876387	1	0.949325	-0.179407	0.0280379	0	4.75925
ENSRNOG00000002338	F1MAC7_RAT	diacylglycerol kinase, epsilon [Source:MGI Symbol;Acc:MGI:1889276]	10	77.5134	77.5349	64.5723	64.5886	0.92774	0.997603	0	0	0.990153	1	0.982628	-0.0814561	0.321719	0	3.34535
ENSRNOG00000002339	Mark1	Serine/threonine-protein kinase MARK1 [Source:UniProtKB/Swiss-Prot;Acc:O08678]	13	100.905	101.009	52.9119	52.9866	0.0942367	1.09395	0	0	0.469181	1	0.91261	-0.152928	0.0617185	0	4.08033
ENSRNOG00000002341	Trim25	E3 ubiquitin/ISG15 ligase TRIM25 [Source:RefSeq peptide;Acc:NP_001009536]	10	77.4598	77.4879	64.5313	64.5528	NA	NA	0	0	0.625805	1	0.837334	0.0191155	0.816399	0	1.04505
ENSRNOG00000002342	Aldh3a2	fatty aldehyde dehydrogenase [Source:RefSeq peptide;Acc:NP_113919]	10	47.4005	47.4211	42.7746	42.7877	0.177973	0.961777	0	0	0.891229	1	0.995247	0.0220614	0.788723	0	4.02861
ENSRNOG00000002343	Uchl1	Ubiquitin carboxyl-terminal hydrolase isozyme L1 [Source:UniProtKB/Swiss-Prot;Acc:Q00981]	14	44.1144	44.1249	30.6724	30.6745	0.820043	1.00786	0	0	0.908773	1	1.01476	0.0584186	0.477642	0	8.68286
ENSRNOG00000002345	LOC100361238		14	11.6592	11.693	7.50094	7.52471	NA	NA	0	0	0.461093	1	1.07524	-0.0575084	0.484541	0	3.49246
ENSRNOG00000002347	Rgl1	ral guanine nucleotide dissociation stimulator-like 1 [Source:RefSeq peptide;Acc:NP_001099427]	13	67.4682	67.7549	29.5171	29.7236	0.129517	1.08816	0	0	0.971428	1	0.991355	-0.00722699	0.930057	0	3.98556
ENSRNOG00000002349	Gabra2	gamma-aminobutyric acid receptor subunit alpha-2 precursor [Source:RefSeq peptide;Acc:NP_001129251]	14	39.5687	39.7051	28.3236	28.3952	NA	NA	0	0	1	1	0.960739	-0.095679	0.244142	0	4.94392
ENSRNOG00000002352	Tsen15	tRNA-splicing endonuclease subunit Sen15 [Source:RefSeq peptide;Acc:NP_001099428]	13	67.3208	67.3362	29.411	29.4221	0.245823	0.939313	0	0	0.987851	1	0.983961	-0.134461	0.100904	0	2.88539
ENSRNOG00000002353	RBGPR_RAT	rab3 GTPase-activating protein non-catalytic subunit [Source:RefSeq peptide;Acc:NP_001035244]	13	101.214	101.289	53.1344	53.1884	0.791325	0.97626	0	0	0.525652	1	0.918237	-0.107777	0.189256	0	3.7213
ENSRNOG00000002355	Slc47a1	Multidrug and toxin extrusion protein 1 [Source:UniProtKB/Swiss-Prot;Acc:Q5I0E9]	10	47.5141	47.5484	42.8471	42.869	NA	NA	0	0	0.342263	1	0.841454	0.00820304	0.92064	0	1.26117
ENSRNOG00000002358	Scpep1	Retinoid-inducible serine carboxypeptidase [Source:UniProtKB/Swiss-Prot;Acc:Q920A6]	10	77.3475	77.3779	64.4455	64.4687	0.234038	0.941211	0	0	0.229902	1	0.889392	-0.112195	0.171647	0	3.5082
ENSRNOG00000002360	Gabrg1	Gamma-aminobutyric acid receptor subunit gamma-1 [Source:UniProtKB/Swiss-Prot;Acc:P23574]	14	39.8782	39.9514	28.486	28.5245	0.961598	1.00114	0	0	0.881415	1	0.987961	0.0527562	0.521412	0	4.23874
ENSRNOG00000002361	Prkg2	cGMP-dependent protein kinase 2 [Source:UniProtKB/Swiss-Prot;Acc:Q64595]	14	11.8895	12.0055	7.663	7.74464	0.529888	1.04512	0	0	0.29987	1	0.833489	-0.216584	0.0077658	0	2.3355
ENSRNOG00000002364	Rnf112	RING finger protein 112 [Source:UniProtKB/Swiss-Prot;Acc:O70418]	10	47.6	47.6055	42.9019	42.9054	0.986397	1.00146	0	0	0.561788	1	1.06176	-0.0530744	0.518899	0	5.18765
ENSRNOG00000002365	Itm2a	integral membrane protein 2A [Source:RefSeq peptide;Acc:NP_001020883]	X	95.6379	95.6438	NA	NA	NA	NA	0	0	0.871832	1	0.958054	-0.00327304	0.968292	0	4.34733
ENSRNOG00000002368	D4A8P9_RAT		13	101.29	101.337	53.1885	53.2229	0.0889523	0.900895	0	0	0.606005	1	0.961013	-0.00043202	0.995814	0	3.57533
ENSRNOG00000002369	Rgs8	Regulator of G-protein signaling 8 [Source:UniProtKB/Swiss-Prot;Acc:P49804]	13	68.7358	68.767	30.4641	30.488	0.244617	0.894987	0	0	0.862512	1	1.04717	-0.180543	0.0270429	0	4.3117
ENSRNOG00000002373	Akap1	A-kinase anchor protein 1, mitochondrial [Source:RefSeq peptide;Acc:NP_446117]	10	77.2617	77.2816	64.3799	64.3951	NA	NA	0	0	0.906736	1	1.04868	-0.000992045	0.990387	0	3.41509
ENSRNOG00000002376	F1LNR1_RAT	Clasp1 protein [Source:UniProtKB/TrEMBL;Acc:Q5M928]	13	31.0824	31.2668	1.09327	1.19009	NA	NA	0	0	0.773662	1	1.03736	0.0160469	0.845469	0	3.65098
ENSRNOG00000002378	Bpnt1	3'(2'),5'-bisphosphate nucleotidase 1 [Source:UniProtKB/Swiss-Prot;Acc:Q9Z1N4]	13	101.351	101.368	53.2328	53.2446	0.3537	1.04499	0	0	0.957885	1	1.00374	-0.0674484	0.412162	0	4.20781
ENSRNOG00000002381	Bmp3	bone morphogenetic protein 3 precursor [Source:RefSeq peptide;Acc:NP_058801]	14	12.0656	12.0903	7.78693	7.80428	0.124094	0.67797	0	0	0.450751	1	0.820432	-0.0716726	0.383435	0	1.60983
ENSRNOG00000002382	Mfap4	microfibril-associated glycoprotein 4 precursor [Source:RefSeq peptide;Acc:NP_001029296]	10	47.6462	47.6491	42.9314	42.9332	NA	NA	0	0	0.360809	1	0.881391	0.0981929	0.231914	0	1.59755
ENSRNOG00000002385	Prg4	proteoglycan 4 precursor [Source:RefSeq peptide;Acc:NP_001099432]	13	64.7533	64.7695	27.5624	27.5741	NA	NA	0	0	0.896922	1	0.933669	-0.0768195	0.350121	0	0.882678
ENSRNOG00000002387	Tceal1	Transcription elongation factor A protein-like 1 [Source:UniProtKB/Swiss-Prot;Acc:Q5PPP3]	X	124.359	124.361	NA	NA	0.541388	1.0362	0	0	0.852154	1	0.916214	-0.0295391	0.719722	0	4.35671
ENSRNOG00000002388	Trim41	tripartite motif-containing 41 [Source:RefSeq peptide;Acc:NP_001128209]	10	34.073	34.0841	33.2069	33.2201	0.464393	1.0252	0	0	0.576986	1	1.08182	0.153666	0.0604585	0	3.49107
ENSRNOG00000002389	Morf4l2	Mortality factor 4-like protein 2 [Source:UniProtKB/Swiss-Prot;Acc:Q6QI89]	X	124.383	124.394	NA	NA	0.381843	1.01736	0	0	1	1	0.948414	-0.0258181	0.753815	0	6.56288
ENSRNOG00000002390	Gnb2l1	Guanine nucleotide-binding protein subunit beta-2-like 1 [Source:UniProtKB/Swiss-Prot;Acc:P63245]	10	34.0672	34.0726	33.2	33.2064	NA	NA	0	0	0.284282	1	0.897875	0.00217077	0.978967	0	6.40399
ENSRNOG00000002393	Eprs	bifunctional aminoacyl-tRNA synthetase [Source:RefSeq peptide;Acc:NP_001019409]	13	101.376	101.448	53.2505	53.3027	0.890392	0.992196	0	0	0.830038	1	0.963435	0.0527562	0.521412	0	3.97895
ENSRNOG00000002394	Tpr	translocated promoter region [Source:RefSeq peptide;Acc:NP_001100655]	13	64.6886	64.7534	27.5158	27.5625	0.350084	1.07251	0	0	0.989286	1	0.982644	0.0243478	0.767423	0	3.52913
ENSRNOG00000002397	Slc30a10	zinc transporter 10 [Source:RefSeq peptide;Acc:NP_001099455]	13	101.475	101.492	53.3219	53.3344	NA	NA	0	0	0.667779	1	0.995866	0.0590516	0.472876	0	2.50683
ENSRNOG00000002403	Fam129a	Protein Niban [Source:UniProtKB/Swiss-Prot;Acc:Q9ESN0]	13	66.4671	66.6201	28.7963	28.9065	NA	NA	0	0	0.0401199	1	0.592254	0.0119045	0.885038	0	0.723826
ENSRNOG00000002407	Pdxdc1		10	1.54354	1.63779	0	0	NA	NA	0	0	0.851576	1	1.01992	0.0687178	0.4034	0	2.57102
ENSRNOG00000002412	Mapk7	mitogen-activated protein kinase 7 [Source:RefSeq peptide;Acc:NP_001178476]	10	47.6492	47.6543	42.9333	42.9366	NA	NA	0	0	0.888504	1	1.03751	-0.154437	0.0591635	0	1.88989
ENSRNOG00000002413	Gpc4	glypican-4 precursor [Source:RefSeq peptide;Acc:NP_001014130]	X	138.967	139.077	NA	NA	0.874196	0.98631	0	0	0.221384	1	0.849778	0.189957	0.0198979	0	2.65051
ENSRNOG00000002414	Tfcp2l1	transcription factor CP2-like protein 1 [Source:RefSeq peptide;Acc:NP_001100640]	13	31.2882	31.342	1.20132	1.22953	NA	NA	0	0	0.669876	1	1.18272	0.0864057	0.293091	0	0.814212
ENSRNOG00000002415	F1LYR3_RAT	ankyrin-repeat and fibronectin type III domain containing 1 [Source:MGI Symbol;Acc:MGI:2686021]	10	77.8152	77.9552	64.8028	64.9098	NA	NA	0	0	0.460279	1	0.77334	0.0377013	0.64692	0	0.818076
ENSRNOG00000002418	Tgfb2	transforming growth factor beta-2 precursor [Source:RefSeq peptide;Acc:NP_112393]	13	102.719	102.819	53.7	53.7	0.375249	0.95265	0	0	0.222273	1	0.838082	-0.0753172	0.359652	0	3.33341
ENSRNOG00000002419	Plp1	Myelin proteolipid protein [Source:UniProtKB/Swiss-Prot;Acc:P60203]	X	124.489	124.504	NA	NA	0.0110936	1.05151	0	0	0.447699	1	1.3539	0.058104	0.480021	0	9.43916
ENSRNOG00000002420	D3ZP12_RAT	zinc finger CCCH domain-containing protein 7A [Source:RefSeq peptide;Acc:NP_001101732]	10	4.36136	4.40082	0.29894	0.331589	0.853498	0.991383	0	0	0.824094	1	1.02444	0.00398596	0.96139	0	2.94767
ENSRNOG00000002422	F1LMJ6_RAT	NA	10	42.6134	42.6725	39.72	39.7577	NA	NA	0	0	0.430658	1	0.862617	-0.0321081	0.696497	0	4.04808
ENSRNOG00000002423	Fam114a2	family with sequence similarity 114, member A2 [Source:MGI Symbol;Acc:MGI:1917629]	10	43.0926	43.1062	40.0258	40.0345	NA	NA	0	0	0.923412	1	0.972167	-0.00623673	0.939621	0	2.71692
ENSRNOG00000002433	G3bp2	ras GTPase-activating protein-binding protein 2 [Source:RefSeq peptide;Acc:NP_001014011]	14	17.557	17.5883	11.6512	11.6732	NA	NA	0	0	0.892758	1	0.996636	0.0242535	0.768298	0	5.51752
ENSRNOG00000002434	Tmem100	Transmembrane protein 100 [Source:UniProtKB/Swiss-Prot;Acc:Q569C0]	10	78.4462	78.4521	65.2849	65.2894	0.334052	0.880571	0	0	0.654271	1	0.885567	-0.0305916	0.710174	0	3.28518
ENSRNOG00000002436	Mmd	Monocyte to macrophage differentiation protein [Source:UniProtKB/Swiss-Prot;Acc:Q719N3]	10	78.6641	78.6924	65.4514	65.473	0.187647	1.04778	0	0	0.659985	1	0.909603	-0.233463	0.00403708	0	6.11662
ENSRNOG00000002437	Rab9b	NA	X	124.528	124.528	NA	NA	NA	NA	0	0	0.509565	1	1.13142	-0.0313472	0.703348	0	3.27783
ENSRNOG00000002439	Inhbb	NA	13	32.1729	32.1767	1.66576	1.66776	NA	NA	0	0	0.173725	1	1.66512	0.0297027	0.718235	0	0.764875
ENSRNOG00000002440	Ralb	ras-related protein Ral-B precursor [Source:RefSeq peptide;Acc:NP_446273]	13	32.2296	32.239	1.69556	1.7005	0.600072	1.03101	0	0	0.916189	1	0.975543	-0.168646	0.0391123	0	3.10766
ENSRNOG00000002443	Mfap3	Microfibril-associated glycoprotein 3 [Source:UniProtKB/Swiss-Prot;Acc:Q6AYF7]	10	43.1063	43.1188	40.0345	40.0425	0.747909	0.963353	0	0	0.703868	1	0.956873	0.0543847	0.508618	0	2.44364
ENSRNOG00000002449	Maged2	melanoma-associated antigen D2 [Source:RefSeq peptide;Acc:NP_001258038]	X	40.0563	40.0645	NA	NA	0.940111	0.996844	0	0	0.802376	1	0.964836	-0.0493249	0.548896	0	3.20931
ENSRNOG00000002450	Rrp15	RRP15-like protein [Source:UniProtKB/Swiss-Prot;Acc:Q5M947]	13	102.834	102.857	53.7	53.7	0.0495523	0.901017	0	0	0.714738	1	0.903284	0.0666146	0.417978	0	2.9959
ENSRNOG00000002452	E9PSP7_RAT	thioredoxin domain-containing protein 11 [Source:RefSeq peptide;Acc:NP_001121004]	10	4.40443	4.48599	0.334576	0.402045	NA	NA	0	0	0.491379	1	0.912309	-0.0409316	0.618961	0	2.64951
ENSRNOG00000002453	Taf9b	Transcription initiation factor TFIID subunit 9B [Source:UniProtKB/Swiss-Prot;Acc:Q62880]	X	94.3421	94.352	NA	NA	0.770981	1.03162	0	0	0.557968	1	1.06329	0.0122032	0.882174	0	4.49136
ENSRNOG00000002454	Rnf2	E3 ubiquitin-protein ligase RING2 [Source:UniProtKB/Swiss-Prot;Acc:Q4KLY4]	13	66.3457	66.3738	28.7089	28.7292	NA	NA	0	0	0.568609	1	0.916995	0.0656403	0.424834	0	3.44774
ENSRNOG00000002456	LOC690286	hepatic leukemia factor [Source:MGI Symbol;Acc:MGI:96108]	10	78.75	78.755	65.517	65.5208	NA	NA	0	0	0.271017	1	1.09105	-0.165448	0.0430397	0	4.73839
ENSRNOG00000002458	Cox11	cytochrome c oxidase assembly homolog 11 [Source:RefSeq peptide;Acc:NP_001103045]	10	79.0397	79.0463	65.7383	65.7434	0.0464646	0.85594	0	0	0.475234	1	0.868078	0.139571	0.0884869	0	2.97314
ENSRNOG00000002461	Nid1	Nidogen-1 [Source:UniProtKB/Swiss-Prot;Acc:P08460]	17	66.8579	66.9303	40.3967	40.4493	NA	NA	0	0	0.0538889	1	0.746633	0.248249	0.00219068	0	1.59375
ENSRNOG00000002462	B9D1_RAT	B9 domain-containing protein 1 [Source:UniProtKB/Swiss-Prot;Acc:P0C5J2]	10	47.6657	47.6732	42.9438	42.9486	0.322201	0.965231	0	0	0.694775	1	0.997833	0.194391	0.0171413	0	3.10682
ENSRNOG00000002463	LOC682752	Stannin [Source:UniProtKB/Swiss-Prot;Acc:P61808]	10	4.48838	4.49473	0.40402	0.409275	NA	NA	0	0	1	1	1.01954	-0.0709934	0.38797	0	5.0632
ENSRNOG00000002467	Pgk1	Phosphoglycerate kinase 1 [Source:UniProtKB/Swiss-Prot;Acc:P16617]	X	94.3241	94.3402	NA	NA	0.779314	0.993152	0	0	0.948903	1	1.0088	-0.054598	0.506954	0	7.18184
ENSRNOG00000002468	Tnr	tenascin R [Source:MGI Symbol;Acc:MGI:99516]	13	75.2711	75.3472	34.9568	35.0059	0.253804	0.891492	0	0	0.507658	1	1.05814	0.0013085	0.987321	0	3.71105
ENSRNOG00000002469	Trim7	Protein Trim7 [Source:UniProtKB/TrEMBL;Acc:D3ZNJ9]	10	34.1045	34.1179	33.2444	33.2603	NA	NA	0	0	0.513822	1	1.08966	-0.084114	0.306129	0	1.33301
ENSRNOG00000002470	Ifi47	interferon gamma inducible protein 47 [Source:RefSeq peptide;Acc:NP_742016]	10	34.1976	34.2051	33.3552	33.3641	NA	NA	0	0	0.568185	1	0.960038	-0.048484	0.555738	0	0.686594
ENSRNOG00000002473	RGD1307830	Protein RGD1307830 [Source:UniProtKB/TrEMBL;Acc:D3ZN01]	13	64.6604	64.6863	27.4955	27.5142	NA	NA	0	0	0.576048	1	1.05318	-0.0327606	0.690642	0	2.92631
ENSRNOG00000002474	RGD1562626	TOM1-like protein 1 [Source:UniProtKB/Swiss-Prot;Acc:F1LM81]	10	79.0457	79.09	65.743	65.7768	0.0485644	0.821522	0	0	0.788126	1	1.0501	-0.0648225	0.430639	0	2.43165
ENSRNOG00000002475	RGD1565798		7	136.156	136.156	103.038	103.038	NA	NA	0	0	0.491111	1	0.835639	-0.092678	0.259319	0	2.84221
ENSRNOG00000002478	Insig2	Insulin-induced gene 2 protein [Source:UniProtKB/Swiss-Prot;Acc:Q80UA9]	13	33.3304	33.3527	2.27619	2.2881	0.976428	1.00014	0	0	0.330291	1	0.878282	0.0604507	0.462433	0	3.50897
ENSRNOG00000002480	Gpr137b	integral membrane protein GPR137B [Source:RefSeq peptide;Acc:NP_001099448]	17	66.9737	67.0058	40.4809	40.5042	0.491547	0.962607	0	0	0.817079	1	1.07889	-0.0756212	0.35771	0	2.62147
ENSRNOG00000002488	Galnt10	Polypeptide N-acetylgalactosaminyltransferase 10 [Source:UniProtKB/Swiss-Prot;Acc:Q925R7]	10	43.2374	43.3816	40.1182	40.2102	NA	NA	0	0	0.484826	1	0.944185	-0.00280902	0.972785	0	1.85023
ENSRNOG00000002491	Rhoa		X	40.0435	40.0441	NA	NA	NA	NA	0	0	0.842335	1	0.965791	0.0428002	0.603031	0	3.38912
ENSRNOG00000002496	Stxbp5l	syntaxin-binding protein 5-like [Source:RefSeq peptide;Acc:NP_001258179]	11	65.1296	65.4551	45.1993	45.4716	NA	NA	0	0	0.664644	1	0.997361	-0.00972133	0.906014	0	3.4842
ENSRNOG00000002499	F1M1N2_RAT	NA	10	34.6767	34.6795	33.9253	33.9286	NA	NA	0	0	1	1	0.912047	0.0752621	0.360005	0	2.32258
ENSRNOG00000002504	Spata17	Protein Spata17 [Source:UniProtKB/TrEMBL;Acc:F1M574]	13	103.234	103.318	53.7	53.7	NA	NA	0	0	0.0669032	1	0.235802	0.234286	0.00390571	0	0.595775
ENSRNOG00000002506	CDKL2_RAT	Cyclin-dependent kinase-like 2 [Source:UniProtKB/Swiss-Prot;Acc:Q5XIT0]	14	17.5989	17.6316	11.6807	11.7037	NA	NA	0	0	0.462467	1	0.866277	-0.139594	0.0884336	0	4.06005
ENSRNOG00000002509	Gnl3l	guanine nucleotide-binding protein-like 3-like protein [Source:RefSeq peptide;Acc:NP_001075427]	X	40.3012	40.3344	NA	NA	NA	NA	0	0	0.601265	1	0.944866	0.0820073	0.318445	0	4.69875
ENSRNOG00000002512	Gpatc2	G patch domain containing 2 [Source:RefSeq peptide;Acc:NP_001011909]	13	103.354	103.491	53.7	53.7	NA	NA	0	0	0.135292	1	1.30157	0.00983156	0.904953	0	2.11754
ENSRNOG00000002514	Ccdc93	Coiled-coil domain-containing protein 93 [Source:UniProtKB/Swiss-Prot;Acc:Q5BJT7]	13	33.4658	33.5342	2.34845	2.38491	NA	NA	0	0	0.626195	1	0.870522	0.00476999	0.953803	0	2.36385
ENSRNOG00000002515	ATP7A_RAT	Copper-transporting ATPase 1 [Source:UniProtKB/Swiss-Prot;Acc:P70705]	X	94.1925	94.2496	NA	NA	NA	NA	0	0	0.55481	1	1.13525	-0.0213592	0.795298	0	1.06937
ENSRNOG00000002516	Mtm1	Myotubularin [Source:UniProtKB/Swiss-Prot;Acc:Q6AXQ4]	7	0.24796	0.265278	0	0	NA	NA	0	0	0.791981	1	0.979831	0.044578	0.588046	0	3.52797
ENSRNOG00000002519	Magt1	magnesium transporter protein 1 precursor [Source:RefSeq peptide;Acc:NP_446398]	X	94.0955	94.1337	NA	NA	0.12439	0.903578	0	0	0.867859	1	0.93895	-0.15355	0.0606545	0	2.43878
ENSRNOG00000002520	Litaf	Lipopolysaccharide-induced tumor necrosis factor-alpha factor homolog [Source:UniProtKB/Swiss-Prot;Acc:P0C0T0]	10	4.58749	4.6239	0.486012	0.516138	0.265853	0.939715	0	0	0.955392	1	1.05284	-0.110186	0.179498	0	3.55701
ENSRNOG00000002523	EPN2_RAT	epsin-2 isoform a [Source:RefSeq peptide;Acc:NP_068624]	10	47.6775	47.7392	42.9514	42.9907	0.118355	0.982706	0	0	0.449397	1	1.1137	0.142911	0.0810503	0	4.85728
ENSRNOG00000002524	Gpr37	Probable G-protein coupled receptor 37 [Source:UniProtKB/Swiss-Prot;Acc:Q9QYC6]	4	52.1669	52.1891	36.1835	36.1945	0.887183	1.00326	0	0	0.730614	1	1.08942	-0.0205929	0.802489	0	4.79393
ENSRNOG00000002525	Ptgs2	Prostaglandin G/H synthase 2 [Source:UniProtKB/Swiss-Prot;Acc:P35355]	13	64.4273	64.434	27.3276	27.3325	NA	NA	0	0	0.601903	1	1.01167	-0.206601	0.0111935	0	3.0276
ENSRNOG00000002526		NA	X	40.343	40.3436	NA	NA	NA	NA	0	0	0.422448	1	0.825137	0.0426597	0.604222	0	1.1014
ENSRNOG00000002529	LOC302495	RAP2C, member of RAS oncogene family [Source:RefSeq peptide;Acc:NP_001100420]	X	137.743	137.756	NA	NA	0.778547	1.01221	0	0	0.80073	1	0.984746	-0.147102	0.0724412	0	3.95007
ENSRNOG00000002536	C1galt1c1	C1GALT1-specific chaperone 1 [Source:UniProtKB/Swiss-Prot;Acc:Q499P3]	X	6.74467	6.74911	NA	NA	0.237371	1.07853	0	0	0.824514	1	0.997435	-0.124351	0.129487	0	3.85747
ENSRNOG00000002537	D4A7Z8_RAT	serine/threonine-protein kinase WNK3 [Source:RefSeq peptide;Acc:NP_001157079]	X	40.532	40.6356	NA	NA	NA	NA	0	0	0.579492	1	1.03833	0.0354292	0.666889	0	1.67907
ENSRNOG00000002538	Epb4.1l5	Band 4.1-like protein 5 [Source:UniProtKB/Swiss-Prot;Acc:Q5FVG2]	13	32.3309	32.4267	1.74874	1.79904	NA	NA	0	0	0.853808	1	1.00863	-0.010436	0.899139	0	1.91951
ENSRNOG00000002541	Pds5a	Sister chromatid cohesion protein PDS5 homolog A [Source:UniProtKB/Swiss-Prot;Acc:A4L9P7]	14	45.2429	45.3399	30.8934	30.9124	NA	NA	0	0	0.771911	1	1.02242	-0.133206	0.104155	0	3.1801
ENSRNOG00000002542	Heatr6	HEAT repeat-containing protein 6 [Source:UniProtKB/Swiss-Prot;Acc:A1EC95]	10	71.977	72.0056	60.3424	60.3642	NA	NA	0	0	0.396858	1	0.850668	0.017503	0.831647	0	1.43392
ENSRNOG00000002543	Thap6	THAP domain containing 6 [Source:RefSeq peptide;Acc:NP_001100679]	14	17.6729	17.6841	11.7328	11.7407	NA	NA	0	0	0.670377	1	1.17814	-0.12781	0.119078	0	1.49509
ENSRNOG00000002544	Kifap3	kinesin-associated protein 3 [Source:RefSeq peptide;Acc:NP_001099434]	13	79.544	79.6738	37.7148	37.7985	0.0186432	0.949174	0	0	0.715923	1	0.916809	-0.00313081	0.969669	0	6.09595
ENSRNOG00000002545	RGD1309748	uncharacterized protein LOC302913 [Source:RefSeq peptide;Acc:NP_001100442]	10	6.78118	6.81012	2.3008	2.32474	0.790632	1.00806	0	0	0.770846	1	0.983979	-0.171791	0.0355487	0	4.19767
ENSRNOG00000002546	Rchy1	RING finger and CHY zinc finger domain-containing protein 1 [Source:RefSeq peptide;Acc:NP_001007619]	14	17.6834	17.699	11.7402	11.7511	0.237834	0.962908	0	0	0.5093	1	0.909633	-0.0538211	0.513027	0	3.7427
ENSRNOG00000002549	Htr5b	5-hydroxytryptamine receptor 5B [Source:UniProtKB/Swiss-Prot;Acc:P35365]	13	33.5453	33.5581	2.39081	2.39763	NA	NA	0	0	0.171655	1	0.310618	0.0308761	0.707602	0	0.791069
ENSRNOG00000002550	ATRX_RAT		X	93.9038	94.0513	NA	NA	0.182382	1.09811	0	0	0.654138	1	1.00501	0.0943029	0.251023	0	4.44101
ENSRNOG00000002553	RGD1311122	Uncharacterized protein C4orf34 homolog [Source:UniProtKB/Swiss-Prot;Acc:Q498C7]	14	45.4772	45.5208	30.9393	30.9478	0.574073	1.01426	0	0	0.975252	1	1.0089	-0.150213	0.0665411	0	5.11552
ENSRNOG00000002556	B0BN59_RAT	pre-rRNA-processing protein TSR2 homolog [Source:RefSeq peptide;Acc:NP_001108499]	X	40.4047	40.4131	NA	NA	0.0135079	1.09728	0	0	1	1	0.987584	0.0996881	0.224848	0	4.48496
ENSRNOG00000002559	Cacna1a	NA	19	25.1882	25.4245	16.3115	16.4013	0.529532	0.978918	0	0	0.500609	1	1.06566	-0.0174141	0.832489	0	4.81468
ENSRNOG00000002563	Mcts1	Malignant T-cell-amplified sequence 1 [Source:UniProtKB/Swiss-Prot;Acc:Q4G009]	X	6.76479	6.7762	NA	NA	0.480411	0.969136	0	0	0.777434	1	1.04	-0.0782915	0.340938	0	4.64748
ENSRNOG00000002565	Taf1	TAF1 RNA polymerase II, TATA box binding protein (TBP)-associated factor [Source:MGI Symbol;Acc:MGI:1336878]	X	89.5905	89.665	NA	NA	NA	NA	0	0	0.813312	1	1.01055	0.0507472	0.537418	0	3.43328
ENSRNOG00000002569	Mrps14	28S ribosomal protein S14, mitochondrial [Source:RefSeq peptide;Acc:NP_001099433]	13	75.6148	75.6206	35.1787	35.1824	NA	NA	0	0	0.845217	1	0.971632	0.157788	0.0538006	0	3.48698
ENSRNOG00000002572	Cacybp	Calcyclin-binding protein [Source:UniProtKB/Swiss-Prot;Acc:Q6AYK6]	13	75.6232	75.6336	35.184	35.1908	0.0489003	1.22287	0	0	0.365183	1	1.11141	-0.132993	0.104715	0	5.71316
ENSRNOG00000002574	Nubp1	Cytosolic Fe-S cluster assembly factor NUBP1 [Source:UniProtKB/Swiss-Prot;Acc:Q5I0L4]	10	5.20663	5.2172	0.998215	1.00696	0.184921	0.909017	0	0	0.872709	1	1.07495	0.0269346	0.743532	0	3.07914
ENSRNOG00000002575	Sap30l	Protein Sap30l [Source:UniProtKB/TrEMBL;Acc:D3ZJK3]	10	43.3969	43.4044	40.2199	40.2247	0.835594	0.989286	0	0	0.8269	1	0.962681	0.0145162	0.860052	0	3.81222
ENSRNOG00000002579	Parm1	prostate androgen-regulated mucin-like protein 1 homolog precursor [Source:RefSeq peptide;Acc:NP_775137]	14	18.046	18.0783	11.9953	12.0181	0.145835	0.929948	0	0	0.936887	1	0.973585	-0.116759	0.154762	0	3.18261
ENSRNOG00000002580	RGD1307890	TRMT1-like protein [Source:UniProtKB/Swiss-Prot;Acc:Q496Z9]	13	66.301	66.3341	28.6767	28.7005	0.028405	1.07	0	0	0.780316	1	1.01134	-0.120164	0.143003	0	2.78771
ENSRNOG00000002585	Cul4b	cullin-4B [Source:RefSeq peptide;Acc:NP_001100421]	X	6.80051	6.83802	NA	NA	0.978257	1.00074	0	0	0.672776	1	1.00271	0.12319	0.133132	0	3.62201
ENSRNOG00000002587	LOC498265	cDNA sequence BC055324 [Source:MGI Symbol;Acc:MGI:3590554]	13	79.711	79.7549	37.8226	37.8509	NA	NA	0	0	0.753306	1	0.983367	0.0513179	0.532847	0	0.825496
ENSRNOG00000002588	Clec16a	Protein Clec16a [Source:UniProtKB/TrEMBL;Acc:D3ZQY9]	10	4.8735	5.06953	0.722625	0.88479	NA	NA	0	0	0.693768	1	1.06327	-0.0118032	0.88601	0	3.59813
ENSRNOG00000002592	F1LYL8_RAT	ribosomal protein S6 kinase alpha-6 [Source:RefSeq peptide;Acc:NP_001178650]	X	99.7978	99.8642	NA	NA	NA	NA	0	0	0.609727	1	0.827023	0.0516717	0.530022	0	1.51943
ENSRNOG00000002593	Esrrg	Estrogen-related receptor gamma [Source:UniProtKB/Swiss-Prot;Acc:P62510]	13	104.138	104.405	53.7	53.7	NA	NA	0	0	0.830031	1	1.0618	-0.118187	0.149746	0	2.94329
ENSRNOG00000002595	Dpp10	Inactive dipeptidyl peptidase 10 [Source:UniProtKB/Swiss-Prot;Acc:Q6Q629]	13	35.5362	35.7225	3.45265	3.55202	NA	NA	0	0	0.74565	1	1.00448	0.0975689	0.234908	0	4.86589
ENSRNOG00000002607	LOC100361122	Protein LOC100361122 [Source:UniProtKB/TrEMBL;Acc:F1LYL9]	10	102.387	102.389	90.965	90.9671	NA	NA	0	0	0.111542	1	1.38181	-0.0297045	0.718219	0	2.16299
ENSRNOG00000002609	D3ZNZ5_RAT	ERO1-like protein beta [Source:RefSeq peptide;Acc:NP_001178822]	17	67.0146	67.0561	40.5106	40.5408	NA	NA	0	0	0.587533	1	1.0028	-0.118167	0.149814	0	2.87262
ENSRNOG00000002610	Carhsp1	Calcium-regulated heat stable protein 1 [Source:UniProtKB/Swiss-Prot;Acc:Q9WU49]	10	6.98658	7.00017	2.47072	2.48196	0.0229834	1.20131	0	0	0.158467	1	1.32251	-0.138104	0.0919195	0	3.18553
ENSRNOG00000002612	Ddx52	Probable ATP-dependent RNA helicase DDX52 [Source:UniProtKB/Swiss-Prot;Acc:Q99PT0]	10	72.2227	72.2454	60.5301	60.5475	0.375042	1.0631	0	0	0.570947	1	1.09466	-0.000796481	0.992282	0	2.1405
ENSRNOG00000002615	Pmm2	phosphomannomutase 2 [Source:RefSeq peptide;Acc:NP_001100443]	10	7.00134	7.02252	2.48293	2.50045	0.05223	1.09237	0	0	0.661306	1	1.07448	-0.0967013	0.239117	0	3.29824
ENSRNOG00000002618	Ivns1abp	influenza virus NS1A binding protein [Source:RefSeq peptide;Acc:NP_001040550]	13	66.2233	66.2355	28.6208	28.6296	NA	NA	0	0	1	1	0.986392	-0.0188524	0.818882	0	5.82892
ENSRNOG00000002625	Ptpn4	tyrosine-protein phosphatase non-receptor type 4 [Source:RefSeq peptide;Acc:NP_001093949]	13	32.4382	32.6109	1.80506	1.89571	NA	NA	0	0	0.467345	1	1.06017	0.0546425	0.506608	0	3.02456
ENSRNOG00000002626	LOC100364059		10	82.2157	82.2383	68.1941	68.2145	NA	NA	0	0	0.895798	1	0.931814	-0.121689	0.13796	0	5.00921
ENSRNOG00000002627	Kctd3	BTB/POZ domain-containing protein KCTD3 [Source:RefSeq peptide;Acc:NP_001100669]	13	105.117	105.156	53.7	53.7	0.271622	1.03803	0	0	0.105264	1	1.23718	-0.0895329	0.275904	0	3.93711
ENSRNOG00000002630	Cnot8	CCR4-NOT transcription complex subunit 8 [Source:RefSeq peptide;Acc:NP_001008383]	10	43.7433	43.7519	40.4409	40.4464	0.253445	0.966742	0	0	0.39397	1	0.895602	-0.138506	0.0909688	0	4.79198
ENSRNOG00000002632	B2RYX0_RAT	nascent polypeptide-associated complex subunit alpha isoform 2 [Source:RefSeq peptide;Acc:NP_001185509]	7	1.33079	1.3425	0	0	0.769715	1.00676	0	0	0.637131	1	1.06231	0.0332104	0.686616	0	6.29292
ENSRNOG00000002635	Dexi	dexamethasone-induced transcript [Source:RefSeq peptide;Acc:NP_001102496]	10	5.07204	5.08472	0.886866	0.897362	0.600275	1.03277	0	0	0.391421	1	1.10626	-0.0569412	0.488866	0	3.74419
ENSRNOG00000002636	Abat	4-aminobutyrate aminotransferase, mitochondrial 4-aminobutyrate aminotransferase, brain isoform 4-aminobutyrate aminotransferase, liver isoform [Source:UniProtKB/Swiss-Prot;Acc:P50554]	10	7.04073	7.13715	2.51551	2.59528	0.571604	0.972704	0	0	0.683057	1	0.966706	0.0815717	0.32103	0	5.46132
ENSRNOG00000002642	Ptges3	Prostaglandin E synthase 3 [Source:UniProtKB/Swiss-Prot;Acc:P83868]	7	1.35121	1.36886	0	0	NA	NA	0	0	0.193708	1	1.1239	-0.126671	0.122433	0	5.93208
ENSRNOG00000002643	Ugdh	UDP-glucose 6-dehydrogenase [Source:RefSeq peptide;Acc:NP_112615]	14	45.5428	45.571	30.9521	30.9576	0.304078	1.07684	0	0	0.787853	1	1.0417	-0.0835487	0.309403	0	2.72155
ENSRNOG00000002644	Utp18	UTP18, small subunit processome component [Source:RefSeq peptide;Acc:NP_001128511]	10	82.5157	82.5427	68.4641	68.4884	0.630969	0.969784	0	0	0.806026	1	0.924989	0.140979	0.0852886	0	2.75
ENSRNOG00000002645	D3ZGD0_RAT	gem-associated protein 5 [Source:RefSeq peptide;Acc:NP_001165560]	10	43.7551	43.7964	40.4485	40.4748	NA	NA	0	0	0.972919	1	0.995061	-0.0942229	0.251427	0	1.63885
ENSRNOG00000002652	Garnl4	rap1 GTPase-activating protein 2 [Source:RefSeq peptide;Acc:NP_001100489]	10	61.6771	61.7363	52.4733	52.5185	0.240374	0.963554	0	0	0.879624	1	0.965008	-0.0872591	0.288332	0	5.57193
ENSRNOG00000002653	Kcnk2	potassium channel subfamily K member 2 isoform 2 [Source:RefSeq peptide;Acc:NP_742039]	13	105.376	105.518	53.7	53.7	0.585928	0.973653	0	0	0.274153	1	1.16332	-0.155253	0.0578188	0	3.73507
ENSRNOG00000002654	FAM120C	Protein FAM120C [Source:UniProtKB/TrEMBL;Acc:D3ZNI4]	X	40.6666	40.8227	NA	NA	0.0863233	0.915626	0	0	0.90393	1	0.98007	0.0255674	0.75613	0	3.45466
ENSRNOG00000002657	Pla2g4a	cytosolic phospholipase A2 [Source:RefSeq peptide;Acc:NP_598235]	13	64.1357	64.2808	27.1177	27.2222	0.139246	0.887699	0	0	0.785539	1	0.851597	-0.165103	0.0434822	0	0.958483
ENSRNOG00000002660	Magee1	Melanoma-associated antigen E1 [Source:UniProtKB/Swiss-Prot;Acc:A1A5P9]	X	93.1924	93.1952	NA	NA	NA	NA	0	0	0.543671	1	1.04763	0.0689151	0.402047	0	4.26993
ENSRNOG00000002662	RGD1562502	uncharacterized protein LOC363485 [Source:RefSeq peptide;Acc:NP_001102288]	X	93.1519	93.1566	NA	NA	0.676821	0.93845	0	0	0.736847	1	1.03549	0.0188009	0.819369	0	3.21245
ENSRNOG00000002664	Emp2	epithelial membrane protein 2 [Source:RefSeq peptide;Acc:NP_001007722]	10	5.31116	5.34804	1.08468	1.11519	NA	NA	0	0	0.673597	1	0.891079	-0.104225	0.204343	0	0.945418
ENSRNOG00000002667	Lamc2	laminin, gamma 2 precursor [Source:RefSeq peptide;Acc:NP_001094110]	13	68.1523	68.2107	30.0167	30.0615	NA	NA	0	0	0.754325	1	1.08335	0.0558034	0.497606	0	0.736989
ENSRNOG00000002669	RGD1307222		10	61.9305	61.9516	52.6669	52.683	NA	NA	0	0	0.610836	1	0.948404	-0.0188809	0.818614	0	4.37234
ENSRNOG00000002671	Nme2	Nucleoside diphosphate kinase B [Source:UniProtKB/Swiss-Prot;Acc:P19804]	10	82.5828	82.5883	68.5245	68.5294	NA	NA	0	0	0.807431	1	0.955074	0.103141	0.209118	0	6.17407
ENSRNOG00000002680	Lamc1	laminin, gamma 1 precursor [Source:RefSeq peptide;Acc:NP_446418]	13	68.2436	68.3692	30.0868	30.183	NA	NA	0	0	0.716526	1	1.05498	0.0828873	0.313261	0	2.54003
ENSRNOG00000002682	B2GUW5_RAT	zinc finger protein 692 [Source:RefSeq peptide;Acc:NP_001119744]	10	43.9453	43.9527	40.5698	40.5746	NA	NA	0	0	0.856895	1	0.974951	0.112901	0.16895	0	3.0836
ENSRNOG00000002693	Nme1	Nucleoside diphosphate kinase A [Source:UniProtKB/Swiss-Prot;Acc:Q05982]	10	82.5917	82.6011	68.5325	68.541	0.202366	1.03697	0	0	0.663558	1	1.05787	0.0433513	0.598368	0	5.91574
ENSRNOG00000002695	Tfb2m	Dimethyladenosine transferase 2, mitochondrial [Source:UniProtKB/Swiss-Prot;Acc:Q5U2T7]	13	95.2285	95.2463	48.8245	48.8373	0.0557712	1.07391	0	0	0.37843	1	1.12743	0.0752976	0.359777	0	3.24684
ENSRNOG00000002697	Mtmr1	myotubularin-related protein 1 [Source:RefSeq peptide;Acc:NP_001178654]	18	0.205546	0.237603	0	0	0.0956401	0.811947	0	0	0.702704	1	1.02706	-0.0303214	0.712622	0	3.40037
ENSRNOG00000002705	Vps4b	vacuolar protein sorting-associated protein 4B [Source:RefSeq peptide;Acc:NP_001020887]	13	12.9598	12.9849	0.91658	0.915147	NA	NA	0	0	0.749483	1	0.898603	-0.0425726	0.604962	0	3.67318
ENSRNOG00000002708	RGD1561065	histone lysine demethylase PHF8 [Source:RefSeq peptide;Acc:NP_001101723]	X	40.8699	40.9672	NA	NA	NA	NA	0	0	0.315274	1	1.18132	0.0852448	0.299649	0	2.51386
ENSRNOG00000002710	Cnst		13	95.2465	95.3209	48.8375	48.8911	NA	NA	0	0	0.717886	1	0.93312	0.0379182	0.645027	0	2.778
ENSRNOG00000002713	Znf672	Zinc finger protein 672 [Source:UniProtKB/Swiss-Prot;Acc:Q642B2]	10	43.9532	43.9615	40.5749	40.5802	0.0692821	1.12843	0	0	0.586024	1	1.10124	0.0186657	0.820645	0	2.30878
ENSRNOG00000002714	RGD1311433	Protein RGD1311433 [Source:UniProtKB/TrEMBL;Acc:D3Z9R2]	10	7.15796	7.17213	2.6125	2.62422	0.0422254	0.892073	0	0	0.439643	1	0.88258	0.130056	0.112678	0	3.4615
ENSRNOG00000002721	Ndufb4	NADH dehydrogenase (ubiquinone) 1 beta subcomplex 4 [Source:RefSeq peptide;Acc:NP_001032415]	11	64.8526	64.8595	44.9676	44.9734	NA	NA	0	0	0.783839	1	1.01335	-0.196272	0.0160761	0	6.06678
ENSRNOG00000002722	Sec14l1	SEC14-like protein 1 [Source:RefSeq peptide;Acc:NP_001101779]	10	107.221	107.268	95.3	95.3	0.769635	1.00954	0	0	0.907801	1	1.0233	0.0152078	0.853457	0	5.15148
ENSRNOG00000002724	Prpsap2	Phosphoribosyl pyrophosphate synthase-associated protein 2 [Source:UniProtKB/Swiss-Prot;Acc:O08618]	10	47.8904	47.9254	43.0872	43.1096	0.0601769	1.10148	0	0	0.574445	1	1.07487	0.0327482	0.690753	0	3.98301
ENSRNOG00000002730	Rgs5	Regulator of G-protein signaling 5 [Source:UniProtKB/Swiss-Prot;Acc:P49800]	13	85.4453	85.4825	41.7806	41.8074	0.113456	0.874801	0	0	0.428659	1	0.861895	-0.0919917	0.262878	0	4.967
ENSRNOG00000002731	D3ZKJ1_RAT		13	76.017	76.0188	35.4383	35.4394	NA	NA	0	0	0.251449	1	0.754413	-0.0312494	0.70423	0	1.94195
ENSRNOG00000002734	LOC302473		X	150.054	150.057	NA	NA	NA	NA	0	0	0.969829	1	0.948146	-0.0379199	0.645012	0	3.04294
ENSRNOG00000002735	Dhx9	ATP-dependent RNA helicase A [Source:RefSeq peptide;Acc:NP_001100654]	13	68.4713	68.508	30.2613	30.2895	0.460718	1.06644	0	0	1	1	0.963735	0.00483755	0.953149	0	4.51174
ENSRNOG00000002736	Rabgap1l	rab GTPase-activating protein 1-like [Source:RefSeq peptide;Acc:NP_001100660]	13	75.6548	76.2757	35.2045	35.6052	0.300255	1.09703	0	0	0.820343	1	0.997353	0.0756105	0.357778	0	4.19348
ENSRNOG00000002737	Sh3bp5l	SH3 domain-binding protein 5-like [Source:RefSeq peptide;Acc:NP_001121053]	10	43.9692	43.9835	40.5851	40.5943	0.674705	0.974054	0	0	0.718334	1	1.08348	0.100108	0.222893	0	3.1079
ENSRNOG00000002746	Fstl1	follistatin-like 1 [Source:MGI Symbol;Acc:MGI:102793]	11	64.6716	64.7357	44.8163	44.8698	0.932546	0.989824	0	0	0.752933	1	1.01441	-0.163168	0.0460354	0	3.70343
ENSRNOG00000002748	Ccdc43	Coiled-coil domain-containing protein 43 [Source:UniProtKB/Swiss-Prot;Acc:Q5BK07]	10	91.8012	91.8134	78.2614	78.276	0.999592	0.997475	0	0	1	1	0.954695	0.225932	0.00543618	0	2.57596
ENSRNOG00000002749	E9PU51_RAT	C-Jun-amino-terminal kinase-interacting protein 4 [Source:RefSeq peptide;Acc:NP_001101760]	10	82.6284	82.7628	68.5655	68.6865	0.159741	1.04187	0	0	0.733681	1	1.01956	-0.0146069	0.859186	0	5.52027
ENSRNOG00000002750	LOC680586	RING CCCH (C3H) domains 1 [Source:MGI Symbol;Acc:MGI:2685397]	13	76.4934	76.53	35.7457	35.7694	NA	NA	0	0	0.638693	1	1.07367	-0.0193022	0.814638	0	2.59248
ENSRNOG00000002751	Zdhhc15	Palmitoyltransferase ZDHHC15 [Source:UniProtKB/Swiss-Prot;Acc:Q2TGJ4]	X	92.5682	92.7004	NA	NA	NA	NA	0	0	0.713495	1	0.887704	0.148917	0.0689495	0	1.71733
ENSRNOG00000002753	Adam11	disintegrin and metalloproteinase domain-containing protein 11 [Source:RefSeq peptide;Acc:NP_001101770]	10	91.8806	91.8972	78.3568	78.3766	NA	NA	0	0	0.649454	1	1.08477	0.0659425	0.422701	0	4.8479
ENSRNOG00000002755	Pafah1b1	Platelet-activating factor acetylhydrolase IB subunit alpha [Source:UniProtKB/Swiss-Prot;Acc:P63004]	10	61.9553	61.9666	52.6859	52.6945	0.466868	1.03732	0	0	1	1	0.959734	-0.0394418	0.631792	0	7.27134
ENSRNOG00000002757	Tada2l	Transcriptional adapter 2-alpha [Source:UniProtKB/Swiss-Prot;Acc:Q6AYE3]	10	72.366	72.4133	60.6396	60.6758	NA	NA	0	0	0.889812	1	1.00725	0.11115	0.1757	0	2.7402
ENSRNOG00000002759	Lias	Lipoyl synthase, mitochondrial [Source:UniProtKB/Swiss-Prot;Acc:Q5XIH4]	14	45.5753	45.5925	30.9585	30.9619	0.0873641	0.891481	0	0	0.489551	1	0.880332	0.0243869	0.76706	0	3.13612
ENSRNOG00000002763	D3Z9J7_RAT	serine/threonine-protein kinase ULK2 [Source:RefSeq peptide;Acc:NP_001178574]	10	47.9333	48.0095	43.1146	43.1632	NA	NA	0	0	0.732041	1	0.946337	0.0586533	0.475872	0	4.12564
ENSRNOG00000002764	D3ZL08_RAT	methyltransferase like 16 [Source:MGI Symbol;Acc:MGI:1914743]	10	62.0876	62.1331	52.7869	52.8217	NA	NA	0	0	0.217729	1	1.29607	0.0645611	0.432504	0	2.83014
ENSRNOG00000002767	Dlg3	Disks large homolog 3 [Source:UniProtKB/Swiss-Prot;Acc:Q62936]	X	88.7776	88.8285	NA	NA	0.171663	0.959582	0	0	0.848422	1	0.969995	-0.0741136	0.367403	0	4.94537
ENSRNOG00000002768	Tmem114	transmembrane protein 114 [Source:RefSeq peptide;Acc:NP_001128110]	10	7.21636	7.2321	2.66081	2.67383	NA	NA	0	0	2.68966264713749e-05	0.0273298	2.20214	-0.135359	0.0986275	0	1.12144
ENSRNOG00000002773	Rgs4	Regulator of G-protein signaling 4 [Source:UniProtKB/Swiss-Prot;Acc:P49799]	13	85.5339	85.5402	41.8444	41.8489	0.302599	0.931132	0	0	0.28487	1	0.842174	-0.104387	0.203638	0	6.42875
ENSRNOG00000002775	Npl	N-acetylneuraminate lyase [Source:UniProtKB/Swiss-Prot;Acc:Q66H59]	13	68.524	68.5673	30.3018	30.3349	0.92631	1.00346	0	0	0.598998	1	0.898334	-0.0847007	0.302755	0	2.03637
ENSRNOG00000002778	Aatf	Protein AATF [Source:UniProtKB/Swiss-Prot;Acc:Q9QYW0]	10	72.7017	72.7945	60.8961	60.967	0.748878	0.963845	0	0	0.941814	1	1.05845	-0.0248296	0.762956	0	2.38145
ENSRNOG00000002781	Kdsr	3-ketodihydrosphingosine reductase [Source:RefSeq peptide;Acc:NP_001101812]	13	12.915	12.9469	0.919145	0.917323	0.028841	0.885862	0	0	0.355876	1	1.24613	0.0154176	0.851459	0	2.62641
ENSRNOG00000002784	Pou3f4	POU domain, class 3, transcription factor 4 [Source:UniProtKB/Swiss-Prot;Acc:P62516]	X	99.2145	99.2157	NA	NA	NA	NA	0	0	0.588805	1	1.14979	-0.0848927	0.301657	0	1.54938
ENSRNOG00000002789			X	98.8819	98.8826	NA	NA	NA	NA	0	0	0.593621	1	0.981962	-0.147136	0.0723749	0	3.57849
ENSRNOG00000002790	Abcb7	ATP-binding cassette sub-family B member 7, mitochondrial [Source:RefSeq peptide;Acc:NP_997683]	X	92.2801	92.3499	NA	NA	NA	NA	0	0	0.989602	1	0.981611	0.0363679	0.65861	0	2.65605
ENSRNOG00000002791	Bcl2	apoptosis regulator Bcl-2 [Source:RefSeq peptide;Acc:NP_058689]	13	12.7307	12.9051	0.929672	0.919708	NA	NA	0	0	0.731884	1	0.886047	0.0103845	0.899635	0	1.71432
ENSRNOG00000002793	Sstr2	Somatostatin receptor type 2 [Source:UniProtKB/Swiss-Prot;Acc:P30680]	10	103.247	103.254	91.9963	92.0053	0.335194	1.0749	0	0	0.000648054	0.284348	1.91586	-0.160573	0.0496567	0	2.846
ENSRNOG00000002795	Cog1	component of oligomeric golgi complex 1 [Source:RefSeq peptide;Acc:NP_001100532]	10	103.28	103.293	92.0354	92.0517	0.942417	1.00187	0	0	0.800626	1	0.985925	-0.0493285	0.548867	0	3.82769
ENSRNOG00000002800	Gdpd2	glycerophosphoinositol inositolphosphodiesterase GDPD2 [Source:RefSeq peptide;Acc:NP_001100414]	X	88.7445	88.7533	NA	NA	NA	NA	0	0	0.416922	1	0.871447	0.0923011	0.261269	0	1.55208
ENSRNOG00000002803	CNOT6_RAT	CCR4-NOT transcription complex subunit 6 [Source:RefSeq peptide;Acc:NP_001013878]	10	35.1394	35.1725	34.4759	34.5153	NA	NA	0	0	0.628342	1	1.06021	-0.101389	0.216995	0	3.81866
ENSRNOG00000002807	Sept9	Septin-9 [Source:UniProtKB/Swiss-Prot;Acc:Q9QZR6]	10	107.344	107.48	95.3	95.3	0.0201361	1.17301	0	0	0.184703	1	1.187	-0.191802	0.0187072	0	4.54429
ENSRNOG00000002810	Gfpt2	Glucosamine--fructose-6-phosphate aminotransferase [isomerizing] 2 [Source:UniProtKB/Swiss-Prot;Acc:Q4KMC4]	10	35.302	35.3354	34.6694	34.7092	NA	NA	0	0	0.0979775	1	0.720321	0.107374	0.190928	0	0.891863
ENSRNOG00000002811	Fam5c	Protein FAM5C [Source:UniProtKB/Swiss-Prot;Acc:Q8K1M7]	13	60.5843	61.0242	24.5607	24.8774	NA	NA	0	0	0.351833	1	0.970125	-0.0653967	0.426558	0	2.70376
ENSRNOG00000002813	Dars2	Aspartate--tRNA ligase, mitochondrial [Source:UniProtKB/Swiss-Prot;Acc:Q3KRD0]	13	76.5999	76.6289	35.8145	35.8332	0.0665164	0.859097	0	0	0.974908	1	0.972921	0.0117712	0.886317	0	1.96556
ENSRNOG00000002814	Higd1b	HIG1 domain family member 1B [Source:RefSeq peptide;Acc:NP_001099314]	10	92.01	92.0117	78.512	78.5141	NA	NA	0	0	0.544919	1	1.09355	0.105239	0.199954	0	0.992588
ENSRNOG00000002815	F5	coagulation factor V [Source:RefSeq peptide;Acc:NP_001041343]	13	79.924	79.9973	37.96	38.0073	0.640858	1.02868	0	0	0.646917	1	0.874501	0.0304405	0.711542	0	1.44335
ENSRNOG00000002816	LOC288913	NA	19	25.5988	25.6016	16.4675	16.4686	0.280665	0.92327	0	0	0.631983	1	1.08973	-0.0487009	0.553969	0	4.1344
ENSRNOG00000002818	Eftud2	Protein Eftud2 [Source:UniProtKB/TrEMBL;Acc:F1LM66]	10	92.0122	92.0496	78.5146	78.5595	0.058423	0.930359	0	0	0.561883	1	0.944292	-0.0476448	0.562606	0	4.54296
ENSRNOG00000002821	Phlpp1	PH domain leucine-rich repeat protein phosphatase 1 [Source:RefSeq peptide;Acc:NP_067689]	13	12.3432	12.5657	0.951818	0.939103	NA	NA	0	0	0.387817	1	1.10136	-0.0578177	0.48219	0	3.90735
ENSRNOG00000002823	Mapk9	Mitogen-activated protein kinase 9 [Source:UniProtKB/Swiss-Prot;Acc:P49186]	10	35.3447	35.3843	34.7202	34.7673	0.00265424	0.813559	1	0	0.964485	1	0.970666	-0.145603	0.075431	0	6.11542
ENSRNOG00000002824	Rlim	E3 ubiquitin-protein ligase RLIM [Source:RefSeq peptide;Acc:NP_001020063]	X	91.9695	91.9853	NA	NA	NA	NA	0	0	0.617165	1	1.0129	-0.165704	0.0427136	0	3.46491
ENSRNOG00000002826	Hsd17b7	3-keto-steroid reductase [Source:UniProtKB/Swiss-Prot;Acc:Q62904]	13	85.7761	85.793	42.0188	42.0309	NA	NA	0	0	0.53566	1	1.12993	-0.0857621	0.296715	0	2.05123
ENSRNOG00000002827	A2bp1	fox-1 homolog A [Source:RefSeq peptide;Acc:NP_001100444]	10	8.21347	8.56158	3.48569	3.77367	0.663586	0.994053	0	0	0.464753	1	1.05517	-0.196903	0.0157318	0	6.26451
ENSRNOG00000002828	Tob1	protein Tob1 [Source:RefSeq peptide;Acc:NP_579851]	10	82.8526	82.8537	68.7673	68.7683	NA	NA	0	0	0.292519	1	1.15536	-0.0531153	0.518577	0	3.80656
ENSRNOG00000002831	Wfikkn2	Protein Wfikkn2 [Source:UniProtKB/TrEMBL;Acc:D3Z9K5]	10	82.8763	82.8808	68.7886	68.7928	NA	NA	0	0	0.720511	1	1.17247	0.140865	0.0855435	0	1.48854
ENSRNOG00000002832	Slc16a2	monocarboxylate transporter 8 [Source:RefSeq peptide;Acc:NP_671749]	X	91.7006	91.8251	NA	NA	NA	NA	0	0	0.166537	1	0.778462	0.0810259	0.32429	0	2.72746
ENSRNOG00000002833	Gsk3b	Glycogen synthase kinase-3 beta [Source:UniProtKB/Swiss-Prot;Acc:P18266]	11	64.2848	64.4287	44.4927	44.6131	0.912044	0.982953	0	0	0.682311	1	1.03468	-0.0905037	0.27071	0	4.93228
ENSRNOG00000002835	Luc7l3	luc7-like protein 3 [Source:RefSeq peptide;Acc:NP_001101761]	10	82.9301	82.9661	68.8371	68.8695	0.422642	1.03787	0	0	0.908069	1	0.966162	0.0753972	0.35914	0	5.81387
ENSRNOG00000002837	Ier2	NA	19	25.1593	25.1608	16.3005	16.3011	0.740733	1.11494	0	0	0.147554	1	1.65264	-0.0895578	0.27577	0	2.06558
ENSRNOG00000002838	Pdzd11	PDZ domain-containing protein 11 [Source:RefSeq peptide;Acc:NP_001100415]	X	88.6212	88.6242	NA	NA	0.56764	1.0298	0	0	0.688186	1	0.924997	-0.201079	0.0136112	0	3.70839
ENSRNOG00000002839	Slc19a2	thiamine transporter 1 [Source:RefSeq peptide;Acc:NP_001025195]	13	80.0178	80.0318	38.0206	38.0296	0.0808087	0.907186	0	0	0.134288	1	0.785703	-0.0777742	0.344148	0	2.47519
ENSRNOG00000002840	Atp5b	ATP synthase subunit beta, mitochondrial precursor [Source:RefSeq peptide;Acc:NP_599191]	7	1.37655	1.38323	0	0	0.189367	0.957809	0	0	0.226508	1	0.865875	-0.00782613	0.924275	0	8.4369
ENSRNOG00000002841	Cdc42bpa	serine/threonine-protein kinase MRCK alpha [Source:RefSeq peptide;Acc:NP_446109]	13	95.6403	95.8655	49.121	49.2832	0.632202	0.972659	0	0	0.917771	1	0.964225	-0.127981	0.118582	0	4.62783
ENSRNOG00000002844	Usp27x	ubiquitin specific peptidase 27, X chromosome [Source:MGI Symbol;Acc:MGI:1859645]	X	27.1984	27.1998	NA	NA	NA	NA	0	0	0.796799	1	0.951881	-0.0334362	0.684599	0	2.85845
ENSRNOG00000002848	Maoa	amine oxidase [Source:RefSeq peptide;Acc:NP_387502]	X	17.6786	17.7459	NA	NA	NA	NA	0	0	0.890618	1	1.00429	0.0290627	0.724058	0	4.10909
ENSRNOG00000002851	Fam104a	uncharacterized protein LOC619573 [Source:RefSeq peptide;Acc:NP_001030130]	10	103.291	103.312	92.0495	92.0746	0.883864	1.0047	0	0	0.974213	1	1.02794	-0.0955439	0.244812	0	3.60617
ENSRNOG00000002852	Myo19	myosin XIX [Source:RefSeq peptide;Acc:NP_001157208]	10	73.1565	73.1852	61.2436	61.2655	NA	NA	0	0	0.674832	1	0.94412	0.0968204	0.238536	0	1.20527
ENSRNOG00000002855	Rfc1	replication factor C (activator 1) 1 [Source:RefSeq peptide;Acc:NP_445999]	14	45.6657	45.7414	30.9762	30.991	0.9597	1.0014	0	0	0.958663	1	0.98615	-0.0142638	0.862461	0	3.36056
ENSRNOG00000002860	RGD1309708	Uncharacterized protein C1orf114 homolog [Source:UniProtKB/Swiss-Prot;Acc:Q6AYN9]	13	80.0402	80.0538	38.035	38.0438	0.0911978	1.07624	0	0	0.270453	1	1.1126	0.000446242	0.995676	0	3.93391
ENSRNOG00000002862	Clcn5	H(+)/Cl(-) exchange transporter 5 [Source:UniProtKB/Swiss-Prot;Acc:P51796]	X	27.3566	27.4099	NA	NA	NA	NA	0	0	0.723141	1	0.825786	-0.075319	0.35964	0	1.5031
ENSRNOG00000002863	Cacna1e	voltage-dependent R-type calcium channel subunit alpha-1E [Source:RefSeq peptide;Acc:NP_062167]	13	69.3673	69.6839	30.9482	31.191	NA	NA	0	0	0.583793	1	1.05811	0.0319037	0.698335	0	3.89636
ENSRNOG00000002864	Nacc1	Nucleus accumbens-associated protein 1 [Source:UniProtKB/Swiss-Prot;Acc:O35260]	19	25.1318	25.1486	16.2901	16.2965	0.283012	0.949654	0	0	0.588661	1	1.1377	0.000869373	0.991576	0	4.54411
ENSRNOG00000002871	RGD1565486	RNA binding motif protein 25 [Source:RefSeq peptide;Acc:NP_001102454]	10	10.3777	10.3796	5.27608	5.27768	0.225092	1.10693	0	0	0.608718	1	0.991303	0.163499	0.0455902	0	4.57427
ENSRNOG00000002873	Fam183b	Protein Fam183b [Source:UniProtKB/TrEMBL;Acc:D3Z8P9]	10	45.0223	45.0321	41.2571	41.2634	0.340072	1.04843	0	0	0.249122	1	2.61588	-0.00242144	0.976539	0	1.56694
ENSRNOG00000002874	Rbm25		6	107.712	107.722	67.0568	67.0657	0.767579	1.02027	0	0	0.705409	1	0.988523	-0.142668	0.081575	0	4.82265
ENSRNOG00000002875	Klhl20	Kelch-like protein 20 [Source:UniProtKB/Swiss-Prot;Acc:D3Z8N4]	13	76.6558	76.7006	35.8506	35.8795	0.395378	0.9732	0	0	0.891137	1	0.961154	0.0475613	0.563292	0	2.67035
ENSRNOG00000002876	Fam86a	uncharacterized protein LOC302931 [Source:RefSeq peptide;Acc:NP_001100445]	10	10.4505	10.4606	5.33635	5.34467	NA	NA	0	0	0.312293	1	0.885804	0.0152274	0.853271	0	0.588317
ENSRNOG00000002877	HUWE1_RAT	HECT, UBA and WWE domain containing 1 [Source:MGI Symbol;Acc:MGI:1926884]	X	41.2953	41.3969	NA	NA	0.259998	0.879388	0	0	0.922673	1	1.0091	-0.0925784	0.259833	0	5.76688
ENSRNOG00000002879	Psen2	Presenilin-2 Presenilin-2 NTF subunit Presenilin-2 CTF subunit [Source:UniProtKB/Swiss-Prot;Acc:O88777]	13	95.9342	95.9571	49.3327	49.3491	NA	NA	0	0	0.583371	1	1.16629	0.0713348	0.385687	0	3.05095
ENSRNOG00000002881	Ddr2	discoidin domain-containing receptor 2 precursor [Source:RefSeq peptide;Acc:NP_113952]	13	85.8015	85.8466	42.037	42.0696	NA	NA	0	0	0.915535	1	0.997066	-0.0393369	0.632699	0	1.72101
ENSRNOG00000002882	Zcchc2	Zinc finger CCHC domain-containing protein 2 [Source:UniProtKB/Swiss-Prot;Acc:Q498S6]	13	12.1481	12.1965	0.962967	0.960197	NA	NA	0	0	0.631516	1	1.05231	-0.0162834	0.843221	0	2.18101
ENSRNOG00000002883	D3Z8M7_RAT	chitobiosyldiphosphodolichol beta-mannosyltransferase precursor [Source:RefSeq peptide;Acc:NP_001101734]	10	10.4601	10.4708	5.34426	5.35313	0.519159	0.941044	0	0	0.637675	1	0.943033	0.0237149	0.773303	0	2.58574
ENSRNOG00000002884	Blzf1	Golgin-45 [Source:RefSeq peptide;Acc:NP_001017494]	13	80.0574	80.0734	38.0461	38.0564	0.352172	1.04408	0	0	0.527732	1	1.11454	-0.107445	0.190633	0	2.47494
ENSRNOG00000002886	Myh10	myosin-10 [Source:RefSeq peptide;Acc:NP_113708]	10	55.4453	55.5761	47.9079	47.9914	0.0587836	0.951034	0	0	0.856779	1	0.959217	-0.120055	0.143367	0	5.69511
ENSRNOG00000002887	Rnf187	NA	10	45.2226	45.2273	41.3849	41.3879	NA	NA	0	0	0.699583	1	1.05914	-0.0251105	0.760355	0	7.3149
ENSRNOG00000002890	Ankrd45		13	76.7246	76.7383	35.8949	35.9038	NA	NA	0	0	0.743108	1	1.01739	-0.0695338	0.397825	0	3.94817
ENSRNOG00000002894	Mnt	max-binding protein MNT [Source:RefSeq peptide;Acc:NP_001099277]	10	62.1466	62.1618	52.832	52.8436	0.679022	1.01492	0	0	0.28432	1	1.16134	0.0707837	0.389377	0	2.99169
ENSRNOG00000002895	Nagpa	N-acetylglucosamine-1-phosphodiester alpha-N-acetylglucosaminidase [Source:RefSeq peptide;Acc:NP_001101735]	10	10.4952	10.5036	5.37334	5.38023	NA	NA	0	0	0.715475	1	1.10008	0.0310094	0.706397	0	1.51532
ENSRNOG00000002896	Prdx6	Peroxiredoxin-6 [Source:UniProtKB/Swiss-Prot;Acc:O35244]	13	76.8244	76.8355	35.9594	35.9666	0.0238788	0.813468	0	0	0.0052089	0.852229	0.735953	0.0897978	0.27448	0	6.01278
ENSRNOG00000002898	Nme7	nucleoside diphosphate kinase 7 [Source:RefSeq peptide;Acc:NP_612541]	13	80.1036	80.2142	38.0759	38.1474	0.953085	0.993838	0	0	0.51871	1	0.873612	-0.0777529	0.344281	0	2.99575
ENSRNOG00000002899	Akap10	A kinase anchor protein 10, mitochondrial [Source:RefSeq peptide;Acc:NP_001108078]	10	48.0311	48.0879	43.177	43.2132	0.236079	1.06628	0	0	0.83185	1	1.02584	-0.0191938	0.815661	0	2.67915
ENSRNOG00000002903	Cytsb	cytospin-B [Source:RefSeq peptide;Acc:NP_001034106]	10	48.1182	48.3907	43.2326	43.4065	NA	NA	0	0	0.740452	1	1.0343	-0.00858528	0.916955	0	3.66888
ENSRNOG00000002907	F1M9K3_RAT	Protein Plekha6 [Source:UniProtKB/TrEMBL;Acc:D3ZWN0]	13	46.0792	46.2153	12.278	12.4122	NA	NA	0	0	0.646577	1	1.0672	0.0175172	0.831512	0	3.92731
ENSRNOG00000002908	Slc35a4	Probable UDP-sugar transporter protein SLC35A4 [Source:UniProtKB/Swiss-Prot;Acc:Q91ZR7]	18	29.3178	29.3219	17.3606	17.3616	0.0623559	0.90138	0	0	0.593807	1	0.946305	0.0519064	0.528153	0	3.84715
ENSRNOG00000002911	Alb	Serum albumin [Source:UniProtKB/Swiss-Prot;Acc:P02770]	14	19.127	19.1422	12.756	12.7667	0.405097	0.938434	0	0	4.81662969072394e-07	0.000929899	0.320312	-0.0343571	0.676393	0	1.18766
ENSRNOG00000002912	D3ZJM8_RAT	poly(A)-specific ribonuclease PARN [Source:RefSeq peptide;Acc:NP_001257344]	10	1.78875	1.92206	0	0	NA	NA	0	0	0.239436	1	1.21771	-0.0670537	0.414909	0	2.14254
ENSRNOG00000002914	F1MAP8_RAT	N(2),N(2)-dimethylguanosine tRNA methyltransferase [Source:RefSeq peptide;Acc:NP_001013892]	19	25.1199	25.13	16.2855	16.2894	0.576944	0.971286	0	0	0.496384	1	1.10682	0.0294573	0.720465	0	3.34773
ENSRNOG00000002915	TRI11_RAT	E3 ubiquitin-protein ligase TRIM11 [Source:RefSeq peptide;Acc:NP_001101746]	10	45.2706	45.2831	41.4155	41.4235	NA	NA	0	0	0.977295	1	1.0063	0.067203	0.413869	0	1.95644
ENSRNOG00000002916	Car4	Carbonic anhydrase 4 [Source:UniProtKB/Swiss-Prot;Acc:P48284]	10	73.2292	73.2377	61.2991	61.3056	0.234104	0.922581	0	0	0.249731	1	1.17388	-0.0642838	0.434488	0	3.38782
ENSRNOG00000002917	Sec14l5	SEC14-like protein 5 [Source:RefSeq peptide;Acc:NP_001129182]	10	10.5124	10.5511	5.38752	5.41953	NA	NA	0	0	0.38711	1	1.35935	-0.05471	0.506082	0	1.58404
ENSRNOG00000002919	Gfap	Glial fibrillary acidic protein [Source:UniProtKB/Swiss-Prot;Acc:P47819]	10	92.0599	92.0686	78.5719	78.5823	0.36256	0.945211	0	0	0.886953	1	1.02877	-0.14588	0.0748703	0	6.4043
ENSRNOG00000002922	Adora2b	adenosine receptor A2b [Source:RefSeq peptide;Acc:NP_058857]	10	48.4216	48.438	43.4262	43.4366	0.477244	1.03864	0	0	0.847811	1	0.998556	0.024106	0.769668	0	1.59484
ENSRNOG00000002926	Uap1	UDP-N-acetylhexosamine pyrophosphorylase [Source:RefSeq peptide;Acc:NP_001178859]	13	85.9531	85.9799	42.1462	42.1655	0.702353	1.03283	0	0	0.634471	1	0.937733	-0.0321721	0.695922	0	2.54496
ENSRNOG00000002928	Guk1	guanylate kinase [Source:RefSeq peptide;Acc:NP_001013133]	10	45.4892	45.4974	41.555	41.5602	NA	NA	0	0	0.88631	1	0.981809	0.200859	0.0137166	0	5.6034
ENSRNOG00000002932	Wdr19	WD repeat-containing protein 19 [Source:RefSeq peptide;Acc:NP_001178608]	14	45.7443	45.8048	30.9916	31.0034	NA	NA	0	0	0.69896	1	1.03796	-0.0134673	0.870072	0	2.81614
ENSRNOG00000002934	Atp1b1	Sodium/potassium-transporting ATPase subunit beta-1 [Source:UniProtKB/Swiss-Prot;Acc:P07340]	13	80.2141	80.2349	38.1473	38.1607	0.398994	1.03281	0	0	0.984095	1	0.993439	-0.203627	0.0124442	0	9.02092
ENSRNOG00000002935	Ankrd40	ankyrin repeat domain-containing protein 40 [Source:RefSeq peptide;Acc:NP_001128171]	10	82.9774	82.9852	68.8797	68.8867	0.2379	1.05256	0	0	0.577062	1	1.06256	-0.127307	0.12055	0	5.60262
ENSRNOG00000002940	Ankrd17	ankyrin repeat domain-containing protein 17 [Source:RefSeq peptide;Acc:NP_001099469]	14	19.2488	19.3871	12.8418	12.939	0.872617	1.00504	0	0	0.891254	1	0.964531	0.0324975	0.693001	0	4.24862
ENSRNOG00000002941	Uhmk1	Serine/threonine-protein kinase Kist [Source:UniProtKB/Swiss-Prot;Acc:Q63285]	13	86.0109	86.026	42.1878	42.1987	NA	NA	0	0	0.475292	1	0.84781	0.0542833	0.509409	0	4.68329
ENSRNOG00000002943	Mrpl55	39S ribosomal protein L55, mitochondrial [Source:RefSeq peptide;Acc:NP_001099252]	10	45.5063	45.5094	41.5659	41.5679	0.626959	0.978775	0	0	1	1	1.02607	0.00207298	0.979914	0	3.10891
ENSRNOG00000002944	RGD1304587	Multiple myeloma tumor-associated protein 2 homolog [Source:UniProtKB/Swiss-Prot;Acc:Q5M9I6]	10	45.5126	45.5151	41.57	41.5715	0.507391	0.972139	0	0	0.261935	1	1.21192	-0.122715	0.134645	0	2.58784
ENSRNOG00000002947	Dpt	dermatopontin precursor [Source:RefSeq peptide;Acc:NP_001099435]	13	80.5629	80.5914	38.3724	38.3908	NA	NA	0	0	0.224346	1	1.254	0.0927704	0.258842	0	0.661987
ENSRNOG00000002949	Pgs1	Protein Pgs1; Similar to phosphatidylglycerophosphate synthase (Predicted), isoform CRA_a [Source:UniProtKB/TrEMBL;Acc:D4A5W8]	10	107.979	108.014	95.3	95.3	NA	NA	0	0	0.822166	1	0.995076	0.0642749	0.434551	0	3.59663
ENSRNOG00000002950	Lyl1	Protein lyl-1 [Source:UniProtKB/Swiss-Prot;Acc:Q66HH3]	19	25.1152	25.1181	16.2838	16.2849	NA	NA	0	0	0.549502	1	0.830983	-0.0627815	0.445324	0	0.596257
ENSRNOG00000002953	P2ry4	P2Y purinoceptor 4 [Source:UniProtKB/Swiss-Prot;Acc:O35811]	X	88.5895	88.5909	NA	NA	NA	NA	0	0	0.262439	1	0.775219	0.0625593	0.446939	0	0.832702
ENSRNOG00000002956	Stim2	stromal interaction molecule 2 precursor [Source:RefSeq peptide;Acc:NP_001099220]	14	61.6307	61.7598	36.7538	36.8399	0.302191	1.06765	0	0	0.53142	1	1.04278	-0.0764764	0.352284	0	3.59829
ENSRNOG00000002959	F1LVL5_RAT	protein Shroom4 [Source:RefSeq peptide;Acc:NP_001178659]	X	29.1398	29.3343	NA	NA	NA	NA	0	0	0.734266	1	0.994658	-0.0372817	0.65059	0	0.737576
ENSRNOG00000002960	Ndp	norrin precursor [Source:RefSeq peptide;Acc:NP_001102284]	X	17.4169	17.4414	NA	NA	0.39876	1.02932	0	0	0.979341	1	1.0098	0.038992	0.635687	0	2.65491
ENSRNOG00000002963	C1ql1	C1q-related factor [Source:RefSeq peptide;Acc:NP_001102308]	10	92.1091	92.1163	78.631	78.6396	0.138782	0.854899	0	0	0.737697	1	0.969351	0.108776	0.185163	0	2.89037
ENSRNOG00000002969	Itpkb	Inositol-trisphosphate 3-kinase B [Source:UniProtKB/Swiss-Prot;Acc:P42335]	13	96.0443	96.1385	49.4119	49.4797	NA	NA	0	0	0.379145	1	1.11183	-0.0367288	0.655437	0	2.78409
ENSRNOG00000002970	RGD1310324	zinc finger, SWIM-type containing 7 [Source:RefSeq peptide;Acc:NP_001156964]	10	48.4389	48.4508	43.4372	43.4448	NA	NA	0	0	0.906529	1	0.890847	0.173067	0.0341826	0	0.981367
ENSRNOG00000002972	RGD1565283	uncharacterized protein LOC498274 [Source:RefSeq peptide;Acc:NP_001102544]	13	86.1507	86.1543	42.2885	42.2911	NA	NA	0	0	0.618085	1	1.14282	0.193084	0.017917	0	0.871334
ENSRNOG00000002976	RGD1305539	Protein RGD1305539 [Source:UniProtKB/TrEMBL;Acc:D3ZBC9]	11	64.1933	64.2366	44.4162	44.4524	NA	NA	0	0	0.755029	1	1.0717	0.20015	0.0140604	0	1.62433
ENSRNOG00000002977	Ttc19	Tetratricopeptide repeat protein 19, mitochondrial [Source:UniProtKB/Swiss-Prot;Acc:D4A6D7]	10	48.4509	48.479	43.4449	43.4628	0.135962	0.965939	0	0	0.697841	1	1.00318	0.0381013	0.64343	0	4.40902
ENSRNOG00000002980	LOC100360406	RCG34104, isoform CRA_a; Uncharacterized protein [Source:UniProtKB/TrEMBL;Acc:D3ZEM8]	10	62.2074	62.2189	52.8785	52.8872	0.375164	0.967123	0	0	0.93588	1	0.970257	0.0312192	0.704503	0	3.18603
ENSRNOG00000002981	Cacna1g	voltage-dependent T-type calcium channel subunit alpha-1G [Source:RefSeq peptide;Acc:NP_113789]	10	83.0436	83.1124	68.9393	69.0012	NA	NA	0	0	0.920447	1	1.03661	-0.140182	0.0870861	0	3.4342
ENSRNOG00000002983	Nfix	NF1-X1 protein [Source:RefSeq peptide;Acc:NP_110493]	19	25.0184	25.1114	16.247	16.2823	0.520609	1.08661	0	0	0.528143	1	1.09258	-0.0779253	0.343209	0	4.6538
ENSRNOG00000002985	Nos1ap	carboxyl-terminal PDZ ligand of neuronal nitric oxide synthase protein [Source:RefSeq peptide;Acc:NP_620277]	13	86.1593	86.4328	42.2947	42.4916	0.774399	1.01678	0	0	0.684098	1	1.0017	0.125195	0.126884	0	4.04552
ENSRNOG00000002987	Myh2	NA	10	53.7769	53.955	46.8433	46.957	NA	NA	0	0	0.185282	1	1.31478	0.0225557	0.784105	0	1.24019
ENSRNOG00000002989	Nmt1	Glycylpeptide N-tetradecanoyltransferase 1 [Source:UniProtKB/Swiss-Prot;Acc:Q8K1Q0]	10	92.1966	92.2306	78.736	78.7767	0.41346	0.955382	0	0	0.806791	1	1.02461	0.0224846	0.784769	0	4.64873
ENSRNOG00000002991	Srr	Serine racemase [Source:UniProtKB/Swiss-Prot;Acc:Q76EQ0]	10	62.2175	62.2348	52.8862	52.8994	NA	NA	0	0	0.800504	1	1.00277	-0.119198	0.146266	0	3.55657
ENSRNOG00000002993	Zc3h11a	zinc finger CCCH domain-containing protein 11A [Source:RefSeq peptide;Acc:NP_001041367]	13	46.5464	46.5851	12.7386	12.7768	NA	NA	0	0	0.690439	1	1.0379	0.00775324	0.924979	0	4.39104
ENSRNOG00000002994	Popdc2	popeye domain-containing protein 2 [Source:RefSeq peptide;Acc:NP_954544]	11	64.1543	64.1703	44.3836	44.397	NA	NA	0	0	0.855743	1	0.960769	-0.04016	0.625592	0	0.997361
ENSRNOG00000002997	Slc9a3r2	Na(+)/H(+) exchange regulatory cofactor NHE-RF2 [Source:RefSeq peptide;Acc:NP_446263]	10	13.8903	13.9008	8.18197	8.19067	0.979762	1.00894	0	0	0.509614	1	1.10029	0.0897765	0.274595	0	4.04654
ENSRNOG00000002999	RGD1359380	Translocase of inner mitochondrial membrane domain-containing protein 1 [Source:UniProtKB/Swiss-Prot;Acc:Q6AY94]	11	64.0074	64.0318	44.2607	44.2811	0.686262	1.02303	0	0	0.760614	1	0.948536	0.0838829	0.307464	0	3.76008
ENSRNOG00000003003	Tbc1d19	TBC1 domain family member 19 [Source:RefSeq peptide;Acc:NP_001099478]	14	61.8403	61.9583	36.8935	36.9722	0.254707	0.91625	0	0	0.54714	1	1.14616	-0.0274501	0.738799	0	3.3772
ENSRNOG00000003005	Rasgef1c	ras-GEF domain-containing family member 1C [Source:RefSeq peptide;Acc:NP_001101743]	10	35.4032	35.4702	34.7899	34.8696	0.554257	1.03337	0	0	0.915457	1	1.01321	-0.0120077	0.884049	0	2.5391
ENSRNOG00000003011	Gadd45gip1	Growth arrest and DNA damage-inducible proteins-interacting protein 1 [Source:UniProtKB/Swiss-Prot;Acc:Q5XJW2]	19	24.9773	24.9794	16.2314	16.2322	0.625246	1.03058	0	0	0.41309	1	1.09078	0.0566426	0.491153	0	4.85953
ENSRNOG00000003013	Rpgr	Protein Rpgr; Rpgr protein [Source:UniProtKB/TrEMBL;Acc:B1WC72]	X	24.7224	24.7827	NA	NA	NA	NA	0	0	0.392017	1	1.12916	0.0511099	0.534511	0	1.98218
ENSRNOG00000003014	Ktelc1	KTEL (Lys-Tyr-Glu-Leu) containing 1 precursor [Source:RefSeq peptide;Acc:NP_001094122]	11	63.9759	64.0048	44.2344	44.2585	0.997433	0.997657	0	0	0.964381	1	1.0105	0.0584346	0.477521	0	3.33238
ENSRNOG00000003018	Olfml2b	olfactomedin-like protein 2B precursor [Source:RefSeq peptide;Acc:NP_001100665]	13	86.4816	86.5188	42.5268	42.5535	NA	NA	0	0	0.140739	1	0.771976	0.0462545	0.574074	0	1.64137
ENSRNOG00000003019	Ubn1	ubinuclein-1 [Source:RefSeq peptide;Acc:NP_001100447]	10	10.6125	10.6479	5.47032	5.4996	0.487052	1.07019	0	0	0.691124	1	1.05492	-0.00952577	0.907896	0	3.16785
ENSRNOG00000003025	Nap1l2	nucleosome assembly protein 1-like 2 [Source:RefSeq peptide;Acc:NP_001019960]	X	91.1286	91.13	NA	NA	NA	NA	0	0	0.464005	1	1.04835	0.0436286	0.596027	0	5.09797
ENSRNOG00000003026	Rad23a	UV excision repair protein RAD23 homolog A [Source:RefSeq peptide;Acc:NP_001013208]	19	24.9711	24.9769	16.229	16.2312	0.67532	1.01185	0	0	0.392243	1	1.15661	0.0774044	0.346454	0	3.82654
ENSRNOG00000003029	Calr	Calreticulin [Source:UniProtKB/Swiss-Prot;Acc:P18418]	19	24.9648	24.9697	16.2266	16.2285	0.149529	1.05343	0	0	0.55219	1	1.05226	-0.126751	0.122195	0	7.24343
ENSRNOG00000003031	Atp2b4	plasma membrane calcium-transporting ATPase 4 [Source:RefSeq peptide;Acc:NP_001005871]	13	46.6314	46.697	12.8223	12.8871	0.446487	1.03721	0	0	0.639007	1	1.04647	0.0501623	0.542124	0	4.97934
ENSRNOG00000003033	Plcd3	1-phosphatidylinositol-4,5-bisphosphate phosphodiesterase delta-3 [Source:RefSeq peptide;Acc:NP_001099315]	10	92.2347	92.2754	78.7816	78.8305	NA	NA	0	0	0.511638	1	0.930792	0.0797512	0.331985	0	1.69277
ENSRNOG00000003038	Sft2d2	Vesicle transport protein SFT2B [Source:UniProtKB/Swiss-Prot;Acc:Q4FZV2]	13	80.9295	80.9462	38.6091	38.6198	NA	NA	0	0	0.226759	1	0.752441	0.0190693	0.816835	0	0.959365
ENSRNOG00000003041	Smg6	telomerase-binding protein EST1A [Source:RefSeq peptide;Acc:NP_001099278]	10	62.2345	62.4706	52.8991	53.0795	NA	NA	0	0	0.908198	1	0.997797	0.0446402	0.587525	0	2.45563
ENSRNOG00000003042	Mettl13	methyltransferase-like protein 13 [Source:RefSeq peptide;Acc:NP_001127973]	13	78.2133	78.227	36.8559	36.8647	0.821376	0.986563	0	0	0.807038	1	1.02723	0.0280777	0.73305	0	2.50416
ENSRNOG00000003048	Tiprl	TIP41-like protein [Source:UniProtKB/Swiss-Prot;Acc:A2VCX1]	13	80.9698	80.9947	38.6351	38.6511	NA	NA	0	0	0.576791	1	0.858156	-0.0243691	0.767225	0	4.13554
ENSRNOG00000003049	HCD2_RAT	3-hydroxyacyl-CoA dehydrogenase type-2 [Source:RefSeq peptide;Acc:NP_113870]	X	41.4893	41.4918	NA	NA	0.884315	0.990462	0	0	0.471672	1	0.928308	-0.0806063	0.32681	0	4.02477
ENSRNOG00000003050	Tbc1d9b	TBC1 domain family member 9B [Source:RefSeq peptide;Acc:NP_001101744]	10	35.6867	35.7213	35.1272	35.1684	0.534806	1.03431	0	0	0.374049	1	1.12761	-0.16109	0.0489166	0	4.09966
ENSRNOG00000003052	Cox18	mitochondrial inner membrane protein COX18 [Source:RefSeq peptide;Acc:NP_001099470]	14	19.3903	19.4019	12.9413	12.9495	0.947632	0.999013	0	0	0.858096	1	1.02049	-0.0428482	0.602625	0	2.33941
ENSRNOG00000003054	Cask	peripheral plasma membrane protein CASK [Source:RefSeq peptide;Acc:NP_071520]	X	20.911	21.2509	NA	NA	0.272184	1.05892	0	0	0.73043	1	0.939272	0.0571848	0.487006	0	3.81782
ENSRNOG00000003063	KPB1_RAT	phosphorylase b kinase regulatory subunit alpha, skeletal muscle isoform [Source:RefSeq peptide;Acc:NP_072148]	X	90.5535	90.6921	NA	NA	0.675234	0.983339	0	0	1	1	0.996408	0.162066	0.0475453	0	2.37297
ENSRNOG00000003065	N-pac	Putative oxidoreductase GLYR1 [Source:UniProtKB/Swiss-Prot;Acc:Q5RKH0]	10	10.6481	10.6835	5.49977	5.5291	0.0291269	1.10195	0	0	0.938605	1	1.02277	0.16458	0.0441602	0	4.89234
ENSRNOG00000003066	Wnt9a	protein Wnt-9a precursor [Source:RefSeq peptide;Acc:NP_001099253]	10	45.6137	45.6415	41.6344	41.6522	NA	NA	0	0	0.911466	1	0.992167	-0.0402845	0.624521	0	1.96408
ENSRNOG00000003068	RGD1564036	uncharacterized protein LOC497895 [Source:RefSeq peptide;Acc:NP_001102500]	10	35.7243	35.7513	35.1719	35.204	NA	NA	0	0	0.505592	1	0.876647	0.0478493	0.560929	0	1.41682
ENSRNOG00000003069	Cd38	ADP-ribosyl cyclase 1 [Source:UniProtKB/Swiss-Prot;Acc:Q64244]	14	72.3205	72.3603	43.8803	43.9069	0.249917	0.957693	0	0	0.589131	1	1.0738	0.147916	0.0708576	0	2.68776
ENSRNOG00000003070	PIGL_RAT	N-acetylglucosaminyl-phosphatidylinositol de-N-acetylase [Source:UniProtKB/Swiss-Prot;Acc:O35790]	10	48.6293	48.6894	43.5587	43.597	NA	NA	0	0	0.216037	1	0.808506	0.173467	0.0337637	0	1.31256
ENSRNOG00000003071	Vamp4	vesicle-associated membrane protein 4 [Source:RefSeq peptide;Acc:NP_001102326]	13	78.2472	78.2698	36.8777	36.8923	0.903493	0.995505	0	0	0.801407	1	0.942968	0.0520575	0.526951	0	5.10406
ENSRNOG00000003073	F1M5K1_RAT	Protein Gpr161 [Source:UniProtKB/TrEMBL;Acc:F1M5Q2]	13	81.0582	81.0749	38.6921	38.7029	NA	NA	0	0	0.829148	1	1.21171	0.0950959	0.247042	0	2.04625
ENSRNOG00000003075	Tmem39a	Transmembrane protein 39A [Source:UniProtKB/Swiss-Prot;Acc:Q5U2V9]	11	63.9381	63.9672	44.2028	44.2271	0.970356	1.00449	0	0	0.919169	1	0.964819	-0.0620064	0.450974	0	1.91028
ENSRNOG00000003076	Rbms2	RNA-binding motif, single-stranded-interacting protein 2 [Source:RefSeq peptide;Acc:NP_001020574]	7	1.42664	1.46252	0	0	0.206838	1.08889	0	0	0.297158	1	0.869119	0.0196756	0.811119	0	3.1014
ENSRNOG00000003078	D4A8L4_RAT	DDB1 and CUL4 associated factor 6 [Source:MGI Symbol;Acc:MGI:1921356]	13	81.0827	81.1836	38.7079	38.7731	0.131219	0.910769	0	0	0.843402	1	1.00986	-0.212966	0.0088821	0	4.6831
ENSRNOG00000003081	Ribc1	RIB43A-like with coiled-coils protein 1 [Source:UniProtKB/Swiss-Prot;Acc:Q6AYL4]	X	41.4919	41.5031	NA	NA	NA	NA	0	0	0.981468	1	1.04331	0.0523313	0.524777	0	1.11346
ENSRNOG00000003084	Parp1	Poly [ADP-ribose] polymerase 1 [Source:UniProtKB/Swiss-Prot;Acc:P27008]	13	96.3097	96.3415	49.603	49.6259	0.866134	1.00404	0	0	0.935636	1	1.00357	0.139089	0.089603	0	3.55773
ENSRNOG00000003086	Cenpv		10	48.7051	48.7186	43.607	43.6157	0.826866	0.988802	0	0	0.58604	1	0.9352	0.0207832	0.800702	0	3.31378
ENSRNOG00000003088	Cdgap	rho GTPase-activating protein 31 [Source:RefSeq peptide;Acc:NP_001099349]	11	63.8149	63.929	44.0997	44.1952	NA	NA	0	0	0.53281	1	0.905442	-0.0843025	0.305042	0	1.84956
ENSRNOG00000003096	D4A974_RAT		10	62.4716	62.4765	53.0803	53.0841	NA	NA	0	0	0.31824	1	1.34413	-0.0114459	0.889439	0	0.63835
ENSRNOG00000003098	Prom1	prominin 1 isoform 2 precursor [Source:RefSeq peptide;Acc:NP_001103607]	14	72.123	72.2304	43.7487	43.8203	0.00286363	0.758908	1	0	0.133734	1	0.714962	0.113641	0.166158	0	2.10939
ENSRNOG00000003099	Ubqln2	ubiquilin-2 [Source:RefSeq peptide;Acc:NP_001101721]	X	37.9929	37.9963	NA	NA	0.946058	1.00317	0	0	0.48276	1	1.07013	0.0776302	0.345045	0	5.02883
ENSRNOG00000003100	Dusp12	Dual specificity protein phosphatase 12 [Source:UniProtKB/Swiss-Prot;Acc:Q9JIM4]	13	86.7371	86.7462	42.7107	42.7173	0.00365027	1.4007	0	0	0.186224	1	1.25393	-0.0623851	0.448208	0	1.91785
ENSRNOG00000003103	Lbr	lamin B receptor [Source:MGI Symbol;Acc:MGI:2138281]	13	97.8144	97.8349	50.6864	50.7011	NA	NA	0	0	0.9166	1	1.02301	-0.194803	0.0169026	0	2.223
ENSRNOG00000003104	Trpv2	Transient receptor potential cation channel subfamily V member 2 [Source:UniProtKB/Swiss-Prot;Acc:Q9WUD2]	10	48.7649	48.7861	43.6452	43.6588	NA	NA	0	0	0.348489	1	1.13554	-0.0970017	0.237653	0	2.41942
ENSRNOG00000003105	D4A976_RAT	kinesin family member 19A [Source:MGI Symbol;Acc:MGI:2447024]	10	104.648	104.674	93.6778	93.7089	NA	NA	0	0	0.865273	1	0.918779	0.141557	0.0840032	0	0.838806
ENSRNOG00000003108	Acbd4	Acyl-CoA-binding domain-containing protein 4 [Source:UniProtKB/Swiss-Prot;Acc:Q6DGF9]	10	92.277	92.286	78.8324	78.8432	0.339377	0.957436	0	0	0.604077	1	0.926187	0.130621	0.11111	0	3.7603
ENSRNOG00000003109	Btbd17	BTB/POZ domain-containing protein 17 precursor [Source:RefSeq peptide;Acc:NP_001128006]	10	104.674	104.681	93.7088	93.7166	NA	NA	0	0	0.961656	1	0.986388	-0.000636473	0.993832	0	1.94025
ENSRNOG00000003111	Ovca2	ovarian tumor suppressor candidate 2 [Source:RefSeq peptide;Acc:NP_001102506]	10	62.4851	62.4862	53.0906	53.0915	0.792207	0.984356	0	0	0.693056	1	0.932788	-0.0249682	0.761672	0	2.86915
ENSRNOG00000003114	B4galt4	Beta-1,4-galactosyltransferase 4 N-acetyllactosamine synthase Lactotriaosylceramide beta-1,4-galactosyltransferase [Source:UniProtKB/Swiss-Prot;Acc:Q66HH1]	11	63.7721	63.7979	44.064	44.0855	0.356629	0.959822	0	0	0.605088	1	0.900645	-0.0208009	0.800535	0	2.0998
ENSRNOG00000003116	Dph1	diphthamide biosynthesis protein 1 [Source:RefSeq peptide;Acc:NP_001099279]	10	62.4864	62.4921	53.0916	53.0959	NA	NA	0	0	0.306904	1	0.842538	0.0336086	0.683059	0	2.71465
ENSRNOG00000003117	Psmd12	26S proteasome non-ATPase regulatory subunit 12 [Source:RefSeq peptide;Acc:NP_001005875]	10	96.8814	96.9073	84.3576	84.3887	0.75268	0.98289	0	0	0.879106	1	0.979126	0.0199013	0.808993	0	4.68135
ENSRNOG00000003120	Prelp	Prolargin [Source:UniProtKB/Swiss-Prot;Acc:Q9EQP5]	13	46.8634	46.8742	13.0511	13.0617	NA	NA	0	0	0.407263	1	1.18227	-0.0254056	0.757625	0	2.59309
ENSRNOG00000003121	Rtn4rl1	Reticulon-4 receptor-like 1 [Source:UniProtKB/Swiss-Prot;Acc:Q80WD0]	10	62.5009	62.5766	53.1027	53.1605	0.119327	1.05633	0	0	0.771419	1	0.994362	-0.151694	0.0638736	0	4.32124
ENSRNOG00000003122	Hdac8	Histone deacetylase 8 [Source:UniProtKB/Swiss-Prot;Acc:B1WC68]	X	90.336	90.5445	NA	NA	0.402871	1.03063	0	0	0.956049	1	1.04815	-0.0218019	0.791152	0	2.36678
ENSRNOG00000003123	Rpa1	replication protein A 70 kDa DNA-binding subunit [Source:RefSeq peptide;Acc:NP_001041308]	10	62.6132	62.6566	53.1885	53.2216	NA	NA	0	0	0.556582	1	0.907119	0.205104	0.0118084	0	3.53298
ENSRNOG00000003125	Rogdi		10	10.6837	10.6883	5.52927	5.53309	0.653885	1.0232	0	0	0.558458	1	1.08763	0.116259	0.156547	0	5.53144
ENSRNOG00000003127	Spryd4	SPRY domain-containing protein 4 [Source:UniProtKB/Swiss-Prot;Acc:Q4FZT8]	7	1.49548	1.49706	0	0	0.96395	0.999639	0	0	0.335845	1	0.826955	0.0234322	0.775933	0	1.86967
ENSRNOG00000003129	F1LVS9_RAT	zinc finger protein 496 [Source:RefSeq peptide;Acc:NP_001258325]	10	45.7906	45.8075	41.7473	41.7581	NA	NA	0	0	0.812683	1	1.01337	-0.0109605	0.894099	0	1.54452
ENSRNOG00000003131	Traf7	E3 ubiquitin-protein ligase TRAF7 [Source:RefSeq peptide;Acc:NP_001121020]	10	13.7612	13.7708	8.07517	8.08313	NA	NA	0	0	0.87814	1	1.04267	0.0804072	0.32801	0	3.36503
ENSRNOG00000003132	Mip	Lens fiber major intrinsic protein [Source:UniProtKB/Swiss-Prot;Acc:P09011]	7	1.50902	1.51613	0	0	NA	NA	0	0	NA	NA	NA	0.0905783	0.270314	0	1.96196
ENSRNOG00000003134	Slc4a4	Electrogenic sodium bicarbonate cotransporter 1 [Source:UniProtKB/Swiss-Prot;Acc:Q9JI66]	14	20.3815	20.7392	13.6389	13.8906	0.125143	0.830686	0	0	0.719419	1	0.967353	0.00804481	0.922166	0	4.5478
ENSRNOG00000003138	Fcgr2a	Low affinity immunoglobulin gamma Fc region receptor III [Source:UniProtKB/Swiss-Prot;Acc:P27645]	13	86.809	86.9494	42.7625	42.8636	NA	NA	0	0	0.529529	1	0.943043	-0.12035	0.142378	0	2.06272
ENSRNOG00000003139	SMC1A_RAT	structural maintenance of chromosomes 1A [Source:MGI Symbol;Acc:MGI:1344345]	X	41.5034	41.5476	NA	NA	0.428588	1.04575	0	0	1	1	0.966385	0.107303	0.191224	0	4.66942
ENSRNOG00000003144	Gprc5c	G-protein coupled receptor family C group 5 member C precursor [Source:RefSeq peptide;Acc:NP_001178520]	10	104.732	104.754	93.7783	93.8054	NA	NA	0	0	0.421027	1	0.913103	0.0575813	0.483986	0	0.627686
ENSRNOG00000003146	RGD1305823	lisH domain-containing protein FOPNL [Source:RefSeq peptide;Acc:NP_001101731]	10	0.635532	0.658264	0	0	0.25454	0.957086	0	0	0.930117	1	1.02471	-0.012029	0.883845	0	3.4764
ENSRNOG00000003147	SQSTM_RAT	Sequestosome-1 [Source:UniProtKB/Swiss-Prot;Acc:O08623]	10	35.7513	35.7626	35.204	35.2175	0.129577	0.90858	0	0	0.504043	1	0.919387	0.308997	0.000119401	0	7.13933
ENSRNOG00000003148	TIMP2_RAT	Metalloproteinase inhibitor 2 [Source:UniProtKB/Swiss-Prot;Acc:P30121]	10	108.311	108.359	95.3	95.3	0.240528	1.09422	0	0	0.792726	1	1.05152	-0.0418899	0.610769	0	5.7804
ENSRNOG00000003149	Farsa	Phenylalanine--tRNA ligase alpha subunit [Source:UniProtKB/Swiss-Prot;Acc:Q505J8]	19	24.9477	24.9572	16.2201	16.2237	0.671571	0.959961	0	0	0.729991	1	1.05551	0.0595707	0.468986	0	3.22201
ENSRNOG00000003150	D4A0Q0_RAT	Mitochondrial pyruvate carrier 2 [Source:UniProtKB/Swiss-Prot;Acc:P38718]	13	81.1848	81.2036	38.7739	38.786	0.534617	1.0763	0	0	0.557699	1	1.05914	0.0749936	0.361725	0	3.8205
ENSRNOG00000003151	Bfar	Bifunctional apoptosis regulator [Source:UniProtKB/Swiss-Prot;Acc:Q5PQN2]	10	4.7e-05	0.013311	0	0	0.0918328	0.894507	0	0	0.734664	1	0.930068	0.0129001	0.875498	0	3.11453
ENSRNOG00000003158	F1M6G3_RAT	predicted gene 8444 [Source:MGI Symbol;Acc:MGI:3645809]	X	38.2483	38.2486	NA	NA	NA	NA	0	0	0.795986	1	0.952362	-0.0412179	0.616509	0	1.79881
ENSRNOG00000003160	RragB	Ras-related GTP-binding protein B [Source:UniProtKB/Swiss-Prot;Acc:Q63487]	X	38.353	38.3846	NA	NA	0.274138	1.07379	0	0	0.892192	1	0.976256	0.0900539	0.273109	0	5.08972
ENSRNOG00000003163	Sdhc	succinate dehydrogenase complex, subunit C [Source:RefSeq peptide;Acc:NP_001005534]	13	87.0146	87.0352	42.9105	42.9254	0.187422	0.967456	0	0	0.549798	1	0.960067	-0.0601129	0.464943	0	5.79187
ENSRNOG00000003171	Mpz	Myelin protein P0 [Source:UniProtKB/Swiss-Prot;Acc:P06907]	13	87.0405	87.0462	42.9291	42.9333	NA	NA	0	0	0.7911	1	1.86305	0.119865	0.144007	0	0.658079
ENSRNOG00000003172	Serpinf1	pigment epithelium-derived factor precursor [Source:RefSeq peptide;Acc:NP_808788]	10	62.7134	62.7187	53.2651	53.2691	0.331315	0.883928	0	0	0.708219	1	0.893474	-0.163958	0.0449788	0	2.08592
ENSRNOG00000003174	Tapt1	Protein Tapt1 [Source:UniProtKB/TrEMBL;Acc:D4A533]	14	72.0046	72.0494	43.6697	43.6996	NA	NA	0	0	1	1	0.949552	-0.261569	0.00122396	0	3.64347
ENSRNOG00000003177	MGC94725	Methionine adenosyltransferase 2 subunit beta [Source:UniProtKB/Swiss-Prot;Acc:Q5U2R0]	10	25.7131	25.7189	23.2219	23.2294	0.0293484	0.941257	0	0	0.810085	1	0.943653	0.0709241	0.388435	0	5.66978
ENSRNOG00000003178	Mageh1	Melanoma-associated antigen H1 [Source:UniProtKB/Swiss-Prot;Acc:Q5PPP4]	X	38.5842	38.5849	NA	NA	NA	NA	0	0	0.832605	1	1.00411	-0.0616028	0.453931	0	3.49056
ENSRNOG00000003180	F1LX16_RAT	NA	X	38.743	38.745	NA	NA	NA	NA	0	0	0.475513	1	1.07914	0.0619424	0.451442	0	1.98224
ENSRNOG00000003183	Fmod	fibromodulin precursor [Source:RefSeq peptide;Acc:NP_542429]	13	46.9877	46.9983	13.1736	13.1841	0.00585839	0.757515	0	0	0.49057	1	0.923724	0.021921	0.790037	0	2.06231
ENSRNOG00000003185	Acbd3	Golgi resident protein GCP60 [Source:RefSeq peptide;Acc:NP_878263]	13	96.4613	96.4891	49.7122	49.7322	0.315655	1.04949	0	0	0.832441	1	1.05503	-0.116436	0.155917	0	3.43614
ENSRNOG00000003186	Anks3	Ankyrin repeat and SAM domain-containing protein 3 [Source:UniProtKB/Swiss-Prot;Acc:Q5M9H0]	10	10.7321	10.7528	5.56929	5.58639	0.984862	0.991405	0	0	0.87678	1	0.989346	0.0558408	0.497318	0	2.94669
ENSRNOG00000003187	LOC100361182	armadillo repeat containing, X-linked 5 [Source:MGI Symbol;Acc:MGI:2148026]	X	123.061	123.063	NA	NA	NA	NA	0	0	0.900978	1	0.979142	0.0692956	0.399448	0	3.32646
ENSRNOG00000003189	Cited1	cbp/p300-interacting transactivator 1 [Source:RefSeq peptide;Acc:NP_742052]	X	90.3011	90.3058	NA	NA	NA	NA	0	0	0.64364	1	1.16995	-0.0266732	0.745935	0	1.67588
ENSRNOG00000003191	D4A8H7_RAT	Protein BHLHb9 [Source:UniProtKB/Swiss-Prot;Acc:Q71HP2]	X	123.149	123.152	NA	NA	0.903519	0.990898	0	0	0.441501	1	1.08433	0.00297969	0.971132	0	3.58446
ENSRNOG00000003192	LOC100360253	RAB37, member of RAS oncogene family [Source:MGI Symbol;Acc:MGI:1929945]	10	105.221	105.235	94.3646	94.3821	NA	NA	0	0	0.0449779	1	0.28407	0.00693365	0.932889	0	1.74256
ENSRNOG00000003194			X	123.284	123.284	NA	NA	NA	NA	0	0	0.635716	1	0.928054	-0.136861	0.0949099	0	1.71686
ENSRNOG00000003195	CSKI1_RAT	caskin-1 [Source:RefSeq peptide;Acc:NP_542421]	10	13.7406	13.7605	8.05811	8.07458	0.289492	1.0876	0	0	0.458035	1	1.1728	-0.01559	0.849817	0	4.21531
ENSRNOG00000003198	RGD1305733	Uncharacterized protein C16orf45 homolog [Source:UniProtKB/Swiss-Prot;Acc:Q5FVJ5]	10	0.072757	0.187514	0	0	0.0166644	0.942378	0	0	0.5749	1	0.925468	-0.0126228	0.878154	0	6.23787
ENSRNOG00000003201	LOC100362640	40S ribosomal protein S4, X isoform [Source:UniProtKB/Swiss-Prot;Acc:P62703]	X	90.2495	90.2538	NA	NA	NA	NA	0	0	0.278222	1	0.850233	-0.0391076	0.634685	0	5.6867
ENSRNOG00000003202	D3ZE18_RAT	NA	10	25.7332	25.7628	23.2483	23.2873	NA	NA	0	0	0.563402	1	0.806691	0.016927	0.837109	0	1.02359
ENSRNOG00000003203	Hexim1	Protein HEXIM1 [Source:UniProtKB/Swiss-Prot;Acc:Q5M9G1]	10	92.2903	92.2924	78.8483	78.8509	0.854036	1.02048	0	0	0.256343	1	1.13396	-0.124841	0.12797	0	4.22709
ENSRNOG00000003205	Ldb2	LIM domain-binding protein 2 [Source:RefSeq peptide;Acc:NP_001099479]	14	71.3747	71.6965	43.2498	43.4643	0.473736	1.06234	0	0	0.499886	1	1.037	0.0276155	0.737283	0	3.91603
ENSRNOG00000003206	Actr3	Actin-related protein 3 [Source:UniProtKB/Swiss-Prot;Acc:Q4V7C7]	13	37.8616	37.9046	4.69283	4.71578	0.0835327	0.960733	0	0	0.831433	1	0.936411	-0.103169	0.208991	0	6.00005
ENSRNOG00000003207	Fmnl1	formin-like protein 1 [Source:RefSeq peptide;Acc:NP_001099316]	10	92.3435	92.3841	78.9123	78.9609	0.133105	1.07442	0	0	0.382997	1	1.08841	-0.0858421	0.296263	0	4.48279
ENSRNOG00000003209	Pcp4l1	Purkinje cell protein 4-like protein 1 [Source:RefSeq peptide;Acc:NP_001119565]	13	87.0595	87.0831	42.9428	42.9598	0.729647	0.977202	0	0	0.388229	1	0.9278	-0.11571	0.158528	0	4.45865
ENSRNOG00000003211	Srp9	signal recognition particle 9 kDa protein [Source:RefSeq peptide;Acc:NP_001119567]	13	98.1255	98.1337	50.9104	50.9162	0.205358	0.956641	0	0	0.433806	1	1.01422	-0.0598783	0.46669	0	4.2842
ENSRNOG00000003213	Helz	probable helicase with zinc finger domain [Source:RefSeq peptide;Acc:NP_001099318]	10	96.9522	97.091	84.4427	84.6092	0.957217	1.00102	0	0	0.847237	1	0.991916	-0.0715304	0.384382	0	2.44266
ENSRNOG00000003214	Mmgt2		10	48.8522	48.854	43.7009	43.7021	0.274418	0.932909	0	0	0.196855	1	0.773231	-0.017535	0.831343	0	2.173
ENSRNOG00000003215	Znf287	zinc finger protein 287 [Source:RefSeq peptide;Acc:NP_001100478]	10	48.8963	48.9139	43.7291	43.7403	0.281229	1.05396	0	0	0.805702	1	0.935511	0.0643798	0.433801	0	1.76488
ENSRNOG00000003217	Lgals3bp	Galectin-3-binding protein [Source:UniProtKB/Swiss-Prot;Acc:O70513]	10	108.388	108.398	95.3	95.3	0.212072	1.13335	0	0	0.176662	1	0.88088	-0.0205289	0.80309	0	2.77694
ENSRNOG00000003218	Znf286a	zinc finger protein 286A [Source:RefSeq peptide;Acc:NP_001178850]	10	48.9517	48.9611	43.7644	43.7704	NA	NA	0	0	0.941251	1	1.00156	-0.0311339	0.705273	0	1.71979
ENSRNOG00000003219	Trim16	tripartite motif protein 16 [Source:RefSeq peptide;Acc:NP_001128505]	10	48.987	49.0097	43.7869	43.8014	0.237842	0.935747	0	0	0.423303	1	1.19226	-0.0912148	0.266948	0	1.17187
ENSRNOG00000003220	LOC100364712	Histone H3.3 [Source:UniProtKB/Swiss-Prot;Acc:P84245]	13	96.5396	96.5511	49.7685	49.7768	NA	NA	0	0	0.859174	1	1.01223	-0.0776	0.345233	0	6.07223
ENSRNOG00000003223	Degs1	Sphingolipid delta(4)-desaturase DES1 [Source:UniProtKB/Swiss-Prot;Acc:Q5XIF5]	13	98.243	98.2496	50.9949	50.9997	0.00312863	1.15034	0	0	0.844079	1	1.03242	-0.215565	0.00806679	0	5.17387
ENSRNOG00000003224	Nudt16l1	protein syndesmos [Source:RefSeq peptide;Acc:NP_001094252]	10	10.7532	10.7551	5.5867	5.58828	0.505133	0.971903	0	0	0.875563	1	1.02972	0.0699498	0.395001	0	4.21675
ENSRNOG00000003225	Nudcd2	NudC domain-containing protein 2 [Source:UniProtKB/Swiss-Prot;Acc:Q5M823]	10	25.7634	25.7679	23.2881	23.2941	NA	NA	0	0	0.901605	1	0.985774	-0.0414437	0.614578	0	1.92005
ENSRNOG00000003226	Mprip	myosin phosphatase Rho-interacting protein isoform 1 [Source:RefSeq peptide;Acc:NP_446266]	10	45.9757	46.0906	41.8654	41.9388	0.0861243	1.10242	0	0	0.913082	1	0.987019	0.0056287	0.945498	0	5.41603
ENSRNOG00000003228	Mid1ip1	Mid1-interacting protein 1 [Source:UniProtKB/Swiss-Prot;Acc:Q6P7D5]	X	24.2057	24.2079	NA	NA	0.261335	1.03682	0	0	0.703666	1	1.04619	0.0246678	0.764455	0	4.23212
ENSRNOG00000003229	Tspan7	tetraspanin-7 [Source:RefSeq peptide;Acc:NP_001102285]	X	24.3623	24.4596	NA	NA	0.726946	1.00968	0	0	0.981204	1	1.01462	-0.248413	0.00217547	0	8.50749
ENSRNOG00000003232	Slc9a3r1	Na(+)/H(+) exchange regulatory cofactor NHE-RF1 [Source:UniProtKB/Swiss-Prot;Acc:Q9JJ19]	10	105.238	105.255	94.3852	94.4057	NA	NA	0	0	0.0485244	1	0.71279	-0.0559119	0.49677	0	3.40009
ENSRNOG00000003234	Mgrn1	E3 ubiquitin-protein ligase MGRN1 [Source:UniProtKB/Swiss-Prot;Acc:Q5XIQ4]	10	10.7568	10.8059	5.58972	5.63032	NA	NA	0	0	0.861349	1	0.989317	0.0715108	0.384512	0	5.63458
ENSRNOG00000003235	Mgat4b	alpha-1,3-mannosyl-glycoprotein 4-beta-N-acetylglucosaminyltransferase B precursor [Source:RefSeq peptide;Acc:NP_001121005]	10	35.7628	35.7856	35.2177	35.2448	0.786288	1.00591	0	0	0.561129	1	0.937078	0.0825549	0.315213	0	3.46867
ENSRNOG00000003237	Tp53bp2	Protein Tp53bp2 [Source:UniProtKB/TrEMBL;Acc:F1M5H6]	13	98.4321	98.4679	51.1311	51.1569	NA	NA	0	0	0.0885797	1	1.25958	-0.0199173	0.808842	0	3.31562
ENSRNOG00000003239	Cant1	Soluble calcium-activated nucleotidase 1 [Source:UniProtKB/Swiss-Prot;Acc:Q8K4Y7]	10	108.405	108.411	95.3	95.3	0.827718	0.990898	0	0	0.948018	1	1.02394	0.0119437	0.884663	0	3.70514
ENSRNOG00000003241	Gabrg2	Gamma-aminobutyric acid receptor subunit gamma-2 [Source:UniProtKB/Swiss-Prot;Acc:P18508]	10	27.0376	27.1261	24.8347	24.94	NA	NA	0	0	0.543014	1	0.907703	-0.0463221	0.573514	0	5.46578
ENSRNOG00000003242	Gulp1	PTB domain-containing engulfment adapter protein 1 [Source:UniProtKB/Swiss-Prot;Acc:Q5PQS4]	9	43.66	43.7974	32.8836	32.992	0.882397	0.986288	0	0	0.951038	1	0.987414	0.0471488	0.566685	0	1.68487
ENSRNOG00000003243	Wdr81	WD repeat-containing protein 81 [Source:UniProtKB/Swiss-Prot;Acc:D4A929]	10	62.7577	62.771	53.2989	53.3091	0.206762	0.944666	0	0	0.473959	1	0.925479	0.0725526	0.377607	0	1.89094
ENSRNOG00000003244	Ltc4s	leukotriene C4 synthase [Source:RefSeq peptide;Acc:NP_446091]	10	35.7869	35.7888	35.2464	35.2487	NA	NA	0	0	0.861925	1	1.08346	-0.0216419	0.79265	0	1.20084
ENSRNOG00000003247	RGD1305572		13	96.5852	96.5998	49.8014	49.8119	NA	NA	0	0	0.378255	1	1.18739	-0.0155918	0.8498	0	2.56968
ENSRNOG00000003248	Mpzl1	Myelin protein zero-like protein 1 [Source:UniProtKB/Swiss-Prot;Acc:Q6AYT8]	13	81.3212	81.3579	38.8618	38.8856	0.00387047	0.856836	0	0	0.388403	1	0.891758	0.0200667	0.807437	0	3.62994
ENSRNOG00000003251	B3galt2	beta-1,3-galactosyltransferase 2 [Source:RefSeq peptide;Acc:NP_001102962]	13	57.4741	57.4831	22.3214	22.3279	NA	NA	0	0	0.989848	1	0.920768	0.0949447	0.247797	0	3.16256
ENSRNOG00000003253	Qdpr	Dihydropteridine reductase [Source:UniProtKB/Swiss-Prot;Acc:P11348]	14	70.742	70.7556	42.828	42.8371	0.0284187	0.880688	0	0	0.472011	1	0.944171	-0.032581	0.692251	0	6.03625
ENSRNOG00000003256	Ccng1	Cyclin-G1 [Source:UniProtKB/Swiss-Prot;Acc:P39950]	10	25.7764	25.7828	23.3052	23.3136	0.0632587	0.901553	0	0	0.419126	1	0.834534	0.0860697	0.294979	0	5.74769
ENSRNOG00000003258	Cdc73	parafibromin [Source:RefSeq peptide;Acc:NP_001019940]	13	57.4417	57.5344	22.298	22.3648	0.00132543	0.548478	1	0	0.102207	1	1.28195	0.119357	0.145727	0	2.61033
ENSRNOG00000003259	C1qtnf1	Complement C1q tumor necrosis factor-related protein 1 [Source:UniProtKB/Swiss-Prot;Acc:Q5XIG2]	10	108.432	108.452	95.3	95.3	NA	NA	0	0	0.735975	1	0.976755	-0.043618	0.596117	0	1.41466
ENSRNOG00000003260	Nr1i3	Nuclear receptor subfamily 1 group I member 3 [Source:UniProtKB/Swiss-Prot;Acc:Q9QUS1]	13	87.1039	87.1088	42.9748	42.9784	NA	NA	0	0	0.66192	1	1.06241	0.014838	0.856982	0	2.64271
ENSRNOG00000003261	Usp9x	probable ubiquitin carboxyl-terminal hydrolase FAF-X isoform 1 [Source:RefSeq peptide;Acc:NP_001129365]	X	21.6081	21.718	NA	NA	0.895266	1.00356	0	0	0.940697	1	0.953734	-0.000858706	0.991679	0	5.13749
ENSRNOG00000003262	Cacng4	Voltage-dependent calcium channel gamma-4 subunit [Source:UniProtKB/Swiss-Prot;Acc:Q8VHW9]	10	97.1394	97.2144	84.6673	84.7573	0.155571	0.933331	0	0	0.924399	1	1.06586	0.0350789	0.669988	0	3.97953
ENSRNOG00000003263	Lefty2	left-right determination factor 1 precursor [Source:RefSeq peptide;Acc:NP_001102550]	13	96.6214	96.6265	49.8274	49.8311	NA	NA	0	0	NA	NA	NA	-0.00325526	0.968464	0	9.31308
ENSRNOG00000003264	Nat9	N-acetyltransferase 9 [Source:RefSeq peptide;Acc:NP_001128307]	10	105.257	105.262	94.4082	94.4139	0.640688	0.972266	0	0	0.246262	1	0.869164	-0.132203	0.106811	0	2.6537
ENSRNOG00000003266	D4A938_RAT	RIKEN cDNA 1700023F06 gene [Source:MGI Symbol;Acc:MGI:1916691]	10	92.3842	92.3944	78.961	78.9733	NA	NA	0	0	0.930687	1	1.09021	0.00269701	0.97387	0	0.774446
ENSRNOG00000003267	Pycr2	Pyrroline-5-carboxylate reductase 2 [Source:UniProtKB/Swiss-Prot;Acc:Q6AY23]	13	96.6335	96.6372	49.8361	49.8388	0.281775	0.935366	0	0	0.90655	1	1.07536	0.148801	0.0691676	0	2.54794
ENSRNOG00000003268	Maml1	mastermind-like protein 1 [Source:RefSeq peptide;Acc:NP_001100467]	10	35.8148	35.8501	35.2797	35.3216	0.29122	1.06613	0	0	0.369207	1	0.893531	-0.0565643	0.491752	0	1.41159
ENSRNOG00000003269	Atp6v0e1	V-type proton ATPase subunit e 1 [Source:UniProtKB/Swiss-Prot;Acc:Q794C0]	10	16.7415	16.7646	11.3956	11.426	0.211387	0.951186	0	0	0.65469	1	1.00491	-0.0938531	0.253301	0	3.90809
ENSRNOG00000003272	Gpr173		X	41.8463	41.8474	NA	NA	NA	NA	0	0	0.921005	1	1.03232	-0.264177	0.00108822	0	1.81963
ENSRNOG00000003276	Myo1d	Unconventional myosin-Id [Source:UniProtKB/Swiss-Prot;Acc:Q63357]	10	68.7207	68.9977	57.8546	58.0663	0.116395	1.07372	0	0	0.26747	1	1.27771	-0.173021	0.0342313	0	2.75217
ENSRNOG00000003278	Map3k14	mitogen-activated protein kinase kinase kinase 14 [Source:RefSeq peptide;Acc:NP_001101771]	10	92.4061	92.4564	78.9873	79.0477	NA	NA	0	0	0.358354	1	1.15442	-0.0145553	0.859678	0	1.39322
ENSRNOG00000003279	Syce2	synaptonemal complex central element protein 2 [Source:RefSeq peptide;Acc:NP_001178486]	19	24.9251	24.9433	16.2115	16.2184	NA	NA	0	0	1	1	0.978595	0.0872377	0.28845	0	0.947843
ENSRNOG00000003280	Grin2c	Glutamate [NMDA] receptor subunit epsilon-3 [Source:UniProtKB/Swiss-Prot;Acc:Q00961]	10	105.323	105.341	94.488	94.5092	0.00294031	1.20376	1	0	0.707355	1	1.06713	-0.0649061	0.430044	0	3.16925
ENSRNOG00000003281	RGD1560557	DNA helicase MCM9 [Source:UniProtKB/Swiss-Prot;Acc:F1M5F3]	20	32.217	32.2973	24.6191	24.7089	NA	NA	0	0	0.760522	1	0.950034	0.0309561	0.706879	0	1.24787
ENSRNOG00000003283	Rcsd1	capZ-interacting protein [Source:RefSeq peptide;Acc:NP_001101819]	13	81.3708	81.3877	38.8939	38.9048	NA	NA	0	0	0.753894	1	1.01429	-0.135299	0.0987794	0	1.42255
ENSRNOG00000003284	Epn3	Epsin-3 [Source:UniProtKB/Swiss-Prot;Acc:Q4V882]	10	83.129	83.1374	69.0161	69.0237	NA	NA	0	0	0.839879	1	1.10074	-0.100671	0.220286	0	1.22556
ENSRNOG00000003285	LOC100362572	Mpv17 transgene, kidney disease mutant-like (Predicted), isoform CRA_b; Uncharacterized protein [Source:UniProtKB/TrEMBL;Acc:D4A908]	10	1.65556	1.67266	0	0	0.861238	1.03734	0	0	0.776809	1	0.93013	0.0117659	0.886368	0	2.74844
ENSRNOG00000003288	CCG5_RAT	Voltage-dependent calcium channel gamma-5 subunit [Source:UniProtKB/Swiss-Prot;Acc:Q8VHW8]	10	97.3006	97.309	84.8607	84.8708	NA	NA	0	0	0.496926	1	0.957946	0.103395	0.207991	0	2.62171
ENSRNOG00000003289	Lap3	Cytosol aminopeptidase [Source:UniProtKB/Swiss-Prot;Acc:Q68FS4]	14	70.6801	70.6991	42.7867	42.7994	0.0328755	1.14856	0	0	0.860349	1	1.01569	-0.140264	0.0869002	0	3.58189
ENSRNOG00000003290	D4A657_RAT	proline-rich coiled-coil 2C [Source:MGI Symbol;Acc:MGI:1913754]	13	78.3326	78.4006	36.9328	36.9768	NA	NA	0	0	0.649144	1	1.02228	-0.0327837	0.690435	0	3.70815
ENSRNOG00000003291	Creg1	protein CREG1 precursor [Source:RefSeq peptide;Acc:NP_001099436]	13	81.4913	81.5038	38.9717	38.9797	0.000251686	1.3863	1	1	0.0621999	1	1.3324	-0.00161252	0.984375	0	3.16515
ENSRNOG00000003296	Dck	deoxycytidine kinase [Source:RefSeq peptide;Acc:NP_077072]	14	20.8868	20.9043	13.9944	14.0067	0.451224	0.959794	0	0	0.222129	1	1.07623	0.0757954	0.356601	0	4.22471
ENSRNOG00000003299	D3ZRY2_RAT		10	25.8764	25.8776	23.437	23.4386	NA	NA	0	0	0.579998	1	0.891478	-0.0629451	0.444137	0	2.2386
ENSRNOG00000003300	Btg2	Protein BTG2 [Source:UniProtKB/Swiss-Prot;Acc:P27049]	13	47.027	47.0307	13.2123	13.216	0.736243	0.827119	0	0	0.180306	1	1.48748	0.0339322	0.680174	0	2.40322
ENSRNOG00000003302	Flcn	Folliculin [Source:UniProtKB/Swiss-Prot;Acc:Q76JQ2]	10	46.1105	46.1296	41.9515	41.9637	0.993005	1.00042	0	0	0.190844	1	1.2358	-0.133035	0.104603	0	3.44215
ENSRNOG00000003307	Gcdh	glutaryl-CoA dehydrogenase, mitochondrial [Source:RefSeq peptide;Acc:NP_001102366]	19	24.9195	24.9259	16.2094	16.2119	0.777249	1.00783	0	0	1	1	1.00623	-0.0741154	0.367391	0	3.71331
ENSRNOG00000003308	LOC689105	NA	13	89.5347	89.5361	44.725	44.726	0.000255771	0.706544	1	1	0.000155588	0.103579	0.581611	-0.0250927	0.76052	0	3.20194
ENSRNOG00000003310	Tmem6	transmembrane protein 6 [Source:RefSeq peptide;Acc:NP_001127968]	13	96.6715	96.7042	49.8635	49.887	0.0651627	1.15752	0	0	0.93108	1	1.16985	-0.0524682	0.523692	0	2.45959
ENSRNOG00000003312	Chi3l1	Chitinase-3-like protein 1 [Source:UniProtKB/Swiss-Prot;Acc:Q9WTV1]	13	47.1397	47.1476	13.3234	13.3312	0.0803283	0.84003	0	0	0.145902	1	0.852772	-0.0488804	0.552507	0	4.746
ENSRNOG00000003313	Glra2	Glycine receptor subunit alpha-2 [Source:UniProtKB/Swiss-Prot;Acc:P22771]	X	49.7555	49.9782	NA	NA	0.629068	1.02421	0	0	0.419838	1	1.16994	0.131786	0.107933	0	2.29892
ENSRNOG00000003315	Cops3	COP9 signalosome complex subunit 3 [Source:UniProtKB/Swiss-Prot;Acc:Q68FW9]	10	46.1398	46.1632	41.9702	41.9851	0.800717	0.994115	0	0	0.785212	1	0.946134	-0.156192	0.0563031	0	4.49818
ENSRNOG00000003326	Rrn3	RNA polymerase I-specific transcription initiation factor RRN3 [Source:RefSeq peptide;Acc:NP_001129318]	10	1.49218	1.5272	0	0	0.00932826	0.888775	0	0	0.109356	1	0.811161	0.130692	0.110914	0	3.96486
ENSRNOG00000003328	RGD1310686	LITAF-like protein [Source:UniProtKB/Swiss-Prot;Acc:Q5U2U6]	10	10.8916	10.914	5.7012	5.7198	0.78402	1.00777	0	0	0.61528	1	0.946793	-0.0754914	0.358538	0	5.81281
ENSRNOG00000003329	Ppm1d	protein phosphatase 1D [Source:RefSeq peptide;Acc:NP_001099295]	10	73.5755	73.6121	61.5637	61.5916	0.422596	0.952972	0	0	0.473887	1	1.13287	-0.0711766	0.386744	0	2.7905
ENSRNOG00000003330	Acsf2	Acyl-CoA synthetase family member 2, mitochondrial [Source:UniProtKB/Swiss-Prot;Acc:Q499N5]	10	83.1943	83.2383	69.0749	69.1145	0.542475	0.981056	0	0	0.430258	1	0.888801	-0.04962	0.546504	0	3.81087
ENSRNOG00000003332	Nt5m	5'(3')-deoxyribonucleotidase, mitochondrial [Source:RefSeq peptide;Acc:NP_001099255]	10	46.1748	46.2014	41.9925	42.0095	NA	NA	0	0	0.580016	1	0.904343	0.0331304	0.687332	0	2.36559
ENSRNOG00000003334	Klhl21	Kelch-like protein 21 [Source:UniProtKB/Swiss-Prot;Acc:D4A2K4]	5	169.236	169.246	111.156	111.166	0.405922	1.04106	0	0	0.551657	1	1.14972	-0.019016	0.817338	0	2.029
ENSRNOG00000003336	Mybph	myosin-binding protein H [Source:RefSeq peptide;Acc:NP_114001]	13	47.151	47.1587	13.3346	13.3421	NA	NA	0	0	0.886679	1	0.94531	0.13646	0.0958931	0	1.98267
ENSRNOG00000003338	Pmp22	Peripheral myelin protein 22 [Source:UniProtKB/Swiss-Prot;Acc:P25094]	10	49.3058	49.3359	43.9904	44.0096	0.267332	0.967512	0	0	0.22621	1	1.22515	-0.0740158	0.368037	0	3.73388
ENSRNOG00000003341	RGD1563669	mediator of RNA polymerase II transcription subunit 9 [Source:RefSeq peptide;Acc:NP_001120774]	10	46.2748	46.2904	42.0563	42.0663	0.147467	1.07174	0	0	0.540036	1	1.15269	-0.223336	0.00601052	0	2.73719
ENSRNOG00000003343	CALX_RAT	Calnexin [Source:UniProtKB/Swiss-Prot;Acc:P35565]	10	35.8509	35.8694	35.3226	35.3446	0.357205	1.01543	0	0	0.895927	1	0.969181	-0.0791058	0.335925	0	6.86241
ENSRNOG00000003346	D4A5I2_RAT	Fanconi anemia, complementation group B [Source:RefSeq peptide;Acc:NP_001178932]	X	50.1435	50.1579	NA	NA	NA	NA	0	0	1	1	0.92436	0.0458581	0.577364	0	0.678191
ENSRNOG00000003348	Rasd1	Dexamethasone-induced Ras-related protein 1 [Source:UniProtKB/Swiss-Prot;Acc:Q9JKF8]	10	46.2914	46.2931	42.0669	42.068	0.325334	1.03102	0	0	0.0349801	1	1.36848	-0.0862457	0.293989	0	3.5836
ENSRNOG00000003349	Col23a1	collagen alpha-1(XXIII) chain [Source:RefSeq peptide;Acc:NP_853667]	10	36.8087	37.0966	36.016	36.1997	NA	NA	0	0	6.91859579055166e-14	7.57464277788648e-10	0.226882	0.263265	0.00113404	0	2.02156
ENSRNOG00000003350	Mospd2	motile sperm domain-containing protein 2 [Source:RefSeq peptide;Acc:NP_001128060]	X	50.1602	50.2021	NA	NA	0.389164	1.09465	0	0	0.856984	1	0.999844	-0.0262821	0.749536	0	2.33819
ENSRNOG00000003355	E9PT93_RAT		13	69.9598	69.9957	31.4025	31.43	NA	NA	0	0	NA	NA	NA	0.277993	0.000572386	0	1.62064
ENSRNOG00000003357	Col3a1	Collagen alpha-1(III) chain [Source:UniProtKB/Swiss-Prot;Acc:P13941]	9	44.2816	44.3178	33.3743	33.4029	0.0237826	0.797962	0	0	0.00690982	0.98089	0.699563	0.0304387	0.711559	0	2.16593
ENSRNOG00000003359	Ogt	UDP-N-acetylglucosamine--peptide N-acetylglucosaminyltransferase 110 kDa subunit [Source:RefSeq peptide;Acc:NP_058803]	X	89.7214	89.7662	NA	NA	0.775417	1.0124	0	0	0.851492	1	0.950391	-0.0106298	0.897276	0	5.39143
ENSRNOG00000003363	Ercc4	NA	10	2.14477	2.17755	0	0	NA	NA	0	0	0.277137	1	1.16792	0.022545	0.784205	0	1.94236
ENSRNOG00000003365	Cadm3	Cell adhesion molecule 3 [Source:UniProtKB/Swiss-Prot;Acc:Q1WIM3]	13	89.5386	89.5699	44.7278	44.7503	0.927856	1.00708	0	0	0.783929	1	1.02541	-0.0788054	0.337769	0	6.9473
ENSRNOG00000003367	Tmem220	Protein Tmem220; Similar to RIKEN cDNA A730055C05 gene (Predicted), isoform CRA_a [Source:UniProtKB/TrEMBL;Acc:D4A2I6]	10	53.7265	53.735	46.8112	46.8166	NA	NA	0	0	0.826088	1	0.9553	0.0751679	0.360608	0	0.801053
ENSRNOG00000003368	Tspyl2	testis-specific Y-encoded-like protein 2 [Source:RefSeq peptide;Acc:NP_001178547]	X	41.8368	41.8422	NA	NA	0.626354	1.01317	0	0	0.608375	1	1.0342	0.0356336	0.665082	0	5.17115
ENSRNOG00000003374	Ccdc85a	coiled-coil domain-containing protein 85A [Source:RefSeq peptide;Acc:NP_001178482]	14	109.427	109.434	74	74	NA	NA	0	0	0.0890936	1	1.3419	0.125549	0.125806	0	2.80744
ENSRNOG00000003385	GLRX2_RAT	Glutaredoxin-2, mitochondrial [Source:UniProtKB/Swiss-Prot;Acc:Q6AXW1]	13	57.5678	57.576	22.3888	22.3947	0.746553	0.989455	0	0	0.942641	1	0.948902	-0.0447931	0.586245	0	5.41555
ENSRNOG00000003386	Hrnbp3	fox-1 homolog C [Source:RefSeq peptide;Acc:NP_001127970]	10	108.492	108.618	95.3	95.3	0.422665	1.25147	0	0	0.470171	1	1.0872	-0.00800214	0.922577	0	4.93853
ENSRNOG00000003387	Fdxr	NADPH:adrenodoxin oxidoreductase, mitochondrial [Source:UniProtKB/Swiss-Prot;Acc:P56522]	10	105.343	105.351	94.5112	94.5217	0.963206	0.996322	0	0	0.683562	1	0.932184	-0.00906352	0.912347	0	1.48615
ENSRNOG00000003392	Grsf1	G-rich RNA sequence binding factor 1 [Source:RefSeq peptide;Acc:NP_001094360]	14	20.9922	21.0086	14.0686	14.0801	0.307072	1.03602	0	0	0.586705	1	1.04904	-0.0443096	0.590298	0	4.96836
ENSRNOG00000003397	RGD1309906	Manganese-dependent ADP-ribose/CDP-alcohol diphosphatase [Source:UniProtKB/Swiss-Prot;Acc:Q5M886]	10	53.7388	53.7512	46.819	46.827	0.00473931	1.24502	0	0	0.186973	1	1.24969	-0.115787	0.158251	0	2.38111
ENSRNOG00000003398	Tomm40b	Mitochondrial import receptor subunit TOM40B [Source:UniProtKB/Swiss-Prot;Acc:A4F267]	13	87.1095	87.1122	42.9788	42.9808	NA	NA	0	0	0.649031	1	0.963536	-0.021377	0.795132	0	3.65866
ENSRNOG00000003399	Hnrph1	heterogeneous nuclear ribonucleoprotein H [Source:RefSeq peptide;Acc:NP_543172]	10	35.9209	35.9301	35.4059	35.4169	0.400119	1.02969	0	0	0.661438	1	1.01924	-0.0524059	0.524185	0	6.14952
ENSRNOG00000003400	Fmo4	Dimethylaniline monooxygenase [N-oxide-forming] 4 [Source:UniProtKB/Swiss-Prot;Acc:Q8K4B7]	13	78.4762	78.4945	37.0256	37.0373	NA	NA	0	0	0.808009	1	0.928387	-0.128984	0.115699	0	0.640007
ENSRNOG00000003401	D3ZT78_RAT	predicted gene 8225 [Source:MGI Symbol;Acc:MGI:3643826]	10	12.8078	12.8087	7.28642	7.28719	NA	NA	0	0	0.846705	1	1.07917	-0.0674377	0.412236	0	4.21181
ENSRNOG00000003402	Stx6	Syntaxin-6 [Source:UniProtKB/Swiss-Prot;Acc:Q63635]	13	70.1219	70.1694	31.5268	31.5632	0.465733	1.02208	0	0	0.609642	1	1.07156	0.00529446	0.94873	0	4.72194
ENSRNOG00000003403	Slc35f5	solute carrier family 35 member F5 [Source:RefSeq peptide;Acc:NP_001099420]	13	38.0571	38.0932	4.79712	4.81639	0.140957	1.13095	0	0	0.73992	1	1.02672	-0.102751	0.210851	0	2.39429
ENSRNOG00000003407	Ptpn14	tyrosine-protein phosphatase non-receptor type 14 [Source:RefSeq peptide;Acc:NP_001100670]	13	106.005	106.15	53.7	53.7	NA	NA	0	0	0.0560038	1	0.749552	0.0775288	0.345677	0	1.01536
ENSRNOG00000003419	Bcas3	breast carcinoma amplified sequence 3 [Source:RefSeq peptide;Acc:NP_001166901]	10	73.6176	73.8435	61.5958	61.7685	0.00885083	0.905908	0	0	0.857151	1	1.00752	0.0214552	0.794399	0	3.41398
ENSRNOG00000003424	Elac2	zinc phosphodiesterase ELAC protein 2 [Source:RefSeq peptide;Acc:NP_758829]	10	51.2903	51.3131	45.2567	45.2712	0.54862	0.947116	0	0	0.975698	1	0.994093	0.0634375	0.440573	0	2.99627
ENSRNOG00000003426	D3ZSP6_RAT	lysine (K)-specific demethylase 5C [Source:MGI Symbol;Acc:MGI:99781]	X	41.7431	41.778	NA	NA	NA	NA	0	0	0.804162	1	1.06191	0.0698076	0.395965	0	3.22286
ENSRNOG00000003428	Rufy3	Protein RUFY3 [Source:UniProtKB/Swiss-Prot;Acc:Q5FVJ0]	14	21.0116	21.0866	14.0823	14.135	0.690647	1.05172	0	0	0.737151	1	1.02013	0.213739	0.00863222	0	5.39123
ENSRNOG00000003434	Trove2	60 kDa SS-A/Ro ribonucleoprotein [Source:RefSeq peptide;Acc:NP_001100653]	13	57.5847	57.6056	22.401	22.4161	0.324685	0.924842	0	0	0.53611	1	1.02677	-0.00267034	0.974128	0	2.81639
ENSRNOG00000003435	Mcf2	mcf.2 transforming sequence [Source:MGI Symbol;Acc:MGI:96932]	X	145.595	145.648	NA	NA	NA	NA	0	0	0.464168	1	1.1277	0.1471	0.0724447	0	1.25246
ENSRNOG00000003442	Adora1	Adenosine receptor A1 [Source:UniProtKB/Swiss-Prot;Acc:P25099]	13	47.159	47.1932	13.3425	13.3761	0.400008	0.956601	0	0	0.582576	1	1.07628	0.0597449	0.467685	0	4.99032
ENSRNOG00000003453	Lypd1	Ly6/PLAUR domain-containing protein 1 [Source:UniProtKB/Swiss-Prot;Acc:Q66H42]	13	38.3994	38.4415	4.9797	5.00213	NA	NA	0	0	0.254451	1	1.23224	0.0538069	0.513139	0	4.53934
ENSRNOG00000003455	Zfp13	zinc finger protein 13 [Source:RefSeq peptide;Acc:NP_001099235]	10	12.8469	12.855	7.3188	7.32553	NA	NA	0	0	0.976325	1	0.984314	0.0193947	0.813766	0	1.94272
ENSRNOG00000003461	Zfp330	zinc finger protein 330 [Source:RefSeq peptide;Acc:NP_001101913]	19	27.0486	27.0599	17.083	17.1023	0.762534	1.00774	0	0	0.552985	1	0.904542	-0.0205414	0.802973	0	3.75467
ENSRNOG00000003463	Srebf1	Sterol regulatory element-binding protein 1 Processed sterol regulatory element-binding protein 1 [Source:UniProtKB/Swiss-Prot;Acc:P56720]	10	46.4622	46.4836	42.1759	42.1895	0.24617	0.919925	0	0	0.995879	1	1.0372	0.0944327	0.250368	0	3.36928
ENSRNOG00000003464	D4A0C3_RAT	Protein RGD1311422 [Source:UniProtKB/TrEMBL;Acc:D4A0C3]	10	105.425	105.445	94.6106	94.6343	0.246533	1.13632	0	0	0.55824	1	1.11827	-0.124342	0.129515	0	4.62303
ENSRNOG00000003466	D4A4I4_RAT	IQ motif and Sec7 domain 2 [Source:MGI Symbol;Acc:MGI:3528396]	X	41.6513	41.8362	NA	NA	NA	NA	0	0	0.710308	1	1.01111	0.108464	0.186438	0	4.5242
ENSRNOG00000003469	MAST1	Microtubule-associated serine/threonine-protein kinase 1 [Source:UniProtKB/Swiss-Prot;Acc:Q810W7]	19	24.8727	24.9004	16.1916	16.2022	0.63995	1.01998	0	0	0.603948	1	1.11263	0.142499	0.0819404	0	3.85608
ENSRNOG00000003470	Fundc1	FUN14 domain-containing protein 1 [Source:UniProtKB/Swiss-Prot;Acc:Q5BJS4]	X	16.6728	16.6895	NA	NA	0.138205	1.11539	0	0	0.736289	1	0.921457	0.142053	0.0829122	0	3.64253
ENSRNOG00000003472	Atp11c-ps1		X	145.746	145.85	NA	NA	NA	NA	0	0	0.393521	1	1.16458	0.0644669	0.433177	0	2.1413
ENSRNOG00000003475	Rmnd5b	NA	10	37.1415	37.1524	36.2284	36.2354	0.104499	0.903339	0	0	0.812356	1	1.00826	-0.0852661	0.299528	0	3.31308
ENSRNOG00000003476	Slc6a4	Sodium-dependent serotonin transporter [Source:UniProtKB/Swiss-Prot;Acc:P31652]	10	67.1348	67.1559	56.643	56.6591	NA	NA	0	0	1	1	1.20142	-0.00939065	0.909197	0	1.15864
ENSRNOG00000003479	Rnf150	RING finger protein 150 precursor [Source:RefSeq peptide;Acc:NP_001178022]	19	26.7847	26.9627	16.9182	16.9858	NA	NA	0	0	0.950066	1	1.02563	0.0499489	0.543845	0	3.09604
ENSRNOG00000003491	Prkca	protein kinase C alpha type [Source:RefSeq peptide;Acc:NP_001099183]	10	97.3674	97.6181	84.9409	85.2418	0.339003	1.18101	0	0	0.513793	1	0.911823	-0.106618	0.194088	0	4.56734
ENSRNOG00000003492	Gas7	NA	10	54.3185	54.3995	47.189	47.2407	NA	NA	0	0	0.63294	1	0.93566	-0.0692938	0.39946	0	5.72978
ENSRNOG00000003493	Prp2l1		10	92.7645	92.7773	79.4174	79.4328	NA	NA	0	0	0.381283	1	1.23187	-0.0260083	0.75206	0	1.5951
ENSRNOG00000003494	Ppfia4	liprin-alpha-4 [Source:RefSeq peptide;Acc:NP_536334]	13	47.2528	47.288	13.4349	13.4696	NA	NA	0	0	1	1	1.08496	0.165656	0.0427746	0	3.1346
ENSRNOG00000003495	Prpf8	pre-mRNA-processing-splicing factor 8 [Source:RefSeq peptide;Acc:NP_001178519]	10	62.8079	62.8309	53.3372	53.3548	0.0271404	0.950627	0	0	0.604278	1	0.945482	0.00309703	0.969996	0	4.76377
ENSRNOG00000003496	Tbc1d9	TBC1 domain family member 9 [Source:RefSeq peptide;Acc:NP_001128011]	19	26.5715	26.6725	16.8372	16.8755	0.0738173	0.93537	0	0	0.704375	1	0.962412	-0.084987	0.301118	0	3.99505
ENSRNOG00000003497	Thoc6	THO complex subunit 6 homolog [Source:UniProtKB/Swiss-Prot;Acc:Q6AY87]	10	12.9333	12.9387	7.39028	7.39471	0.252951	1.07956	0	0	0.292797	1	1.28816	0.0586195	0.476126	0	2.07133
ENSRNOG00000003504	Rnaseh2a	Ribonuclease H2 subunit A [Source:UniProtKB/Swiss-Prot;Acc:Q5U209]	19	24.8416	24.8518	16.1798	16.1837	0.559279	1.05038	0	0	0.679548	1	1.09224	-0.00452998	0.956125	0	3.23336
ENSRNOG00000003505	D3ZSJ9_RAT	NA	X	144.614	144.614	NA	NA	NA	NA	0	0	0.998745	1	0.932731	0.0283622	0.730449	0	2.54105
ENSRNOG00000003506	Gosr2	Golgi SNAP receptor complex member 2 [Source:UniProtKB/Swiss-Prot;Acc:O35165]	10	92.831	92.8503	79.4972	79.5203	0.827711	1.01062	0	0	0.537329	1	0.949068	0.00656919	0.936409	0	4.49598
ENSRNOG00000003508	LOC100364400	Protein Ergic1 [Source:UniProtKB/TrEMBL;Acc:F1LU48]	10	16.7956	16.8397	11.4669	11.525	NA	NA	0	0	0.535216	1	1.16409	-0.0237184	0.77327	0	4.70313
ENSRNOG00000003510	Fmo2	dimethylaniline monooxygenase [Source:RefSeq peptide;Acc:NP_653338]	13	78.5463	78.5929	37.0708	37.1009	NA	NA	0	0	0.0192672	1	0.466378	0.184044	0.0241644	0	1.41675
ENSRNOG00000003512	Gabra1	Gamma-aminobutyric acid receptor subunit alpha-1 [Source:UniProtKB/Swiss-Prot;Acc:P62813]	10	27.2588	27.3137	25.098	25.1633	0.321935	0.981662	0	0	1	1	0.931221	-0.139311	0.0890868	0	6.74507
ENSRNOG00000003515	Ephx1	Epoxide hydrolase 1 [Source:UniProtKB/Swiss-Prot;Acc:P07687]	13	96.723	96.799	49.9005	49.9553	NA	NA	0	0	0.745855	1	1.01109	-0.0588418	0.474453	0	2.94701
ENSRNOG00000003520	Prdx2	Peroxiredoxin-2 [Source:UniProtKB/Swiss-Prot;Acc:P35704]	19	24.8362	24.8414	16.1778	16.1797	0.759125	1.00953	0	0	0.839979	1	0.991998	-0.15907	0.0518585	0	6.89495
ENSRNOG00000003522	Mr1	Major histocompatibility complex class I-related gene protein [Source:UniProtKB/Swiss-Prot;Acc:O19477]	13	70.0896	70.1074	31.5021	31.5157	NA	NA	0	0	0.474348	1	0.809861	0.0106298	0.897276	0	0.707149
ENSRNOG00000003523	D4ACJ2_RAT	NA	X	144.492	144.533	NA	NA	NA	NA	0	0	0.417232	1	0.890334	0.0929269	0.258036	0	4.59075
ENSRNOG00000003524	Lrrc59	Leucine-rich repeat-containing protein 59 [Source:UniProtKB/Swiss-Prot;Acc:Q5RJR8]	10	83.2643	83.2788	69.1378	69.1509	0.227126	0.938734	0	0	0.835598	1	1.01831	-0.0214659	0.794299	0	4.62518
ENSRNOG00000003526	Sytl4	synaptotagmin-like protein 4 [Source:RefSeq peptide;Acc:NP_536335]	X	121.473	121.499	NA	NA	NA	NA	0	0	0.542155	1	0.846642	0.128189	0.11798	0	0.72488
ENSRNOG00000003533	Clcn4-2	H(+)/Cl(-) exchange transporter 4 [Source:RefSeq peptide;Acc:NP_071534]	X	44.3556	44.4195	NA	NA	0.602246	0.967192	0	0	0.515208	1	0.890363	0.0238429	0.772113	0	4.60826
ENSRNOG00000003536	Rufy1	RUN and FYVE domain containing 1 [Source:RefSeq peptide;Acc:NP_001094197]	10	35.9334	35.978	35.4207	35.4738	NA	NA	0	0	0.684563	1	1.04761	-0.0268048	0.744725	0	3.12347
ENSRNOG00000003538	D4A0C5_RAT	A disintegrin and metalloproteinase with thrombospondin motifs 4 [Source:RefSeq peptide;Acc:NP_076449]	13	87.1424	87.151	43.0026	43.0087	NA	NA	0	0	0.715906	1	0.99742	-0.0614712	0.454898	0	2.15147
ENSRNOG00000003541	Pggt1b	Geranylgeranyl transferase type-1 subunit beta [Source:UniProtKB/Swiss-Prot;Acc:P53610]	18	40.4101	40.4529	20.2376	20.2487	0.0349736	0.794054	0	0	0.322433	1	0.827079	0.0726344	0.377068	0	2.89118
ENSRNOG00000003542	Hcfc1r1	Host cell factor C1 regulator 1 [Source:UniProtKB/Swiss-Prot;Acc:Q80V38]	10	12.9389	12.9401	7.39487	7.3959	0.438894	0.965812	0	0	0.969669	1	1.00853	0.0274164	0.739109	0	6.35518
ENSRNOG00000003545	Uchl5	ubiquitin carboxyl-terminal hydrolase isozyme L5 [Source:RefSeq peptide;Acc:NP_001012149]	13	57.6059	57.643	22.4163	22.443	0.0464258	0.923733	0	0	0.783351	1	0.953456	-0.00593449	0.942542	0	3.58776
ENSRNOG00000003546	Tnfrsf12a	tumor necrosis factor receptor superfamily member 12A precursor [Source:RefSeq peptide;Acc:NP_851600]	10	12.9403	12.9423	7.39609	7.39776	0.111859	1.09648	0	0	0.220671	1	1.54691	0.000778702	0.992454	0	1.34671
ENSRNOG00000003549	Cnpy2	protein canopy homolog 2 precursor [Source:RefSeq peptide;Acc:NP_001071053]	7	1.61127	1.61587	0	0	0.310467	0.957544	0	0	0.822213	1	0.983109	0.0287409	0.726992	0	4.26344
ENSRNOG00000003550	Acbd6	Acyl-CoA-binding domain-containing protein 6 [Source:UniProtKB/Swiss-Prot;Acc:Q5RJK8]	13	70.5194	70.655	31.8315	31.9355	0.0624717	1.0902	0	0	0.439278	1	1.09714	-0.197959	0.01517	0	3.36739
ENSRNOG00000003551	B4galt3	Beta-1,4-galactosyltransferase 3 N-acetyllactosamine synthase Beta-N-acetylglucosaminylglycopeptide beta-1,4-galactosyltransferase Beta-N-acetylglucosaminyl-glycolipid beta-1,4-galactosyltransferase [Source:UniProtKB/Swiss-Prot;Acc:Q6P768]	13	87.1644	87.1704	43.0184	43.0227	0.470869	1.03241	0	0	0.793436	1	1.06614	-0.190227	0.0197196	0	3.6039
ENSRNOG00000003553	Efemp1	EGF-containing fibulin-like extracellular matrix protein 1 precursor [Source:RefSeq peptide;Acc:NP_001012039]	14	109.735	109.829	74	74	0.366502	0.938926	0	0	0.0973893	1	0.798406	0.0725544	0.377595	0	2.31584
ENSRNOG00000003554	Piga	N-acetylglucosaminyl-phosphatidylinositol biosynthetic protein [Source:RefSeq peptide;Acc:NP_001102286]	X	50.7988	50.8122	NA	NA	NA	NA	0	0	0.901175	1	0.985897	0.22052	0.00669427	0	2.76433
ENSRNOG00000003559	Ccdc112	coiled-coil domain-containing protein 112 precursor [Source:RefSeq peptide;Acc:NP_001102594]	18	40.4555	40.4897	20.2494	20.2583	NA	NA	0	0	0.475428	1	1.1234	0.035879	0.662916	0	2.3799
ENSRNOG00000003562	Susd4	sushi domain-containing protein 4 [Source:RefSeq peptide;Acc:NP_001099452]	13	98.8311	98.9509	51.4184	51.5047	NA	NA	0	0	0.564498	1	0.94369	-0.172068	0.035248	0	4.54469
ENSRNOG00000003563	Blmh	Bleomycin hydrolase [Source:UniProtKB/Swiss-Prot;Acc:P70645]	10	67.1953	67.2384	56.6892	56.7221	0.165607	0.930124	0	0	0.787091	1	0.979842	0.143358	0.0800961	0	3.35146
ENSRNOG00000003567	Ppox	protoporphyrinogen oxidase [Source:RefSeq peptide;Acc:NP_001099438]	13	87.1706	87.1747	43.0228	43.0258	NA	NA	0	0	0.619678	1	1.00299	0.102159	0.213506	0	1.70659
ENSRNOG00000003572	Adamts2	A disintegrin and metalloproteinase with thrombospondin motifs 2 precursor [Source:RefSeq peptide;Acc:NP_001131094]	10	36.1687	36.3776	35.6076	35.741	NA	NA	0	0	0.564215	1	1.18882	0.0767324	0.35067	0	1.56748
ENSRNOG00000003574	F1M0X1_RAT	NA	13	90.3053	90.5203	45.2798	45.4346	NA	NA	0	0	0.74923	1	1.04214	0.0284297	0.729832	0	3.44922
ENSRNOG00000003576	Ints2	integrator complex subunit 2 [Source:RefSeq peptide;Acc:NP_001094100]	10	74.4398	74.486	62.224	62.2593	NA	NA	0	0	0.847403	1	0.970858	0.0573306	0.485895	0	2.06357
ENSRNOG00000003578	Fem1c	protein fem-1 homolog C [Source:RefSeq peptide;Acc:NP_001100402]	18	40.7154	40.7404	20.3168	20.3233	0.521615	1.02916	0	0	0.78503	1	0.995159	-0.0509961	0.535422	0	2.79911
ENSRNOG00000003581	Pou2f1	POU domain, class 2, transcription factor 1 [Source:UniProtKB/Swiss-Prot;Acc:P31503]	13	81.6073	81.74	39.0466	39.1322	0.219263	1.13048	0	0	0.830709	1	1.03819	0.044882	0.585501	0	1.51905
ENSRNOG00000003583	Smyd2	N-lysine methyltransferase SMYD2 [Source:UniProtKB/Swiss-Prot;Acc:Q7M6Z3]	13	106.16	106.201	53.7	53.7	0.76603	1.00879	0	0	0.612683	1	1.08685	0.0199102	0.808909	0	4.82677
ENSRNOG00000003585	Sytl5	synaptotagmin-like protein 5 [Source:RefSeq peptide;Acc:NP_848016]	X	24.9454	25.034	NA	NA	NA	NA	0	0	0.157736	1	1.34943	-0.0167261	0.839016	0	1.28716
ENSRNOG00000003590	Tom1l2	TOM1-like protein 2 [Source:RefSeq peptide;Acc:NP_001101747]	10	46.4931	46.6129	42.1956	42.272	NA	NA	0	0	0.894873	1	0.986294	-0.123654	0.131666	0	5.57723
ENSRNOG00000003592	Med28	Mediator of RNA polymerase II transcription subunit 28 [Source:UniProtKB/Swiss-Prot;Acc:P68943]	14	70.6665	70.6753	42.7777	42.7835	0.494804	1.0178	0	0	0.839801	1	1.0134	-0.0711783	0.386732	0	3.32143
ENSRNOG00000003594	Tmem183a	Transmembrane protein 183 [Source:UniProtKB/Swiss-Prot;Acc:Q68FS7]	13	47.3036	47.3188	13.485	13.5	0.413604	1.04459	0	0	0.895621	1	0.991738	-0.105706	0.197951	0	4.87972
ENSRNOG00000003597	Tuba4a	Tubulin alpha-4A chain [Source:UniProtKB/Swiss-Prot;Acc:Q5XIF6]	9	74.4965	74.5002	57.2239	57.2268	0.0196081	0.911532	0	0	0.741815	1	0.963228	-0.189859	0.0199628	0	7.52984
ENSRNOG00000003599	Utp3	Something about silencing protein 10 [Source:UniProtKB/Swiss-Prot;Acc:Q6AXX4]	14	21.096	21.0974	14.1416	14.1426	0.415125	0.958141	0	0	0.81637	1	0.977279	-0.0993503	0.226431	0	3.38875
ENSRNOG00000003600	Pnpt1	polyribonucleotide nucleotidyltransferase 1, mitochondrial [Source:RefSeq peptide;Acc:NP_001135843]	14	110.13	110.162	74	74	0.207654	1.05826	0	0	0.552171	1	1.10098	0.0681222	0.407497	0	2.57638
ENSRNOG00000003603	RGD1305664	Protein RGD1305664 [Source:UniProtKB/TrEMBL;Acc:F1LQX4]	10	51.3135	51.3883	45.2715	45.3192	0.82901	0.992681	0	0	0.915583	1	1.02399	-0.0621948	0.449596	0	5.02888
ENSRNOG00000003606	RGD1561381	Protein RGD1561381 [Source:UniProtKB/TrEMBL;Acc:D3ZZQ8]	14	21.1058	21.1064	14.1485	14.1489	NA	NA	0	0	0.627847	1	1.10914	-0.0585022	0.477011	0	2.43841
ENSRNOG00000003611	Dynlt3	dynein light chain Tctex-type 3 [Source:RefSeq peptide;Acc:NP_001013246]	X	25.4809	25.4905	NA	NA	0.490763	1.01608	0	0	1	1	0.938807	-0.0910477	0.267829	0	5.33246
ENSRNOG00000003612	Axin2	Axin-2 [Source:UniProtKB/Swiss-Prot;Acc:O70240]	10	98.2945	98.3218	86.0534	86.0862	0.700678	1.03248	0	0	0.508837	1	1.125	-0.0611334	0.457384	0	2.19211
ENSRNOG00000003613	TRI18_RAT	Midline-1 [Source:UniProtKB/Swiss-Prot;Acc:P82458]	X	44.752	44.88	NA	NA	NA	NA	0	0	0.799977	1	0.897833	-0.0158052	0.847769	0	1.38344
ENSRNOG00000003614	Mgat5	Alpha-1,6-mannosylglycoprotein 6-beta-N-acetylglucosaminyltransferase A [Source:UniProtKB/Swiss-Prot;Acc:Q08834]	13	39.8331	40.135	6.12115	6.41879	NA	NA	0	0	0.272812	1	1.1275	-0.071797	0.382608	0	3.73894
ENSRNOG00000003616	Grem2	gremlin-2 precursor [Source:RefSeq peptide;Acc:NP_001099444]	13	90.5289	90.6223	45.4408	45.5081	0.314613	1.04435	0	0	0.172642	1	1.14322	0.0232242	0.77787	0	3.08216
ENSRNOG00000003620	Fmo3	Dimethylaniline monooxygenase [N-oxide-forming] 3 [Source:UniProtKB/Swiss-Prot;Acc:Q9EQ76]	13	78.6595	78.6785	37.1439	37.1561	NA	NA	0	0	0.909081	1	1.24752	0.159877	0.0506657	0	0.694832
ENSRNOG00000003625	Ubxn4	UBX domain-containing protein 4 [Source:UniProtKB/Swiss-Prot;Acc:Q5HZY0]	13	40.9482	40.9805	7.22042	7.25216	0.927847	0.99668	0	0	0.498008	1	1.03521	-0.093926	0.25293	0	4.5479
ENSRNOG00000003626	Atp5h	ATP synthase subunit d, mitochondrial [Source:UniProtKB/TrEMBL;Acc:D3ZWT8]	10	105.494	105.499	94.6933	94.6993	NA	NA	0	0	0.863588	1	1.03147	-0.123111	0.133381	0	6.7833
ENSRNOG00000003629	Nvl	nuclear valosin-containing protein-like [Source:RefSeq peptide;Acc:NP_001099450]	13	96.8628	96.9172	50.0012	50.0404	0.110809	0.889167	0	0	0.504147	1	1.05862	-0.0610748	0.457817	0	1.91625
ENSRNOG00000003634	Zfp354a	Zinc finger protein 354A [Source:UniProtKB/Swiss-Prot;Acc:Q02975]	10	36.6546	36.6657	35.9177	35.9248	0.162344	1.07322	0	0	0.874262	1	0.854769	0.0780444	0.342469	0	1.76263
ENSRNOG00000003635	Disp1	protein dispatched homolog 1 [Source:RefSeq peptide;Acc:NP_001099453]	13	99.0957	99.2423	51.6089	51.7144	NA	NA	0	0	0.330788	1	0.891378	-0.0348229	0.672257	0	1.17974
ENSRNOG00000003641		NA	10	51.4806	51.4812	45.3781	45.3785	NA	NA	0	0	0.247629	1	1.45988	0.0505712	0.538832	0	0.973371
ENSRNOG00000003643	F1M1D2_RAT	TGF-beta activated kinase 1/MAP3K7 binding protein 3 [Source:MGI Symbol;Acc:MGI:1913974]	X	72.2709	72.2873	NA	NA	NA	NA	0	0	0.877285	1	0.947741	0.110938	0.176528	0	1.86963
ENSRNOG00000003645	Hnrnpab	heterogeneous nuclear ribonucleoprotein A/B [Source:RefSeq peptide;Acc:NP_112620]	10	37.1173	37.1232	36.2129	36.2167	0.284786	1.03112	0	0	0.239108	1	1.1304	0.162806	0.0465277	0	5.51365
ENSRNOG00000003649	Qsox1	Sulfhydryl oxidase 1 [Source:UniProtKB/Swiss-Prot;Acc:Q6IUU3]	13	70.7398	70.7775	32.0005	32.0295	0.316934	0.954428	0	0	0.688983	1	1.10766	0.0241487	0.769271	0	3.12039
ENSRNOG00000003650	LOC100360582	5',3'-nucleotidase, cytosolic [Source:MGI Symbol;Acc:MGI:1354954]	10	105.575	105.577	94.7897	94.7922	NA	NA	0	0	0.979906	1	1.00871	-0.0221752	0.78766	0	0.704556
ENSRNOG00000003653	Fh1	fumarate hydratase, mitochondrial precursor [Source:RefSeq peptide;Acc:NP_058701]	13	91.3298	91.3557	46.0175	46.0361	0.0666845	0.942774	0	0	0.595297	1	0.931801	-0.0101622	0.901772	0	4.0892
ENSRNOG00000003654	Cldn9	claudin-9 [Source:RefSeq peptide;Acc:NP_001011889]	10	12.9478	12.9485	7.4023	7.40284	NA	NA	0	0	1	1	0.93967	0.0659159	0.422889	0	0.742093
ENSRNOG00000003661	Hn1	Hematological and neurological expressed 1 protein [Source:UniProtKB/Swiss-Prot;Acc:Q6AXU6]	10	105.58	105.598	94.7959	94.8177	5.40839034673296e-06	2.03271	1	1	0.00309049	0.685804	1.47613	-0.00397351	0.96151	0	4.60924
ENSRNOG00000003664	RGD1307161	BRO1 domain-containing protein BROX [Source:UniProtKB/Swiss-Prot;Acc:Q4V8K5]	13	99.3195	99.3393	51.77	51.7843	0.168258	0.958172	0	0	0.672859	1	0.929714	-0.0686236	0.404046	0	3.99823
ENSRNOG00000003666	Igj	immunoglobulin joining chain [Source:MGI Symbol;Acc:MGI:96493]	14	21.1192	21.1266	14.158	14.1632	NA	NA	0	0	0.643378	1	1.02214	-0.0998641	0.224027	0	0.616111
ENSRNOG00000003667	DMD_RAT		X	69.8059	71.6714	NA	NA	NA	NA	0	0	1	1	0.93119	-0.131894	0.107641	0	3.55642
ENSRNOG00000003670	F1M2K3_RAT	Uncharacterized protein [Source:UniProtKB/TrEMBL;Acc:F1M2K3]	10	105.608	105.62	94.8297	94.8442	NA	NA	0	0	0.981454	1	0.937771	-0.136212	0.0965019	0	6.86377
ENSRNOG00000003673	Nup85	Nuclear pore complex protein Nup85 [Source:UniProtKB/Swiss-Prot;Acc:Q4QQS8]	10	105.646	105.665	94.8746	94.8981	0.0225799	0.87961	0	0	0.175867	1	0.81438	0.116133	0.157001	0	2.52795
ENSRNOG00000003674	Pir	Pirin [Source:UniProtKB/Swiss-Prot;Acc:Q5M827]	X	50.865	50.9749	NA	NA	0.0799286	1.16559	0	0	0.342416	1	1.22419	-0.000853372	0.991731	0	2.16714
ENSRNOG00000003675	Ptchd1	patched domain-containing protein 1 [Source:RefSeq peptide;Acc:NP_001178663]	X	61.0797	61.1312	NA	NA	NA	NA	0	0	0.44482	1	0.987818	0.0240153	0.77051	0	1.96512
ENSRNOG00000003679	Med13	mediator of RNA polymerase II transcription subunit 13 [Source:RefSeq peptide;Acc:NP_001100505]	10	74.4983	74.5841	62.2687	62.3343	0.0172825	1.06624	0	0	0.750792	1	1.00622	-0.0373617	0.649889	0	3.45248
ENSRNOG00000003680	Gabrb2	Gamma-aminobutyric acid receptor subunit beta-2 [Source:UniProtKB/Swiss-Prot;Acc:P63138]	10	27.6021	27.8191	25.5065	25.7648	NA	NA	0	0	0.436425	1	0.857617	-0.0183493	0.823636	0	4.88473
ENSRNOG00000003682	D4ACS1_RAT	hook homolog 2 [Source:RefSeq peptide;Acc:NP_001094032]	19	24.8086	24.8194	16.1672	16.1714	NA	NA	0	0	0.938462	1	0.964726	-0.0421921	0.608195	0	1.42776
ENSRNOG00000003686	Tbl1x	F-box-like/WD repeat-containing protein TBL1X [Source:RefSeq peptide;Acc:NP_001100434]	X	63.3106	63.3925	NA	NA	0.504634	1.0354	0	0	0.593351	1	0.931859	-0.0557928	0.497689	0	3.73746
ENSRNOG00000003687	Rgs2	Regulator of G-protein signaling 2 [Source:UniProtKB/Swiss-Prot;Acc:Q9JHX0]	13	57.8909	57.8945	22.6215	22.624	0.342078	1.05104	0	0	0.638738	1	1.03239	-0.119636	0.144781	0	4.17424
ENSRNOG00000003689	Nono	Non-POU domain-containing octamer-binding protein [Source:UniProtKB/Swiss-Prot;Acc:Q5FVM4]	X	89.5023	89.5202	NA	NA	0.117753	0.946583	0	0	0.951851	1	1.01829	-0.0450403	0.584178	0	5.33983
ENSRNOG00000003691	Tmed7	Transmembrane emp24 domain-containing protein 7 [Source:UniProtKB/Swiss-Prot;Acc:D3ZTX0]	18	40.8009	40.808	20.339	20.3408	0.068318	1.05685	0	0	0.633747	1	1.03378	0.06958	0.397511	0	4.75415
ENSRNOG00000003694	Prox1	prospero homeobox protein 1 [Source:RefSeq peptide;Acc:NP_001100671]	13	106.422	106.471	53.7	53.7	NA	NA	0	0	0.794216	1	0.985536	0.124528	0.128936	0	1.8968
ENSRNOG00000003696	Prkx	serine/threonine-protein kinase PRKX [Source:RefSeq peptide;Acc:NP_001029135]	X	63.4846	63.5339	NA	NA	0.164776	1.03389	0	0	0.926353	1	0.965637	-0.0610819	0.457765	0	1.7443
ENSRNOG00000003699	Q5M841_RAT	endonuclease V [Source:MGI Symbol;Acc:MGI:2444688]	10	108.867	108.883	95.3	95.3	NA	NA	0	0	0.595268	1	1.10259	0.124246	0.129813	0	1.82328
ENSRNOG00000003703	Mcm6	DNA replication licensing factor MCM6 [Source:RefSeq peptide;Acc:NP_058983]	13	41.0457	41.0709	7.31645	7.34128	NA	NA	0	0	0.582168	1	0.916771	0.0476911	0.562227	0	1.15236
ENSRNOG00000003704	Fam184b	Protein Fam184b [Source:UniProtKB/TrEMBL;Acc:D3ZTZ0]	14	70.5451	70.6622	42.6967	42.7748	NA	NA	0	0	0.297501	1	0.812493	0.0262376	0.749946	0	1.1848
ENSRNOG00000003706	Ufc1	Ubiquitin-fold modifier-conjugating enzyme 1 [Source:UniProtKB/Swiss-Prot;Acc:Q6BBI8]	13	87.1816	87.1883	43.0308	43.0356	0.0606997	0.953755	0	0	0.872443	1	0.963371	0.063066	0.44326	0	4.36073
ENSRNOG00000003707	Zmym3	zinc finger MYM-type protein 3 [Source:RefSeq peptide;Acc:NP_001035245]	X	89.4766	89.4914	NA	NA	NA	NA	0	0	0.745897	1	0.988307	0.0727482	0.376319	0	4.15228
ENSRNOG00000003712	Smek2	serine/threonine-protein phosphatase 4 regulatory subunit 3B [Source:RefSeq peptide;Acc:NP_001101837]	14	110.17	110.219	74	74	0.872071	1.00871	0	0	0.523363	1	1.02542	0.0265203	0.747342	0	3.76757
ENSRNOG00000003714	Clk4	CDC-like kinase 4 [Source:RefSeq peptide;Acc:NP_001013059]	10	36.7828	36.8004	35.9995	36.0107	NA	NA	0	0	0.840621	1	0.926612	-0.213533	0.00869824	0	3.82913
ENSRNOG00000003717	Cnih4	protein cornichon homolog 4 [Source:RefSeq peptide;Acc:NP_001099451]	13	96.9215	96.9404	50.0435	50.0571	0.567757	1.06039	0	0	0.755206	1	0.887384	-0.0463559	0.573234	0	2.89309
ENSRNOG00000003719	Atpaf2	ATP synthase mitochondrial F1 complex assembly factor 2 [Source:RefSeq peptide;Acc:NP_001100476]	10	46.669	46.6843	42.3078	42.3176	0.0593629	0.790781	0	0	0.632121	1	0.995173	0.0820162	0.318392	0	2.70427
ENSRNOG00000003720	Prrx1	Paired mesoderm homeobox protein 1 [Source:UniProtKB/Swiss-Prot;Acc:P63014]	13	78.9616	79.0289	37.3389	37.3823	NA	NA	0	0	0.691995	1	1.03903	0.0664528	0.419112	0	2.25251
ENSRNOG00000003721	Paqr4	progestin and adipoQ receptor family member 4 [Source:RefSeq peptide;Acc:NP_001017377]	10	12.9937	12.9973	7.44023	7.44322	0.106318	1.21985	0	0	0.0193161	1	1.42813	-0.0263141	0.749241	0	3.86499
ENSRNOG00000003723	Wdr26	WD repeat-containing protein 26 [Source:RefSeq peptide;Acc:NP_001102551]	13	96.9443	96.9864	50.0599	50.0902	0.717188	0.991912	0	0	0.895354	1	0.957698	-0.0126904	0.877507	0	4.30786
ENSRNOG00000003724	Mrpl27	39S ribosomal protein L27, mitochondrial [Source:RefSeq peptide;Acc:NP_001099301]	10	83.2874	83.2931	69.1586	69.1638	0.913405	0.997708	0	0	0.920183	1	0.993467	-0.146424	0.0737803	0	3.87031
ENSRNOG00000003728	Xylt2	xylosyltransferase 2 [Source:RefSeq peptide;Acc:NP_071632]	10	83.2978	83.3113	69.168	69.1802	0.962662	0.998708	0	0	0.810516	1	1.04594	-0.00644296	0.937629	0	2.47454
ENSRNOG00000003729	D3ZDC1_RAT		10	46.7188	46.7323	42.3396	42.3482	NA	NA	0	0	0.516928	1	0.915882	-0.157275	0.0545958	0	3.79734
ENSRNOG00000003730	LOC682999	axin interactor, dorsalization-associated protein [Source:RefSeq peptide;Acc:NP_001121072]	13	99.3397	99.3577	51.7846	51.7975	NA	NA	0	0	0.476781	1	1.12601	0.0455007	0.580337	0	2.74216
ENSRNOG00000003732	Flrt2	leucine-rich repeat transmembrane protein FLRT2 precursor [Source:RefSeq peptide;Acc:NP_001100220]	6	119.569	119.659	77.4465	77.525	NA	NA	0	0	0.746643	1	1.00506	-0.155627	0.057212	0	3.30529
ENSRNOG00000003734		CXXC-type zinc finger protein 5 [Source:RefSeq peptide;Acc:NP_001007629]	X	134.065	134.067	NA	NA	NA	NA	0	0	0.567567	1	1.13243	-0.0412712	0.616053	0	1.2587
ENSRNOG00000003736	Col5a2	collagen, type V, alpha 2 precursor [Source:RefSeq peptide;Acc:NP_445940]	9	44.3753	44.4403	33.4482	33.4996	0.301673	1.13274	0	0	0.170635	1	0.885971	-0.0407325	0.62067	0	2.10109
ENSRNOG00000003741	Nptx1	Neuronal pentraxin-1 [Source:UniProtKB/Swiss-Prot;Acc:P47971]	10	108.922	108.927	95.3	95.3	NA	NA	0	0	0.226173	1	1.26879	-0.171037	0.0363768	0	5.58198
ENSRNOG00000003742	LOC100364794	Cyclin-dependent kinase-like 5 [Source:UniProtKB/TrEMBL;Acc:E1U7Q0]	X	55.0335	55.2285	NA	NA	NA	NA	0	0	0.893519	1	0.914232	0.0488609	0.552666	0	3.72563
ENSRNOG00000003743	Dars	Aspartate--tRNA ligase, cytoplasmic [Source:UniProtKB/Swiss-Prot;Acc:P15178]	13	41.0769	41.1326	7.3472	7.40217	0.677818	1.01581	0	0	0.989493	1	0.958164	0.194763	0.0169262	0	3.55737
ENSRNOG00000003744			10	27.9475	27.9484	25.9176	25.9186	NA	NA	0	0	0.613945	1	0.796515	0.0249291	0.762034	0	1.14759
ENSRNOG00000003746	CXB1_RAT	Gap junction beta-1 protein [Source:UniProtKB/Swiss-Prot;Acc:P08033]	X	89.4489	89.4568	NA	NA	NA	NA	0	0	0.977897	1	1.14939	0.0545305	0.507481	0	2.91913
ENSRNOG00000003747	Asna1	arsA arsenite transporter, ATP-binding, homolog 1 [Source:RefSeq peptide;Acc:NP_001093975]	19	24.7864	24.7945	16.1588	16.1619	0.944138	0.996722	0	0	0.764354	1	1.0467	-0.166875	0.0412477	0	5.00063
ENSRNOG00000003749	Xk	membrane transport protein XK [Source:RefSeq peptide;Acc:NP_001012227]	X	25.5911	25.6249	NA	NA	NA	NA	0	0	1	1	1.00164	0.127343	0.120446	0	1.56251
ENSRNOG00000003753	Rab1b	NA	X	73.108	73.1098	NA	NA	0.694911	1.04613	0	0	0.875412	1	0.987321	0.0409139	0.619114	0	5.07794
ENSRNOG00000003755	Clgn	calmegin precursor [Source:RefSeq peptide;Acc:NP_001102942]	19	26.4041	26.4361	16.7736	16.7857	NA	NA	0	0	0.684367	1	0.983971	-0.0553394	0.501194	0	1.1322
ENSRNOG00000003756	Lancl3	lanC-like protein 3 [Source:RefSeq peptide;Acc:NP_001178657]	X	25.6329	25.7631	NA	NA	NA	NA	0	0	0.763563	1	0.962835	-0.00494422	0.952117	0	1.14369
ENSRNOG00000003758	D4A2Z9_RAT		9	42.4749	42.4771	31.9482	31.9499	NA	NA	0	0	0.887248	1	0.981823	-0.279894	0.000522585	0	4.43966
ENSRNOG00000003759	Galc	galactocerebrosidase precursor [Source:RefSeq peptide;Acc:NP_001005888]	6	122.356	122.417	79.9201	79.9753	NA	NA	0	0	0.869207	1	0.918227	0.161245	0.0486971	0	1.99776
ENSRNOG00000003762	Smarca1	probable global transcription activator SNF2L1 [Source:RefSeq peptide;Acc:NP_001258119]	X	134.178	134.249	NA	NA	0.788567	0.979448	0	0	0.79971	1	0.972714	0.048596	0.554824	0	2.79714
ENSRNOG00000003763	Prdx4	Peroxiredoxin-4 [Source:UniProtKB/Swiss-Prot;Acc:Q9Z0V5]	X	61.4991	61.5163	NA	NA	0.227364	1.0628	0	0	0.576764	1	0.883823	0.163319	0.0458315	0	2.95757
ENSRNOG00000003767	Rps6kc1	ribosomal protein S6 kinase delta-1 [Source:RefSeq peptide;Acc:NP_001099454]	13	106.843	106.99	53.7	53.7	0.175777	1.03386	0	0	0.414283	1	1.11367	-0.134884	0.0998257	0	3.64976
ENSRNOG00000003769	Tmem163	Transmembrane protein 163 [Source:UniProtKB/Swiss-Prot;Acc:A9CMA6]	13	40.1441	40.3279	6.42773	6.60898	0.655392	0.971984	0	0	0.768779	1	1.01966	0.00916842	0.911337	0	3.07368
ENSRNOG00000003772	Csrp2	cysteine and glycine-rich protein 2 [Source:RefSeq peptide;Acc:NP_803174]	7	49.9102	49.9295	35.668	35.6918	0.322316	0.900733	0	0	0.451274	1	0.827344	0.0882778	0.282719	0	2.4812
ENSRNOG00000003773	Hmox2	Heme oxygenase 2 [Source:UniProtKB/Swiss-Prot;Acc:P23711]	10	10.9142	10.9294	5.71989	5.73254	0.0147873	1.15171	0	0	0.893143	1	0.995404	-0.0833158	0.310758	0	4.71617
ENSRNOG00000003778	Opn3	opsin-3 [Source:RefSeq peptide;Acc:NP_001178862]	13	91.3968	91.427	46.0657	46.0874	NA	NA	0	0	0.173528	1	1.37705	-0.0901641	0.27252	0	1.63674
ENSRNOG00000003779	Dedd	Death effector domain-containing protein [Source:UniProtKB/Swiss-Prot;Acc:Q9Z2K0]	13	87.2383	87.2417	43.0716	43.074	NA	NA	0	0	0.842449	1	1.07844	-0.140904	0.0854558	0	3.75983
ENSRNOG00000003782	Acot9	acyl-coenzyme A thioesterase 9, mitochondrial [Source:RefSeq peptide;Acc:NP_001013982]	X	61.5483	61.6001	NA	NA	0.0310005	0.877356	0	0	1	1	0.940792	-0.183132	0.0248878	0	4.10496
ENSRNOG00000003784	Rilp	rab-interacting lysosomal protein [Source:RefSeq peptide;Acc:NP_001099281]	10	62.8316	62.8348	53.3554	53.3578	NA	NA	0	0	0.252547	1	1.40345	-0.0945465	0.249795	0	0.670019
ENSRNOG00000003785	Usp43_predicted	ubiquitin carboxyl-terminal hydrolase 43 [Source:RefSeq peptide;Acc:NP_001119775]	10	54.5924	54.6538	47.3637	47.4029	NA	NA	0	0	0.41716	1	0.85996	0.161147	0.0488358	0	0.758275
ENSRNOG00000003786	Tspan6	tetraspanin-6 [Source:RefSeq peptide;Acc:NP_001094142]	X	121.432	121.439	NA	NA	0.0206279	1.10842	0	0	0.913074	1	0.8971	-0.102095	0.213795	0	3.76855
ENSRNOG00000003787	RGD1561241	Protein RGD1561241 [Source:UniProtKB/TrEMBL;Acc:D3ZCT1]	14	70.3304	70.4321	42.5536	42.6214	NA	NA	0	0	0.779125	1	0.967743	0.0744976	0.364919	0	2.01353
ENSRNOG00000003789	RGD1564613		X	22.0851	22.0858	NA	NA	NA	NA	0	0	0.444185	1	1.1281	-0.0745687	0.36446	0	0.735756
ENSRNOG00000003791			10	98.575	98.5757	86.39	86.3908	NA	NA	0	0	0.124446	1	0.844838	-0.12829	0.117687	0	0.773753
ENSRNOG00000003792	Med14	mediator of RNA polymerase II transcription subunit 14 [Source:RefSeq peptide;Acc:NP_001178656]	X	22.117	22.2056	NA	NA	NA	NA	0	0	0.939889	1	0.986395	-0.116971	0.154011	0	3.694
ENSRNOG00000003794	Nmral1	nmrA-like family domain-containing protein 1 [Source:RefSeq peptide;Acc:NP_001178517]	10	10.971	10.9793	5.76689	5.77377	NA	NA	0	0	0.223219	1	0.813041	0.0348354	0.672147	0	2.39258
ENSRNOG00000003795	Angel2	protein angel homolog 2 [Source:RefSeq peptide;Acc:NP_001128591]	13	107.014	107.03	53.7	53.7	0.163429	1.05373	0	0	0.334876	1	1.14564	-0.0223068	0.78643	0	3.24356
ENSRNOG00000003797	Mrps7	28S ribosomal protein S7, mitochondrial [Source:UniProtKB/Swiss-Prot;Acc:Q5I0K8]	10	105.684	105.687	94.9205	94.9243	0.316946	0.959355	0	0	0.923662	1	0.991586	0.0755874	0.357926	0	4.0744
ENSRNOG00000003800	Rgs9	Regulator of G-protein signaling 9 [Source:UniProtKB/Swiss-Prot;Acc:P49805]	10	98.5983	98.6479	86.418	86.4775	0.913383	1.00031	0	0	0.44261	1	2.19056	-0.117332	0.152736	0	3.5756
ENSRNOG00000003803	Zdhhc17	palmitoyltransferase ZDHHC17 [Source:RefSeq peptide;Acc:NP_001034429]	7	49.9333	49.9958	35.6964	35.7734	NA	NA	0	0	0.903883	1	0.974708	-0.0174106	0.832523	0	4.47456
ENSRNOG00000003805	Rnft1	Uncharacterized protein [Source:UniProtKB/TrEMBL;Acc:D3ZG84]	10	76.642	76.6511	63.9065	63.9134	NA	NA	0	0	0.766582	1	1.01568	0.205064	0.0118256	0	2.41954
ENSRNOG00000003807	Wnt9b	protein Wnt-9b precursor [Source:RefSeq peptide;Acc:NP_001100525]	10	92.88	92.9016	79.556	79.582	NA	NA	0	0	0.073168	1	0.602192	-0.139041	0.0897148	0	0.766634
ENSRNOG00000003809	Sat1	diamine acetyltransferase 1 [Source:RefSeq peptide;Acc:NP_001007668]	X	61.6337	61.6382	NA	NA	0.868741	1.00468	0	0	0.678161	1	0.866262	0.135247	0.0989092	0	4.6919
ENSRNOG00000003812	Nlgn3	neuroligin-3 precursor [Source:RefSeq peptide;Acc:NP_599163]	X	89.3762	89.3987	NA	NA	0.958949	0.999183	0	0	0.898856	1	0.991362	-0.00243389	0.976418	0	4.60229
ENSRNOG00000003813	Kcnk10	Potassium channel subfamily K member 10 [Source:UniProtKB/Swiss-Prot;Acc:Q9JIS4]	6	122.6	122.73	80.1401	80.2566	NA	NA	0	0	0.995064	1	0.950511	0.0316459	0.700656	0	1.03554
ENSRNOG00000003815	Slc25a11	mitochondrial 2-oxoglutarate/malate carrier protein [Source:RefSeq peptide;Acc:NP_071793]	10	57.5246	57.5267	49.3008	49.3024	NA	NA	0	0	0.711481	1	0.973738	0.141276	0.0846261	0	5.34574
ENSRNOG00000003816	Tada1l	Transcriptional adapter 1 [Source:UniProtKB/Swiss-Prot;Acc:Q5BJQ7]	13	82.1111	82.1256	39.38	39.3905	0.751263	0.984023	0	0	0.313339	1	0.838772	-0.0212419	0.796398	0	2.79976
ENSRNOG00000003821	D3ZDU2_RAT	raptor [Source:RefSeq peptide;Acc:NP_001127971]	10	109.002	109.303	95.3	95.3	0.7768	0.988493	0	0	0.813404	1	0.984188	-0.00941198	0.908991	0	3.21518
ENSRNOG00000003822	Slu7	Pre-mRNA-splicing factor SLU7 [Source:UniProtKB/Swiss-Prot;Acc:Q80ZG5]	10	28.5366	28.5514	26.6186	26.6362	0.658961	0.97164	0	0	0.382267	1	1.06745	-0.0707517	0.389592	0	4.10549
ENSRNOG00000003825	Wdr75	WD repeat-containing protein 75 [Source:RefSeq peptide;Acc:NP_001041354]	9	44.8431	44.8732	33.8175	33.8412	0.120374	1.07399	0	0	0.941459	1	1.02544	0.00043202	0.995814	0	2.40895
ENSRNOG00000003827	Wipi1	WD repeat domain phosphoinositide-interacting protein 1 [Source:RefSeq peptide;Acc:NP_001120769]	10	98.7223	98.7537	86.5667	86.6045	0.130502	1.14703	0	0	0.122811	1	1.29093	0.0495454	0.547109	0	3.36393
ENSRNOG00000003829	Ap3s1	AP-3 complex subunit sigma-1 [Source:RefSeq peptide;Acc:NP_001100403]	18	40.9443	41.0164	20.3762	20.3949	NA	NA	0	0	0.522145	1	1.04897	0.0332406	0.686346	0	4.5737
ENSRNOG00000003831	Tdp1	Tyrosyl-DNA phosphodiesterase 1 [Source:UniProtKB/Swiss-Prot;Acc:Q4G056]	6	124.101	124.163	81.4912	81.5465	0.404691	0.925658	0	0	0.00337809	0.724411	0.553164	0.0856519	0.297338	0	1.40705
ENSRNOG00000003832	Vash2	vasohibin-2 [Source:RefSeq peptide;Acc:NP_001102552]	13	107.031	107.05	53.7	53.7	0.0220082	0.88695	0	0	0.110656	1	0.736769	0.0297453	0.717848	0	0.884693
ENSRNOG00000003833	Nenf	Neudesin [Source:UniProtKB/Swiss-Prot;Acc:Q6IUR5]	13	107.368	107.377	53.7	53.7	NA	NA	0	0	0.814412	1	0.987745	0.0889676	0.27896	0	4.12241
ENSRNOG00000003834	Map2k4	dual specificity mitogen-activated protein kinase kinase 4 [Source:RefSeq peptide;Acc:NP_001025194]	10	52.0091	52.0416	45.7154	45.7361	NA	NA	0	0	0.701931	1	0.936408	0.0107898	0.895739	0	4.87504
ENSRNOG00000003835	Slc43a2	large neutral amino acids transporter small subunit 4 [Source:RefSeq peptide;Acc:NP_001099282]	10	62.8531	62.8948	53.3718	53.4036	0.634553	1.06991	0	0	0.58078	1	1.08712	-0.0929162	0.258091	0	3.55874
ENSRNOG00000003837	Mif4gd	MIF4G domain-containing protein [Source:UniProtKB/Swiss-Prot;Acc:Q6AXU7]	10	105.687	105.692	94.9247	94.93	0.458135	1.04218	0	0	0.2637	1	0.873137	-0.0422721	0.607515	0	1.74889
ENSRNOG00000003840	Slit2	slit homolog 2 protein precursor [Source:RefSeq peptide;Acc:NP_072154]	14	67.5482	67.8918	40.6988	40.9279	NA	NA	0	0	0.235238	1	0.825546	0.104689	0.202325	0	2.70772
ENSRNOG00000003841	F1LVN4_RAT	Potassium voltage-gated channel subfamily H member 1 [Source:UniProtKB/Swiss-Prot;Acc:Q63472]	13	108.13	108.408	53.7	53.7	0.565711	1.02875	0	0	0.682422	1	1.06243	-0.0963848	0.240665	0	3.33544
ENSRNOG00000003844	Dhx15	DEAH (Asp-Glu-Ala-His) box polypeptide 15 [Source:RefSeq peptide;Acc:NP_001178526]	14	63.5634	63.601	38.0423	38.0673	0.414048	0.973807	0	0	1	1	0.951375	-0.0702983	0.392645	0	4.77053
ENSRNOG00000003845	Wnt3	proto-oncogene Wnt-3 [Source:RefSeq peptide;Acc:NP_001099185]	10	92.9256	92.9696	79.6107	79.6635	NA	NA	0	0	0.79699	1	0.859513	0.0297027	0.718235	0	0.787727
ENSRNOG00000003846	Pitpna	Phosphatidylinositol transfer protein alpha isoform [Source:UniProtKB/Swiss-Prot;Acc:P16446]	10	62.9085	62.9489	53.4141	53.4449	NA	NA	0	0	0.376598	1	1.05057	-0.155989	0.0566276	0	6.98355
ENSRNOG00000003847	LOC687192	GID complex subunit 4, VID24 homolog (S. cerevisiae) [Source:MGI Symbol;Acc:MGI:1914021]	10	46.6849	46.8044	42.318	42.3943	0.277433	1.0738	0	0	0.694517	1	1.0371	0.228371	0.0049417	0	3.95022
ENSRNOG00000003848	Med12	mediator of RNA polymerase II transcription subunit 12 [Source:RefSeq peptide;Acc:NP_001180221]	X	89.3515	89.3745	NA	NA	0.194941	0.896511	0	0	0.965197	1	1.02309	-0.0424304	0.60617	0	2.20293
ENSRNOG00000003849	Stx8	Syntaxin-8 [Source:UniProtKB/Swiss-Prot;Acc:Q9Z2Q7]	10	54.7006	54.942	47.4327	47.5868	0.709501	0.985115	0	0	0.806526	1	1.05906	-0.0416268	0.613014	0	4.05077
ENSRNOG00000003853	Scoc	Short coiled-coil protein [Source:UniProtKB/Swiss-Prot;Acc:Q5RJZ6]	19	26.3519	26.3965	16.7537	16.7707	0.660363	1.01168	0	0	0.912619	1	1.02872	0.197549	0.0153864	0	5.83093
ENSRNOG00000003855	Dnaja3	dnaJ homolog subfamily A member 3, mitochondrial isoform 1 [Source:RefSeq peptide;Acc:NP_001033684]	10	10.9847	11.0094	5.77827	5.79866	0.0344246	1.42729	0	0	0.722623	1	1.04149	0.158736	0.0523592	0	4.44068
ENSRNOG00000003858	Atp6ap2	Renin receptor [Source:UniProtKB/Swiss-Prot;Acc:Q6AXS4]	X	22.2642	22.292	NA	NA	0.402785	1.02855	0	0	0.890709	1	0.998764	-0.153545	0.0606635	0	6.63948
ENSRNOG00000003861	Gorab	RAB6-interacting golgin [Source:UniProtKB/Swiss-Prot;Acc:B1H222]	13	79.1039	79.1205	37.4307	37.4414	0.940214	0.987458	0	0	0.851755	1	1.00511	0.0167385	0.838898	0	2.40298
ENSRNOG00000003863	RGD1564093	uncharacterized protein LOC288920 [Source:RefSeq peptide;Acc:NP_001099416]	19	24.7814	24.7848	16.1569	16.1582	NA	NA	0	0	0.708936	1	1.03549	-0.107265	0.191379	0	4.37409
ENSRNOG00000003864	Gipc1	PDZ domain-containing protein GIPC1 [Source:UniProtKB/Swiss-Prot;Acc:Q9Z254]	19	26.1657	26.1773	16.683	16.6874	0.605725	1.05	0	0	0.797083	1	1.0336	0.123181	0.133161	0	3.62091
ENSRNOG00000003866	Cxcr4	C-X-C chemokine receptor type 4 [Source:RefSeq peptide;Acc:NP_071541]	13	41.3083	41.3122	7.57531	7.57916	0.529751	1.0222	0	0	0.954308	1	1.04054	0.100524	0.220967	0	0.974112
ENSRNOG00000003869	Sod3	Extracellular superoxide dismutase [Cu-Zn] [Source:UniProtKB/Swiss-Prot;Acc:Q08420]	14	63.3814	63.3872	37.921	37.9248	0.0292362	0.866902	0	0	0.865486	1	1.01962	0.0443362	0.590074	0	2.8942
ENSRNOG00000003870	C1qtnf2	complement C1q tumor necrosis factor-related protein 2 precursor [Source:RefSeq peptide;Acc:NP_001178847]	10	28.579	28.5885	26.669	26.6803	NA	NA	0	0	0.416887	1	0.865494	-0.163447	0.0456594	0	1.19659
ENSRNOG00000003872	Slc40a1	solute carrier family 40 member 1 [Source:RefSeq peptide;Acc:NP_579849]	9	44.9774	44.9954	33.9235	33.9377	NA	NA	0	0	0.805117	1	0.889195	-0.100582	0.220696	0	1.58312
ENSRNOG00000003873	Cpd	carboxypeptidase D precursor [Source:RefSeq peptide;Acc:NP_036968]	10	67.3273	67.3908	56.79	56.8386	0.803824	0.917996	0	0	0.664126	1	0.941458	-0.0264901	0.747621	0	4.0291
ENSRNOG00000003875	Ocrl	oculocerebrorenal syndrome of Lowe [Source:RefSeq peptide;Acc:NP_001101726]	X	134.272	134.323	NA	NA	0.280979	0.930572	0	0	0.51181	1	0.892916	0.0664777	0.418938	0	2.95438
ENSRNOG00000003878	Thsd7b	thrombospondin type-1 domain-containing protein 7B precursor [Source:RefSeq peptide;Acc:NP_001178598]	13	42.507	43.1175	8.7569	9.35867	NA	NA	0	0	0.755461	1	1.13379	0.186739	0.0221311	0	1.43427
ENSRNOG00000003879	Rnf167	E3 ubiquitin-protein ligase RNF167 [Source:UniProtKB/Swiss-Prot;Acc:Q5XIL0]	10	57.527	57.5313	49.3027	49.3059	0.128613	0.918373	0	0	0.893284	1	1.02323	-0.238096	0.00334634	0	4.5914
ENSRNOG00000003880	Tph2	Tryptophan 5-hydroxylase 2 [Source:UniProtKB/Swiss-Prot;Acc:Q8CGU9]	7	54.321	54.4307	41.1027	41.2378	NA	NA	0	0	0.841164	1	1.08022	-0.00860839	0.916732	0	1.73891
ENSRNOG00000003881	Nit1	Nitrilase homolog 1 [Source:UniProtKB/Swiss-Prot;Acc:Q7TQ94]	13	87.2426	87.2461	43.0747	43.0772	0.263983	0.940801	0	0	0.305118	1	1.16451	-0.0527206	0.521693	0	4.11185
ENSRNOG00000003882	F1LPD3_RAT	centrosomal protein 350 [Source:MGI Symbol;Acc:MGI:1921331]	13	70.8176	70.9942	32.0601	32.1955	NA	NA	0	0	0.201567	1	1.14637	0.158146	0.0532533	0	3.09395
ENSRNOG00000003883	LOC317456	uncharacterized protein LOC317456 [Source:RefSeq peptide;Acc:NP_001041359]	X	62.0928	62.0937	NA	NA	NA	NA	0	0	0.79849	1	1.00462	-0.107658	0.189749	0	3.86733
ENSRNOG00000003887	Lgi2	leucine-rich repeat LGI family member 2 precursor [Source:RefSeq peptide;Acc:NP_001100689]	14	63.1846	63.2121	37.7898	37.8081	NA	NA	0	0	1	1	1.04454	-0.12429	0.129675	0	3.31854
ENSRNOG00000003889	Tbc1d15	Protein Tbc1d15; Tbc1d15 protein [Source:UniProtKB/TrEMBL;Acc:Q4FZT5]	7	54.4468	54.5044	41.2576	41.3287	0.418556	0.96018	0	0	0.964248	1	0.990302	0.00194142	0.981189	0	3.47519
ENSRNOG00000003890	Nap1l1	nucleosome assembly protein 1-like 1 [Source:RefSeq peptide;Acc:NP_446013]	7	50.5069	50.5302	36.4031	36.4318	0.888816	0.995723	0	0	0.784692	1	1.01084	0.0637931	0.43801	0	6.42632
ENSRNOG00000003891	PORF1_RAT	Putative preoptic regulatory factor 1 [Source:UniProtKB/Swiss-Prot;Acc:P18889]	6	114.305	114.305	72.8336	72.8337	NA	NA	0	0	0.578977	1	1.17689	-0.119076	0.146685	0	2.33475
ENSRNOG00000003892	Myl6b	NA	7	1.77262	1.77566	0	0	0.67824	1.0147	0	0	0.700807	1	0.968422	0.0863044	0.29366	0	7.41789
ENSRNOG00000003893	Ccnjl	cyclin-J-like protein [Source:RefSeq peptide;Acc:NP_001032862]	10	28.6274	28.6846	26.7266	26.7947	NA	NA	0	0	0.705275	1	0.960647	-0.0311321	0.705289	0	1.12609
ENSRNOG00000003894	Dio2	NA	6	114.308	114.317	72.8367	72.8444	NA	NA	0	0	0.284558	1	1.18919	-0.169432	0.0381949	0	2.3809
ENSRNOG00000003897	Col1a1	Collagen alpha-1(I) chain [Source:UniProtKB/Swiss-Prot;Acc:P02454]	10	83.6225	83.638	69.4603	69.4742	NA	NA	0	0	0.235892	1	0.837651	0.0623157	0.448714	0	2.17199
ENSRNOG00000003901	Ccdc104	Coiled-coil domain-containing protein 104 [Source:UniProtKB/Swiss-Prot;Acc:Q4V8E4]	14	110.22	110.246	74	74	0.184629	1.05806	0	0	0.740791	1	0.996026	-0.0957039	0.244019	0	5.5423
ENSRNOG00000003905	Nsf	vesicle-fusing ATPase [Source:RefSeq peptide;Acc:NP_068516]	10	92.9744	93.0826	79.6693	79.7991	0.747898	0.984352	0	0	0.618645	1	0.95106	-0.121867	0.137381	0	7.33689
ENSRNOG00000003908	F1M4J3_RAT		6	114.833	114.969	73.297	73.4155	NA	NA	0	0	1	1	1.0085	0.058264	0.47881	0	0.974187
ENSRNOG00000003909	Esyt1	Extended synaptotagmin-1 [Source:UniProtKB/Swiss-Prot;Acc:Q9Z1X1]	7	1.7907	1.80806	0	0	NA	NA	0	0	0.397558	1	0.875538	-0.011629	0.887681	0	2.12614
ENSRNOG00000003910	D3ZCQ4_RAT		13	82.6587	82.7446	39.7743	39.8361	NA	NA	0	0	0.8517	1	1.04112	0.0718415	0.382312	0	2.48999
ENSRNOG00000003915	Tmem206	Transmembrane protein 206 [Source:UniProtKB/Swiss-Prot;Acc:Q66H28]	13	107.387	107.412	53.7	53.7	NA	NA	0	0	0.853273	1	0.999393	-0.0434829	0.597257	0	2.54001
ENSRNOG00000003917	Uck2	Uridine-cytidine kinase 2 [Source:UniProtKB/Swiss-Prot;Acc:Q9QYG8]	13	82.8929	82.9496	39.9429	39.9837	0.398613	0.941805	0	0	0.7302	1	0.928039	-0.151074	0.0649804	0	2.51953
ENSRNOG00000003918	Slc25a19	mitochondrial thiamine pyrophosphate carrier [Source:RefSeq peptide;Acc:NP_001007675]	10	105.695	105.707	94.9334	94.9489	NA	NA	0	0	0.977068	1	0.999998	-0.0835771	0.309237	0	2.61027
ENSRNOG00000003919	Rps6kb1	Ribosomal protein S6 kinase beta-1 [Source:UniProtKB/Swiss-Prot;Acc:P67999]	10	76.657	76.6981	63.918	63.9493	0.389156	1.06398	0	0	0.57752	1	1.00948	0.0520984	0.526626	0	3.56111
ENSRNOG00000003923	Rab21	Ras-related protein Rab-21 [Source:UniProtKB/Swiss-Prot;Acc:Q6AXT5]	7	54.5503	54.575	41.3851	41.4157	0.329963	1.06953	0	0	0.349099	1	1.10287	0.0118103	0.885942	0	4.99211
ENSRNOG00000003924	Pi4k2b	Phosphatidylinositol 4-kinase type 2-beta [Source:UniProtKB/Swiss-Prot;Acc:Q5XIL2]	14	62.9759	63.0027	37.6506	37.6685	NA	NA	0	0	0.59015	1	1.09239	-0.0866084	0.291956	0	1.2743
ENSRNOG00000003927	Cd55	decay accelerating factor 1 precursor [Source:RefSeq peptide;Acc:NP_071605]	13	43.3201	43.3483	9.55841	9.58618	NA	NA	0	0	0.825011	1	1.03638	0.00651052	0.936976	0	1.43984
ENSRNOG00000003928	Tmco1	Transmembrane and coiled-coil domains protein 1 [Source:UniProtKB/Swiss-Prot;Acc:Q5I0H4]	13	82.9718	82.9953	39.9997	40.0166	0.0157835	1.16735	0	0	0.665386	1	1.05738	0.036775	0.655032	0	3.96915
ENSRNOG00000003929	Pcdh19	protocadherin-19 precursor [Source:RefSeq peptide;Acc:NP_001162600]	X	121.11	121.209	NA	NA	NA	NA	0	0	0.753724	1	0.957322	0.0801441	0.329601	0	2.71152
ENSRNOG00000003931	Arsg	Arylsulfatase G [Source:UniProtKB/Swiss-Prot;Acc:Q32KJ9]	10	98.7546	98.8338	86.6056	86.7006	NA	NA	0	0	0.766083	1	1.02774	0.187114	0.0218601	0	1.52783
ENSRNOG00000003935	D3ZI63_RAT	SERTA domain-containing protein 4 [Source:RefSeq peptide;Acc:NP_001101821]	13	108.742	108.751	53.7	53.7	NA	NA	0	0	0.818992	1	0.958238	-0.139196	0.0893549	0	2.04159
ENSRNOG00000003936	Pwwp2a	PWWP domain-containing protein 2A [Source:RefSeq peptide;Acc:NP_001120768]	10	28.7892	28.828	26.9191	26.9653	NA	NA	0	0	0.875365	1	0.972609	0.0555616	0.499474	0	2.80789
ENSRNOG00000003938	LOC100363487	tubulin delta chain [Source:RefSeq peptide;Acc:NP_001099296]	10	76.6986	76.7151	63.9497	63.9624	NA	NA	0	0	0.214719	1	1.41671	-0.0781938	0.341543	0	1.25084
ENSRNOG00000003942	Asnsd1	asparagine synthetase domain-containing protein 1 [Source:RefSeq peptide;Acc:NP_001100233]	9	45.0845	45.0891	34.008	34.0116	0.601166	1.02074	0	0	0.933741	1	0.976071	-0.163015	0.0462424	0	3.83524
ENSRNOG00000003946	Tor1aip1	Torsin-1A-interacting protein 1 [Source:UniProtKB/Swiss-Prot;Acc:Q5PQX1]	13	71.0428	71.0728	32.2277	32.247	0.225222	1.05288	0	0	0.893668	1	0.956681	-0.00967688	0.906441	0	2.92084
ENSRNOG00000003947	Ntn1	netrin-1 precursor [Source:RefSeq peptide;Acc:NP_446183]	10	54.9505	55.1335	47.5922	47.709	NA	NA	0	0	0.314472	1	1.46603	0.185912	0.0227385	0	1.90362
ENSRNOG00000003948	Llgl1	lethal(2) giant larvae protein homolog 1 [Source:RefSeq peptide;Acc:NP_690057]	10	46.8458	46.8591	42.4207	42.4291	NA	NA	0	0	0.726226	1	1.09572	-0.0800001	0.330473	0	3.26353
ENSRNOG00000003949	Phka2	phosphorylase b kinase regulatory subunit alpha, liver isoform [Source:RefSeq peptide;Acc:NP_001177923]	X	55.4587	55.5397	NA	NA	NA	NA	0	0	0.845607	1	0.959754	0.0329597	0.688859	0	1.25634
ENSRNOG00000003951	Psmc1	26S protease regulatory subunit 4 [Source:UniProtKB/Swiss-Prot;Acc:P62193]	6	124.381	124.393	81.7429	81.754	0.182447	1.06555	0	0	1	1	0.986115	-0.138204	0.0916832	0	6.00703
ENSRNOG00000003953	RB3GP_RAT	RAB3 GTPase activating protein subunit 1 [Source:MGI Symbol;Acc:MGI:2445001]	13	40.5943	40.6357	6.87157	6.91236	NA	NA	0	0	0.744392	1	1.01707	0.0362843	0.659345	0	4.22248
ENSRNOG00000003955	Spata7	spermatogenesis-associated protein 7 homolog [Source:RefSeq peptide;Acc:NP_620217]	6	122.787	122.832	80.3081	80.349	0.3139	1.08756	0	0	0.718543	1	1.00512	-0.0692743	0.399593	0	2.94099
ENSRNOG00000003956	LOC100363276	Protein LOC100363276 [Source:UniProtKB/TrEMBL;Acc:D4A5T6]	X	45.6392	45.9069	NA	NA	NA	NA	0	0	0.536534	1	1.26651	0.130361	0.111828	0	2.33635
ENSRNOG00000003957	D4A159_RAT	NA	13	58.4284	58.4303	23.0084	23.0098	NA	NA	0	0	0.55486	1	1.0665	-0.178429	0.0289192	0	3.23167
ENSRNOG00000003958	Commd10	COMM domain-containing protein 10 [Source:RefSeq peptide;Acc:NP_001004276]	18	41.2269	41.3628	20.4495	20.4847	0.0202415	0.855339	0	0	0.265164	1	0.841109	0.055615	0.499062	0	3.9133
ENSRNOG00000003959	Rgs18	regulator of G-protein signaling 18 [Source:RefSeq peptide;Acc:NP_001040549]	13	58.6079	58.6296	23.1377	23.1533	NA	NA	0	0	0.566379	1	1.19605	-0.120151	0.143045	0	0.933817
ENSRNOG00000003960	Tmem27	Collectrin [Source:UniProtKB/Swiss-Prot;Acc:Q9ESG3]	X	51.1187	51.1498	NA	NA	NA	NA	0	0	NA	NA	NA	0.0659283	0.422801	0	0.947967
ENSRNOG00000003964	Nsmce2	E3 SUMO-protein ligase NSE2 [Source:UniProtKB/Swiss-Prot;Acc:Q4V8A0]	7	96.1676	96.3936	68.6798	68.821	NA	NA	0	0	0.174078	1	1.30591	-0.109308	0.183012	0	2.76262
ENSRNOG00000003967	Tmem49	Vacuole membrane protein 1 [Source:UniProtKB/Swiss-Prot;Acc:Q91ZQ0]	10	74.8651	74.9642	62.549	62.6246	NA	NA	0	0	0.925629	1	1.00103	-0.00305614	0.970392	0	5.11512
ENSRNOG00000003969	Fam20a	protein FAM20A [Source:RefSeq peptide;Acc:NP_001012237]	10	99.1138	99.1706	87.0366	87.1047	NA	NA	0	0	0.372783	1	1.24708	-0.0169768	0.836637	0	1.03061
ENSRNOG00000003970	D3ZER6_RAT	transportin-2 [Source:RefSeq peptide;Acc:NP_001100636]	19	24.7557	24.7756	16.1472	16.1547	0.985619	1.00544	0	0	0.768419	1	0.970514	0.0210516	0.798182	0	4.85003
ENSRNOG00000003971	Gosr1	Golgi SNAP receptor complex member 1 [Source:UniProtKB/Swiss-Prot;Acc:Q62931]	10	67.4072	67.5727	56.8511	56.9776	NA	NA	0	0	0.869034	1	0.980762	-0.125012	0.127445	0	3.08841
ENSRNOG00000003973	Cyb5r1	NADH-cytochrome b5 reductase 1 [Source:RefSeq peptide;Acc:NP_001013144]	13	47.3478	47.3542	13.5285	13.5348	NA	NA	0	0	0.885572	1	1.01676	-0.0494636	0.547771	0	3.63582
ENSRNOG00000003975	Pfn1	Profilin-1 [Source:UniProtKB/Swiss-Prot;Acc:P62963]	10	57.5317	57.5344	49.3062	49.3083	NA	NA	0	0	0.758892	1	1.06412	-0.0719268	0.381746	0	6.24936
ENSRNOG00000003977	Dusp1	Dual specificity protein phosphatase 1 [Source:UniProtKB/Swiss-Prot;Acc:Q64623]	10	16.9429	16.9457	11.6611	11.6648	0.578482	1.13156	0	0	0.198209	1	1.64222	-0.00946354	0.908495	0	4.04734
ENSRNOG00000003979	D3ZVX7_RAT	zinc finger, RAN-binding domain containing 3 [Source:MGI Symbol;Acc:MGI:1918362]	13	40.649	40.7301	6.92548	7.00535	NA	NA	0	0	0.350218	1	0.869911	0.0381404	0.643089	0	1.15542
ENSRNOG00000003980	Ttc1	tetratricopeptide repeat protein 1 [Source:RefSeq peptide;Acc:NP_001005529]	10	28.836	28.861	26.9748	27.0046	0.146799	0.941137	0	0	0.842052	1	0.989508	0.0329704	0.688763	0	4.62421
ENSRNOG00000003981	Znf18	Zinc finger protein 18 [Source:UniProtKB/Swiss-Prot;Acc:Q642B9]	10	52.5189	52.5339	46.0407	46.0502	NA	NA	0	0	1	1	0.988619	0.0273328	0.739875	0	1.8083
ENSRNOG00000003982	PTN21_RAT	tyrosine-protein phosphatase non-receptor type 21 [Source:RefSeq peptide;Acc:NP_598229]	6	122.84	122.889	80.3561	80.4004	NA	NA	0	0	0.706924	1	1.08842	0.0760354	0.355075	0	0.959564
ENSRNOG00000003983	Pfdn2	Prefoldin subunit 2 [Source:UniProtKB/Swiss-Prot;Acc:B0BN18]	13	87.2461	87.2641	43.0772	43.0901	0.987745	1.00197	0	0	0.957764	1	0.992136	0.101727	0.215459	0	4.82355
ENSRNOG00000003984	Apln	Apelin Apelin-36 Apelin-31 Apelin-28 Apelin-13 [Source:UniProtKB/Swiss-Prot;Acc:Q9R0R3]	X	134.389	134.397	NA	NA	0.846053	0.989982	0	0	0.21501	1	1.159	0.0561732	0.494757	0	2.91801
ENSRNOG00000003985	Tmem19	Transmembrane protein 19 [Source:UniProtKB/Swiss-Prot;Acc:Q6P726]	7	54.6065	54.6328	41.4544	41.4868	0.334148	0.961304	0	0	0.537815	1	0.906713	-0.0373421	0.65006	0	2.74992
ENSRNOG00000003988	DJC27_RAT	DnaJ homolog subfamily C member 27 [Source:UniProtKB/Swiss-Prot;Acc:Q6IML7]	6	27.0611	27.0873	17.2489	17.2698	NA	NA	0	0	0.816916	1	0.995017	0.0596952	0.468057	0	4.70471
ENSRNOG00000003990	Grb2	Growth factor receptor-bound protein 2 [Source:UniProtKB/Swiss-Prot;Acc:P62994]	10	105.722	105.819	94.9664	95.0824	0.773286	0.994213	0	0	0.877692	1	0.967647	-0.171743	0.0356009	0	5.82059
ENSRNOG00000003992	Pik3r6	phosphoinositide 3-kinase regulatory subunit 6 [Source:RefSeq peptide;Acc:NP_001074913]	10	55.2547	55.3035	47.7864	47.8175	NA	NA	0	0	0.775918	1	0.937229	-0.0215672	0.793349	0	0.674918
ENSRNOG00000003993	LOC688019		7	54.6442	54.6553	41.5009	41.5146	NA	NA	0	0	0.106441	1	1.44115	-0.0758701	0.356126	0	1.719
ENSRNOG00000003997	Pld5	inactive phospholipase D5 [Source:RefSeq peptide;Acc:NP_001178603]	13	91.7151	91.903	46.2949	46.4302	NA	NA	0	0	0.349035	1	0.784198	0.128509	0.117057	0	1.90463
ENSRNOG00000003998	Sgca	alpha-sarcoglycan precursor [Source:RefSeq peptide;Acc:NP_001100509]	10	83.6473	83.7254	69.4826	69.5528	0.923376	1.01152	0	0	0.338682	1	0.842395	0.162557	0.0468681	0	1.51806
ENSRNOG00000003999	Adcy3	adenylate cyclase type 3 [Source:RefSeq peptide;Acc:NP_570135]	6	27.1183	27.2023	17.2947	17.3618	0.7972	0.989491	0	0	0.361584	1	1.17836	0.0335606	0.683488	0	3.37686
ENSRNOG00000004000	RGD1306595	Transcription elongation factor, mitochondrial [Source:UniProtKB/Swiss-Prot;Acc:Q4KM51]	10	68.3412	68.3456	57.5647	57.568	0.216084	0.939187	0	0	0.512976	1	0.835614	0.00114672	0.988888	0	1.61872
ENSRNOG00000004001	Osgepl1	Probable tRNA threonylcarbamoyladenosine biosynthesis protein Osgepl1 [Source:UniProtKB/Swiss-Prot;Acc:Q4V7F3]	9	45.1648	45.1787	34.0714	34.0824	0.654571	0.957951	0	0	0.532111	1	0.864708	0.147056	0.072532	0	2.12744
ENSRNOG00000004002	Pgam1		10	68.3504	68.3511	57.5717	57.5723	NA	NA	0	0	1	1	1.02041	0.0143046	0.862071	0	4.61145
ENSRNOG00000004003	Dusp10	dual specificity protein phosphatase 10 [Source:RefSeq peptide;Acc:NP_001099204]	13	100.022	100.06	52.2761	52.3029	NA	NA	0	0	0.567189	1	0.872589	0.129707	0.113653	0	1.67909
ENSRNOG00000004004	RGD1565082	Protein RGD1565082 [Source:UniProtKB/TrEMBL;Acc:D3ZDR9]	6	124.396	124.435	81.7562	81.7917	NA	NA	0	0	0.282437	1	0.853913	0.0613628	0.455695	0	1.69634
ENSRNOG00000004005	Camk2b	calcium/calmodulin-dependent protein kinase type II subunit beta isoform 2 [Source:RefSeq peptide;Acc:NP_068507]	14	86.6327	86.7213	55.9356	55.9993	0.488729	0.975039	0	0	0.702448	1	0.974207	-0.0450492	0.584104	0	7.04714
ENSRNOG00000004006	Dnajb9	DnaJ homolog subfamily B member 9 [Source:UniProtKB/Swiss-Prot;Acc:P97554]	6	63.583	63.5872	45.4028	45.4047	0.111671	1.07227	0	0	0.233009	1	1.23122	-0.0853212	0.299214	0	4.1968
ENSRNOG00000004011	Nedd1	protein NEDD1 [Source:RefSeq peptide;Acc:NP_001100249]	7	29.7042	29.7454	11.706	11.74	NA	NA	0	0	0.919644	1	0.948811	0.0910797	0.26766	0	1.01905
ENSRNOG00000004012	LOC679963		13	71.2372	71.2387	32.3531	32.3541	NA	NA	0	0	0.173399	1	0.84921	-0.0254038	0.757642	0	1.13553
ENSRNOG00000004013	Grip1	glutamate receptor-interacting protein 1 [Source:RefSeq peptide;Acc:NP_114458]	7	59.1501	59.3154	47.0528	47.2565	NA	NA	0	0	0.914237	1	1.00368	-0.0747892	0.363039	0	2.19865
ENSRNOG00000004014	Chmp6	charged multivesicular body protein 6 [Source:RefSeq peptide;Acc:NP_001099326]	10	109.318	109.323	95.3	95.3	0.10236	1.11519	0	0	0.865495	1	0.98717	0.00750612	0.927363	0	3.0681
ENSRNOG00000004016	Msl3	male-specific lethal 3 homolog [Source:RefSeq peptide;Acc:NP_001014133]	X	46.3308	46.3485	NA	NA	0.259887	1.0351	0	0	0.765133	1	0.988731	-0.111925	0.172688	0	3.67302
ENSRNOG00000004019	Phlda1	Pleckstrin homology-like domain family A member 1 [Source:UniProtKB/Swiss-Prot;Acc:Q9QZA1]	7	50.541	50.5428	36.4452	36.4473	NA	NA	0	0	0.189604	1	1.40486	-0.112489	0.170522	0	2.07466
ENSRNOG00000004022	Klhdc9	kelch domain-containing protein 9 [Source:RefSeq peptide;Acc:NP_001101820]	13	87.263	87.2661	43.0894	43.0916	NA	NA	0	0	0.306352	1	0.847293	0.102661	0.211256	0	0.786143
ENSRNOG00000004026	Atp2b1	Plasma membrane calcium-transporting ATPase 1 [Source:UniProtKB/Swiss-Prot;Acc:P11505]	7	36.4937	36.6003	19.1368	19.2682	0.701682	0.954514	0	0	0.858483	1	0.937656	-0.10724	0.191483	0	6.67932
ENSRNOG00000004027	Aldh9a1	4-trimethylaminobutyraldehyde dehydrogenase [Source:RefSeq peptide;Acc:NP_071609]	13	83.0173	83.034	40.0325	40.0445	0.518945	1.03634	0	0	0.320965	1	1.12718	0.00728922	0.929456	0	3.80945
ENSRNOG00000004032	D3ZUJ3_RAT	RIKEN cDNA 2310067B10 gene [Source:MGI Symbol;Acc:MGI:1919197]	10	105.888	105.9	95.1651	95.1803	NA	NA	0	0	1	1	0.999939	-0.0723197	0.379144	0	4.36975
ENSRNOG00000004033	D3ZAG0_RAT	Uncharacterized protein [Source:UniProtKB/TrEMBL;Acc:D3ZAX7]	18	41.5453	41.6657	20.5321	20.5633	0.195941	0.938944	0	0	0.913936	1	1.0224	-0.0937518	0.253816	0	3.02922
ENSRNOG00000004035	Hrb2	KRR1 small subunit processome component homolog [Source:RefSeq peptide;Acc:NP_001101564]	7	51.0699	51.0814	37.0969	37.111	0.126512	0.942231	0	0	1	1	0.93871	0.0271141	0.741883	0	2.89768
ENSRNOG00000004036	Snx12	sorting nexin 12 [Source:RefSeq peptide;Acc:NP_001102287]	X	89.1806	89.3029	NA	NA	NA	NA	0	0	0.78238	1	1.03591	2.48900172363468e-05	0.999759	0	3.45416
ENSRNOG00000004040	D3ZAE9_RAT	ATP-binding cassette, sub-family A (ABC1), member 8b [Source:MGI Symbol;Acc:MGI:1351668]	10	99.3921	99.4528	87.3705	87.4434	0.499893	0.958899	0	0	0.300519	1	0.841133	0.0137571	0.867301	0	1.46196
ENSRNOG00000004041	D3ZEQ1_RAT	inositol polyphosphate 5-phosphatase K [Source:RefSeq peptide;Acc:NP_001013881]	10	62.9534	62.9708	53.4484	53.4617	0.216396	0.940163	0	0	0.997059	1	0.962094	-0.0154905	0.850765	0	3.18289
ENSRNOG00000004048	F1LNJ1_RAT	leucine-rich repeat serine/threonine-protein kinase 2 [Source:RefSeq peptide;Acc:NP_001178718]	7	130.106	130.268	97.4	97.5592	NA	NA	0	0	0.417254	1	1.1135	-0.168665	0.0390892	0	2.68774
ENSRNOG00000004049	Baiap2	Brain-specific angiogenesis inhibitor 1-associated protein 2 [Source:UniProtKB/Swiss-Prot;Acc:Q6GMN2]	10	109.351	109.419	95.3	95.3	NA	NA	0	0	0.529241	1	1.08827	-0.122443	0.135518	0	5.60997
ENSRNOG00000004050	Snrk	SNF-related serine/threonine-protein kinase [Source:UniProtKB/Swiss-Prot;Acc:Q63553]	8	121.958	121.969	94.2009	94.2092	NA	NA	0	0	0.629173	1	1.08011	-0.190521	0.0195275	0	3.87307
ENSRNOG00000004052	Ppp1r9b	Neurabin-2 [Source:UniProtKB/Swiss-Prot;Acc:O35274]	10	83.6764	83.6889	69.5088	69.52	NA	NA	0	0	0.597258	1	1.04539	0.0400765	0.626312	0	7.59774
ENSRNOG00000004057	Ccdc88a		14	110.376	110.525	74	74	NA	NA	0	0	0.622004	1	0.993954	-0.0623264	0.448636	0	3.92284
ENSRNOG00000004059	RGD1561792	peptidyl-tRNA hydrolase domain containing 1 [Source:RefSeq peptide;Acc:NP_001127996]	6	27.2106	27.214	17.3685	17.3712	0.917701	0.989875	0	0	0.932083	1	1.00106	-0.0745883	0.364334	0	1.99019
ENSRNOG00000004060	Calm1	Calmodulin [Source:UniProtKB/Swiss-Prot;Acc:P62161]	6	124.478	124.488	81.8299	81.839	0.554323	0.994691	0	0	0.632101	1	1.03812	0.0804979	0.327463	0	9.79872
ENSRNOG00000004061	Pnn	pinin [Source:RefSeq peptide;Acc:NP_001102493]	6	79.759	79.7673	52.541	52.5441	0.370306	1.07752	0	0	0.443363	1	1.06546	-0.0249416	0.761919	0	4.94249
ENSRNOG00000004063	RGD1309926		10	17.1843	17.2652	11.9793	12.0859	NA	NA	0	0	0.919066	1	0.992289	0.074526	0.364735	0	1.22674
ENSRNOG00000004067	Nrcam	neuron-glia-CAM-related cell adhesion molecule [Source:MGI Symbol;Acc:MGI:104750]	6	63.7175	64.0155	45.4645	45.6012	0.270305	1.07228	0	0	0.809012	1	0.983386	-0.1645	0.0442647	0	5.72401
ENSRNOG00000004068	Ncoa1	nuclear receptor coactivator 1 [Source:RefSeq peptide;Acc:NP_001101482]	6	27.2244	27.4739	17.3795	17.5791	0.455596	0.975123	0	0	0.853734	1	1.00696	-0.181105	0.0265621	0	4.36863
ENSRNOG00000004072	Myo1c	Unconventional myosin-Ic [Source:UniProtKB/Swiss-Prot;Acc:Q63355]	10	62.9855	63.007	53.473	53.4893	NA	NA	0	0	0.646911	1	1.08721	0.0958088	0.2435	0	2.32002
ENSRNOG00000004075	Ccdc42	coiled-coil domain-containing protein 42A [Source:RefSeq peptide;Acc:NP_001100479]	10	55.3391	55.3493	47.8402	47.8467	NA	NA	0	0	0.224381	1	1.44669	-0.199385	0.0144394	0	0.668262
ENSRNOG00000004076	D3ZPT8_RAT	PMS1 protein homolog 1 [Source:RefSeq peptide;Acc:NP_001009535]	9	45.2123	45.2925	34.1089	34.1722	0.0586973	1.10856	0	0	0.380819	1	1.12887	0.0448163	0.586051	0	1.4974
ENSRNOG00000004077	Kcnc2	Potassium voltage-gated channel subfamily C member 2 [Source:UniProtKB/Swiss-Prot;Acc:P22462]	7	51.3266	51.488	37.4131	37.6119	0.760884	0.981735	0	0	0.286875	1	1.09593	-0.095791	0.243588	0	4.86276
ENSRNOG00000004078	Eno3	Beta-enolase [Source:UniProtKB/Swiss-Prot;Acc:P15429]	10	57.537	57.5423	49.3102	49.3143	NA	NA	0	0	0.302431	1	1.27367	-0.0551563	0.502614	0	1.29989
ENSRNOG00000004083	D4A7G0_RAT	zinc finger CCCH type containing 14 [Source:MGI Symbol;Acc:MGI:1919824]	6	122.919	122.957	80.4275	80.4612	0.847147	0.99367	0	0	0.83786	1	0.999668	-0.149095	0.068615	0	4.0764
ENSRNOG00000004084	Fam84a	protein FAM84A [Source:RefSeq peptide;Acc:NP_001120771]	6	37.6963	37.7865	25.757	25.8292	0.0400395	1.1503	0	0	0.267519	1	1.10548	-0.136188	0.0965633	0	4.40162
ENSRNOG00000004085	Toag1	T cell activation inhibitor, mitochondrial [Source:RefSeq peptide;Acc:NP_001104308]	8	127.505	127.535	98.5146	98.538	NA	NA	0	0	0.189693	1	1.25114	-0.0664546	0.4191	0	2.49946
ENSRNOG00000004089	ENPP2_RAT	ectonucleotide pyrophosphatase/phosphodiesterase 2 [Source:MGI Symbol;Acc:MGI:1321390]	7	91.2958	91.3778	65.6349	65.6861	0.0579201	1.23546	0	0	0.148665	1	1.27126	0.0127579	0.87686	0	6.02093
ENSRNOG00000004090			14	93.8813	93.8823	63.8554	63.8566	NA	NA	0	0	0.735199	1	1.08777	-0.107351	0.191024	0	4.24106
ENSRNOG00000004091	Ccdc49	pre-mRNA-splicing factor CWC25 homolog [Source:RefSeq peptide;Acc:NP_001101765]	10	86.4915	86.5158	72.0424	72.0643	NA	NA	0	0	0.906034	1	0.967058	-0.151667	0.0639209	0	2.51124
ENSRNOG00000004093	Rhot1	mitochondrial Rho GTPase 1 [Source:RefSeq peptide;Acc:NP_001100496]	10	68.3953	68.4883	57.606	57.6771	0.316279	0.96507	0	0	0.794398	1	0.937112	-0.0154958	0.850714	0	4.40602
ENSRNOG00000004094	Ptger1	Prostaglandin E2 receptor EP1 subtype [Source:UniProtKB/Swiss-Prot;Acc:P70597]	19	26.1607	26.1632	16.6811	16.682	NA	NA	0	0	0.476832	1	1.17035	-0.0334682	0.684313	0	1.89596
ENSRNOG00000004099	R3hdm1	R3H domain-containing protein 1 [Source:RefSeq peptide;Acc:NP_001128339]	13	40.804	40.942	7.07821	7.21426	0.743134	0.983717	0	0	0.901713	1	0.959466	-0.100451	0.221303	0	4.80464
ENSRNOG00000004100	Trib1	tribbles homolog 1 [Source:RefSeq peptide;Acc:NP_076475]	7	96.4422	96.4488	68.8514	68.8555	NA	NA	0	0	0.143633	1	1.43258	0.0442953	0.590418	0	2.06445
ENSRNOG00000004103	Trappc6b	trafficking protein particle complex subunit 6B [Source:RefSeq peptide;Acc:NP_001100203]	6	79.7418	79.7529	52.5344	52.5386	0.232943	1.04655	0	0	0.796209	1	0.993074	-0.049284	0.549227	0	4.34473
ENSRNOG00000004104	E9PTG0_RAT	zinc finger protein 167 [Source:RefSeq peptide;Acc:NP_001164048]	8	127.592	127.607	98.5825	98.5942	NA	NA	0	0	0.967826	1	0.968151	-0.014182	0.863242	0	0.716121
ENSRNOG00000004106	E9PTM2_RAT	zinc finger, C3H1-type containing [Source:MGI Symbol;Acc:MGI:2446143]	7	54.6562	54.7132	41.5157	41.5859	NA	NA	0	0	0.839321	1	0.967181	0.0622517	0.449181	0	3.13014
ENSRNOG00000004107	Rpl23	60S ribosomal protein L23 [Source:UniProtKB/Swiss-Prot;Acc:P62832]	10	86.5276	86.5315	72.0748	72.0784	NA	NA	0	0	0.714492	1	0.934722	-0.0579511	0.481179	0	7.05041
ENSRNOG00000004109	Zfpm2	zinc finger protein ZFPM2 [Source:RefSeq peptide;Acc:NP_001123973]	7	76.2105	76.6544	57.9399	58.1572	0.42738	1.01597	0	0	0.788815	1	1.00561	0.0794489	0.333826	0	1.75312
ENSRNOG00000004110	Trib2	tribbles homolog 2 [Source:RefSeq peptide;Acc:NP_001101485]	6	39.4742	39.4969	27.2005	27.2196	0.261235	0.956942	0	0	0.732404	1	0.988166	-0.0827682	0.31396	0	3.34871
ENSRNOG00000004111	Soat1	sterol O-acyltransferase 1 [Source:RefSeq peptide;Acc:NP_112380]	13	71.4209	71.4634	32.4716	32.4991	NA	NA	0	0	0.647577	1	0.898288	-0.0402383	0.624918	0	2.4404
ENSRNOG00000004117	Kcnv1	Potassium voltage-gated channel subfamily V member 1 [Source:UniProtKB/Swiss-Prot;Acc:P97557]	7	81.0122	81.0186	60.2902	60.2933	0.51534	0.965839	0	0	0.758605	1	0.908691	-0.0268314	0.74448	0	3.87491
ENSRNOG00000004118	Frmpd4	FERM and PDZ domain-containing protein 4 [Source:RefSeq peptide;Acc:NP_001100430]	X	47.683	47.8141	NA	NA	NA	NA	0	0	0.831231	1	0.972398	0.0542122	0.509965	0	3.55679
ENSRNOG00000004120	RGD1565844	uncharacterized protein LOC317486 [Source:RefSeq peptide;Acc:NP_001101725]	X	51.4967	51.4978	NA	NA	NA	NA	0	0	0.704842	1	0.954426	0.119696	0.144576	0	0.686385
ENSRNOG00000004127	D3ZET9_RAT	Protein Kab [Source:UniProtKB/TrEMBL;Acc:F1LNI7]	13	92.503	92.5647	46.8622	46.9066	NA	NA	0	0	0.550185	1	1.04812	-0.0724904	0.378017	0	4.16975
ENSRNOG00000004130	Anapc4	anaphase-promoting complex subunit 4 [Source:RefSeq peptide;Acc:NP_001100690]	14	62.8798	62.9115	37.5865	37.6076	0.419309	0.987371	0	0	0.837213	1	0.924043	0.165222	0.043329	0	3.45896
ENSRNOG00000004131	Pkn1	Serine/threonine-protein kinase N1 [Source:UniProtKB/Swiss-Prot;Acc:Q63433]	19	26.1325	26.1605	16.6703	16.681	0.88121	0.994656	0	0	0.771211	1	1.0313	0.220385	0.00672876	0	3.19009
ENSRNOG00000004132	LASP1_RAT	LIM and SH3 domain protein 1 [Source:UniProtKB/Swiss-Prot;Acc:Q99MZ8]	10	86.5527	86.5933	72.0974	72.134	0.492383	0.976477	0	0	0.71829	1	0.951048	0.0243922	0.767011	0	5.09187
ENSRNOG00000004133	Slc7a3	cationic amino acid transporter 3 [Source:RefSeq peptide;Acc:NP_058913]	X	89.1596	89.1643	NA	NA	0.248866	1.08538	0	0	0.790834	1	0.982228	-0.0170888	0.835574	0	1.92307
ENSRNOG00000004135	RGD1311745	Uncharacterized protein KIAA1143 homolog [Source:UniProtKB/Swiss-Prot;Acc:Q5RKH3]	8	127.691	127.694	98.6595	98.6621	0.400738	1.05994	0	0	0.679777	1	1.06475	-0.0479488	0.560113	0	3.05441
ENSRNOG00000004137	Ubtd2	Protein Ubtd2 [Source:UniProtKB/TrEMBL;Acc:F1LVF9]	10	17.3435	17.3591	12.1891	12.2098	NA	NA	0	0	0.310613	1	1.17843	0.0166728	0.839522	0	2.63769
ENSRNOG00000004139	Ndel1	Nuclear distribution protein nudE-like 1 [Source:UniProtKB/Swiss-Prot;Acc:Q78PB6]	10	55.5813	55.615	47.9947	48.0163	0.230575	0.962968	0	0	0.902301	1	0.948043	-0.152995	0.0616023	0	5.12286
ENSRNOG00000004140	D3ZE96_RAT		14	67.4756	67.4861	40.6504	40.6574	NA	NA	0	0	0.531407	1	1.31992	-0.0129979	0.874562	0	1.4157
ENSRNOG00000004141	Vasn	vasorin precursor [Source:RefSeq peptide;Acc:NP_001102852]	10	11.0471	11.0576	5.82986	5.83855	NA	NA	0	0	0.28549	1	1.2095	-0.0194284	0.813448	0	2.06603
ENSRNOG00000004143	Adipor1	adiponectin receptor protein 1 [Source:RefSeq peptide;Acc:NP_997470]	13	47.3586	47.3796	13.5392	13.5599	0.0883393	1.05131	0	0	0.851181	1	1.04243	0.0583155	0.47842	0	4.82952
ENSRNOG00000004145	Ncrna00117	prdX-deacylase domain-containing protein 1 [Source:RefSeq peptide;Acc:NP_001099492]	14	110.531	110.533	74	74	NA	NA	0	0	0.788762	1	0.99069	-0.00171208	0.983411	0	1.12191
ENSRNOG00000004146	Coro7	coronin-7 [Source:RefSeq peptide;Acc:NP_001178568]	10	11.0145	11.0703	5.80293	5.84909	0.0738401	0.955069	0	0	0.65023	1	0.979693	0.0806188	0.326735	0	4.04164
ENSRNOG00000004147	D3ZCF8_RAT	Uncharacterized protein [Source:UniProtKB/TrEMBL;Acc:D3ZCF8]	10	99.4783	99.549	87.474	87.5588	NA	NA	0	0	0.924489	1	1.05683	-0.059864	0.466796	0	3.19458
ENSRNOG00000004148	Pctk2	cyclin-dependent kinase 17 [Source:RefSeq peptide;Acc:NP_001101552]	7	30.1942	30.2724	12.1102	12.1747	0.170809	1.05521	0	0	0.699378	1	1.02839	-0.0470812	0.567241	0	5.10119
ENSRNOG00000004149	Mgat4c	alpha-1,3-mannosyl-glycoprotein 4-beta-N-acetylglucosaminyltransferase C [Source:RefSeq peptide;Acc:NP_001129286]	7	40.1715	40.3834	23.6684	23.9296	NA	NA	0	0	0.270951	1	1.35976	0.103686	0.206705	0	1.79592
ENSRNOG00000004150	Slc9a7	sodium/hydrogen exchanger 7 [Source:RefSeq peptide;Acc:NP_001101712]	X	13.6331	13.8089	NA	NA	NA	NA	0	0	0.575344	1	0.908771	0.0560968	0.495345	0	3.11192
ENSRNOG00000004152	Lrp12	low-density lipoprotein receptor-related protein 12 precursor [Source:RefSeq peptide;Acc:NP_001128355]	7	75.458	75.5294	57.5715	57.6065	0.662793	1.02675	0	0	0.525887	1	0.92746	-0.0820748	0.318045	0	3.82038
ENSRNOG00000004155	Samd14	sterile alpha motif domain-containing protein 14 [Source:RefSeq peptide;Acc:NP_001020137]	10	83.6958	83.7078	69.5262	69.537	NA	NA	0	0	0.0656425	1	1.44188	0.0654892	0.425904	0	3.63327
ENSRNOG00000004158	Hdac9	histone deacetylase 9 [Source:RefSeq peptide;Acc:NP_001186974]	6	52.7142	52.9631	38.2142	38.4156	NA	NA	0	0	0.170411	1	0.758983	-0.000567137	0.994504	0	1.24416
ENSRNOG00000004159	Flii	Flightless I homolog (Drosophila); Protein Flii [Source:UniProtKB/TrEMBL;Acc:Q5RKI5]	10	46.8603	46.8742	42.4299	42.4388	0.879194	1.00649	0	0	0.811386	1	1.04849	0.0820233	0.31835	0	3.58205
ENSRNOG00000004160	Prps2	Ribose-phosphate pyrophosphokinase 2 [Source:UniProtKB/Swiss-Prot;Acc:P09330]	X	47.2744	47.3153	NA	NA	0.816949	0.98873	0	0	0.805739	1	0.995407	-0.00402863	0.960977	0	2.77915
ENSRNOG00000004161	Mtif2	translation initiation factor IF-2, mitochondrial [Source:RefSeq peptide;Acc:NP_001004254]	14	110.539	110.559	74	74	0.460719	0.963455	0	0	0.63153	1	1.01191	0.138136	0.0918434	0	2.92981
ENSRNOG00000004162	Pfkfb2	6-phosphofructo-2-kinase/fructose-2,6-bisphosphatase 2 6-phosphofructo-2-kinase Fructose-2,6-bisphosphatase [Source:UniProtKB/Swiss-Prot;Acc:Q9JJH5]	13	43.6273	43.6527	9.86122	9.88619	NA	NA	0	0	0.854282	1	1.02559	0.114439	0.163183	0	2.95256
ENSRNOG00000004165	Prkd1	Serine/threonine-protein kinase D1 [Source:UniProtKB/Swiss-Prot;Acc:Q9WTQ1]	6	70.3641	70.4526	48.5141	48.5547	NA	NA	0	0	1	1	0.997118	0.0116396	0.887579	0	1.81643
ENSRNOG00000004166	D3ZEQ7_RAT	NA	10	28.8891	28.9465	27.038	27.1063	0.667577	0.96473	0	0	0.794673	1	1.05468	-0.0105356	0.898182	0	2.02197
ENSRNOG00000004168	Slc35e4	Solute carrier family 35 member E4 [Source:UniProtKB/Swiss-Prot;Acc:Q5RKL7]	14	84.569	84.5759	54.4497	54.4546	0.462674	1.05092	0	0	0.414472	1	1.21604	-0.0513908	0.532264	0	3.1163
ENSRNOG00000004169	Fzr1	fizzy-related protein homolog [Source:RefSeq peptide;Acc:NP_001101544]	7	9.81657	9.82888	1.60674	1.60927	0.662704	0.98326	0	0	0.798002	1	1.08585	0.0943545	0.250763	0	3.58731
ENSRNOG00000004171	F1M3G2_RAT	Protein Dnah9 [Source:UniProtKB/TrEMBL;Acc:F1LV07]	10	52.1699	52.5167	45.8179	46.0392	NA	NA	0	0	0.182715	1	0.789588	0.110076	0.179936	0	1.29285
ENSRNOG00000004172	Pdk2	pyruvate dehydrogenase kinase, isoenzyme 2 [Source:MGI Symbol;Acc:MGI:1343087]	10	83.7104	83.725	69.5394	69.5525	NA	NA	0	0	0.792617	1	1.03789	-0.151191	0.0647699	0	5.39433
ENSRNOG00000004174	RGD1563092	NA	6	53.0664	53.1144	38.4991	38.538	NA	NA	0	0	0.70614	1	0.932022	0.0750843	0.361144	0	2.63931
ENSRNOG00000004179	Nts	neurotensin/neuromedin N precursor [Source:RefSeq peptide;Acc:NP_001095851]	7	40.4747	40.4841	24.042	24.0536	0.263918	1.06049	0	0	0.22811	1	0.715484	-0.0786951	0.338448	0	2.44273
ENSRNOG00000004180	Fam19a2		7	63.5047	63.5061	50.4832	50.4841	NA	NA	0	0	0.246133	1	1.28449	-0.171906	0.0354231	0	3.33354
ENSRNOG00000004181	Sdccag8	serologically defined colon cancer antigen 8 homolog [Source:RefSeq peptide;Acc:NP_808790]	13	92.6123	92.8026	46.9408	47.0779	NA	NA	0	0	0.713348	1	0.928793	0.0491898	0.549992	0	2.55559
ENSRNOG00000004183	Ccdc59	coiled-coil domain containing 59 [Source:RefSeq peptide;Acc:NP_001101560]	7	44.4962	44.5026	28.9972	29.005	0.705297	1.01665	0	0	0.323939	1	1.06628	-0.0781351	0.341907	0	2.43204
ENSRNOG00000004185	Mon2		7	62.7657	62.841	49.9807	50.0319	NA	NA	0	0	0.677904	1	1.02219	-0.0253043	0.758562	0	3.20262
ENSRNOG00000004186	Snx13	sorting nexin-13 [Source:RefSeq peptide;Acc:NP_001102178]	6	53.7271	53.8272	39.0337	39.1147	NA	NA	0	0	0.418796	1	1.10519	-0.0994961	0.225747	0	4.2376
ENSRNOG00000004189	Helb	helicase (DNA) B [Source:MGI Symbol;Acc:MGI:2152895]	7	59.3131	59.339	47.2536	47.2855	NA	NA	0	0	0.709909	1	1.06288	-0.0176897	0.829878	0	1.6154
ENSRNOG00000004193	Klhl12	Kelch-like protein 12 [Source:UniProtKB/Swiss-Prot;Acc:Q8R2H4]	13	47.4036	47.4333	13.5835	13.6128	NA	NA	0	0	0.355457	1	0.881697	-0.0651318	0.428438	0	3.50073
ENSRNOG00000004196	LOC100363173	40S ribosomal protein S29 [Source:UniProtKB/Swiss-Prot;Acc:P62275]	6	91.1157	91.1171	56.8944	56.8949	NA	NA	0	0	0.445593	1	0.926844	-0.042617	0.604585	0	8.18302
ENSRNOG00000004198	Stxbp6	syntaxin-binding protein 6 [Source:RefSeq peptide;Acc:NP_001178801]	6	64.2503	64.4905	45.709	45.8192	NA	NA	0	0	0.428742	1	0.885549	0.0160025	0.845892	0	3.6797
ENSRNOG00000004199			6	6.28805	6.28882	4.75995	4.75932	NA	NA	0	0	0.99537	1	0.994408	-0.174973	0.0322258	0	2.2468
ENSRNOG00000004200	Golsyn	Protein Golsyn [Source:UniProtKB/TrEMBL;Acc:F1LUC0]	7	80.5521	80.6365	60.065	60.1063	NA	NA	0	0	0.776914	1	0.977469	-0.0228935	0.780953	0	4.05718
ENSRNOG00000004201	Rims2	regulating synaptic membrane exocytosis protein 2 isoform 1 [Source:RefSeq peptide;Acc:NP_446397]	7	74.757	75.2718	57.2284	57.4804	0.467935	1.07177	0	0	0.609077	1	1.03113	0.113207	0.167791	0	4.54449
ENSRNOG00000004205	Sgk493	protein kinase domain-containing protein, cytoplasmic [Source:RefSeq peptide;Acc:NP_001101477]	6	6.55428	6.56363	4.5381	4.53031	NA	NA	0	0	1	1	0.993222	-0.0295693	0.719447	0	1.47355
ENSRNOG00000004206	Glrx5	glutaredoxin-related protein 5, mitochondrial [Source:RefSeq peptide;Acc:NP_001102192]	6	129.233	129.243	86.1099	86.119	0.456793	0.962749	0	0	0.994254	1	0.996983	-0.144657	0.0773685	0	3.29151
ENSRNOG00000004207	EMAL5_RAT	echinoderm microtubule associated protein like 5 [Source:MGI Symbol;Acc:MGI:2442513]	6	122.96	123.087	80.4638	80.5787	NA	NA	0	0	0.487222	1	0.920174	0.130017	0.112787	0	2.55589
ENSRNOG00000004208	Crim1	cysteine rich transmembrane BMP regulator 1 precursor [Source:RefSeq peptide;Acc:NP_001162574]	6	0.962545	1.14087	7.5	7.5	0.975554	1.00969	0	0	0.511948	1	0.889938	-0.00544025	0.94732	0	3.4581
ENSRNOG00000004209			X	52.3747	52.3757	NA	NA	NA	NA	0	0	0.715929	1	0.903957	-0.276276	0.000621114	0	0.776524
ENSRNOG00000004210	Osr1	Protein odd-skipped-related 1 [Source:UniProtKB/Swiss-Prot;Acc:B0K011]	6	33.0744	33.0768	22.0595	22.0614	NA	NA	0	0	0.842686	1	0.96651	-0.0096431	0.906766	0	1.18561
ENSRNOG00000004212	Fbxw9	F-box and WD repeat domain containing 9 [Source:RefSeq peptide;Acc:NP_001075103]	19	24.7468	24.7537	16.1438	16.1464	0.19114	1.02828	0	0	0.542505	1	1.13959	0.0599547	0.466121	0	2.00281
ENSRNOG00000004214	Rpl26	60S ribosomal protein L26 [Source:RefSeq peptide;Acc:NP_001099258]	10	55.6622	55.6658	48.0464	48.0486	NA	NA	0	0	0.196696	1	0.839652	0.146679	0.0732754	0	5.7483
ENSRNOG00000004217	Stk10	serine/threonine-protein kinase 10 [Source:RefSeq peptide;Acc:NP_062079]	10	17.3794	17.4818	12.2364	12.3714	0.550957	1.04956	0	0	0.814791	1	0.936109	-0.115714	0.158515	0	1.19407
ENSRNOG00000004218	Klhl28	kelch-like protein 28 [Source:RefSeq peptide;Acc:NP_001100205]	6	86.2819	86.3149	55.0414	55.0541	NA	NA	0	0	0.341256	1	1.12946	0.0520913	0.526683	0	2.45492
ENSRNOG00000004219	Dhps	Deoxyhypusine synthase [Source:UniProtKB/Swiss-Prot;Acc:Q6AY53]	19	24.7387	24.7428	16.1407	16.1423	0.815787	1.01483	0	0	0.474637	1	0.921133	0.0655372	0.425564	0	3.7877
ENSRNOG00000004220	Ebag9	Receptor-binding cancer antigen expressed on SiSo cells [Source:UniProtKB/Swiss-Prot;Acc:Q5PQP2]	7	80.5153	80.5333	60.0469	60.0558	0.277608	1.04882	0	0	0.689724	1	0.993713	0.11608	0.157193	0	3.55653
ENSRNOG00000004221	Lgr5	leucine-rich repeat-containing G-protein coupled receptor 5 precursor [Source:RefSeq peptide;Acc:NP_001100254]	7	54.7377	54.8767	41.6162	41.7873	NA	NA	0	0	0.0976127	1	0.573807	0.0124592	0.879721	0	1.14181
ENSRNOG00000004226	Irak3	interleukin-1 receptor-associated kinase 3 [Source:RefSeq peptide;Acc:NP_001101571]	7	59.4082	59.4679	47.3708	47.4444	NA	NA	0	0	0.884563	1	0.938439	-0.0872217	0.288539	0	1.08511
ENSRNOG00000004229	Tac2	tachykinin-3 precursor [Source:RefSeq peptide;Acc:NP_062035]	7	67.7171	67.7237	53.3476	53.3521	NA	NA	0	0	0.0849946	1	1.42354	0.0027699	0.973164	0	3.50035
ENSRNOG00000004232	G2e3	G2/M phase-specific E3 ubiquitin-protein ligase [Source:RefSeq peptide;Acc:NP_001100196]	6	71.421	71.4514	48.9991	49.013	NA	NA	0	0	0.957112	1	0.994166	0.0638713	0.437448	0	1.69986
ENSRNOG00000004234	Mgat2	Alpha-1,6-mannosyl-glycoprotein 2-beta-N-acetylglucosaminyltransferase [Source:UniProtKB/Swiss-Prot;Acc:Q09326]	6	91.1373	91.1397	56.9026	56.9036	0.199756	1.06588	0	0	0.498705	1	1.05354	-0.135523	0.0982172	0	2.93595
ENSRNOG00000004239			6	58.5406	58.5417	42.9283	42.9292	NA	NA	0	0	0.714399	1	1.02073	-0.0265861	0.746737	0	1.69086
ENSRNOG00000004245	Mgst3	microsomal glutathione S-transferase 3 [Source:RefSeq peptide;Acc:NP_001178523]	13	83.038	83.0588	40.0474	40.0624	NA	NA	0	0	0.794503	1	0.961046	-0.131215	0.109481	0	6.48438
ENSRNOG00000004246	Spag7	sperm associated antigen 7 [Source:RefSeq peptide;Acc:NP_001100486]	10	57.5436	57.5498	49.3153	49.3201	0.310499	0.957045	0	0	0.812956	1	0.958687	0.263351	0.00112968	0	4.38387
ENSRNOG00000004247	Nhp2	NHP2 ribonucleoprotein homolog [Source:RefSeq peptide;Acc:NP_001099249]	10	37.1373	37.1407	36.2257	36.2278	NA	NA	0	0	0.647093	1	0.941085	0.030044	0.715136	0	4.12582
ENSRNOG00000004249	Tlr7	toll-like receptor 7 [Source:RefSeq peptide;Acc:NP_001091051]	X	47.3307	47.3568	NA	NA	NA	NA	0	0	0.802302	1	0.849401	-0.0157358	0.848429	0	1.1345
ENSRNOG00000004252	Eif3h	Eukaryotic translation initiation factor 3 subunit H [Source:UniProtKB/Swiss-Prot;Acc:Q6P9U8]	7	88.0697	88.1543	63.7446	63.786	0.0218761	0.934486	0	0	0.721705	1	0.952273	-0.0954425	0.245315	0	5.55467
ENSRNOG00000004255	Usf1	upstream stimulatory factor 1 [Source:RefSeq peptide;Acc:NP_113965]	13	87.3367	87.3445	43.1424	43.148	0.765057	0.973103	0	0	0.577447	1	1.09644	0.214371	0.00843292	0	3.8905
ENSRNOG00000004257	Ctps2	CTP synthase 2 [Source:UniProtKB/Swiss-Prot;Acc:Q5U2N0]	X	52.3875	52.5414	NA	NA	0.165331	1.08821	0	0	0.766547	1	1.06524	0.106179	0.195941	0	3.63928
ENSRNOG00000004258	Chst7	Carbohydrate sulfotransferase 7 [Source:UniProtKB/Swiss-Prot;Acc:Q6XQG8]	X	13.8172	13.8537	NA	NA	NA	NA	0	0	0.331573	1	1.19232	0.0321579	0.69605	0	1.03681
ENSRNOG00000004259	Dohh	Deoxyhypusine hydroxylase [Source:UniProtKB/Swiss-Prot;Acc:Q5PPJ4]	7	9.80601	9.81074	1.60457	1.60554	0.923466	1.00289	0	0	0.574718	1	1.17595	-0.0118139	0.885908	0	3.98099
ENSRNOG00000004262	LOC100366178		6	142.904	142.905	95.3895	95.3897	NA	NA	0	0	0.737451	1	0.975976	0.0907632	0.269333	0	5.25764
ENSRNOG00000004263	Ints7	integrator complex subunit 7 [Source:RefSeq peptide;Acc:NP_001178604]	13	107.641	107.696	53.7	53.7	0.0523918	1.27007	0	0	0.168319	1	0.866612	0.0233931	0.776297	0	2.51018
ENSRNOG00000004268	Zfp386	zinc finger protein 386 (Kruppel-like) [Source:RefSeq peptide;Acc:NP_062566]	6	143.312	143.326	95.505	95.5091	0.743473	0.96976	0	0	1	1	0.884198	0.241406	0.00292012	0	2.91513
ENSRNOG00000004269	Myt1l	myelin transcription factor 1-like protein [Source:RefSeq peptide;Acc:NP_446340]	6	47.4352	47.828	33.923	34.2548	0.211541	1.05199	0	0	0.552466	1	1.06756	-0.00466866	0.954783	0	4.71107
ENSRNOG00000004273	Ifitm1	interferon-induced transmembrane protein 1 [Source:RefSeq peptide;Acc:NP_001099784]	1	201.154	201.156	124.53	124.53	NA	NA	0	0	0.523876	1	0.847412	-0.129375	0.11459	0	1.38955
ENSRNOG00000004275	Egfl6	epidermal growth factor-like protein 6 precursor [Source:RefSeq peptide;Acc:NP_001101724]	X	48.5687	48.6268	NA	NA	0.198004	1.07247	0	0	0.0815113	1	1.64351	-0.00938887	0.909214	0	1.02421
ENSRNOG00000004276	D3ZCG9_RAT	Integrin alpha 3 variant A; Uncharacterized protein [Source:UniProtKB/TrEMBL;Acc:D3ZCG9]	10	83.7287	83.7596	69.5558	69.5836	NA	NA	0	0	0.509423	1	1.16502	-0.0522068	0.525765	0	2.54178
ENSRNOG00000004279	D4AB42_RAT	G protein-coupled receptor 125 [Source:MGI Symbol;Acc:MGI:1917943]	14	65.7703	65.8726	39.5135	39.5817	NA	NA	0	0	0.435856	1	0.889714	-0.116418	0.15598	0	1.8732
ENSRNOG00000004280	Tcn2	transcobalamin-2 precursor [Source:RefSeq peptide;Acc:NP_071979]	14	84.5792	84.5936	54.457	54.4674	0.002337	1.15415	1	0	0.898416	1	1.01047	0.0942496	0.251292	0	3.36299
ENSRNOG00000004281	Cobl	protein cordon-bleu [Source:RefSeq peptide;Acc:NP_001100706]	14	93.1546	93.3094	63.047	63.2192	0.110976	1.04367	0	0	0.852665	1	0.997105	-0.0988507	0.228786	0	3.88652
ENSRNOG00000004282	Arl4a	ADP-ribosylation factor-like protein 4A [Source:UniProtKB/Swiss-Prot;Acc:P61214]	6	59.2126	59.2147	43.3975	43.3985	0.412475	0.954602	0	0	0.591186	1	0.840971	-0.0235957	0.774411	0	3.05923
ENSRNOG00000004283	Camta2	calmodulin-binding transcription activator 2 [Source:RefSeq peptide;Acc:NP_001099271]	10	57.5499	57.568	49.3201	49.3339	0.572238	0.99334	0	0	1	1	0.982661	-0.182374	0.0255025	0	5.67543
ENSRNOG00000004284	Btg1	Protein BTG1 [Source:UniProtKB/Swiss-Prot;Acc:Q63073]	7	34.0293	34.0316	16.1004	16.1032	0.473351	0.962372	0	0	0.779449	1	0.965203	0.0608134	0.459747	0	4.19125
ENSRNOG00000004287	Morg1	WD repeat domain-containing protein 83 [Source:RefSeq peptide;Acc:NP_001041312]	19	24.7333	24.7389	16.1387	16.1408	NA	NA	0	0	0.815104	1	1.06596	0.0409921	0.618443	0	2.76811
ENSRNOG00000004288	Ptrh2	peptidyl-tRNA hydrolase 2, mitochondrial [Source:RefSeq peptide;Acc:NP_001013882]	10	74.9644	74.9744	62.6248	62.6325	0.276991	0.947103	0	0	0.555492	1	0.824757	-0.00216543	0.979019	0	2.06456
ENSRNOG00000004289	D4ADF1_RAT	lysine (K)-specific demethylase 6A [Source:MGI Symbol;Acc:MGI:1095419]	X	15.9121	16.0529	NA	NA	NA	NA	0	0	0.628114	1	0.902811	0.0700227	0.394508	0	2.31015
ENSRNOG00000004290	Grb10	Growth factor receptor-bound protein 10 [Source:UniProtKB/Swiss-Prot;Acc:P0CE43]	14	92.8148	92.9114	62.669	62.7765	0.350814	1.04509	0	0	0.906138	1	1.00507	-0.0961892	0.241625	0	3.69873
ENSRNOG00000004291	Cltc	clathrin heavy chain 1 [Source:RefSeq peptide;Acc:NP_062172]	10	74.9768	75.0325	62.6343	62.6769	0.63965	0.989133	0	0	0.784604	1	0.931273	-0.0884413	0.281824	0	6.70741
ENSRNOG00000004292	MGC112883	Serine palmitoyltransferase small subunit A [Source:UniProtKB/Swiss-Prot;Acc:Q4G019]	6	74.9624	74.9738	50.6239	50.6292	0.449093	1.04079	0	0	0.78928	1	0.924937	0.0695445	0.397753	0	4.07809
ENSRNOG00000004294	Ascl1	Achaete-scute homolog 1 [Source:UniProtKB/Swiss-Prot;Acc:P19359]	7	24.1456	24.1474	7.1201	7.12162	NA	NA	0	0	0.224034	1	1.31113	0.0268332	0.744464	0	1.39477
ENSRNOG00000004295	D3ZU16_RAT	ATP-binding cassette, sub-family A (ABC1), member 9 [Source:MGI Symbol;Acc:MGI:2386796]	10	99.5587	99.6178	87.5704	87.6413	NA	NA	0	0	0.0271495	1	0.528208	0.0242731	0.768116	0	0.902841
ENSRNOG00000004300	Gtf2a1	Transcription initiation factor IIA subunit 1 Transcription initiation factor IIA alpha chain Transcription initiation factor IIA beta chain [Source:UniProtKB/Swiss-Prot;Acc:O08949]	6	115.181	115.211	73.6013	73.6276	NA	NA	0	0	0.249566	1	1.15935	0.054582	0.507079	0	3.36567
ENSRNOG00000004301	Dcaf13	DDB1- and CUL4-associated factor 13 [Source:RefSeq peptide;Acc:NP_001167029]	7	74.6687	74.704	57.1852	57.2025	0.488232	1.0266	0	0	0.827487	1	1.02845	-0.079833	0.331488	0	3.66283
ENSRNOG00000004303	Timp3	metalloproteinase inhibitor 3 precursor [Source:RefSeq peptide;Acc:NP_037018]	7	19.6772	19.7271	3.63364	3.6439	0.114855	1.16736	0	0	0.458102	1	1.07722	0.122926	0.133969	0	4.61564
ENSRNOG00000004304	Syap1	synapse-associated protein 1 [Source:RefSeq peptide;Acc:NP_001004253]	X	52.547	52.5807	NA	NA	0.285744	0.936468	0	0	0.801393	1	1.01062	-0.0101373	0.902011	0	2.93514
ENSRNOG00000004305	Abl2	tyrosine-protein kinase ABL2 [Source:RefSeq peptide;Acc:NP_001100656]	13	71.8371	71.9153	32.7403	32.7908	NA	NA	0	0	0.561173	1	0.924084	-0.105564	0.198559	0	2.42593
ENSRNOG00000004306	Zbtb39	zinc finger and BTB domain-containing protein 39 [Source:RefSeq peptide;Acc:NP_001124009]	7	67.7315	67.739	53.3574	53.3625	0.888169	1.00474	0	0	0.703256	1	1.08168	-0.0962106	0.24152	0	1.95891
ENSRNOG00000004307	Tor3a	Torsin-3A [Source:UniProtKB/Swiss-Prot;Acc:Q5M936]	13	71.8496	71.874	32.7484	32.7641	0.573426	1.03655	0	0	0.633112	1	0.945874	0.183637	0.024485	0	1.63786
ENSRNOG00000004309	Actn1	Alpha-actinin-1 [Source:UniProtKB/Swiss-Prot;Acc:Q9Z1P2]	6	103.188	103.283	63.0932	63.1765	0.783546	1.01153	0	0	0.595494	1	1.04348	-0.104072	0.205012	0	4.61942
ENSRNOG00000004310	Caskin2	caskin-2 [Source:RefSeq peptide;Acc:NP_001100535]	10	105.901	105.915	95.1813	95.1984	0.489934	1.02907	0	0	0.80727	1	1.08704	-0.0990232	0.227971	0	2.24701
ENSRNOG00000004311	Gpr182	G-protein coupled receptor 182 [Source:RefSeq peptide;Acc:NP_445754]	7	67.7405	67.7434	53.3636	53.3655	NA	NA	0	0	0.2371	1	0.815808	0.000972489	0.990577	0	0.824048
ENSRNOG00000004312	Tmbim4	transmembrane BAX inhibitor motif-containing protein 4 [Source:RefSeq peptide;Acc:NP_954547]	7	59.4733	59.4879	47.4511	47.4691	0.727071	0.984506	0	0	0.837518	1	1.05533	0.125465	0.12606	0	3.8497
ENSRNOG00000004314	PPM1H_RAT	Protein phosphatase 1H [Source:UniProtKB/Swiss-Prot;Acc:Q5M821]	7	62.4482	62.7116	49.7648	49.9439	0.64067	1.02253	0	0	0.78403	1	1.01858	-0.0950639	0.247202	0	4.35822
ENSRNOG00000004316	B0BN98_RAT	Protein RGD1308261; RCG49081; RGD1308261 protein [Source:UniProtKB/TrEMBL;Acc:B0BN98]	7	59.4901	59.4946	47.4717	47.4772	NA	NA	0	0	0.901959	1	0.953645	0.0213076	0.795782	0	2.55349
ENSRNOG00000004317	Vipr2	Vasoactive intestinal polypeptide receptor 2 [Source:UniProtKB/Swiss-Prot;Acc:P35000]	6	143.348	143.417	95.5152	95.5347	NA	NA	0	0	0.465487	1	0.960728	0.123751	0.131359	0	1.24949
ENSRNOG00000004319			X	55.835	55.8355	NA	NA	NA	NA	0	0	0.731434	1	1.09	-0.0945821	0.249616	0	2.82074
ENSRNOG00000004320	Tgm4	Protein-glutamine gamma-glutamyltransferase 4 [Source:UniProtKB/Swiss-Prot;Acc:Q99041]	8	127.782	127.819	98.7308	98.7596	NA	NA	0	0	0.44166	1	0.781628	0.0563208	0.493622	0	0.839047
ENSRNOG00000004322	Sh3kbp1	SH3 domain-containing kinase-binding protein 1 [Source:UniProtKB/Swiss-Prot;Acc:Q925Q9]	X	56.0755	56.423	NA	NA	0.112997	1.08289	0	0	0.931005	1	1.00295	-0.149189	0.0684382	0	4.09815
ENSRNOG00000004327	Ddc	Aromatic-L-amino-acid decarboxylase [Source:UniProtKB/Swiss-Prot;Acc:P14173]	14	92.6986	92.7886	62.5397	62.6399	0.81669	0.980331	0	0	0.262088	1	0.80466	0.143868	0.0790162	0	2.45422
ENSRNOG00000004328	Depdc6	Protein Depdc6 [Source:UniProtKB/TrEMBL;Acc:F1M8Y4]	7	91.6726	91.7426	65.8704	65.9141	NA	NA	0	0	0.430782	1	0.879944	0.0254643	0.757083	0	2.59382
ENSRNOG00000004329			7	67.7997	67.8	53.4038	53.404	NA	NA	0	0	0.53535	1	0.733363	0.00392907	0.96194	0	0.759922
ENSRNOG00000004330	Chrdl1	chordin-like protein 1 [Source:RefSeq peptide;Acc:NP_955796]	X	35.1433	35.2464	NA	NA	NA	NA	0	0	0.888148	1	0.964111	0.0432126	0.59954	0	1.41839
ENSRNOG00000004332	Egfr	epidermal growth factor receptor precursor [Source:RefSeq peptide;Acc:NP_113695]	14	97.6174	97.7882	68.0118	68.2019	NA	NA	0	0	0.598739	1	0.936276	0.116597	0.155339	0	1.06651
ENSRNOG00000004333	D3ZP09_RAT	Uncharacterized protein [Source:UniProtKB/TrEMBL;Acc:D3ZP09]	10	13.0133	13.0295	7.45642	7.46986	0.114451	1.08265	0	0	0.375592	1	1.15561	0.0159598	0.846298	0	5.57247
ENSRNOG00000004337	Fam20b	glycosaminoglycan xylosylkinase [Source:RefSeq peptide;Acc:NP_001100657]	13	71.8772	71.9133	32.7662	32.7895	0.212354	1.03132	0	0	0.744859	1	1.04805	-0.194932	0.0168291	0	3.98452
ENSRNOG00000004339	Yy1	transcriptional repressor protein YY1 [Source:RefSeq peptide;Acc:NP_775412]	6	133.132	133.157	89.6192	89.641	NA	NA	0	0	0.40597	1	1.26639	-0.125293	0.126585	0	4.09903
ENSRNOG00000004342	Ahr	aryl hydrocarbon receptor precursor [Source:RefSeq peptide;Acc:NP_037281]	6	54.204	54.2403	39.4196	39.449	NA	NA	0	0	0.327223	1	1.06346	-0.0405441	0.622288	0	1.26775
ENSRNOG00000004344	Zdhhc3	palmitoyltransferase ZDHHC3 [Source:RefSeq peptide;Acc:NP_001034103]	8	127.83	127.853	98.7681	98.7853	NA	NA	0	0	0.282921	1	0.864597	-0.0801565	0.329525	0	4.15549
ENSRNOG00000004345	Daam1	disheveled-associated activator of morphogenesis 1 [Source:RefSeq peptide;Acc:NP_001101500]	6	94.0817	94.1842	58.0313	58.0706	0.704377	1.01677	0	0	0.929085	1	0.975009	0.0833122	0.310779	0	3.57273
ENSRNOG00000004346	Notch3	neurogenic locus notch homolog protein 3 precursor [Source:RefSeq peptide;Acc:NP_064472]	7	12.6883	12.74	2.19703	2.20767	NA	NA	0	0	0.440101	1	0.824313	0.103955	0.205526	0	1.56117
ENSRNOG00000004351	Slc25a29	Mitochondrial carnitine/acylcarnitine carrier protein CACL [Source:UniProtKB/Swiss-Prot;Acc:Q5HZE0]	6	133.167	133.178	89.6501	89.6598	0.469593	0.936434	0	0	0.996033	1	1.01964	0.112986	0.168626	0	2.32868
ENSRNOG00000004353	Ppfia2	liprin-alpha-2 [Source:RefSeq peptide;Acc:NP_001102215]	7	45.4397	45.6166	30.1596	30.3776	NA	NA	0	0	0.493091	1	0.905162	0.0365759	0.65678	0	3.89235
ENSRNOG00000004359	Wars	Tryptophan--tRNA ligase, cytoplasmic T1-TrpRS T2-TrpRS [Source:UniProtKB/Swiss-Prot;Acc:Q6P7B0]	6	133.201	133.232	89.6808	89.7088	0.233445	0.978096	0	0	0.427641	1	0.91198	-0.142918	0.081035	0	4.2237
ENSRNOG00000004360	Sip1	Gem-associated protein 2 [Source:UniProtKB/Swiss-Prot;Acc:Q9QZP1]	6	79.7084	79.722	52.5216	52.5268	0.628412	1.02143	0	0	0.67652	1	1.08318	0.038128	0.643198	0	1.99384
ENSRNOG00000004361	LOC100362108	poly (ADP-ribose) polymerase family, member 10 [Source:MGI Symbol;Acc:MGI:3712326]	7	114.264	114.273	81.8629	81.8717	NA	NA	0	0	0.857006	1	0.989545	-0.064234	0.434844	0	0.949064
ENSRNOG00000004362	Rps6ka5	ribosomal protein S6 kinase alpha-5 [Source:RefSeq peptide;Acc:NP_001101518]	6	124.821	125	82.1386	82.2998	0.7505	1.02097	0	0	0.389688	1	1.13454	-0.0971155	0.237101	0	3.19426
ENSRNOG00000004364	Bre	BRCA1-A complex subunit BRE [Source:UniProtKB/Swiss-Prot;Acc:Q6P7Q1]	6	24.4068	24.7919	15.1255	15.4335	0.534212	0.98227	0	0	0.973881	1	1.01749	0.0358665	0.663026	0	4.10508
ENSRNOG00000004367	Elk3	ETS domain-containing protein Elk-3 [Source:RefSeq peptide;Acc:NP_001102213]	7	30.2789	30.3144	12.1801	12.2094	0.0299798	1.046	0	0	0.744701	1	1.02014	-0.146524	0.0735823	0	1.55957
ENSRNOG00000004372	Cbln4	cerebellin-4 precursor [Source:RefSeq peptide;Acc:NP_001102680]	3	162.914	162.922	111.518	111.525	NA	NA	0	0	0.0272482	1	1.47554	-0.0509481	0.535807	0	2.31061
ENSRNOG00000004373	Ddx39	ATP-dependent RNA helicase DDX39A [Source:UniProtKB/Swiss-Prot;Acc:Q5U216]	19	26.1091	26.117	16.6615	16.6645	0.18906	1.10232	0	0	0.646229	1	0.9972	0.015046	0.854999	0	1.86872
ENSRNOG00000004377	Lpin1	phosphatidate phosphatase LPIN1 [Source:RefSeq peptide;Acc:NP_001012111]	6	40.2537	40.2972	27.8587	27.8954	NA	NA	0	0	0.587525	1	1.15007	-0.0651461	0.428337	0	2.77289
ENSRNOG00000004378	Abca5	ATP-binding cassette sub-family A member 5 [Source:UniProtKB/Swiss-Prot;Acc:Q8CF82]	10	99.7248	99.7936	87.7697	87.8523	NA	NA	0	0	0.793144	1	0.960847	0.125159	0.126993	0	2.35882
ENSRNOG00000004381			3	85.3458	85.3463	60.5383	60.5385	NA	NA	0	0	0.779467	1	1.02232	0.0174835	0.831832	0	1.43419
ENSRNOG00000004382	RGD1307597	uncharacterized protein LOC299197 [Source:RefSeq peptide;Acc:NP_001100214]	6	108.964	108.989	68.1538	68.1757	NA	NA	0	0	0.75004	1	0.976691	-0.148567	0.0696123	0	4.82527
[truncated: 12,001 more rows]
