# Supplementary material for: Genetic Influences on Brain Gene Expression in Rats Selected for Tameness and Aggression
Source: Oxford University Press journal article supplement (doi:10.1534/genetics.114.168948), 2014-09-03
Supplement: tables8.xlsx [file tables8.xlsx]

## Sheet: Sheet1
ensembl_gene_ID	gene_name	description	gene_chr	gene_start_Mb	gene_end_Mb	gene_start_cM	gene_end_cM	eQTL_chr	eQTL_start_cM	eQTL_peak_cM	eQTL_end_cM	eQTL_start_Mb	eQTL_peak_Mb	eQTL_end_Mb	FIA_score	eQTL	allele_effect_correlation_at_tamenessQTLpeaks_cor_coeff	allele_effect_correlation_at_tamenessQTLpeaks_p_value	allele_effect_correlation_at_tamenessQTLpeaks_p_value_adjusted	allele_effect_correlation_at_eQTLpeaks_cor_coeff	allele_effect_correlation_at_eQTLpeaks_p_value	allele_effect_correlation_at_eQTLpeaks_p_value_adjusted	parental_microarray_pval	parental_microarray_fold_change_aggr_vs_tame	parental_microarray_fdr_10	parental_microarray_fdr_5	parental_rnaseq_pvalue	parental_rnaseq_pvalue_adjusted	parental_rnaseq_fold_change_aggr_vs_tame	tameness_correlation_F2_rho	tameness_correlation_F2_pvalue	tameness_correlation_F2_FDR0	FPKM_median
ENSRNOG00000029957	Zfp51	zinc finger protein 51 [Source:RefSeq peptide;Acc:NP_001100937]	1	59.3708	59.3831	49.6795	49.6823	1	40.6451	52	63.3549	43.9422	69.4054	93.8187	351.041	local	0.908171	0.001805	0.02014	0.871128	0.0022253	0.0589704	NA	NA	no	no	0.494861	1	0.659109	0.13039	0.11174	no	0.743312
ENSRNOG00000021474	Siglec5	sialic acid-binding Ig-like lectin 5 precursor [Source:RefSeq peptide;Acc:NP_001099719]	1	93.7349	93.7432	63.2879	63.2946	1	61	66	71	90.875	97.125	103.375	2320.46	local	0.896621	0.00255239	0.0231021	0.901903	0.0054876	0.0882866	NA	NA	no	no	0.0822057	1	0.761931	0.16263	0.04677	no	0.822319
ENSRNOG00000019338	Dll3	delta-like protein 3 precursor [Source:RefSeq peptide;Acc:NP_446118]	1	83.3735	83.3812	56.0494	56.0525	1	53	58	63	73.8462	87.125	93.375	4127.08	local	-0.846635	0.00801274	0.0530844	-0.969529	0.000306224	0.0298765	NA	NA	no	no	7.84693e-14	7.57e-10	45.2848	-0.24	0.00309	no	0.898655
ENSRNOG00000020883	Dhdh		1	95.9477	95.9579	65.0581	65.0663	1	62.2207	68	73.7793	92.4008	99.625	110.123	1583.41	local	-0.987648	4.67e-06	0.000790929	-0.862904	0.012398	0.127496	NA	NA	no	no	1.39851e-07	0.000337	3.34787	-0.2006	0.01384	no	0.948188
ENSRNOG00000023985	Mtmr15	coiled-coil domain-containing protein MTMR15 [Source:RefSeq peptide;Acc:NP_001178562]	1	118.785	118.812	77.6052	77.6169	1	61.3708	74	86.6292	91.3385	110.623	131.341	248.791	local	0.590293	0.12343	0.284419	0.947539	0.000346896	0.0298765	NA	NA	no	no	0.828072	1	1.00162	0.17075	0.03669	no	1.08156
ENSRNOG00000033729	Zfp719	zinc finger protein 719 [Source:MGI Symbol;Acc:MGI:2444708]	1	93.9859	93.9928	63.4887	63.4943	1	56.2637	68	79.7363	83.9093	99.625	121.777	316.666	local	-0.963107	0.000122085	0.00431366	-0.877157	0.00949812	0.116196	NA	NA	no	no	0.938549	1	0.999423	-0.2152	0.00817	no	1.68756
ENSRNOG00000043245	D3ZT48_RAT		1	53.9202	53.9231	47.4761	47.4781	1	40.0074	50	59.9926	43.0108	60.7568	89.6158	507.232	local	-0.923122	0.00107143	0.0133614	-0.883096	0.00365214	0.0752229	0.607631	1.03679	no	no	0.39049	1	0.832883	-0.0193	0.81447	no	1.78004
ENSRNOG00000016608	Znf579	zinc finger protein 579 [Source:RefSeq peptide;Acc:NP_001119748]	1	67.5862	67.5894	51.5793	51.58	1	38.4414	50	61.5586	40.8607	60.7568	91.5733	332.243	local	0.963455	0.0001187	0.00431366	0.962103	0.000132231	0.0298765	0.307269	0.933659	no	no	0.786755	1	1.07334	0.15457	0.05894	no	1.85448
ENSRNOG00000011675	Zfp40	zinc finger protein 40 [Source:RefSeq peptide;Acc:NP_001162113]	1	61.1431	61.1494	50.0894	50.0908	1	47	52	57	53.2247	69.4054	85.75	2370.92	local	0.871645	0.00479073	0.0376161	0.912418	0.000600357	0.0379751	NA	NA	no	no	0.28593	1	0.59531	0.34822	1e-05	yes	1.94009
ENSRNOG00000020623	Aldh16a1	Aldehyde dehydrogenase family 16 member A1 [Source:UniProtKB/Swiss-Prot;Acc:Q3T1L0]	1	95.6177	95.6308	64.7942	64.8046	1	57.9005	64	70.0995	87.0006	94.625	102.249	1452.95	local	0.983553	1.1e-05	0.000790929	0.916248	0.00137798	0.0445876	0.00154141	0.755548	yes	no	0.35108	1	0.855985	0.12349	0.13219	no	2.08696
ENSRNOG00000021442	Hddc2	HD domain-containing protein 2 [Source:RefSeq peptide;Acc:NP_001101930]	1	26.9553	26.9751	24.3796	24.4027	1	23.0614	36	48.9386	25.822	37.5098	56.1668	228.84	local	0.886466	0.00335418	0.0284435	0.742024	0.0139997	0.133969	NA	NA	no	no	0.22935	1	0.764036	0.09541	0.2455	no	2.23967
ENSRNOG00000026861	Zscan18	zinc finger and SCAN domain containing 18 [Source:MGI Symbol;Acc:MGI:3643810]	1	73.244	73.2514	52.8695	52.8711	1	56.083	64	71.917	83.4576	94.625	104.521	888.683	distant	0.98345	1.12e-05	0.000790929	0.928611	0.00086155	0.0380458	NA	NA	no	no	0.0171109	1	0.66353	0.18931	0.02033	no	2.31805
ENSRNOG00000019138	Clec11a	C-type lectin domain family 11 member A [Source:UniProtKB/Swiss-Prot;Acc:O88201]	1	94.7852	94.7883	64.1281	64.1307	1	53.2424	66	78.7576	74.965	97.125	120.442	240.308	local	0.930392	0.000799783	0.0123772	0.831348	0.020442	0.171633	0.173596	0.937611	no	no	0.508715	1	0.868679	0.16556	0.0429	no	3.02394
ENSRNOG00000019949	Mrps12	28S ribosomal protein S12 mitochondrial [Source:RefSeq peptide;Acc:NP_001099709]	1	83.8452	83.8481	56.2381	56.2392	1	41.8917	54	66.1083	45.7631	78.25	97.2604	286.387	local	0.915311	0.0014237	0.016768	0.915311	0.0014237	0.0445876	0.0110137	0.869902	no	no	0.905303	1	1.00293	0.03048	0.71122	no	3.27926
ENSRNOG00000026109	Prmt1	Protein arginine N-methyltransferase 1 [Source:UniProtKB/Swiss-Prot;Acc:Q63009]	1	95.4491	95.4583	64.6592	64.6666	1	58.6888	66	73.3112	87.986	97.125	109.063	1046.73	local	-0.97148	5.68e-05	0.00300847	-0.81726	0.0247823	0.191854	NA	NA	no	no	0.527778	1	1.13037	-0.0502	0.54164	no	3.45492
ENSRNOG00000017851	Etfb	Electron transfer flavoprotein subunit beta [Source:UniProtKB/Swiss-Prot;Acc:Q68FU3]	1	93.8201	93.8343	63.3561	63.3674	1	63	68	73	93.375	99.625	108.358	3253.59	local	-0.931411	0.000765769	0.0123772	-0.8124	0.0263895	0.20045	0.0151228	1.18674	no	no	0.122391	1	1.29293	-0.1168	0.15466	no	4.01127
ENSRNOG00000021106	Gramd1a	GRAM domain-containing protein 1A [Source:UniProtKB/Swiss-Prot;Acc:Q3KR56]	1	86.1754	86.1969	57.2403	57.2575	1	45.0871	58	70.9129	50.4305	87.125	103.266	230.43	local	-0.879869	0.00395308	0.0322328	-0.879775	0.0090133	0.115476	NA	NA	no	no	0.257379	1	1.16636	-0.1174	0.15252	no	4.11753
ENSRNOG00000021087	Lgi4	leucine-rich repeat LGI family member 4 precursor [Source:RefSeq peptide;Acc:NP_955793]	1	86.1032	86.113	57.1826	57.1904	1	55	60	65	80.75	89.625	95.875	2507.26	local	-0.952219	0.000263034	0.00697041	-0.964373	0.000110054	0.0298765	0.000207132	1.23466	yes	yes	0.10821	1	1.24958	-0.1803	0.02727	no	4.28138
ENSRNOG00000013023	Gltscr2	glioma tumor suppressor candidate region gene 2 protein [Source:RefSeq peptide;Acc:NP_997474]	1	76.2808	76.2886	53.5275	53.5292	1	49	54	59	56.4324	78.25	88.375	2309.19	local	0.932819	0.000720346	0.0123772	0.932819	0.000720346	0.0379751	0.000482335	0.833401	yes	yes	0.33402	1	0.866068	0.33158	3e-05	yes	4.3978
ENSRNOG00000016603	Rtn2	reticulon-2 [Source:RefSeq peptide;Acc:NP_963856]	1	78.647	78.6603	54.1588	54.1641	1	47.4023	58	68.5977	53.8123	87.125	100.372	430.724	local	-0.898787	0.0023993	0.0231021	-0.883394	0.00836706	0.115476	0.0293119	1.10337	no	no	0.159754	1	1.26372	-0.2128	0.00893	no	4.72274
ENSRNOG00000021079	Fxyd1	Phospholemman [Source:UniProtKB/Swiss-Prot;Acc:O08589]	1	86.0956	86.0981	57.1764	57.1785	1	41.5965	54	66.4035	45.332	78.25	97.6293	264.436	local	-0.895754	0.00261533	0.0231021	-0.895754	0.00261533	0.0606207	0.0771345	1.05996	no	no	0.57718	1	0.939038	-0.0913	0.26625	no	4.99231
ENSRNOG00000020495	Eif3k	eukaryotic translation initiation factor 3 subunit K [Source:RefSeq peptide;Acc:NP_001099712]	1	84.0836	84.0935	56.3335	56.3374	1	49.6004	58	66.3996	59.0287	87.125	97.6245	780.038	local	-0.776764	0.0233634	0.102462	-0.963303	0.000485767	0.0371882	NA	NA	no	no	0.0860316	1	1.26844	-0.1273	0.12068	no	5.56409
ENSRNOG00000020102	Sirt2	NAD-dependent protein deacetylase sirtuin-2 [Source:UniProtKB/Swiss-Prot;Acc:Q5RJQ4]	1	83.8731	83.8961	56.2493	56.2584	1	50.65	62	73.35	63.5675	92.125	109.151	351.507	local	0.868601	0.00512746	0.0388222	0.90715	0.00186442	0.0535243	0.0994928	0.935723	no	no	0.871411	1	1.0079	0.19255	0.01824	no	5.96927
ENSRNOG00000017174	Qk	protein quaking [Source:RefSeq peptide;Acc:NP_001108493]	1	44.9226	45.0275	41.3162	41.3881	1	20.2458	32	43.7542	23.4014	33.5068	48.4836	315.14	local	-0.924372	0.001021	0.0133614	-0.695163	0.0376304	0.237865	NA	NA	no	no	0.200531	1	1.15329	-0.185	0.0234	no	6.0826
ENSRNOG00000031439	Rps16_pseudogene	Rps16_pseudogene	19	41.9851	41.9856	42.5945	42.5953	1	55.1028	62	68.8972	81.0069	92.125	100.747	1171.72	distant	0.939578	0.000526789	0.0115187	0.973453	4.58e-05	0.0298765	NA	NA	no	no	0.0871988	1	0.805468	0.26702	0.00096	no	6.25504
ENSRNOG00000019578	Rps16	40S ribosomal protein S16 [Source:UniProtKB/Swiss-Prot;Acc:P62250]	1	83.4606	83.4636	56.0843	56.0854	1	53	58	63	73.8462	87.125	93.375	2847.55	local	0.938942	0.000543337	0.0115187	0.949957	0.00104731	0.0397681	NA	NA	no	no	0.0614665	1	0.780498	0.22129	0.0065	no	6.62466
ENSRNOG00000020650	Slc17a7	Vesicular glutamate transporter 1 [Source:UniProtKB/Swiss-Prot;Acc:Q62634]	1	95.6407	95.6519	64.8126	64.8216	1	54.3876	68	81.6124	79.2189	99.625	124.335	190.749	local	-0.929338	0.00083599	0.0123772	-0.876549	0.0096127	0.116196	0.000173107	0.495314	yes	yes	0.51397	1	1.1236	-0.0888	0.27991	no	7.67812
ENSRNOG00000015976	Snrpn	Small nuclear ribonucleoprotein-associated protein N [Source:UniProtKB/Swiss-Prot;Acc:P63164]	1	111.571	111.593	74.4187	74.4285	1	63.9874	72	80.0126	94.6093	104.625	122.153	866.033	local	-0.958151	0.000177533	0.0053767	-0.973054	0.000225618	0.0298765	0.960537	0.999277	no	no	0.756057	1	1.04686	-0.1969	0.01572	no	8.27721
ENSRNOG00000007979	Phospho2	Pyridoxal phosphate phosphatase PHOSPHO2 [Source:UniProtKB/Swiss-Prot;Acc:Q66HC4]	3	51.9378	51.945	43.9076	43.913	3	34.8114	48	61.1886	39.9864	57.3614	86.9716	213.89	local	-0.876456	0.000875747	0.0123772	-0.884592	0.000673713	0.0379751	0.000806187	1.21888	yes	no	0.126589	1	1.22356	-0.208	0.01063	no	3.3627
ENSRNOG00000001517	Pdk1	pyruvate dehydrogenase kinase isozyme 1 precursor [Source:RefSeq peptide;Acc:NP_446278]	3	54.2921	54.3192	45.684	45.7045	3	39.9728	48	56.0272	46.5178	57.3614	74.068	862.613	local	-0.844342	0.00211906	0.0213925	-0.816265	0.00396855	0.0781237	0.0867044	1.13199	no	no	0.405949	1	1.09511	-0.1746	0.03259	no	3.74312
ENSRNOG00000033206	Entpd5	ectonucleoside triphosphate diphosphohydrolase 5 precursor [Source:RefSeq peptide;Acc:NP_955426]	6	108.44	108.47	67.6949	67.7211	6	59.1684	70	80.8316	97.048	111.071	123.368	404.358	local	0.903742	0.00207183	0.0213925	0.733587	0.0383299	0.239518	0.634655	1.03226	no	no	0.827867	1	0.961251	0.05181	0.52896	no	2.44838
ENSRNOG00000009730	Cyp7b1	25-hydroxycholesterol 7-alpha-hydroxylase [Source:RefSeq peptide;Acc:NP_062011]	2	103.103	103.271	60.1914	60.2464	6	73.4397	86	96	114.996	129.111	144	253.463	distant	0.862412	0.00585806	0.0428244	0.820256	0.0238197	0.190791	0.115451	1.10952	no	no	0.601013	1	1.05304	0.16947	0.03815	no	2.73158
ENSRNOG00000015869	Pccb	propionyl-CoA carboxylase beta chain mitochondrial precursor [Source:RefSeq peptide;Acc:NP_058726]	8	105.946	105.996	81.3027	81.3586	8	80.0932	88	95.9068	104.859	113.583	124.152	891.146	local	-0.295632	0.51976	0.669163	-0.880455	0.000771627	0.0379751	0.688183	0.971057	no	no	0.0575218	1	1.3838	-0.0911	0.26729	no	2.81929
ENSRNOG00000029510	D3ZDX5_RAT	Uncharacterized protein [Source:UniProtKB/TrEMBL;Acc:D3ZDX5]	8	114.11	114.134	88.3792	88.3964	8	78.5573	90	98	103.478	116.361	126.843	342.809	local	0.621672	0.136117	0.300591	0.910635	0.000643084	0.0379751	0.0336494	0.914827	no	no	0.374067	1	0.900573	0.28438	0.00042	no	3.48846
ENSRNOG00000002610	Carhsp1	Calcium-regulated heat stable protein 1 [Source:UniProtKB/Swiss-Prot;Acc:Q9WU49]	10	6.98658	7.00017	2.47072	2.48196	10	0	6	13.2751	4	11.2527	18.1673	1057.04	local	-0.0312638	0.946951	0.972941	-0.927174	0.000913623	0.0380458	0.0229834	1.20131	no	no	0.158467	1	1.32251	-0.1381	0.09192	no	3.18553
ENSRNOG00000009512	Esd	S-formylglutathione hydrolase [Source:UniProtKB/Swiss-Prot;Acc:B0BNE5]	15	55.5567	55.5762	31.2246	31.2279	15	24.0407	36	47.9593	37.8246	61.2438	74.5868	298.165	local	0.787833	0.0202385	0.0946	0.941893	0.00151483	0.045379	0.0454959	0.891023	no	no	0.341636	1	0.88717	0.06365	0.43905	no	4.40375
