# Supplementary figures and images for: Genetic Influences on Brain Gene Expression in Rats Selected for Tameness and Aggression
Source: Oxford University Press journal article supplement (doi:10.1534/genetics.114.168948), 2014-09-03

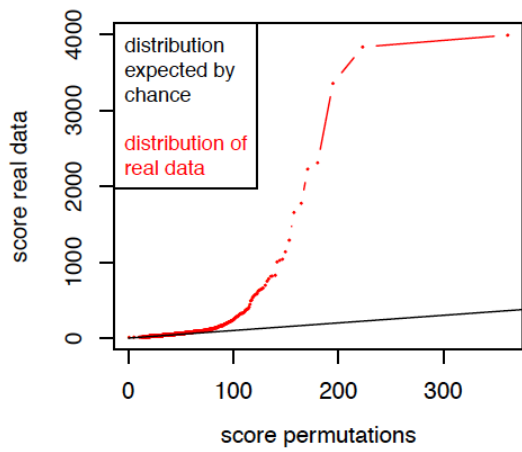

Figure S7. Q-Q plot of expected vs. real FIA eQTL mapping scores.

Supplement: figures7.pdf [file figures7.pdf]
